# Supplementary material for: Locus-Specific Enrichment Analysis of 5-Hydroxymethylcytosine Reveals Novel Genes Associated with Breast Carcinogenesis
Source: MDPI journal article supplement (doi:10.3390/cells11192939), 2022-09-20

# SUPPLEMENTARY FIGURES

Figure S1: PCA and HCA of 5-mC and 5-hmC enriched breast tumour and normal tissues

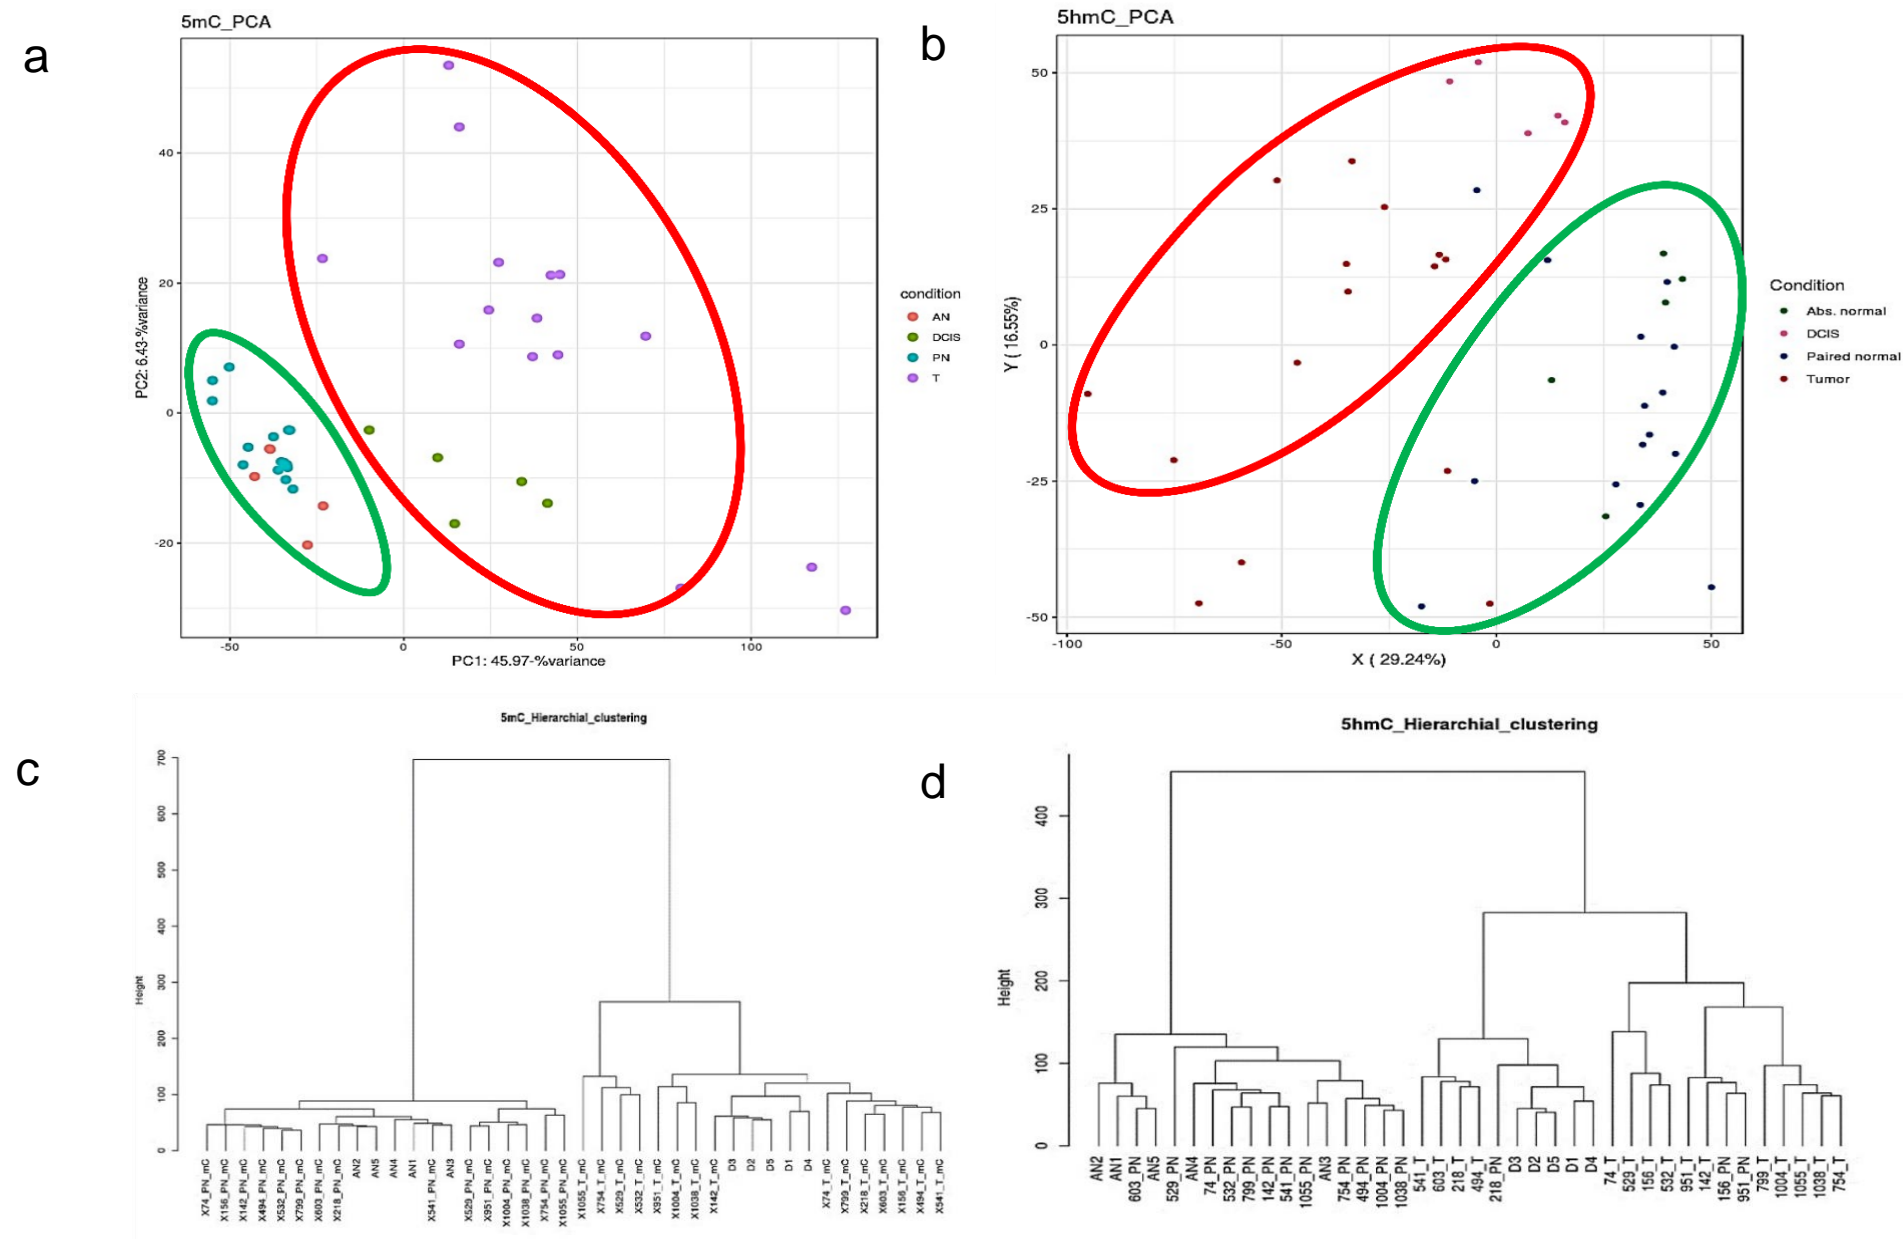

Figure S2: Genome-wide distribution of DhMRs and DMRs

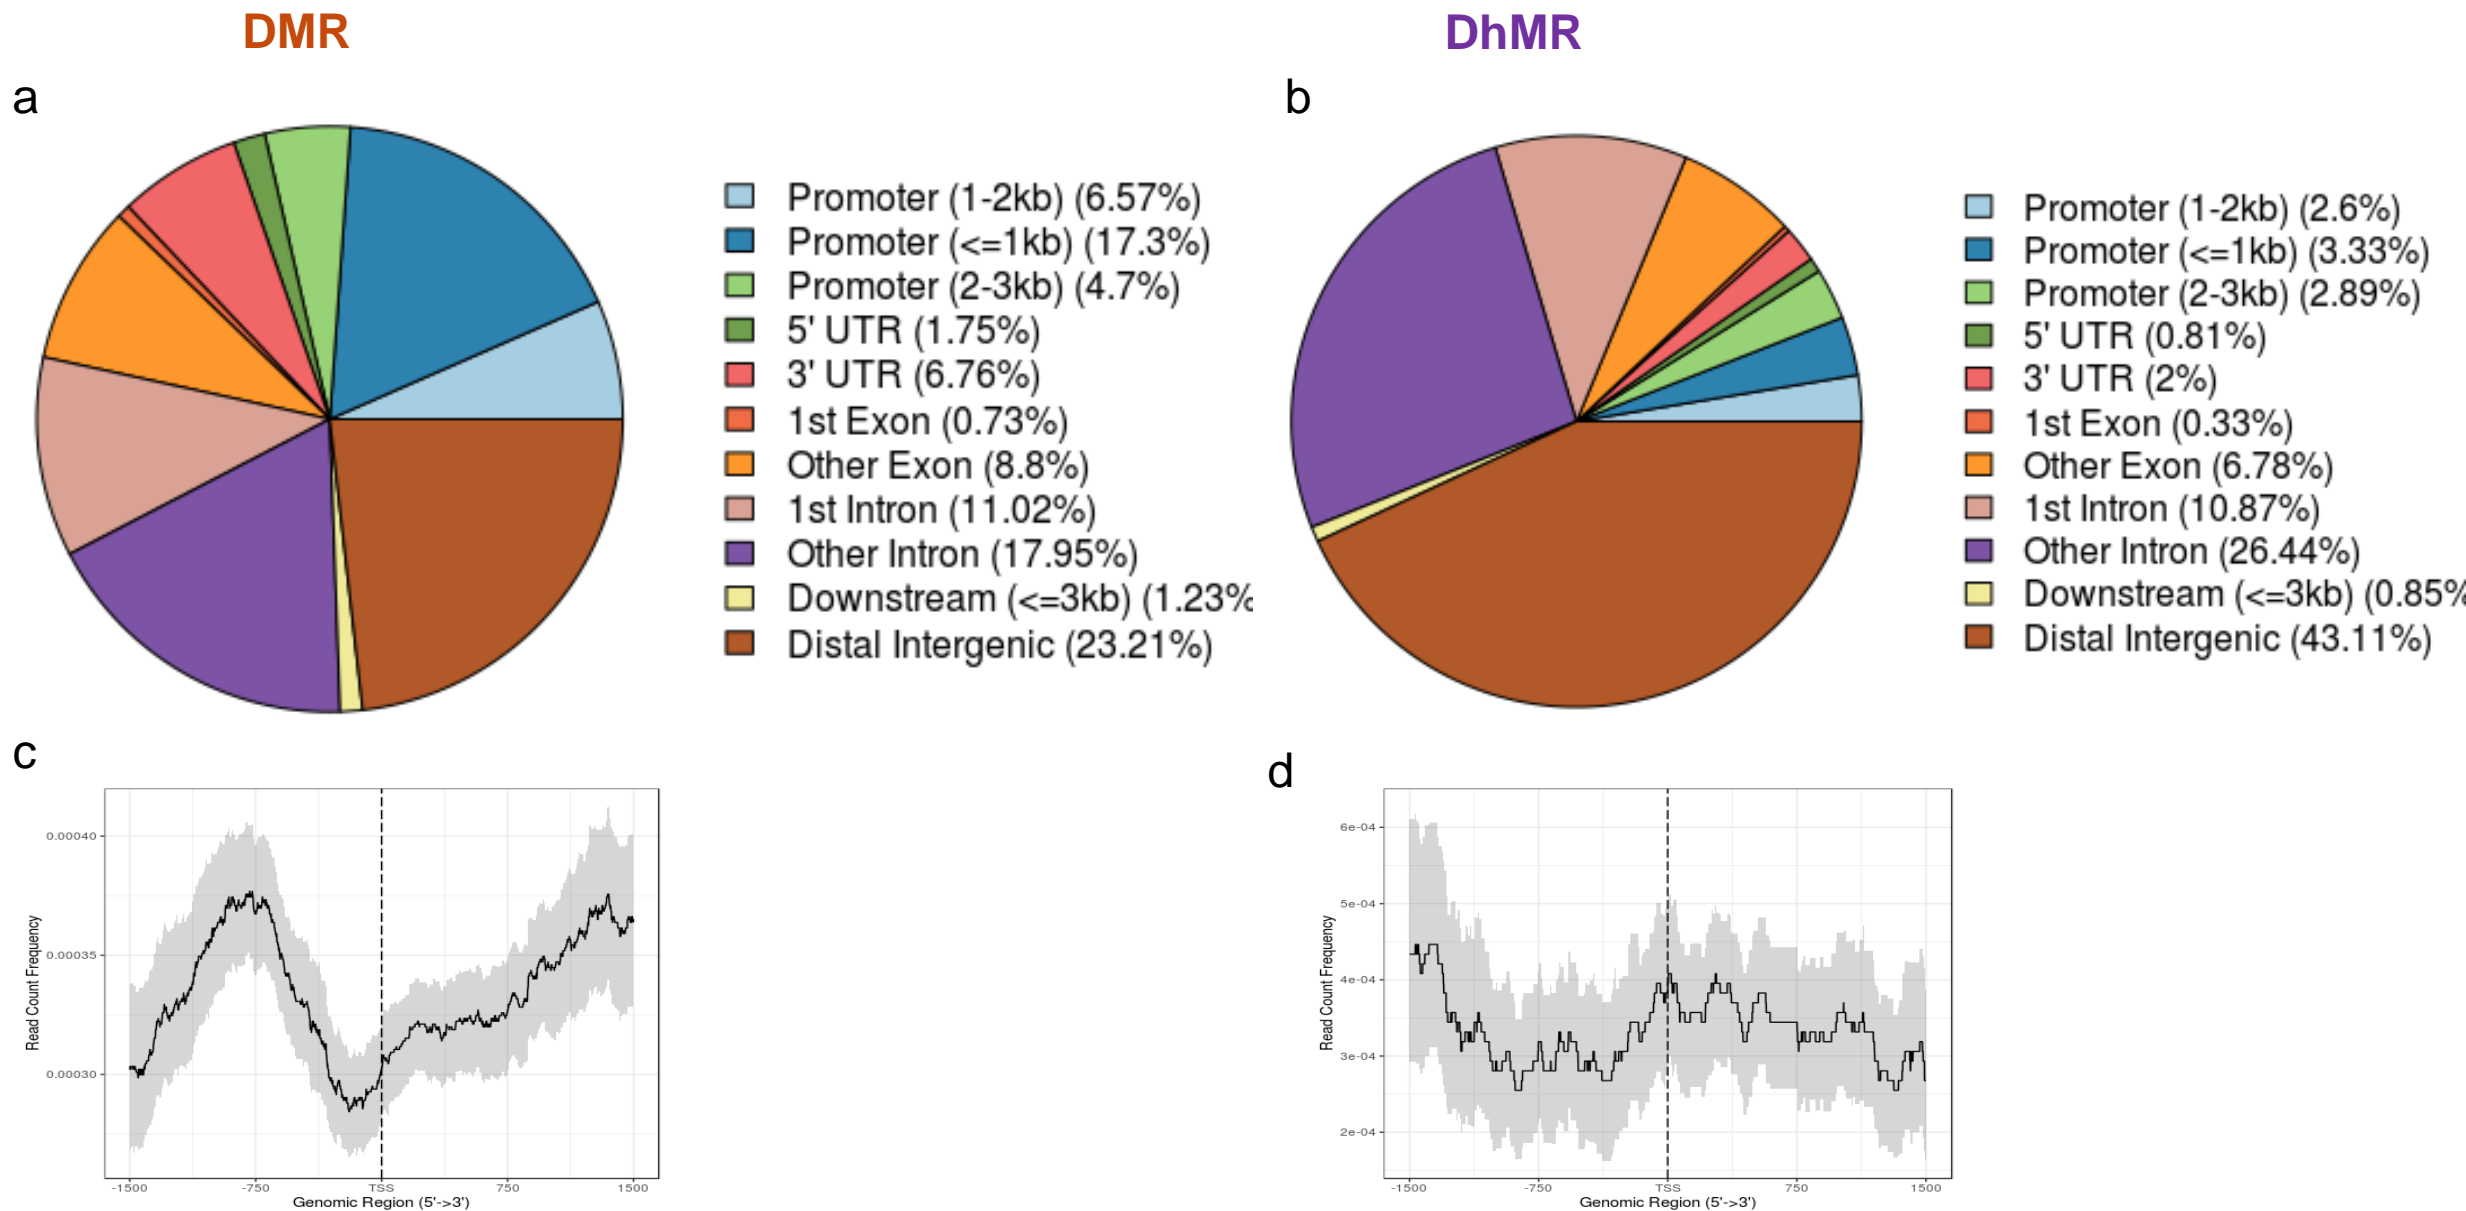

Figure S3. Locus Overlap analysis and ChIP seq analysis using LOLA webtool and UALCAN

a

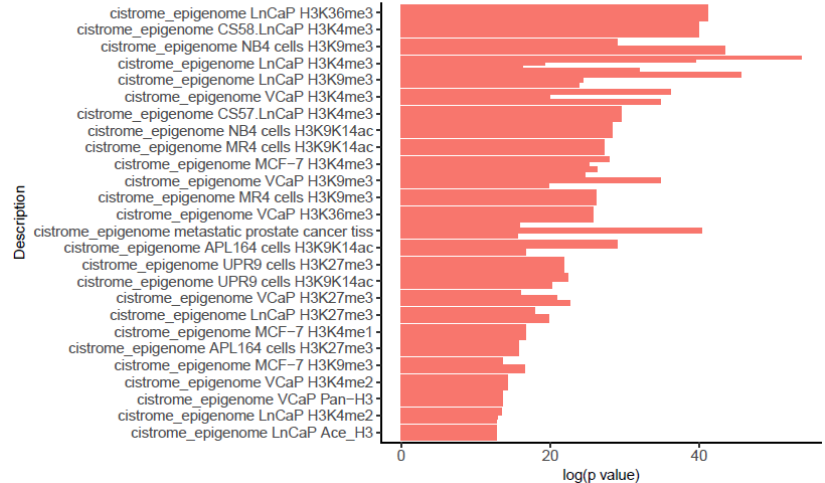

b

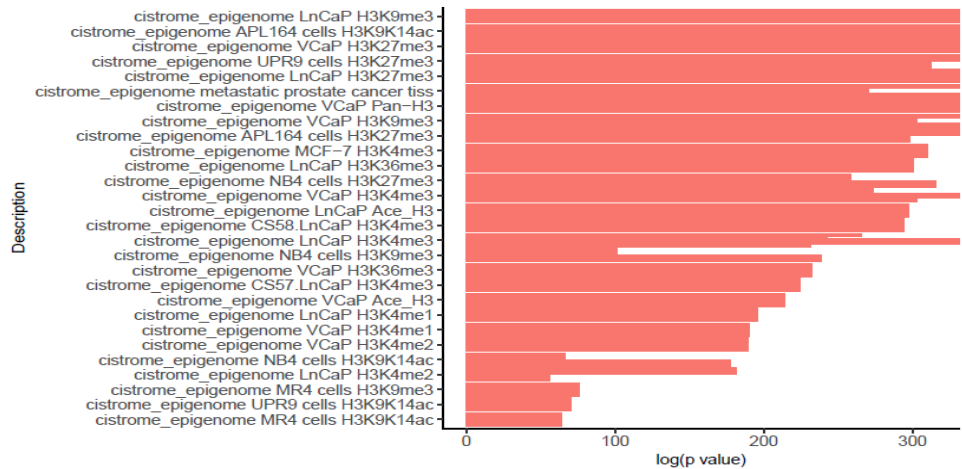

c

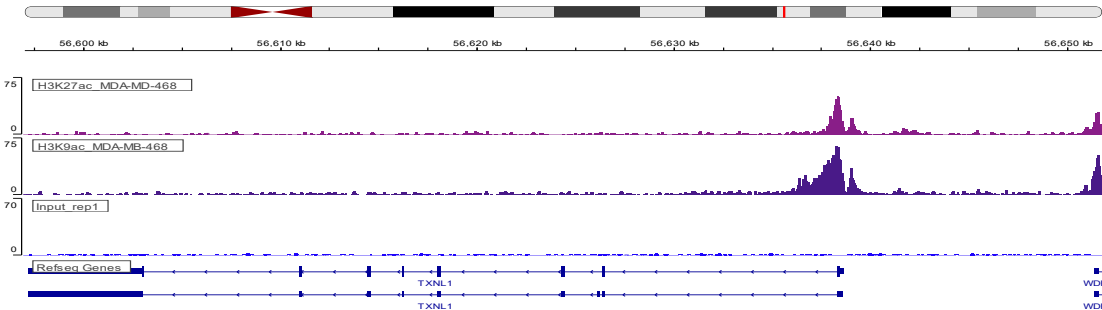

d

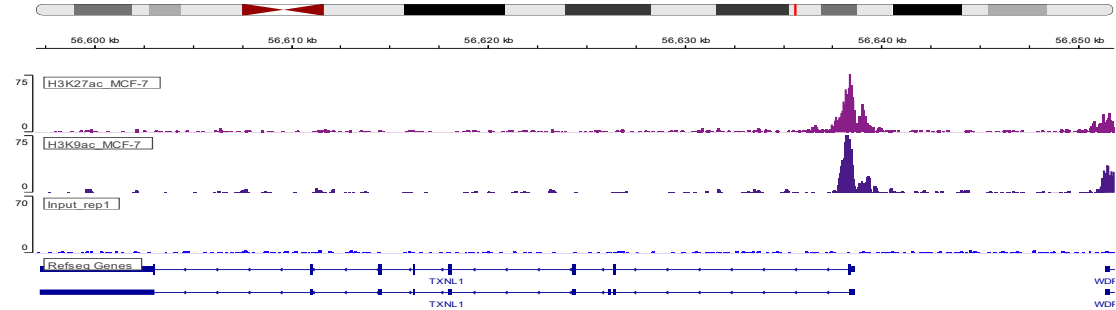

e

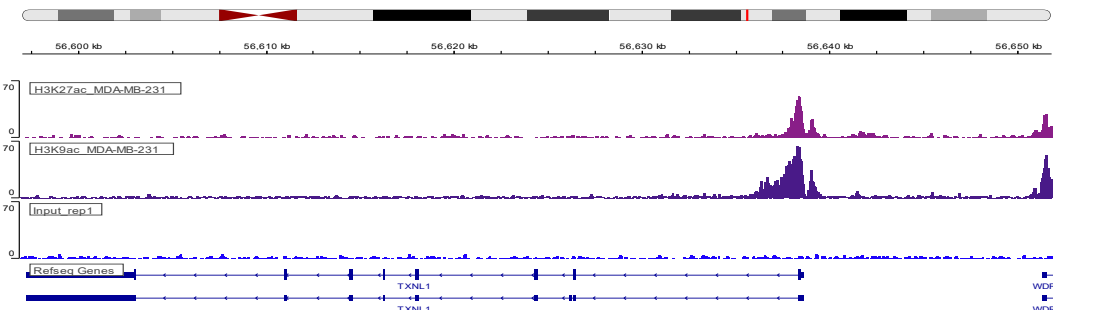

f

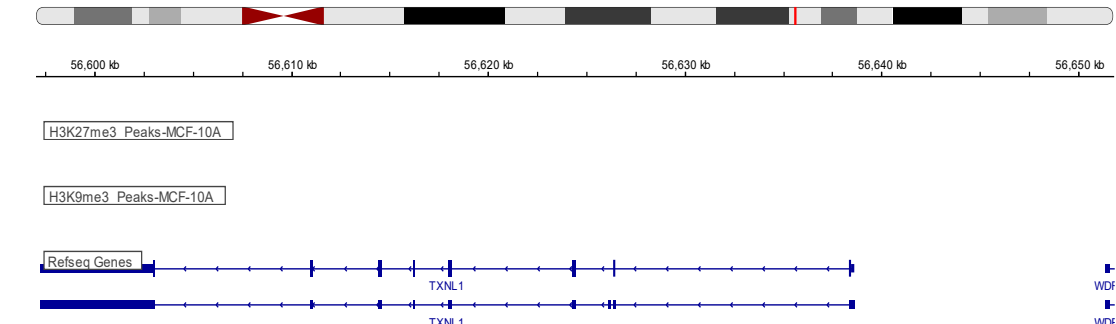

Figure S4: KEGG and GO term pathway enrichment analysis

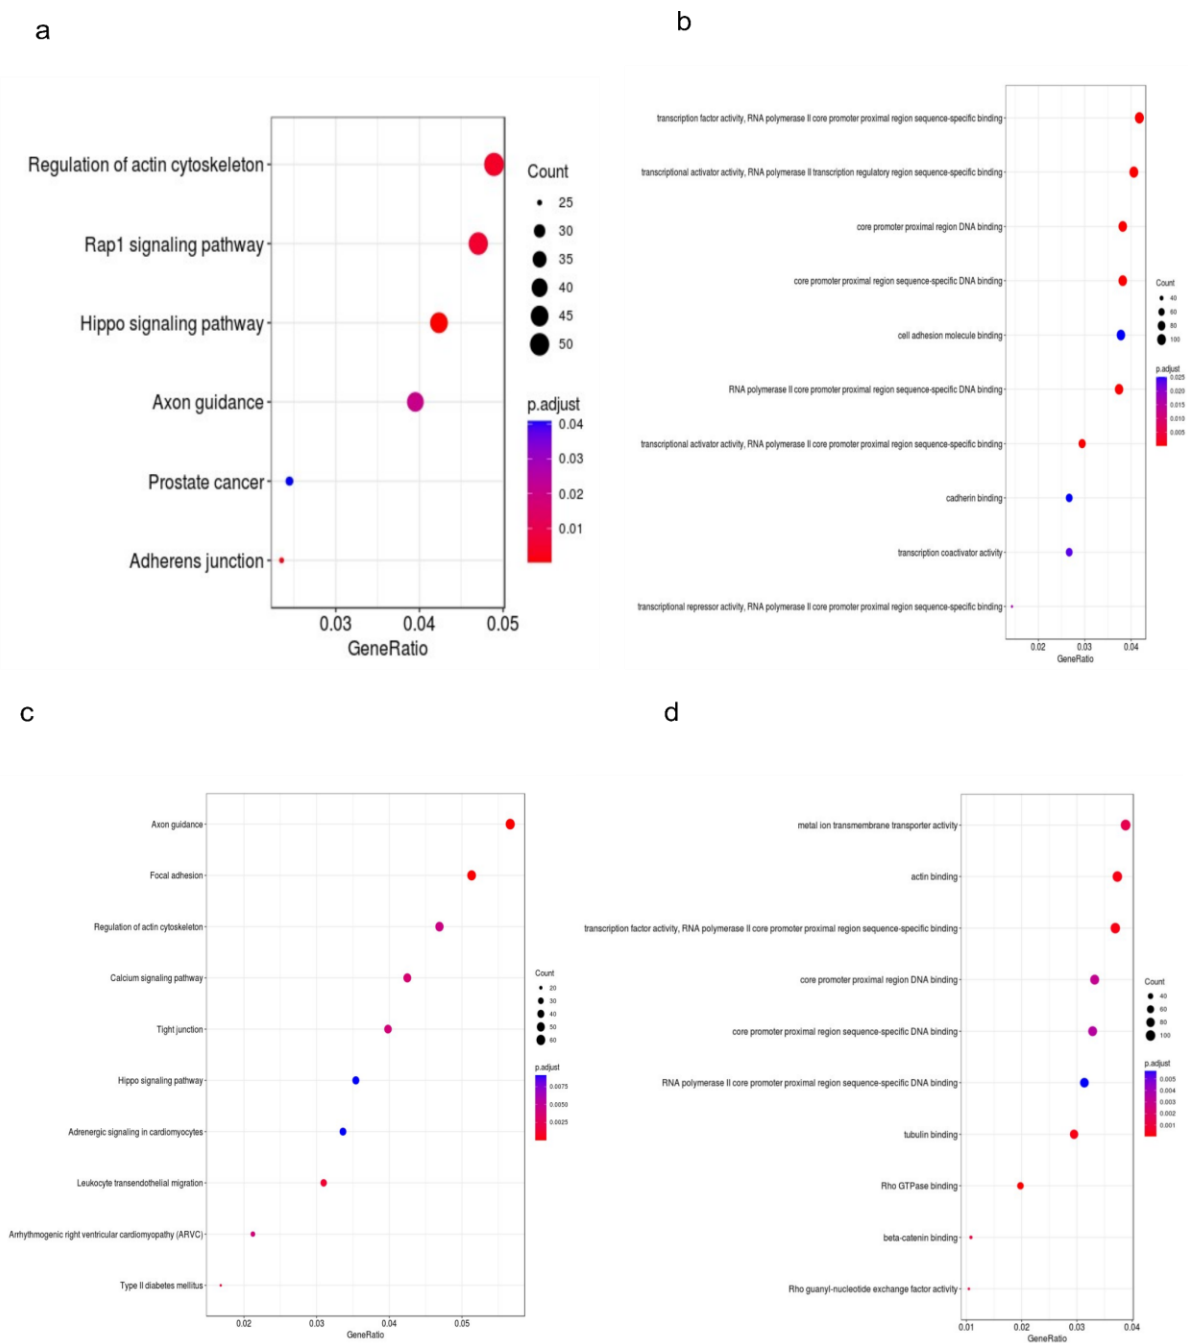

Figure S5. Survival analysis of hyper-hmC candidates

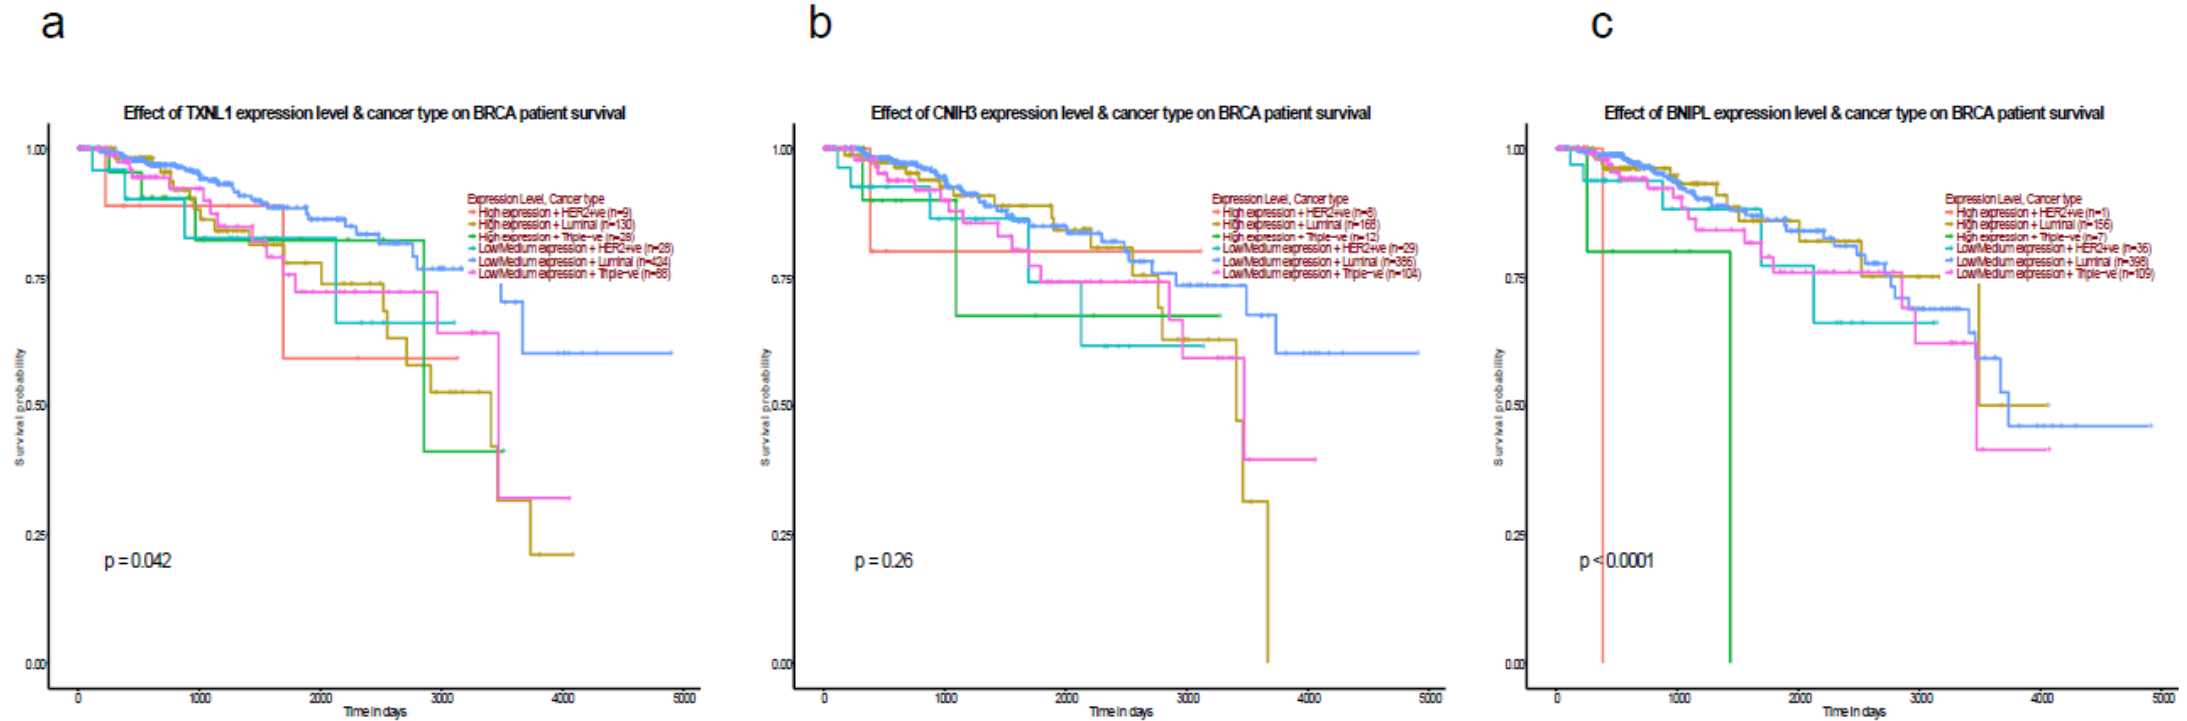

Supplement: s1 [file s1]
