# Supplementary material for: Locus-Specific Enrichment Analysis of 5-Hydroxymethylcytosine Reveals Novel Genes Associated with Breast Carcinogenesis
Source: MDPI journal article supplement (doi:10.3390/cells11192939), 2022-09-20
Supplement: s1 [file s1]

## Supplementary Table

**Table S1a. Genomic Feature of 5-mC in breast cancer and normal**

| Genomic Features<br>tissues |                        | Tumour (IDC)<br>(n>=10)<br>(%) | Paired Normal<br>(n>=10)<br>(%) | DCIS<br>(n=5)<br>(%) | Apparent normal<br>(n=5)<br>(%) |
|-----------------------------|------------------------|--------------------------------|---------------------------------|----------------------|---------------------------------|
| <b>Promoters</b>            | Promoter(>1kb)         | 8.24                           | 6.09                            | 7.41                 | 6.34                            |
|                             | Promoter(1-2kb)        | 4.17                           | 3.44                            | 3.76                 | 3.3                             |
|                             | Promoter(2-3kb)        | 3.68                           | 3.15                            | 3.31                 | 2.88                            |
| <b>UTRs</b>                 | 5'UTR                  | 1.69                           | 1.32                            | 1.54                 | 1.4                             |
|                             | 3'UTR                  | 4.35                           | 3.3                             | 3.89                 | 3.32                            |
| <b>Gene body</b>            | 1st exon               | 0.51                           | 0.4                             | 0.46                 | 0.42                            |
|                             | Other exon             | 9.41                           | 7.98                            | 8.52                 | 7.72                            |
|                             | 1st intron             | 9.72                           | 9.7                             | 9.44                 | 9.57                            |
|                             | Other intron           | 24.26                          | 24.64                           | 24.42                | 24.43                           |
| <b>Distal intergenic</b>    | Downstream<br>(>300kb) | 0.16                           | 0.12                            | 0.12                 | 0.12                            |
|                             | Distal intergenic      | 33.81                          | 39.86                           | 37.13                | 40.5                            |

**Table S1b. Genomic Feature of 5-hmC in breast cancer and normal tissues**

| Genomic features         |                        | Tumour (IDC)<br>(n>=10)<br>(%) | Paired Normal<br>(n>=10)<br>(%) | DCIS<br>(n=5)<br>(%) | Apparent normal<br>(n=5)<br>(%) |
|--------------------------|------------------------|--------------------------------|---------------------------------|----------------------|---------------------------------|
| <b>Promoters</b>         | Promoter(>1kb)         | 24.89                          | 30.89                           | 48.74                | 6.25                            |
|                          | Promoter(1-2kb)        | 2.46                           | 2.3                             | 1.88                 |                                 |
|                          | Promoter(2-3kb)        | 2.6                            | 2.69                            | 2.06                 | 6.25                            |
| <b>UTRs</b>              | 5'UTR                  | 1.46                           | 1.57                            | 0.97                 |                                 |
|                          | 3'UTR                  | 3.64                           | 3.99                            | 2.64                 |                                 |
| <b>Gene body</b>         | 1st exon               | 0.9                            | 0.88                            | 1.12                 | 12.5                            |
|                          | Other exon             | 5.8                            | 6.52                            | 3.44                 | 25                              |
|                          | 1st intron             | 7.73                           | 6.63                            | 4.61                 | 6.25                            |
|                          | Other intron           | 14.37                          | 12.66                           | 7.02                 | 18.75                           |
| <b>Distal intergenic</b> | Downstream<br>(>300kb) | 0.08                           | 0.08                            | 0.13                 |                                 |
|                          | Distal intergenic      | 35.98                          | 31.8                            | 27.4                 | 25                              |
