# Supplementary material for: Locus-Specific Enrichment Analysis of 5-Hydroxymethylcytosine Reveals Novel Genes Associated with Breast Carcinogenesis
Source: Cells. 2022 Sep 20;11(19):2939. doi: 10.3390/cells11192939 (PMC9562672; doi:10.3390/cells11192939)
Supplement: Supplementary file 1 [file cells-11-02939-s001.zip]

Archive with 6 entries (6 files):
- File S1a-b_Landscape_Manuscript.xlsx
- File S2a-d_Landscape_Manuscript.xlsx
- File S3a-d_Landscape_Manuscript.xlsx
- File S4_Landscape_Manuscript.xlsx
- Supplementary figures.pdf
- Table S1a-b.pdf
