# Supplementary material for: Locus-Specific Enrichment Analysis of 5-Hydroxymethylcytosine Reveals Novel Genes Associated with Breast Carcinogenesis
Source: Cells. 2022 Sep 20;11(19):2939. doi: 10.3390/cells11192939 (PMC9562672; doi:10.3390/cells11192939)
Supplement: Supplementary file 1 [file cells-11-02939-s001.zip › File S1a-b_Landscape_Manuscript.xlsx]

## Sheet: 1a.DhMR
				Landscape of 5-hydromethylcytosine in breast cancer
				Differentially hydroxymethylated breast cancer loci
DhMR- LOCI	t_mean	d_mean	pn_mean	an_mean	tan_l2fc	dan_l2fc	pan_l2fc	pvalue	padj(fdr)	PN_peaks	T_peaks	AN_peaks	D_peaks	Annotation	geneId.x	ENSEMBL	Gene symbol	seqnames	start	end
chr10|100183044|100184085	3.56696	2.78763	4.13984	3.03653	0.232273	-0.123384	0.447154	0.00514319	0.0853475	11	9	2	0	Promoter (1-2kb)	3257	ENSG00000107521	HPS1	chr10	100183044	100184085
chr10|100424021|100424362	4.7288	7.4439	7.86015	7.72754	-0.708534	-0.0539503	0.0245473	0.00365193	0.0770554	1	0	1	1	Intron (uc001kpn.2/60495, intron 6 of 11)	3257	ENSG00000107521	HPS1	chr10	100424021	100424362
chr10|101204224|101204979	2.66536	3.18695	3.56467	3.81068	-0.51572	-0.257872	-0.0962797	0.00837242	0.0993068	10	5	0	1	Distal Intergenic	2805	ENSG00000120053	GOT1	chr10	101204224	101204979
chr10|101244402|101245246	4.99741	5.37629	7.4426	7.26118	-0.539022	-0.433593	0.0356033	0.00393548	0.0785836	6	8	3	3	Distal Intergenic	159296	ENSG00000119919	NKX2-3	chr10	101244402	101245246
chr10|101525041|101525351	5.23804	5.07338	7.35167	7.54752	-0.526977	-0.573054	-0.0379307	0.00273375	0.0711969	0	1	0	1	Distal Intergenic	1244	ENSG00000023839	ABCC2	chr10	101525041	101525351
chr10|101548526|101549329	2.88312	3.17252	4.25185	4.49573	-0.640923	-0.502924	-0.0804649	0.00436623	0.081192	1	3	1	2	Intron (uc001kqf.2/1244, intron 2 of 31)	1244	ENSG00000023839	ABCC2	chr10	101548526	101549329
chr10|101617181|101617899	2.3395	3.0074	3.16308	3.32147	-0.505625	-0.143309	-0.0704942	0.00832337	0.0991269	7	2	1	1	Distal Intergenic	23268	ENSG00000107554	DNMBP	chr10	101617181	101617899
chr10|101785607|101785928	4.28504	2.92064	5.49264	5.50487	-0.361399	-0.914428	-0.00320952	0.000458151	0.0606188	0	4	1	0	Distal Intergenic	23268	ENSG00000107554	DNMBP	chr10	101785607	101785928
chr10|102752635|102753001	4.7034	4.36948	7.06648	5.57071	-0.244156	-0.3504	0.34313	0.00328654	0.0746573	2	1	1	0	3' UTR	84445	ENSG00000107816	LZTS2	chr10	102752635	102753001
chr10|103104578|103104952	3.61758	4.55241	5.03159	4.90142	-0.438175	-0.106569	0.0378159	0.00616757	0.0902816	1	2	0	0	Distal Intergenic	8945	ENSG00000166167	BTRC	chr10	103104578	103104952
chr10|103337500|103341228	3.03386	2.76142	3.74992	2.91985	0.0552615	-0.0804824	0.360964	0.00434441	0.0810536	9	6	4	0	Promoter (1-2kb)	27343	ENSG00000166169	POLL	chr10	103337500	103341228
chr10|103942628|103943905	2.39991	2.78817	3.27556	2.71162	-0.176175	0.0401665	0.272588	0.00509664	0.0850037	2	2	2	0	Distal Intergenic	9221	ENSG00000166197	NOLC1	chr10	103942628	103943905
chr10|104056421|104056727	4.91714	3.31604	5.74923	5.71743	-0.217546	-0.785907	0.00800252	0.00573042	0.088155	1	1	0	0	Intron (uc001kuw.3/8729, intron 3 of 9)	8729	ENSG00000107862	GBF1	chr10	104056421	104056727
chr10|104139302|104139683	5.21398	2.74383	5.85396	3.84627	0.438925	-0.487268	0.605954	0.00464505	0.0827781	5	8	1	0	Exon (uc001kux.2/8729, exon 35 of 40)	4791	ENSG00000077150	NFKB2	chr10	104139302	104139683
chr10|104387634|104388953	2.93591	4.11305	4.80191	4.67352	-0.670701	-0.184299	0.0390993	0.00161148	0.063485	9	6	0	5	Intron (uc001kvy.2/51684, intron 11 of 11)	81603	ENSG00000171206	TRIM8	chr10	104387634	104388953
chr10|104744507|104745138	2.47838	2.85067	3.5206	3.84344	-0.633	-0.431096	-0.126576	0.0016741	0.0638452	5	8	1	1	Intron (uc001kwm.3/54805, intron 1 of 7)	54805	ENSG00000148842	CNNM2	chr10	104744507	104745138
chr10|104835544|104837394	3.79585	2.65354	4.44932	3.55679	0.0938468	-0.422654	0.323011	0.00654801	0.0917845	8	6	2	0	3' UTR	22978	ENSG00000076685	NT5C2	chr10	104835544	104837394
chr10|105041168|105041682	4.25142	6.60807	6.38843	6.76462	-0.670065	-0.0337802	-0.0825479	0.00708193	0.0940715	7	3	0	3	Intron (uc001kws.3/9118, intron 1 of 2)	9118	ENSG00000148798	INA	chr10	105041168	105041682
chr10|105167567|105168024	4.86626	2.65298	5.15018	3.45906	0.492432	-0.382768	0.574244	0.00509664	0.0850037	9	7	1	0	Intron (uc001kwy.1/22984, intron 7 of 35)	22984	ENSG00000148843	PDCD11	chr10	105167567	105168024
chr10|105193752|105194033	7.07568	8.04078	10.9241	9.74661	-0.462032	-0.277564	0.164548	0.00181332	0.0646663	1	0	0	1	Exon (uc001kwy.1/22984, exon 23 of 36)	51063	ENSG00000138172	CALHM2	chr10	105193752	105194033
chr10|105262661|105263519	3.57126	5.32365	5.11714	5.58327	-0.644678	-0.0686933	-0.125772	0.00712052	0.0942568	7	7	0	1	Intron (uc001kxh.3/9148, intron 1 of 5)	9148	ENSG00000107954	NEURL1	chr10	105262661	105263519
chr10|105280997|105282230	2.54666	2.72218	3.59486	2.97546	-0.224506	-0.128352	0.272822	0.00161667	0.063485	7	4	0	1	Intron (uc001kxh.3/9148, intron 1 of 5)	9148	ENSG00000107954	NEURL1	chr10	105280997	105282230
chr10|105375407|105375777	4.64891	4.56189	7.1896	7.41726	-0.673992	-0.701254	-0.0449747	0.00132062	0.0617149	5	3	1	0	Intron (uc010qqr.2/9644, intron 5 of 7)	9644	ENSG00000107957	SH3PXD2A	chr10	105375407	105375777
chr10|105379114|105380075	4.57843	5.62378	6.95978	7.30706	-0.674439	-0.377751	-0.0702492	0.000267122	0.0606188	5	6	3	2	Intron (uc010qqr.2/9644, intron 4 of 7)	9644	ENSG00000107957	SH3PXD2A	chr10	105379114	105380075
chr10|105411884|105413603	3.04873	4.3071	4.05547	4.33722	-0.508563	-0.0100539	-0.0969035	0.0020374	0.0662832	7	7	2	4	Intron (uc010qqr.2/9644, intron 2 of 7)	9644	ENSG00000107957	SH3PXD2A	chr10	105411884	105413603
chr10|105495534|105495867	4.89345	4.0972	6.79303	4.86722	0.0077517	-0.248462	0.480955	0.0024833	0.0694567	1	2	1	0	Promoter (<=1kb)	9644	ENSG00000107957	SH3PXD2A	chr10	105495534	105495867
chr10|105517112|105518887	2.99144	5.37198	4.9419	5.37227	-0.844692	-7.86897e-05	-0.120466	0.00318169	0.0739993	10	9	1	4	Intron (uc001kxj.1/9644, intron 3 of 13)	100505839	ENSG00000280693	SH3PXD2A-AS1	chr10	105517112	105518887
chr10|105543194|105543650	5.52566	6.43611	8.46129	8.54808	-0.629454	-0.409412	-0.0147238	0.00133897	0.0620006	5	2	1	1	Intron (uc001kxj.1/9644, intron 2 of 13)	100505839	ENSG00000280693	SH3PXD2A-AS1	chr10	105543194	105543650
chr10|105619381|105619773	5.72643	3.87422	6.21939	7.44634	-0.378895	-0.942625	-0.259758	0.004826	0.0838045	0	3	0	0	Distal Intergenic	9644	ENSG00000107957	SH3PXD2A	chr10	105619381	105619773
chr10|106339771|106341413	2.2211	3.24984	3.17479	3.80918	-0.778207	-0.229112	-0.262816	0.000789586	0.0606188	3	6	0	4	Distal Intergenic	22986	ENSG00000156395	SORCS3	chr10	106339771	106341413
chr10|1065386|1066426	3.52581	2.85953	4.19867	3.61155	-0.0346632	-0.336837	0.217316	0.00733984	0.0951083	5	5	1	0	Promoter (2-3kb)	55853	ENSG00000232656	IDI2-AS1	chr10	1065386	1066426
chr10|108175162|108175532	5.84031	3.90699	9.33335	9.40872	-0.687955	-1.26794	-0.0116036	0.00671634	0.0925404	9	3	0	0	Distal Intergenic	114815	ENSG00000108018	SORCS1	chr10	108175162	108175532
chr10|108585401|108585982	3.48143	4.98217	4.95513	7.01585	-1.01094	-0.493842	-0.501695	0.00573823	0.0881672	6	6	3	5	Intron (uc001kyl.3/114815, intron 3 of 26)	114815	ENSG00000108018	SORCS1	chr10	108585401	108585982
chr10|111412240|111412887	5.69917	8.9046	8.61053	9.13459	-0.680587	-0.0367889	-0.0852378	0.00453642	0.0820866	4	4	4	1	Distal Intergenic	7511	ENSG00000108039	XPNPEP1	chr10	111412240	111412887
chr10|111624482|111625409	3.42025	2.72398	4.18863	3.86398	-0.175987	-0.504372	0.116388	0.00658373	0.0919146	5	5	2	0	3' UTR	7511	ENSG00000108039	XPNPEP1	chr10	111624482	111625409
chr10|111693051|111693709	4.20107	6.07809	6.62624	6.85696	-0.706815	-0.173953	-0.04938	0.00233552	0.0685748	4	4	2	0	Distal Intergenic	7511	ENSG00000108039	XPNPEP1	chr10	111693051	111693709
chr10|112123683|112123994	5.68687	9.96784	12.0443	11.9543	-1.07182	-0.262174	0.0108228	0.000147816	0.0606188	0	1	0	1	Distal Intergenic	10285	ENSG00000119953	SMNDC1	chr10	112123683	112123994
chr10|112706780|112707129	5.00255	1.80411	3.93021	4.05741	0.302106	-1.16927	-0.0459515	0.00667386	0.0924031	0	4	1	0	Intron (uc001kzl.4/8036, intron 1 of 8)	644511	ENSG00000234118	RPL13AP6	chr10	112706780	112707129
chr10|112874292|112877833	2.76825	3.44511	3.51205	3.59007	-0.375037	-0.059462	-0.0316982	0.00499571	0.0846289	6	9	4	4	Distal Intergenic	150	ENSG00000150594	ADRA2A	chr10	112874292	112877833
chr10|11289496|11290251	2.65889	2.91872	1.46936	1.80504	0.558787	0.693301	-0.296844	0.000853249	0.0606188	0	6	1	1	Intron (uc010qbi.2/10659, intron 2 of 7)	10659	ENSG00000048740	CELF2	chr10	11289496	11290251
chr10|113022199|113022536	4.74855	4.61478	7.05821	6.4027	-0.431193	-0.472418	0.140622	0.00568378	0.0878968	2	3	1	1	Distal Intergenic	150	ENSG00000150594	ADRA2A	chr10	113022199	113022536
chr10|113822250|113822634	4.40849	6.35656	6.01725	7.03999	-0.67529	-0.147326	-0.226468	0.00339171	0.0752733	4	3	1	1	Distal Intergenic	57678	ENSG00000119927	GPAM	chr10	113822250	113822634
chr10|113896794|113897360	5.70339	9.45578	8.77567	8.66344	-0.60312	0.126256	0.018569	0.00122801	0.0612161	5	5	0	2	Distal Intergenic	57678	ENSG00000119927	GPAM	chr10	113896794	113897360
chr10|114350752|114351136	3.74539	2.46891	4.7422	3.71861	0.0103556	-0.590889	0.350796	0.00561197	0.0876659	1	2	0	0	Intron (uc001kzy.3/143187, intron 5 of 7)	100422909	ENSG00000264763	MIR4295	chr10	114350752	114351136
chr10|114543609|114544005	6.12264	5.74295	9.54903	11.0595	-0.853055	-0.945416	-0.211854	0.00274126	0.0712562	6	6	0	1	Intron (uc001kzz.3/143187, intron 7 of 7)	100422909	ENSG00000264763	MIR4295	chr10	114543609	114544005
chr10|114571366|114572228	2.71642	4.45142	4.46435	4.81632	-0.826223	-0.113664	-0.109479	0.00242044	0.0690791	4	4	0	3	Intron (uc001kzz.3/143187, intron 7 of 7)	6934	ENSG00000148737	TCF7L2	chr10	114571366	114572228
chr10|114657986|114658679	4.64186	6.7484	6.94758	7.4	-0.672822	-0.132979	-0.0910146	0.000214503	0.0606188	4	1	3	4	Distal Intergenic	6934	ENSG00000148737	TCF7L2	chr10	114657986	114658679
chr10|114660490|114661046	3.1485	2.3424	1.98208	1.8146	0.795013	0.368336	0.127364	0.00217642	0.0672001	2	5	1	0	Distal Intergenic	6934	ENSG00000148737	TCF7L2	chr10	114660490	114661046
chr10|114760218|114760800	3.45178	4.75034	5.34658	5.21581	-0.595548	-0.134861	0.0357253	0.0016286	0.0635107	4	3	1	1	Intron (uc001lac.4/6934, intron 3 of 13)	6934	ENSG00000148737	TCF7L2	chr10	114760218	114760800
chr10|114776337|114776704	4.16234	4.62126	6.80803	7.09978	-0.770378	-0.61949	-0.0605382	0.000469537	0.0606188	4	4	1	1	Intron (uc001lac.4/6934, intron 3 of 13)	6934	ENSG00000148737	TCF7L2	chr10	114776337	114776704
chr10|114917536|114918120	4.40002	4.27853	5.87816	5.78968	-0.395973	-0.436368	0.0218822	0.000592342	0.0606188	0	4	1	0	Exon (uc001lac.4/6934, exon 11 of 14)	6934	ENSG00000148737	TCF7L2	chr10	114917536	114918120
chr10|114961934|114962621	3.26499	3.10403	4.00785	3.87385	-0.246687	-0.319626	0.0490624	0.00852513	0.0997758	1	1	2	0	Distal Intergenic	6934	ENSG00000148737	TCF7L2	chr10	114961934	114962621
chr10|115033366|115033725	7.49486	11.5653	11.4605	16.1468	-1.10728	-0.481446	-0.494585	0.00410772	0.0796435	5	3	0	1	Distal Intergenic	6934	ENSG00000148737	TCF7L2	chr10	115033366	115033725
chr10|115253789|115254263	3.11223	3.90208	4.8363	5.91821	-0.927212	-0.600916	-0.291255	0.00722118	0.094682	10	6	2	3	Distal Intergenic	3026	ENSG00000148702	HABP2	chr10	115253789	115254263
chr10|115406322|115407410	3.51042	5.54513	6.27833	6.73483	-0.939996	-0.280421	-0.101259	0.00401336	0.0791321	10	7	0	4	Exon (uc001laj.4/4892, exon 10 of 42)	4892	ENSG00000197893	NRAP	chr10	115406322	115407410
chr10|115723431|115724469	3.52286	2.68991	4.31084	3.6764	-0.0615461	-0.450733	0.229678	0.00366528	0.0770684	7	7	2	0	Distal Intergenic	153	ENSG00000043591	ADRB1	chr10	115723431	115724469
chr10|116003245|116004140	4.28515	5.55213	5.58441	5.54135	-0.370892	0.00280452	0.0111674	0.00684538	0.0931247	10	9	0	4	Intron (uc001lbk.2/340706, intron 1 of 11)	340706	ENSG00000165816	VWA2	chr10	116003245	116004140
chr10|116007790|116009366	2.77151	2.70981	3.58673	3.15859	-0.188613	-0.221093	0.183386	0.00408905	0.0795579	5	4	2	0	Promoter (<=1kb)	340706	ENSG00000165816	VWA2	chr10	116007790	116009366
chr10|116092234|116092885	2.7175	4.39209	4.53411	4.87539	-0.843237	-0.150611	-0.104699	0.00102657	0.0606784	4	4	0	3	Intron (uc001lbn.3/84632, intron 3 of 18)	84632	ENSG00000169129	AFAP1L2	chr10	116092234	116092885
chr10|116133894|116134345	4.55874	6.26611	7.80475	10.4527	-1.19717	-0.738239	-0.421455	0.00429524	0.0807912	11	10	1	4	Intron (uc001lbn.3/84632, intron 1 of 18)	84632	ENSG00000169129	AFAP1L2	chr10	116133894	116134345
chr10|116195389|116195682	4.73839	2.57686	4.45846	3.6991	0.357222	-0.52156	0.269374	0.00666177	0.0922866	1	2	0	0	3' UTR	84632	ENSG00000169129	AFAP1L2	chr10	116195389	116195682
chr10|116361114|116361913	4.18255	4.46192	6.03398	5.00741	-0.259681	-0.166399	0.269048	0.00689518	0.0933592	2	5	2	2	3' UTR	3983	ENSG00000099204	ABLIM1	chr10	116361114	116361913
chr10|117640505|117640925	4.0028	2.65449	4.88058	1.97147	1.02174	0.429167	1.30778	0.00211836	0.0669652	0	2	1	0	Intron (uc001lcg.3/26033, intron 28 of 28)	2674	ENSG00000151892	GFRA1	chr10	117640505	117640925
chr10|117816399|117816691	5.22301	4.05915	4.86937	7.48162	-0.518468	-0.882174	-0.619616	0.00726052	0.0948325	0	2	0	0	3' UTR	2674	ENSG00000151892	GFRA1	chr10	117816399	117816691
chr10|118029034|118029394	5.62218	6.22897	9.07231	9.31961	-0.729141	-0.581276	-0.0387988	0.000262692	0.0606188	6	2	0	0	Promoter (2-3kb)	2674	ENSG00000151892	GFRA1	chr10	118029034	118029394
chr10|118288117|118289277	4.03411	5.49172	5.92296	6.10542	-0.59784	-0.152831	-0.0437708	0.00143394	0.0624095	8	7	4	4	Distal Intergenic	5406	ENSG00000175535	PNLIP	chr10	118288117	118289277
chr10|118420624|118420884	5.49482	6.711	7.53903	8.52849	-0.634217	-0.345761	-0.177912	0.00650069	0.0915769	0	2	0	1	Downstream (2-3kb)	143379	ENSG00000165863	C10orf82	chr10	118420624	118420884
chr10|118441575|118443802	2.83605	4.1255	3.43224	3.44908	-0.282328	0.258357	-0.00706224	0.0014267	0.062351	8	11	2	4	Exon (uc001lct.3/259217, exon 7 of 12)	143379	ENSG00000165863	C10orf82	chr10	118441575	118443802
chr10|118515715|118516067	4.46494	4.02376	7.65808	7.75437	-0.79637	-0.946467	-0.0180276	0.0003147	0.0606188	4	1	0	1	Intron (uc001lcu.3/259217, intron 2 of 13)	259217	ENSG00000165868	HSPA12A	chr10	118515715	118516067
chr10|118568561|118569775	4.54703	6.59735	6.6014	6.82377	-0.585643	-0.0486816	-0.0477957	0.000248446	0.0606188	5	6	4	4	Intron (uc001lcu.3/259217, intron 2 of 13)	387712	ENSG00000188316	ENO4	chr10	118568561	118569775
chr10|118593711|118595375	2.72	3.2086	3.56475	3.99836	-0.5558	-0.317464	-0.165606	0.00802046	0.0978443	9	11	2	4	5' UTR	387712	ENSG00000188316	ENO4	chr10	118593711	118595375
chr10|118623592|118623912	4.31461	3.12572	5.80792	5.46142	-0.340045	-0.80509	0.0887455	0.00392115	0.0784605	0	1	1	0	Intron (uc001lcw.3/387712, intron 1 of 6)	259217	ENSG00000165868	HSPA12A	chr10	118623592	118623912
chr10|118783569|118784165	3.35233	3.38114	4.60436	4.50125	-0.425159	-0.412814	0.0326754	0.0060074	0.0895372	7	2	1	1	Intron (uc010qsq.1/57698, intron 2 of 17)	57698	ENSG00000187164	SHTN1	chr10	118783569	118784165
chr10|118844089|118844472	5.87892	11.7494	10.3136	11.2035	-0.930323	0.068636	-0.119405	0.000970431	0.0606188	5	5	0	2	Intron (uc010qsq.1/57698, intron 1 of 17)	57698	ENSG00000187164	SHTN1	chr10	118844089	118844472
chr10|118862390|118863210	2.48828	2.96235	3.02027	3.57064	-0.521032	-0.269439	-0.241504	0.00831585	0.0990879	0	2	1	1	Intron (uc010qsq.1/57698, intron 1 of 17)	57698	ENSG00000187164	SHTN1	chr10	118862390	118863210
chr10|119436410|119437152	3.9322	5.65466	5.4042	6.37289	-0.696609	-0.172507	-0.237867	0.00302852	0.0730844	1	0	1	1	Distal Intergenic	196047	ENSG00000229847	EMX2OS	chr10	119436410	119437152
chr10|120031659|120032039	5.35643	7.71778	9.31563	11.2484	-1.07038	-0.543463	-0.271995	0.00531185	0.0861185	3	5	0	2	Distal Intergenic	63877	ENSG00000165669	FAM204A	chr10	120031659	120032039
chr10|120667208|120668452	4.15587	4.61167	5.71719	5.16341	-0.313174	-0.163035	0.146983	0.000695084	0.0606188	7	6	1	1	Distal Intergenic	340719	ENSG00000188613	NANOS1	chr10	120667208	120668452
chr10|120713784|120714261	4.37145	4.78936	5.52645	5.42727	-0.312114	-0.180393	0.0261257	0.00825592	0.0988243	4	5	1	0	Distal Intergenic	340719	ENSG00000188613	NANOS1	chr10	120713784	120714261
chr10|120914503|120915099	3.88797	2.85663	5.13227	4.28689	-0.140914	-0.585618	0.259665	0.000598953	0.0606188	4	5	3	0	Exon (uc001ldy.3/119559, exon 7 of 10)	119559	ENSG00000183605	SFXN4	chr10	120914503	120915099
chr10|121053149|121053467	4.30282	3.65982	5.80704	5.19196	-0.270996	-0.504507	0.161523	0.0084867	0.0996235	0	2	1	1	Intron (uc001led.3/2869, intron 1 of 15)	100616398	ENSG00000265719	MIR4681	chr10	121053149	121053467
chr10|121770299|121772187	7.74214	8.67233	6.84967	7.40388	0.0644512	0.228137	-0.112247	0.000268615	0.0606188	8	7	1	5	Distal Intergenic	100616322	ENSG00000265370	MIR4682	chr10	121770299	121772187
chr10|122203324|122203996	3.9867	4.39686	4.45564	4.79656	-0.266806	-0.125528	-0.106369	0.00639545	0.0912093	11	9	0	1	Distal Intergenic	196051	ENSG00000203805	PLPP4	chr10	122203324	122203996
chr10|122481331|122482598	2.15806	3.04951	2.08211	2.30586	-0.0955703	0.403273	-0.147263	0.00155119	0.0631758	4	6	2	2	Distal Intergenic	55717	ENSG00000120008	WDR11	chr10	122481331	122482598
chr10|122888037|122889666	3.3952	3.86157	3.33966	3.56772	-0.0715036	0.114184	-0.0952985	0.00131093	0.0616432	2	6	4	3	Distal Intergenic	55717	ENSG00000120008	WDR11	chr10	122888037	122889666
chr10|124252037|124252653	5.84766	7.00353	6.78704	7.32047	-0.324077	-0.0638534	-0.109153	0.00189933	0.0652682	5	5	0	2	Intron (uc001lgj.2/5654, intron 3 of 8)	5654	ENSG00000166033	HTRA1	chr10	124252037	124252653
chr10|125019137|125019586	5.20232	2.96112	4.99632	4.82113	0.109783	-0.703226	0.0514948	0.00569928	0.0879503	3	3	1	0	Distal Intergenic	9184	ENSG00000154473	BUB3	chr10	125019137	125019586
chr10|125307150|125307455	4.79418	6.21305	8.35229	7.01738	-0.549647	-0.175631	0.25124	0.000749443	0.0606188	1	2	0	1	Distal Intergenic	2849	ENSG00000154478	GPR26	chr10	125307150	125307455
chr10|125310188|125310905	4.73603	5.84444	6.7077	7.27792	-0.619846	-0.31646	-0.117707	0.00118088	0.0610486	2	2	3	1	Distal Intergenic	2849	ENSG00000154478	GPR26	chr10	125310188	125310905
chr10|125332830|125333422	4.64387	7.29592	7.31912	5.93064	-0.352862	0.298901	0.303483	0.00816683	0.0984975	5	8	0	2	Distal Intergenic	2849	ENSG00000154478	GPR26	chr10	125332830	125333422
chr10|125383442|125383822	4.30245	3.19394	5.62443	4.69732	-0.126677	-0.556501	0.259871	0.00100457	0.0606784	0	2	1	0	Distal Intergenic	2849	ENSG00000154478	GPR26	chr10	125383442	125383822
chr10|126164637|126167495	3.8302	4.67506	4.68055	4.12195	-0.105906	0.181659	0.183352	0.00815208	0.0984686	10	12	2	5	Intron (uc001lhs.2/64077, intron 1 of 6)	64077	ENSG00000107902	LHPP	chr10	126164637	126167495
chr10|126198331|126199563	4.16727	4.15992	5.55653	4.03752	0.045632	0.0430863	0.460715	0.00461136	0.0826146	2	4	4	0	Intron (uc001lhs.2/64077, intron 5 of 6)	64077	ENSG00000107902	LHPP	chr10	126198331	126199563
chr10|126391892|126392667	5.05093	7.78484	9.97035	10.1064	-1.00065	-0.376529	-0.019552	2.36461e-05	0.0606188	6	5	2	2	Exon (uc001lhx.3/uc001lhx.3, exon 1 of 2)	9679	ENSG00000189319	FAM53B	chr10	126391892	126392667
chr10|126537706|126539302	3.21181	3.38269	4.17622	4.20982	-0.390371	-0.315587	-0.0115602	0.00293317	0.0725899	9	7	1	1	Distal Intergenic	23172	ENSG00000165660	ABRAXAS2	chr10	126537706	126539302
chr10|126802406|126802793	5.37887	9.10717	11.0356	10.7273	-0.995917	-0.236219	0.040877	0.00360558	0.0766367	6	5	0	2	Intron (uc009yak.3/1488, intron 1 of 10)	1488	ENSG00000175029	CTBP2	chr10	126802406	126802793
chr10|127021621|127021888	4.53646	5.4714	7.29676	8.49946	-0.905804	-0.635461	-0.220116	0.00233552	0.0685748	1	0	0	1	Distal Intergenic	1488	ENSG00000175029	CTBP2	chr10	127021621	127021888
chr10|127220326|127220645	5.18109	6.22585	7.56338	8.18731	-0.660136	-0.39512	-0.114358	0.00251073	0.0697463	0	2	1	1	Distal Intergenic	100169752	ENSG00000237675	TEX36-AS1	chr10	127220326	127220645
chr10|127349852|127351216	4.22683	4.7503	5.95681	6.60173	-0.64327	-0.474825	-0.148305	0.00665574	0.0922538	8	9	2	3	Exon (uc001lij.3/387718, exon 2 of 4)	387718	ENSG00000175018	TEX36	chr10	127349852	127351216
chr10|12737797|12738394	4.42315	2.56058	4.63728	4.21832	0.0684059	-0.720201	0.136611	0.00822612	0.0986881	7	4	1	0	Intron (uc001iln.3/57118, intron 3 of 9)	100616151	ENSG00000263584	MIR4480	chr10	12737797	12738394
chr10|12740963|12741296	4.5018	2.14645	2.94365	4.40584	0.031087	-1.03746	-0.581812	0.00523755	0.0856361	3	4	1	0	Intron (uc001iln.3/57118, intron 3 of 9)	100616151	ENSG00000263584	MIR4480	chr10	12740963	12741296
chr10|127855159|127855838	2.72689	2.17857	1.65577	1.616	0.754831	0.430956	0.035075	0.00235162	0.0686528	4	8	2	1	Intron (uc001ljk.2/8038, intron 3 of 22)	92565	ENSG00000203780	FANK1	chr10	127855159	127855838
chr10|128274336|128275089	3.64356	5.34506	4.78764	4.80937	-0.4005	0.152358	-0.00653384	0.0049821	0.0845628	11	10	0	2	Intron (uc010qum.2/118611, intron 2 of 9)	118611	ENSG00000154493	C10orf90	chr10	128274336	128275089
chr10|128390387|128391013	5.87223	9.23033	7.92487	8.17143	-0.47668	0.175795	-0.0442005	0.0054413	0.0867582	4	3	2	2	Distal Intergenic	118611	ENSG00000154493	C10orf90	chr10	128390387	128391013
chr10|128997961|128998427	3.1013	3.13773	4.39151	4.18414	-0.432059	-0.41521	0.0697879	0.00626626	0.0907557	5	3	2	0	Intron (uc001ljt.3/1793, intron 27 of 51)	642938	ENSG00000188916	FAM196A	chr10	128997961	128998427
chr10|129152105|129152897	2.36172	2.79434	1.61135	1.40565	0.748599	0.991268	0.197033	0.00676521	0.0927523	2	8	0	3	Intron (uc001ljt.3/1793, intron 31 of 51)	1793	ENSG00000150760	DOCK1	chr10	129152105	129152897
chr10|130176831|130177775	2.22982	2.63773	1.53609	1.63073	0.45141	0.693781	-0.0862467	0.00320064	0.0740943	1	5	1	2	Distal Intergenic	4288	ENSG00000148773	MKI67	chr10	130176831	130177775
chr10|13025716|13026006	4.00244	2.74353	2.14746	2.64697	0.596536	0.0516911	-0.301714	0.00403905	0.0793141	0	2	0	0	Intron (uc001ilq.1/83643, intron 2 of 2)	83643	ENSG00000151468	CCDC3	chr10	13025716	13026006
chr10|130295939|130297173	3.23878	3.47979	2.11795	1.95532	0.728043	0.831592	0.115258	0.000591794	0.0606188	4	7	1	1	Distal Intergenic	4288	ENSG00000148773	MKI67	chr10	130295939	130297173
chr10|130576724|130577782	4.44305	6.28678	5.93791	5.84399	-0.395402	0.105369	0.0230029	0.00825592	0.0988243	6	7	1	2	Distal Intergenic	4288	ENSG00000148773	MKI67	chr10	130576724	130577782
chr10|130796315|130797050	1.98729	2.17345	1.1803	1.26029	0.657046	0.786229	-0.094603	0.00608972	0.0898586	0	5	0	0	Distal Intergenic	4255	ENSG00000170430	MGMT	chr10	130796315	130797050
chr10|130935294|130935948	5.2066	6.69582	7.77583	6.51047	-0.322421	0.0404998	0.256235	0.00391401	0.0784425	2	5	2	1	Distal Intergenic	4255	ENSG00000170430	MGMT	chr10	130935294	130935948
chr10|131213575|131214571	3.31109	4.08364	2.27719	2.38065	0.475951	0.778497	-0.0641032	0.0028021	0.0716802	2	5	2	3	Distal Intergenic	4255	ENSG00000170430	MGMT	chr10	131213575	131214571
chr10|131309078|131309384	8.43402	10.8464	13.9767	14.7234	-0.803824	-0.4409	-0.0750927	0.00332731	0.0747782	1	1	0	1	Intron (uc001lkh.2/4255, intron 1 of 4)	4255	ENSG00000170430	MGMT	chr10	131309078	131309384
chr10|131415845|131416302	5.63513	2.34492	3.86219	3.36103	0.745544	-0.519368	0.200512	0.000942646	0.0606188	3	4	3	0	Intron (uc001lkh.2/4255, intron 2 of 4)	4255	ENSG00000170430	MGMT	chr10	131415845	131416302
chr10|131586731|131587429	4.83948	6.7033	6.75047	6.28506	-0.377075	0.0929446	0.103061	0.00453642	0.0820866	0	4	1	1	Distal Intergenic	100422873	ENSG00000266676	MIR4297	chr10	131586731	131587429
chr10|132293650|132294427	3.43326	3.70222	2.10581	2.2124	0.633963	0.742776	-0.0712398	0.00042918	0.0606188	4	12	2	2	Distal Intergenic	10539	ENSG00000108010	GLRX3	chr10	132293650	132294427
chr10|132540346|132540770	2.84175	3.0482	1.87299	2.10823	0.430744	0.531922	-0.170694	0.00445052	0.0817499	0	3	1	1	Distal Intergenic	100422867	ENSG00000264803	MIR378C	chr10	132540346	132540770
chr10|132579758|132581186	3.09726	4.43463	4.31924	4.49096	-0.536028	-0.0182087	-0.056245	0.00473898	0.0832623	3	3	1	1	Distal Intergenic	100422867	ENSG00000264803	MIR378C	chr10	132579758	132581186
chr10|132929983|132930754	5.31621	6.36332	7.19366	9.73428	-0.872676	-0.613294	-0.436348	0.00532393	0.0861519	3	8	4	2	Intron (uc001lkp.3/256536, intron 8 of 11)	256536	ENSG00000176769	TCERG1L	chr10	132929983	132930754
chr10|132965080|132965419	6.14495	2.96225	4.76633	4.00251	0.618496	-0.434214	0.251973	0.0025501	0.0699659	2	2	1	0	Exon (uc001lkp.3/256536, exon 5 of 12)	256536	ENSG00000176769	TCERG1L	chr10	132965080	132965419
chr10|132975981|132977756	3.98029	5.58864	5.61397	5.86949	-0.56036	-0.0707383	-0.0642118	0.00205994	0.0665002	3	5	2	4	Intron (uc001lkp.3/256536, intron 4 of 11)	256536	ENSG00000176769	TCERG1L	chr10	132975981	132977756
chr10|133118913|133119237	5.70076	8.60646	8.48806	8.75202	-0.618462	-0.0241962	-0.044181	0.00142867	0.062351	0	4	1	1	Distal Intergenic	256536	ENSG00000176769	TCERG1L	chr10	133118913	133119237
chr10|133227849|133228202	4.49852	4.62706	2.92722	3.13527	0.520861	0.561508	-0.0990546	0.00416424	0.0800223	1	2	1	1	Distal Intergenic	256536	ENSG00000176769	TCERG1L	chr10	133227849	133228202
chr10|133297560|133297976	2.89753	2.57089	1.55491	1.61899	0.839724	0.667171	-0.0582689	0.00309285	0.0734222	1	3	1	1	Distal Intergenic	256536	ENSG00000176769	TCERG1L	chr10	133297560	133297976
chr10|134477136|134477672	5.01676	2.2072	3.87229	3.24478	0.628634	-0.555901	0.255066	0.00848286	0.0996071	2	7	1	0	Intron (uc001llo.1/3632, intron 4 of 12)	3632	ENSG00000068383	INPP5A	chr10	134477136	134477672
chr10|134740485|134741856	4.56302	7.28824	6.32381	6.01315	-0.398133	0.277451	0.0726752	0.00449531	0.0819097	6	6	0	2	Intron (uc021qbc.1/54777, intron 9 of 57)	54777	ENSG00000171811	CFAP46	chr10	134740485	134741856
chr10|135135774|135136124	4.61168	3.09009	5.7323	4.34137	0.0871413	-0.4905	0.400965	0.00754873	0.0959843	5	3	1	0	Intron (uc021qbf.1/118471, intron 4 of 7)	10844	ENSG00000130640	TUBGCP2	chr10	135135774	135136124
chr10|135182230|135182838	5.10249	4.13234	6.11234	4.94631	0.04485	-0.259394	0.305373	0.00230576	0.0683458	5	5	3	0	Promoter (2-3kb)	100500911	ENSG00000265395	MIR3944	chr10	135182230	135182838
chr10|13633883|13634298	5.30258	3.39713	6.17322	5.6669	-0.095864	-0.738243	0.123465	0.00846754	0.0995739	2	3	1	0	Intron (uc001imp.3/8559, intron 1 of 9)	8559	ENSG00000165630	PRPF18	chr10	13633883	13634298
chr10|1366464|1368095	3.32175	4.60551	4.67219	4.68843	-0.49716	-0.0257435	-0.00500714	0.00162486	0.063485	4	6	2	2	Intron (uc009xhq.3/105, intron 3 of 9)	105	ENSG00000185736	ADARB2	chr10	1366464	1368095
chr10|14232351|14232662	5.05304	5.63213	7.21554	6.87104	-0.443375	-0.286847	0.070579	0.00287214	0.0721171	0	1	0	1	Intron (uc001ims.3/55691, intron 2 of 24)	55691	ENSG00000151474	FRMD4A	chr10	14232351	14232662
chr10|1476440|1477995	4.87951	5.68158	6.48502	7.20781	-0.562824	-0.343269	-0.15245	0.0037618	0.0776896	4	6	3	4	Intron (uc009xhq.3/105, intron 1 of 9)	642394	ENSG00000205696	ADARB2-AS1	chr10	1476440	1477995
chr10|15780234|15780728	3.56481	4.6625	5.73504	6.63347	-0.895937	-0.508658	-0.209959	0.00647422	0.0915434	10	7	0	5	Distal Intergenic	8516	ENSG00000077943	ITGA8	chr10	15780234	15780728
chr10|17034786|17035035	4.24638	8.09698	7.23089	8.3571	-0.976769	-0.0456187	-0.20883	0.00456958	0.0823037	0	2	0	1	Intron (uc001ioo.3/8029, intron 28 of 66)	8029	ENSG00000107611	CUBN	chr10	17034786	17035035
chr10|22939306|22940633	1.9606	2.67616	2.89562	2.76825	-0.497681	-0.0488094	0.0648992	0.00314126	0.0737609	2	6	0	0	Intron (uc001irl.4/5305, intron 1 of 9)	5305	ENSG00000150867	PIP4K2A	chr10	22939306	22940633
chr10|24629206|24630624	2.61328	3.44867	3.63964	4.30576	-0.720405	-0.320229	-0.242472	0.000857987	0.0606188	11	4	0	2	Intron (uc001irs.3/56243, intron 3 of 18)	693188	ENSG00000207930	MIR603	chr10	24629206	24630624
chr10|25435470|25435816	4.45845	2.43058	5.61207	4.04996	0.138634	-0.736605	0.470625	0.00208464	0.066698	6	2	1	0	Distal Intergenic	57512	ENSG00000151025	GPR158	chr10	25435470	25435816
chr10|2561523|2561834	4.58234	2.13098	2.89765	2.45626	0.899619	-0.204948	0.238416	0.00525901	0.085821	0	3	0	1	Distal Intergenic	399708	#N/A	LINC00701	chr10	2561523	2561834
chr10|25854974|25855286	6.40643	7.92473	8.11513	11.3388	-0.823678	-0.516837	-0.482585	0.00843699	0.0993934	1	2	0	1	Intron (uc001isj.3/57512, intron 6 of 10)	57512	ENSG00000151025	GPR158	chr10	25854974	25855286
chr10|25994350|25994863	3.80235	2.01891	2.75761	2.54961	0.576614	-0.336703	0.11314	0.00474761	0.0832931	2	3	1	0	Intron (uc001isl.1/uc001isl.1, intron 1 of 2)	57512	ENSG00000151025	GPR158	chr10	25994350	25994863
chr10|26531036|26531401	3.39292	3.81299	2.03198	2.10993	0.685333	0.85373	-0.0543066	0.00262109	0.0704416	0	6	1	1	Intron (uc001isp.2/2572, intron 7 of 15)	2572	ENSG00000136750	GAD2	chr10	26531036	26531401
chr10|26548870|26549484	3.53016	3.42399	2.32016	2.2741	0.634437	0.590383	0.0289301	0.00585399	0.0888175	3	8	0	2	Intron (uc001isp.2/2572, intron 8 of 15)	2572	ENSG00000136750	GAD2	chr10	26548870	26549484
chr10|26764328|26765082	2.68881	2.36319	1.589	1.67479	0.682984	0.496753	-0.0758631	0.00238633	0.068995	5	12	2	0	Intron (uc001isr.3/54518, intron 2 of 4)	54518	ENSG00000077420	APBB1IP	chr10	26764328	26765082
chr10|27706920|27707295	5.9721	3.93173	7.95343	6.89968	-0.20829	-0.811364	0.205048	0.00637229	0.0910874	6	4	1	0	Distal Intergenic	374308	ENSG00000182077	PTCHD3	chr10	27706920	27707295
chr10|27968328|27968931	4.19036	4.17116	6.27445	7.70381	-0.878498	-0.885123	-0.296084	0.0052138	0.0855732	9	11	2	3	Intron (uc001itx.4/283078, intron 5 of 6)	283078	ENSG00000150051	MKX	chr10	27968328	27968931
chr10|28746158|28746987	2.51084	2.41847	3.76202	3.91968	-0.642563	-0.696638	-0.0592292	0.000168169	0.0606188	3	6	4	2	Distal Intergenic	220906	#N/A	WAC-AS1	chr10	28746158	28746987
chr10|29568798|29569094	5.29633	7.05041	7.36165	8.51817	-0.685552	-0.272837	-0.210514	0.00268787	0.0708547	1	1	0	1	Distal Intergenic	84569	ENSG00000120563	LYZL1	chr10	29568798	29569094
chr10|3038850|3039181	4.13963	3.02679	2.82326	2.68511	0.624523	0.17281	0.0723822	0.00566574	0.0878406	0	2	1	1	Distal Intergenic	5214	ENSG00000067057	PFKP	chr10	3038850	3039181
chr10|30997850|30998232	4.18514	2.26166	4.17424	3.25214	0.363888	-0.524007	0.360125	0.00194965	0.0655559	3	4	1	0	Exon (uc010qdx.1/uc010qdx.1, exon 8 of 10)	119180	ENSG00000151033	LYZL2	chr10	30997850	30998232
chr10|31907300|31908174	3.63084	4.48364	5.21575	5.89164	-0.698366	-0.394	-0.175796	0.00171377	0.0642197	5	5	0	3	Distal Intergenic	94134	ENSG00000165322	ARHGAP12	chr10	31907300	31908174
chr10|32679502|32679879	3.67002	5.70992	6.53437	7.27943	-0.988037	-0.350355	-0.155777	0.00356632	0.0763884	5	0	1	2	Distal Intergenic	80314	ENSG00000120616	EPC1	chr10	32679502	32679879
chr10|33161603|33161873	6.11813	9.05272	9.77893	9.87694	-0.690973	-0.125712	-0.0143872	0.00310701	0.0735547	1	2	0	1	Intron (uc001iwl.1/79741, intron 22 of 22)	3688	ENSG00000150093	ITGB1	chr10	33161603	33161873
chr10|34157875|34158174	4.80966	4.20599	7.19019	6.99198	-0.539764	-0.733255	0.0403287	0.00242266	0.0690791	0	2	0	0	Distal Intergenic	100505583	ENSG00000261683	LINC00838	chr10	34157875	34158174
chr10|34344592|34345491	2.13234	1.95651	1.52683	1.55178	0.458513	0.334356	-0.0233893	0.00679286	0.0929053	2	6	1	0	Distal Intergenic	100505583	ENSG00000261683	LINC00838	chr10	34344592	34345491
chr10|3518940|3519241	6.24283	2.69166	4.03317	3.51984	0.826691	-0.38701	0.196404	0.00127523	0.0614912	0	3	0	0	Intron (uc001igy.1/uc001igy.1, intron 1 of 1)	10531	ENSG00000107959	PITRM1	chr10	3518940	3519241
chr10|37415897|37416264	6.2945	4.2496	9.43605	6.91641	-0.135933	-0.702699	0.448159	0.00683918	0.093083	7	3	1	0	Promoter (1-2kb)	91074	ENSG00000148513	ANKRD30A	chr10	37415897	37416264
chr10|38730937|38731710	3.27501	3.03397	4.13838	4.82864	-0.56012	-0.670412	-0.222553	0.00169732	0.064058	3	5	3	0	Intron (uc009xme.3/399744, intron 5 of 7)	399744	#N/A	LINC00999	chr10	38730937	38731710
chr10|408921|409287	5.44152	2.20818	4.84525	2.80107	0.958031	-0.343123	0.790593	0.00156192	0.0632277	5	4	1	0	Exon (uc001ifp.3/22982, exon 21 of 37)	22982	ENSG00000151240	DIP2C	chr10	408921	409287
chr10|43150932|43151301	5.73975	7.16107	8.37624	8.37765	-0.545559	-0.226372	-0.000244036	0.00785178	0.0972677	5	1	1	1	Distal Intergenic	7582	ENSG00000196693	ZNF33B	chr10	43150932	43151301
chr10|44247025|44247508	4.37813	2.2724	3.56532	2.24739	0.962066	0.0159707	0.665784	0.00842936	0.0993934	5	5	1	0	Distal Intergenic	10151	#N/A	HNRNPA3P1	chr10	44247025	44247508
chr10|44909923|44910285	6.02359	3.622	7.05402	5.01118	0.265475	-0.468362	0.493297	0.00393548	0.0785836	3	1	1	0	Distal Intergenic	6387	ENSG00000107562	CXCL12	chr10	44909923	44910285
chr10|45176197|45176841	4.71928	2.03001	2.80342	2.85509	0.725029	-0.492048	-0.0263503	0.00122518	0.0612161	3	6	2	0	Distal Intergenic	643236	ENSG00000187783	TMEM72	chr10	45176197	45176841
chr10|45575797|45576103	3.73088	3.40827	7.60132	7.42759	-0.993379	-1.12386	0.0333546	1.71774e-05	0.0606188	1	2	0	0	Distal Intergenic	100133308	#N/A	RSU1P2	chr10	45575797	45576103
chr10|45798901|45800226	3.9627	4.67387	5.79606	5.33464	-0.428907	-0.190771	0.119682	0.00306892	0.0732907	7	10	3	4	Promoter (2-3kb)	79290	ENSG00000256574	OR13A1	chr10	45798901	45800226
chr10|48578949|48579323	6.47713	6.39375	9.59883	9.14599	-0.497785	-0.516478	0.069719	0.00192124	0.0653538	3	3	1	0	Distal Intergenic	2662	ENSG00000266524	GDF10	chr10	48578949	48579323
chr10|48643080|48644033	3.19537	4.10299	4.68758	4.42573	-0.469935	-0.109239	0.0829267	0.000198657	0.0606188	2	4	0	1	Distal Intergenic	26095	ENSG00000204179	PTPN20	chr10	48643080	48644033
chr10|50164667|50165352	5.46802	3.64648	6.47117	4.4163	0.30818	-0.276331	0.551191	0.00453849	0.0820967	4	3	3	1	Exon (uc001jha.4/57705, exon 52 of 62)	57705	ENSG00000128815	WDFY4	chr10	50164667	50165352
chr10|50266446|50266831	6.0307	6.71542	9.29966	11.4598	-0.926189	-0.771038	-0.301338	0.00255244	0.0700182	3	5	0	2	Intron (uc001jhf.2/196740, intron 5 of 7)	196740	ENSG00000165633	VSTM4	chr10	50266446	50266831
chr10|50748207|50748761	3.11178	2.93287	2.41702	2.12215	0.552214	0.466786	0.187702	0.00474761	0.0832931	4	10	1	0	Promoter (<=1kb)	101243544	#N/A	#N/A	chr10	50748207	50748761
chr10|50857635|50858298	4.68563	7.56527	6.56537	6.7035	-0.51667	0.174478	-0.0300364	0.00350982	0.0760841	6	8	2	4	Exon (uc001jhv.1/1103, exon 10 of 15)	282966	ENSG00000178645	C10orf53	chr10	50857635	50858298
chr10|52461451|52461854	4.73988	2.26944	5.13917	3.14988	0.589556	-0.472957	0.70624	0.00290781	0.0723237	7	8	1	0	Distal Intergenic	653308	ENSG00000204147	ASAH2B	chr10	52461451	52461854
chr10|53028319|53028719	2.63254	1.70741	1.471	1.77146	0.571514	-0.0531293	-0.268144	0.00823356	0.0987628	3	3	1	0	Intron (uc010qhp.2/5592, intron 2 of 2)	693190	ENSG00000207813	MIR605	chr10	53028319	53028719
chr10|5472497|5472929	5.1245	2.13178	4.37063	4.38712	0.224136	-1.04121	-0.0054323	0.00507814	0.0849683	2	3	1	0	Intron (uc001iia.4/10276, intron 3 of 11)	10276	ENSG00000173848	NET1	chr10	5472497	5472929
chr10|55228230|55228619	4.13807	5.21632	6.67833	8.6297	-1.06035	-0.72628	-0.369823	0.00548597	0.0870035	2	2	1	0	Distal Intergenic	4153	ENSG00000165471	MBL2	chr10	55228230	55228619
chr10|56229825|56230643	2.71645	4.29515	3.71135	4.85409	-0.837475	-0.17649	-0.387255	0.00214375	0.0670838	8	7	0	3	Intron (uc010qhq.2/65217, intron 4 of 34)	65217	ENSG00000150275	PCDH15	chr10	56229825	56230643
chr10|57052232|57052991	3.47432	2.62913	2.23414	2.61594	0.409403	0.00726073	-0.227607	0.00580636	0.088584	3	9	0	2	Intron (uc001jjv.1/65217, intron 2 of 20)	100463289	ENSG00000249860	MTRNR2L5	chr10	57052232	57052991
chr10|57170394|57170901	5.67352	9.03108	9.58231	10.5086	-0.889252	-0.218597	-0.133121	0.00351302	0.0760841	8	7	1	3	Intron (uc001jjv.1/65217, intron 2 of 20)	100463289	ENSG00000249860	MTRNR2L5	chr10	57170394	57170901
chr10|58671005|58671308	4.52089	3.5611	6.033	5.91724	-0.388316	-0.732601	0.0279526	0.00216449	0.067135	0	3	0	0	Distal Intergenic	100500834	ENSG00000264747	MIR3924	chr10	58671005	58671308
chr10|58816343|58817113	3.73193	3.68664	4.55604	4.85156	-0.378529	-0.396144	-0.0906674	0.0069674	0.0936233	3	7	1	0	Distal Intergenic	100500834	ENSG00000264747	MIR3924	chr10	58816343	58817113
chr10|60235135|60235483	5.73148	7.26045	10.732	12.8052	-1.15975	-0.818595	-0.254803	2.53458e-05	0.0606188	4	2	1	1	Distal Intergenic	80114	ENSG00000122870	BICC1	chr10	60235135	60235483
chr10|6087481|6087951	3.20662	3.08	1.90379	2.08425	0.621522	0.563401	-0.130659	0.00836107	0.0992504	8	12	1	1	Intron (uc001iiz.2/3559, intron 1 of 7)	3559	ENSG00000134460	IL2RA	chr10	6087481	6087951
chr10|6112110|6112774	3.81047	2.90779	2.23505	2.56882	0.568865	0.178818	-0.200799	0.004134	0.0798678	2	6	3	1	Distal Intergenic	3559	ENSG00000134460	IL2RA	chr10	6112110	6112774
chr10|62116371|62116744	5.36711	3.4519	7.16028	5.57016	-0.0535746	-0.690328	0.362297	0.007231	0.0947574	6	2	1	0	Intron (uc001jky.3/288, intron 1 of 43)	288	ENSG00000151150	ANK3	chr10	62116371	62116744
chr10|62648307|62648929	3.39274	2.63257	4.82443	3.04176	0.157546	-0.208437	0.66545	0.00308579	0.0733986	6	3	1	0	Exon (uc009xpe.2/9886, exon 4 of 9)	9886	ENSG00000072422	RHOBTB1	chr10	62648307	62648929
chr10|63307976|63308618	5.8826	7.30695	8.50975	9.2287	-0.649675	-0.336859	-0.117011	0.00263793	0.0705373	0	3	4	4	Distal Intergenic	219623	ENSG00000196932	TMEM26	chr10	63307976	63308618
chr10|63615727|63616043	4.09904	4.11483	5.64134	5.59913	-0.449916	-0.444372	0.0108342	0.00595312	0.0892726	1	3	1	0	Distal Intergenic	84159	ENSG00000150347	ARID5B	chr10	63615727	63616043
chr10|63668481|63669179	3.19937	2.41862	3.0883	4.19069	-0.3894	-0.793004	-0.440372	0.00716906	0.0944304	9	8	3	0	Intron (uc010qil.2/84159, intron 2 of 4)	84159	ENSG00000150347	ARID5B	chr10	63668481	63669179
chr10|64967382|64967728	6.08006	4.91181	8.76249	8.1362	-0.42027	-0.7281	0.106986	0.00620686	0.0904879	1	2	1	1	Promoter (<=1kb)	221037	ENSG00000171988	JMJD1C	chr10	64967382	64967728
chr10|65723121|65723467	4.06089	3.12817	6.68195	5.81873	-0.518908	-0.895386	0.199565	0.00207321	0.0665798	3	5	1	0	Distal Intergenic	221035	ENSG00000165476	REEP3	chr10	65723121	65723467
chr10|667049|667790	3.08306	3.94753	2.26625	1.86699	0.723649	1.08024	0.27959	0.00363531	0.0769233	5	14	0	2	Intron (uc001ifp.3/22982, intron 1 of 36)	100847086	ENSG00000263511	MIR5699	chr10	667049	667790
chr10|66813276|66814455	3.666	4.47485	5.01457	5.18102	-0.499031	-0.211397	-0.0471099	0.00442829	0.081534	5	9	3	0	Distal Intergenic	305	#N/A	ANXA2P3	chr10	66813276	66814455
chr10|6697158|6697613	4.25855	3.18497	2.19844	2.52805	0.75234	0.333256	-0.201545	0.00458624	0.0824494	3	7	4	2	Distal Intergenic	439949	#N/A	PRKCQ-AS1	chr10	6697158	6697613
chr10|6814540|6814982	5.29823	2.33826	2.45417	2.65999	0.994086	-0.18599	-0.116189	0.000942212	0.0606188	3	10	3	1	Distal Intergenic	100507127	ENSG00000238266	LINC00707	chr10	6814540	6814982
chr10|68793619|68793979	4.34047	3.78005	5.29455	6.22428	-0.520055	-0.719502	-0.233398	0.00467048	0.0829058	2	1	1	0	Intron (uc001jmz.1/347731, intron 2 of 2)	347731	ENSG00000198739	LRRTM3	chr10	68793619	68793979
chr10|69361003|69361287	5.3346	4.62358	7.39782	6.98271	-0.388405	-0.594775	0.0833139	0.00548597	0.0870035	1	1	0	0	Intron (uc009xpn.1/29119, intron 3 of 17)	29119	ENSG00000183230	CTNNA3	chr10	69361003	69361287
chr10|70403752|70404086	4.66346	4.24558	6.69872	6.40823	-0.458525	-0.593964	0.0639585	0.00614244	0.0901237	2	1	1	0	Intron (uc001jok.4/80312, intron 3 of 11)	80312	ENSG00000138336	TET1	chr10	70403752	70404086
chr10|71072941|71073542	3.59997	1.97254	2.9034	2.56364	0.489791	-0.378135	0.179553	0.00853284	0.0998173	6	6	1	0	Promoter (2-3kb)	3098	ENSG00000156515	HK1	chr10	71072941	71073542
chr10|7209559|7209956	5.28523	2.36204	5.03881	3.62127	0.545472	-0.61646	0.476588	0.00205711	0.0665002	5	9	1	0	Intron (uc009xio.2/57713, intron 20 of 20)	57713	ENSG00000198879	SFMBT2	chr10	7209559	7209956
chr10|72411970|72414118	2.55061	3.30522	3.59366	3.68399	-0.530429	-0.156521	-0.0358167	0.00467686	0.0829875	5	3	3	3	Distal Intergenic	140766	ENSG00000138316	ADAMTS14	chr10	72411970	72414118
chr10|7290672|7291100	4.28001	1.86709	3.69978	2.50703	0.771637	-0.425191	0.56146	0.00458207	0.0824288	3	8	2	0	Intron (uc009xio.2/57713, intron 7 of 20)	57713	ENSG00000198879	SFMBT2	chr10	7290672	7291100
chr10|73091653|73092001	5.42744	5.10412	7.48033	6.71771	-0.307699	-0.396309	0.155131	0.00566832	0.0878406	5	4	1	0	Intron (uc001jrr.4/55315, intron 2 of 5)	55315	ENSG00000198246	SLC29A3	chr10	73091653	73092001
chr10|7329200|7330138	3.80553	2.01046	2.07071	2.28446	0.736246	-0.184329	-0.141727	0.00418707	0.0801921	1	8	2	0	Intron (uc009xio.2/57713, intron 4 of 20)	57713	ENSG00000198879	SFMBT2	chr10	7329200	7330138
chr10|73518042|73518888	2.16892	2.95955	2.46774	2.77449	-0.355247	0.0931532	-0.169036	0.00659568	0.091991	3	3	1	2	Intron (uc001jrx.4/64072, intron 36 of 67)	64115	ENSG00000107738	VSIR	chr10	73518042	73518888
chr10|73816675|73817756	4.93786	7.19481	6.58836	5.28675	-0.0984953	0.444575	0.317538	0.00388911	0.0784148	1	5	3	4	Intron (uc021psn.1/119504, intron 1 of 3)	9806	ENSG00000107742	SPOCK2	chr10	73816675	73817756
chr10|73912953|73913278	5.50144	2.92651	5.66061	4.11158	0.420115	-0.490512	0.461262	0.00834597	0.099237	0	2	1	0	Intron (uc021psn.1/119504, intron 1 of 3)	51008	ENSG00000138303	ASCC1	chr10	73912953	73913278
chr10|7502663|7503140	3.41225	1.77952	2.1945	2.35193	0.536878	-0.402356	-0.0999566	0.0025712	0.0700681	5	12	2	0	Distal Intergenic	57713	ENSG00000198879	SFMBT2	chr10	7502663	7503140
chr10|75240293|75241156	2.39852	2.39191	1.49982	1.845	0.378526	0.374547	-0.298832	0.0032021	0.0740943	0	8	0	1	Intron (uc001jue.3/5532, intron 1 of 13)	5532	ENSG00000107758	PPP3CB	chr10	75240293	75241156
chr10|7558369|7558693	4.86068	1.92204	2.658	2.74221	0.82582	-0.512699	-0.0449966	0.00740659	0.0953269	0	3	0	0	Distal Intergenic	80760	ENSG00000123243	ITIH5	chr10	7558369	7558693
chr10|7656553|7656934	4.33644	2.44599	1.74391	2.06273	1.07196	0.245863	-0.242226	0.00219244	0.0673383	3	9	1	1	Intron (uc021pmu.1/80760, intron 3 of 10)	80760	ENSG00000123243	ITIH5	chr10	7656553	7656934
chr10|76816781|76817139	5.423	2.02875	3.55527	3.0231	0.843064	-0.575438	0.233929	0.004791	0.0835921	3	2	1	0	Promoter (1-2kb)	338599	ENSG00000188716	DUPD1	chr10	76816781	76817139
chr10|78011102|78011942	4.62045	4.78872	5.56167	6.43545	-0.478006	-0.426401	-0.210523	0.00139299	0.0622804	3	9	3	0	Intron (uc001jxi.3/83938, intron 4 of 5)	83938	ENSG00000148655	LRMDA	chr10	78011102	78011942
chr10|79780950|79781363	5.15423	3.12265	5.66432	4.48745	0.199859	-0.523127	0.336005	0.00849437	0.0996441	6	7	0	0	Exon (uc001jzn.3/11128, exon 8 of 31)	11128	ENSG00000148606	POLR3A	chr10	79780950	79781363
chr10|80730130|80731065	3.08382	2.52857	1.8497	1.99949	0.625087	0.338689	-0.112344	0.00640706	0.0912093	1	5	2	0	Intron (uc001jzx.3/283050, intron 4 of 7)	283050	ENSG00000224596	ZMIZ1-AS1	chr10	80730130	80731065
chr10|80741507|80742613	6.99439	4.74628	6.29914	5.29484	0.401611	-0.157791	0.250568	0.00565033	0.087777	7	5	4	0	Intron (uc001jzx.3/283050, intron 4 of 7)	283050	ENSG00000224596	ZMIZ1-AS1	chr10	80741507	80742613
chr10|80980694|80981252	1.83943	3.05398	3.50432	3.68333	-1.00175	-0.270323	-0.0718775	0.00052862	0.0606188	0	3	0	1	Intron (uc001kaf.2/57178, intron 7 of 24)	57178	ENSG00000108175	ZMIZ1	chr10	80980694	80981252
chr10|8125103|8126413	1.94616	2.10601	2.94835	2.90773	-0.57926	-0.465382	0.0200164	0.00368539	0.0771143	7	6	0	0	Distal Intergenic	2625	ENSG00000107485	GATA3	chr10	8125103	8126413
chr10|82002031|82002480	5.68777	6.87266	6.83348	8.88053	-0.642782	-0.369778	-0.378026	0.00423309	0.0804746	1	2	1	1	Distal Intergenic	439990	ENSG00000237523	LINC00857	chr10	82002031	82002480
chr10|82331246|82332835	4.31717	4.36402	5.34293	4.74238	-0.135523	-0.119953	0.172021	0.00239948	0.068995	6	5	3	0	Exon (uc001kck.1/387694, exon 3 of 7)	387694	ENSG00000178217	SH2D4B	chr10	82331246	82332835
chr10|82954237|82954566	5.39685	4.56581	7.41919	8.16817	-0.597894	-0.839143	-0.138751	0.00107449	0.060705	2	3	1	0	Distal Intergenic	387694	ENSG00000178217	SH2D4B	chr10	82954237	82954566
chr10|8342531|8342965	3.67137	4.47556	4.95978	6.04925	-0.720439	-0.434687	-0.286478	0.00184099	0.0647747	0	2	1	0	Distal Intergenic	2625	ENSG00000107485	GATA3	chr10	8342531	8342965
chr10|85810829|85811254	4.10795	5.26485	6.19005	7.57448	-0.88273	-0.524756	-0.291196	0.00633771	0.0909591	2	9	0	4	Distal Intergenic	27069	ENSG00000165678	GHITM	chr10	85810829	85811254
chr10|86023483|86024062	5.01176	4.97971	5.97301	6.36325	-0.344447	-0.353702	-0.0913072	0.0055461	0.0873256	4	5	2	0	Distal Intergenic	170425	ENSG00000229404	LINC00858	chr10	86023483	86024062
chr10|87538944|87539713	5.51707	4.73578	2.41155	2.80582	0.975481	0.75518	-0.218459	0.000841518	0.0606188	4	8	2	3	Intron (uc010qmf.1/2894, intron 1 of 8)	2894	ENSG00000182771	GRID1	chr10	87538944	87539713
chr10|87939938|87940531	2.30684	2.66134	1.53577	1.39051	0.730306	0.936538	0.143349	0.00187079	0.0650322	5	10	0	2	Intron (uc001kdl.1/2894, intron 3 of 15)	442911	ENSG00000199104	MIR346	chr10	87939938	87940531
chr10|87970001|87970725	3.52328	2.82913	2.24433	2.00112	0.816114	0.49955	0.165479	0.00614802	0.0901853	4	5	2	1	Intron (uc001kdl.1/2894, intron 2 of 15)	442911	ENSG00000199104	MIR346	chr10	87970001	87970725
chr10|88060528|88060927	3.73182	2.71403	1.69683	1.90178	0.972526	0.513088	-0.164507	0.000285466	0.0606188	0	4	0	1	Intron (uc001kdl.1/2894, intron 2 of 15)	442911	ENSG00000199104	MIR346	chr10	88060528	88060927
chr10|88503266|88503580	3.84466	3.78345	4.56491	5.0109	-0.382213	-0.405366	-0.134484	0.00669203	0.0924081	0	4	0	0	Distal Intergenic	657	ENSG00000107779	BMPR1A	chr10	88503266	88503580
chr10|8873859|8874787	2.7779	2.99746	3.38343	3.7344	-0.426879	-0.317136	-0.142388	0.00434639	0.0810536	9	7	0	0	Distal Intergenic	2625	ENSG00000107485	GATA3	chr10	8873859	8874787
chr10|88971901|88972550	4.60646	2.69231	4.455	3.58175	0.362991	-0.411821	0.31476	0.006689	0.0924081	0	4	3	0	Intron (uc009xtc.2/728190, intron 5 of 5)	728118	ENSG00000184923	NUTM2A	chr10	88971901	88972550
chr10|89150637|89152457	2.71794	3.38327	2.95724	3.12208	-0.199992	0.115911	-0.0782554	0.00583013	0.0886787	3	7	2	3	Distal Intergenic	728218	ENSG00000228055	LINC00864	chr10	89150637	89152457
chr10|89751945|89752269	3.53726	3.15808	4.57126	5.49387	-0.635191	-0.798774	-0.265232	0.0014267	0.062351	0	4	1	0	Distal Intergenic	5728	ENSG00000171862	PTEN	chr10	89751945	89752269
chr10|90003908|90004110	3.69838	6.53504	6.88726	7.73969	-1.06538	-0.244081	-0.168346	0.00724083	0.0948216	0	2	0	0	Intron (uc010qms.1/55328, intron 5 of 5)	55328	ENSG00000184719	RNLS	chr10	90003908	90004110
chr10|90011989|90012384	7.47066	8.14539	14.7385	10.737	-0.52329	-0.398541	0.45699	0.00596123	0.0892726	7	5	0	3	Intron (uc010qms.1/55328, intron 5 of 5)	55328	ENSG00000184719	RNLS	chr10	90011989	90012384
chr10|90711464|90712685	2.32469	4.44899	4.27472	4.38607	-0.915888	0.0205493	-0.0370998	7.35551e-05	0.0606188	0	2	0	5	Promoter (<=1kb)	59	ENSG00000107796	ACTA2	chr10	90711464	90712685
chr10|91389944|91390344	5.55892	2.02863	4.12632	3.47368	0.67834	-0.775963	0.248389	0.00834597	0.099237	8	6	1	0	Intron (uc001kgn.2/53354, intron 1 of 6)	53354	ENSG00000152782	PANK1	chr10	91389944	91390344
chr10|91462948|91464407	2.62574	3.11432	3.74416	3.60774	-0.458371	-0.21218	0.053546	0.00349862	0.0760146	2	1	3	0	Promoter (1-2kb)	9585	ENSG00000138182	KIF20B	chr10	91462948	91464407
chr10|91838738|91839075	5.36671	5.2757	6.71151	7.59838	-0.501654	-0.52633	-0.179055	0.00821126	0.0986837	2	5	1	1	Distal Intergenic	643529	ENSG00000232229	LINC00865	chr10	91838738	91839075
chr10|92175525|92175803	5.90239	7.98328	9.31055	12.9838	-1.13735	-0.701665	-0.47978	7.7651e-05	0.0606188	1	1	0	1	Distal Intergenic	3363	ENSG00000148680	HTR7	chr10	92175525	92175803
chr10|92937043|92938309	2.59377	3.02386	3.51622	3.03622	-0.227225	-0.00588236	0.211753	0.00621813	0.0905648	10	4	1	0	Intron (uc001khg.4/84333, intron 1 of 2)	84333	ENSG00000180628	PCGF5	chr10	92937043	92938309
chr10|93347662|93347944	5.95607	6.89194	9.01601	10.2324	-0.780718	-0.57017	-0.18259	0.0034322	0.0755459	2	1	0	0	Intron (uc010qnl.2/100188947, intron 1 of 4)	100188947	#N/A	HECTD2-AS1	chr10	93347662	93347944
chr10|93504614|93505061	3.87463	5.37637	5.87619	5.80468	-0.58316	-0.110585	0.0176635	0.00209518	0.0667607	0	1	0	1	Distal Intergenic	80351	ENSG00000107854	TNKS2	chr10	93504614	93505061
chr10|93609842|93610585	2.66017	2.71823	3.44679	3.2357	-0.282558	-0.251412	0.091176	0.00834597	0.099237	3	2	1	0	Intron (uc001khp.3/80351, intron 20 of 26)	80351	ENSG00000107854	TNKS2	chr10	93609842	93610585
chr10|93611907|93612242	3.53773	3.01935	4.71923	4.70013	-0.409877	-0.638462	0.00584961	0.00427962	0.0807344	2	1	1	0	Intron (uc001khp.3/80351, intron 21 of 26)	80351	ENSG00000107854	TNKS2	chr10	93611907	93612242
chr10|94438081|94438425	3.21551	2.45627	4.40467	4.26502	-0.407506	-0.796083	0.0464824	0.00537497	0.0864289	1	1	1	0	Distal Intergenic	3087	ENSG00000152804	HHEX	chr10	94438081	94438425
chr10|94980267|94981481	4.2125	5.68249	5.54535	5.8371	-0.470573	-0.0387279	-0.0739732	0.00531426	0.0861363	4	7	4	2	Distal Intergenic	1592	ENSG00000095596	CYP26A1	chr10	94980267	94981481
chr10|95032204|95033242	2.72825	3.87694	3.84079	4.21578	-0.62782	-0.12088	-0.134395	0.00715608	0.0943698	6	5	0	1	Distal Intergenic	26509	ENSG00000138119	MYOF	chr10	95032204	95033242
chr10|95090467|95091425	2.82171	4.92249	4.30045	4.93243	-0.805728	-0.00291045	-0.197809	0.00602377	0.0895769	6	3	1	0	Intron (uc009xue.3/26509, intron 25 of 34)	26509	ENSG00000138119	MYOF	chr10	95090467	95091425
chr10|95375230|95375655	4.69532	6.48414	6.11706	7.18485	-0.613734	-0.148041	-0.232119	0.00770749	0.0965715	6	6	2	2	Promoter (2-3kb)	5146	ENSG00000095464	PDE6C	chr10	95375230	95375655
chr10|95464616|95465548	1.63369	2.33868	2.10408	2.10229	-0.363824	0.15373	0.0012242	0.00169343	0.0639922	1	4	0	1	Promoter (1-2kb)	118924	ENSG00000148690	FRA10AC1	chr10	95464616	95465548
chr10|95580763|95581054	3.96356	4.28608	6.39902	8.39889	-1.0834	-0.97054	-0.392347	6.52616e-05	0.0606188	1	2	0	0	Distal Intergenic	9211	ENSG00000108231	LGI1	chr10	95580763	95581054
chr10|95759144|95759565	4.87788	7.3668	9.41451	12.9852	-1.41255	-0.817761	-0.463913	0.000395928	0.0606188	6	3	1	4	Intron (uc001kjk.3/51196, intron 1 of 32)	51196	ENSG00000138193	PLCE1	chr10	95759144	95759565
chr10|96053341|96053722	6.15727	6.90782	9.17496	11.8822	-0.948439	-0.7825	-0.373029	0.00529979	0.0860127	9	6	0	2	Exon (uc001kjk.3/51196, exon 23 of 33)	100128054	ENSG00000268894	PLCE1-AS1	chr10	96053341	96053722
chr10|97115816|97116144	4.70837	3.89117	6.36294	4.04996	0.217321	-0.0577043	0.651787	0.00786244	0.0973005	1	2	1	0	Exon (uc021pwm.1/uc021pwm.1, exon 1 of 1)	10580	ENSG00000095637	SORBS1	chr10	97115816	97116144
chr10|98077915|98078254	5.38352	4.30352	8.18825	6.73335	-0.322774	-0.645806	0.282232	0.000452457	0.0606188	2	1	1	0	Exon (uc001kmf.3/1791, exon 2 of 11)	1791	ENSG00000107447	DNTT	chr10	98077915	98078254
chr10|98339901|98340184	4.19553	4.22333	6.12134	4.7512	-0.179441	-0.16991	0.365556	0.00114079	0.0609814	0	2	0	1	Intron (uc001kmm.4/56889, intron 1 of 14)	56889	ENSG00000077147	TM9SF3	chr10	98339901	98340184
chr10|98783621|98784069	3.51602	5.94066	7.11828	7.37301	-1.06831	-0.311631	-0.0507263	0.00240278	0.068995	8	8	1	4	Intron (uc001kmw.2/6585, intron 25 of 36)	26148	#N/A	#N/A	chr10	98783621	98784069
chr10|99511157|99511443	5.29819	5.96957	7.88981	6.45568	-0.285067	-0.112942	0.289423	0.00339791	0.0752956	0	2	0	1	Exon (uc001kok.2/118813, exon 8 of 11)	118813	ENSG00000155256	ZFYVE27	chr10	99511157	99511443
chr10|99621507|99621865	6.0754	10.1421	10.6244	11.0908	-0.868309	-0.128997	-0.0619841	0.00152084	0.0630406	4	2	1	1	Intron (uc001kos.3/401647, intron 2 of 4)	401647	ENSG00000155265	GOLGA7B	chr10	99621507	99621865
chr1|100409173|100409442	4.32138	4.24398	7.36696	6.94095	-0.68364	-0.709716	0.0859373	0.00223709	0.0676542	1	2	0	1	Distal Intergenic	23443	ENSG00000117620	SLC35A3	chr1	100409173	100409442
chr1|100706195|100706489	4.56376	1.7783	3.5357	3.44808	0.404431	-0.955296	0.0362045	0.00671634	0.0925404	1	2	0	0	5' UTR	1629	ENSG00000137992	DBT	chr1	100706195	100706489
chr1|10119069|10119555	2.5503	2.24462	1.7107	1.53445	0.732948	0.548752	0.156866	0.00775997	0.0968429	3	3	1	1	Intron (uc001aqr.4/10277, intron 1 of 26)	10277	ENSG00000130939	UBE4B	chr1	10119069	10119555
chr1|101834827|101835656	2.7865	3.89166	3.68139	4.12319	-0.565309	-0.0833762	-0.163513	0.0020524	0.0664751	2	4	1	1	Distal Intergenic	100873740	#N/A	RNU6-31P	chr1	101834827	101835656
chr1|102155068|102155405	5.26661	3.57875	6.68389	6.91013	-0.391838	-0.949257	-0.0480243	0.00523755	0.0856361	2	3	1	0	Distal Intergenic	118427	ENSG00000118733	OLFM3	chr1	102155068	102155405
chr1|102252446|102252772	5.02174	3.45912	6.44805	5.54388	-0.142708	-0.68049	0.217968	0.00137834	0.0621205	0	2	1	0	Distal Intergenic	118427	ENSG00000118733	OLFM3	chr1	102252446	102252772
chr1|103124787|103127170	2.90976	3.32266	3.53237	3.69029	-0.342831	-0.151395	-0.0630973	0.00267805	0.0707214	4	11	2	1	Distal Intergenic	1301	ENSG00000060718	COL11A1	chr1	103124787	103127170
chr1|103572102|103572380	6.47074	8.83187	9.93747	13.1813	-1.02648	-0.577697	-0.407538	0.00484359	0.0839138	2	2	0	1	Promoter (1-2kb)	1301	ENSG00000060718	COL11A1	chr1	103572102	103572380
chr1|10361140|10361533	4.2009	1.72311	2.3284	2.66266	0.657828	-0.627858	-0.193529	0.00567089	0.0878579	3	8	1	0	Intron (uc001aqv.4/23095, intron 20 of 20)	23095	ENSG00000054523	KIF1B	chr1	10361140	10361533
chr1|105217929|105218330	5.17493	7.1383	7.05211	9.86172	-0.930302	-0.466259	-0.483784	0.00711086	0.0941763	4	3	1	2	Distal Intergenic	100129138	ENSG00000215869	LOC100129138	chr1	105217929	105218330
chr1|105681213|105681504	4.00964	4.34516	5.79518	7.35927	-0.87609	-0.760154	-0.344708	0.00422731	0.0804746	0	2	0	0	Distal Intergenic	100129138	ENSG00000215869	LOC100129138	chr1	105681213	105681504
chr1|106255158|106255879	4.52566	3.47735	6.0047	5.3743	-0.247948	-0.62809	0.160014	0.00675296	0.0927439	4	5	4	1	Distal Intergenic	55170	ENSG00000198890	PRMT6	chr1	106255158	106255879
chr1|108002464|108002843	4.63217	3.56522	5.7105	5.6423	-0.284593	-0.662291	0.0173337	0.00632049	0.0909556	5	6	1	0	Intron (uc001dvc.4/22854, intron 5 of 5)	22854	ENSG00000162631	NTNG1	chr1	108002464	108002843
chr1|109531538|109531875	3.73009	2.37124	4.29013	4.04179	-0.115783	-0.769348	0.0860296	0.00402252	0.0791321	1	1	1	0	Intron (uc010ovf.2/22911, intron 7 of 12)	254268	ENSG00000162641	AKNAD1	chr1	109531538	109531875
chr1|109582178|109582515	3.47844	1.61534	2.73777	2.44331	0.509607	-0.597	0.164165	0.00678363	0.0928748	1	3	1	0	Promoter (2-3kb)	22911	ENSG00000085433	WDR47	chr1	109582178	109582515
chr1|109707924|109710325	3.39722	4.2582	4.59235	5.14148	-0.597828	-0.271941	-0.162952	0.00123822	0.0612543	12	8	3	4	Intron (uc009wex.2/57535, intron 3 of 19)	57535	ENSG00000116299	KIAA1324	chr1	109707924	109710325
chr1|10994714|10995722	2.67688	3.99694	3.84072	4.38024	-0.710457	-0.132116	-0.189633	0.00673462	0.0926634	9	7	1	1	Distal Intergenic	148345	ENSG00000175262	C1orf127	chr1	10994714	10995722
chr11|101156093|101156427	5.59038	2.48092	6.62905	4.52604	0.304697	-0.867372	0.550551	0.00387849	0.0783069	3	3	1	0	Distal Intergenic	5241	ENSG00000082175	PGR	chr11	101156093	101156427
chr11|101743261|101743643	5.52711	3.73694	8.05641	7.91441	-0.517956	-1.08262	0.025655	0.000988948	0.0606188	8	6	1	0	Distal Intergenic	57562	ENSG00000110318	CEP126	chr11	101743261	101743643
chr11|102236874|102237396	5.36202	1.84174	3.6442	3.57325	0.585539	-0.956165	0.0283673	0.00781988	0.0970936	0	4	1	0	Intron (uc001pgy.4/329, intron 5 of 8)	329	ENSG00000110330	BIRC2	chr11	102236874	102237396
chr1|110254021|110256089	3.83695	4.01797	5.64713	5.68657	-0.5676	-0.501094	-0.0100416	0.00360558	0.0766367	10	6	2	3	Promoter (<=1kb)	2949	ENSG00000134201	GSTM5	chr1	110254021	110256089
chr11|104768991|104769545	5.04047	5.75253	7.88561	10.3003	-1.03105	-0.840412	-0.385385	0.00229732	0.0682568	9	8	0	2	Promoter (<=1kb)	100506742	ENSG00000204403	CASP12	chr11	104768991	104769545
chr11|104839742|104840449	5.56771	6.22461	9.27929	8.97196	-0.688339	-0.527441	0.0485911	0.00244271	0.0692279	2	1	2	3	Promoter (<=1kb)	837	ENSG00000196954	CASP4	chr11	104839742	104840449
chr11|107137487|107137854	4.37459	2.85052	5.77608	5.96549	-0.447492	-1.06542	-0.0465479	0.000431573	0.0606188	7	4	1	0	Distal Intergenic	143884	ENSG00000152404	CWF19L2	chr11	107137487	107137854
chr1|110731079|110731389	5.16855	4.82171	6.54916	8.10514	-0.649078	-0.749293	-0.307527	0.00721791	0.094682	1	4	0	0	Intron (uc009wfq.3/388662, intron 6 of 11)	388662	ENSG00000197106	SLC6A17	chr1	110731079	110731389
chr11|107432947|107433225	4.43434	1.82208	3.10961	3.85021	0.203783	-1.07935	-0.308205	0.0065718	0.091803	0	2	0	0	Intron (uc010rvr.2/91801, intron 1 of 11)	91801	ENSG00000137760	ALKBH8	chr11	107432947	107433225
chr11|107529381|107529808	4.00554	2.1928	3.08213	3.81544	0.0701462	-0.799075	-0.307923	0.00761046	0.0962265	5	7	2	0	Intron (uc001pjm.3/55531, intron 10 of 10)	6588	ENSG00000170290	SLN	chr11	107529381	107529808
chr1|110803474|110803703	8.88547	7.08313	12.6442	10.5131	-0.242663	-0.569725	0.266288	0.00787668	0.0973071	0	2	0	0	Distal Intergenic	3749	ENSG00000116396	KCNC4	chr1	110803474	110803703
chr11|110155336|110155941	3.32686	1.98059	2.30651	2.40957	0.465384	-0.282851	-0.0630652	0.00361711	0.0767769	4	5	2	0	Intron (uc009yxx.1/5962, intron 1 of 16)	5962	ENSG00000137710	RDX	chr11	110155336	110155941
chr1|111078157|111078498	4.84991	3.7307	6.51854	6.49849	-0.422147	-0.80066	0.00444408	0.00403353	0.0792867	1	1	1	0	Distal Intergenic	3744	ENSG00000143105	KCNA10	chr1	111078157	111078498
chr11|111950627|111951135	4.25016	2.22877	4.13426	3.71637	0.193624	-0.737648	0.153735	0.00493475	0.0843022	6	4	1	0	Exon (uc001pmu.2/55216, exon 4 of 4)	55216	ENSG00000150776	NKAPD1	chr11	111950627	111951135
chr11|112428751|112430214	1.95767	2.34159	2.32435	2.34863	-0.262687	-0.00433052	-0.0149916	0.00840654	0.0993068	1	1	1	0	Distal Intergenic	349633	ENSG00000188771	PLET1	chr11	112428751	112430214
chr11|112908775|112909163	3.42687	3.68922	5.43676	5.3307	-0.63743	-0.53101	0.028423	0.00483478	0.0838768	6	5	1	1	Intron (uc001pno.3/4684, intron 1 of 8)	4684	ENSG00000149294	NCAM1	chr11	112908775	112909163
chr11|113244594|113244981	4.17833	2.57962	4.94996	4.72182	-0.176417	-0.872188	0.0680736	0.00184522	0.0647979	5	4	1	0	Distal Intergenic	255239	ENSG00000170209	ANKK1	chr11	113244594	113244981
chr11|113350619|113351206	2.71916	4.09098	4.16778	4.34868	-0.677417	-0.0881302	-0.0612984	0.00818162	0.0985848	2	2	0	1	Distal Intergenic	1813	ENSG00000149295	DRD2	chr11	113350619	113351206
chr11|113946841|113947205	5.27226	4.02036	6.62544	6.923	-0.392975	-0.784073	-0.0633805	0.00568378	0.0878968	4	3	1	0	Intron (uc001poo.1/7704, intron 2 of 3)	7704	ENSG00000109906	ZBTB16	chr11	113946841	113947205
chr11|114010106|114010503	4.64629	5.92687	7.29255	11.2052	-1.27001	-0.918822	-0.619669	0.00752826	0.0959331	5	3	0	3	Intron (uc001poo.1/7704, intron 2 of 3)	7704	ENSG00000109906	ZBTB16	chr11	114010106	114010503
chr11|114050077|114050546	3.80545	4.54675	6.50457	7.26777	-0.933444	-0.676677	-0.160059	0.0038084	0.0778392	10	7	1	4	Intron (uc001poo.1/7704, intron 3 of 3)	4837	ENSG00000166741	NNMT	chr11	114050077	114050546
chr11|11456920|11457335	4.07513	2.17832	3.12725	2.86301	0.509317	-0.394312	0.127365	0.00493699	0.0843022	3	6	1	0	Intron (uc001mjo.2/374378, intron 2 of 10)	283106	ENSG00000254598	CSNK2A3	chr11	11456920	11457335
chr1|111458032|111458340	5.6847	3.78787	6.87625	7.29307	-0.359441	-0.945139	-0.0849052	0.0017787	0.0644853	0	2	0	0	Distal Intergenic	55791	ENSG00000121931	LRIF1	chr1	111458032	111458340
chr11|114650237|114650526	5.72302	3.15954	6.99132	5.77124	-0.0121065	-0.869168	0.276682	0.00852513	0.0997758	1	3	0	0	Distal Intergenic	120406	ENSG00000204361	NXPE2	chr11	114650237	114650526
chr11|115014570|115014961	5.44696	1.8851	3.00012	2.80106	0.959477	-0.57133	0.0990472	0.00397876	0.07886	3	7	1	1	Distal Intergenic	23705	ENSG00000182985	CADM1	chr11	115014570	115014961
chr11|115108913|115109194	6.43479	4.8493	8.80425	9.21619	-0.518276	-0.926393	-0.0659693	0.002735	0.0712237	1	1	0	0	Intron (uc001ppf.4/23705, intron 3 of 8)	23705	ENSG00000182985	CADM1	chr11	115108913	115109194
chr11|115252720|115253029	5.90004	4.48258	8.28398	7.61108	-0.367378	-0.763771	0.122223	0.00705632	0.0939504	1	1	0	0	Intron (uc001ppf.4/23705, intron 1 of 8)	23705	ENSG00000182985	CADM1	chr11	115252720	115253029
chr11|115634752|115635106	4.25551	2.3124	2.51176	3.30973	0.362619	-0.517323	-0.398014	0.000785223	0.0606188	0	2	0	0	Distal Intergenic	283143	#N/A	LINC00900	chr11	115634752	115635106
chr11|116840916|116841295	4.47847	2.04489	3.18293	2.85463	0.649703	-0.481282	0.157052	0.00199305	0.0660032	4	6	1	0	Intron (uc001ppy.3/23387, intron 1 of 23)	23387	ENSG00000160584	SIK3	chr11	116840916	116841295
chr11|117028776|117029639	3.80747	2.11794	2.95178	2.50008	0.606856	-0.239313	0.239609	0.00403721	0.0793066	7	9	2	0	Intron (uc001pqe.2/5049, intron 2 of 5)	5049	ENSG00000168092	PAFAH1B2	chr11	117028776	117029639
chr11|117096553|117100511	3.0874	3.55017	4.22213	3.98173	-0.367003	-0.165507	0.084575	0.00390332	0.0784246	12	9	4	4	Promoter (2-3kb)	9159	ENSG00000160613	PCSK7	chr11	117096553	117100511
chr11|117364122|117365284	2.76609	3.74537	4.22919	4.15232	-0.586067	-0.148809	0.0264639	0.0075624	0.0959913	8	7	1	1	Intron (uc001prh.1/57453, intron 11 of 32)	22897	ENSG00000110274	CEP164	chr11	117364122	117365284
chr11|117386495|117387560	3.39411	2.40441	3.93566	2.72088	0.318958	-0.17839	0.532528	0.0084752	0.0995851	6	7	2	0	Exon (uc001prh.1/57453, exon 8 of 33)	22897	ENSG00000110274	CEP164	chr11	117386495	117387560
chr11|117470568|117471074	4.40788	5.46176	6.58777	6.7425	-0.613199	-0.303918	-0.0334927	0.00546111	0.0867777	2	4	1	0	Intron (uc001prh.1/57453, intron 3 of 32)	57453	ENSG00000177103	DSCAML1	chr11	117470568	117471074
chr11|117565624|117566472	2.72256	2.54135	3.53288	2.91969	-0.100847	-0.200218	0.275031	0.00595853	0.0892726	0	5	0	1	Intron (uc001prh.1/57453, intron 3 of 32)	57453	ENSG00000177103	DSCAML1	chr11	117565624	117566472
chr11|117607721|117608219	2.76163	2.15305	3.51241	3.32005	-0.265686	-0.624824	0.0812571	0.00613409	0.0900901	7	4	2	0	Intron (uc001prh.1/57453, intron 3 of 32)	57453	ENSG00000177103	DSCAML1	chr11	117607721	117608219
chr11|117910279|117910618	3.97774	2.70808	5.40967	4.61951	-0.21579	-0.770468	0.227801	0.00326709	0.0745581	2	3	1	0	Intron (uc001prx.1/100526771, intron 3 of 3)	56649	ENSG00000137648	TMPRSS4	chr11	117910279	117910618
chr11|117938470|117940039	3.15784	3.84392	4.37984	4.35512	-0.463774	-0.180134	0.0081632	0.00787668	0.0973071	6	7	1	1	Intron (uc001prx.1/100526771, intron 1 of 3)	56649	ENSG00000137648	TMPRSS4	chr11	117938470	117940039
chr11|118497998|118499344	3.62827	4.13282	5.58447	4.37721	-0.270728	-0.0828832	0.351409	0.00318897	0.074063	7	8	2	4	Promoter (<=1kb)	23187	ENSG00000019144	PHLDB1	chr11	118497998	118499344
chr11|118777475|118779425	4.06061	4.90251	6.3411	5.65914	-0.478886	-0.207063	0.16415	0.00854441	0.0998241	7	8	1	3	Promoter (1-2kb)	100616376	ENSG00000264211	MIR4492	chr11	118777475	118779425
chr11|118858070|118859102	3.51063	2.50409	3.10535	2.44347	0.522799	0.0353563	0.345823	0.00809332	0.0981324	4	7	2	0	Distal Intergenic	283150	ENSG00000176302	FOXR1	chr11	118858070	118859102
chr11|118986791|118987914	3.73728	4.03583	5.23986	5.19042	-0.473866	-0.362987	0.0136761	0.0046514	0.0828731	9	6	3	0	3' UTR	25988	ENSG00000172273	HINFP	chr11	118986791	118987914
chr1|111922422|111922825	4.25416	3.78113	6.1214	5.59995	-0.39654	-0.566596	0.128449	0.00819272	0.0986386	2	5	1	0	Distal Intergenic	441897	ENSG00000227179	PGCP1	chr1	111922422	111922825
chr11|119552328|119552966	2.86856	2.24295	2.01808	1.66738	0.78274	0.427814	0.275402	0.00292514	0.0725452	2	8	1	0	Intron (uc001pwu.1/5818, intron 1 of 7)	5818	ENSG00000110400	NECTIN1	chr11	119552328	119552966
chr11|11994911|11995575	5.96318	8.80388	9.69842	13.657	-1.19548	-0.633425	-0.493814	0.000614099	0.0606188	1	6	4	2	Intron (uc010rcf.2/27122, intron 2 of 5)	55031	ENSG00000170242	USP47	chr11	11994911	11995575
chr1|112002111|112002383	4.4744	4.19505	6.99168	6.08195	-0.442839	-0.535846	0.201104	0.00401885	0.0791321	1	2	0	0	Exon (uc009wgf.1/515, exon 7 of 7)	79084	ENSG00000116455	WDR77	chr1	112002111	112002383
chr11|120067079|120068528	3.37689	4.81193	4.82422	5.64595	-0.741523	-0.230601	-0.226922	0.00408532	0.0795579	10	7	2	4	Distal Intergenic	220323	ENSG00000184232	OAF	chr11	120067079	120068528
chr11|121059991|121061068	2.78687	2.9623	3.6131	3.67328	-0.398422	-0.310352	-0.0238314	0.00627764	0.0907839	4	6	3	0	Exon (uc010rzo.2/7007, exon 22 of 23)	7007	ENSG00000109927	TECTA	chr11	121059991	121061068
chr11|121461948|121462273	4.54218	3.17218	6.66132	6.2714	-0.465404	-0.983315	0.0870191	0.00164363	0.0637323	0	4	1	0	Promoter (<=1kb)	6653	ENSG00000137642	SORL1	chr11	121461948	121462273
chr11|12241815|12242147	4.80049	6.6536	9.18554	8.90107	-0.890796	-0.419843	0.0453857	0.000100665	0.0606188	2	4	1	1	Promoter (2-3kb)	9645	ENSG00000133816	MICAL2	chr11	12241815	12242147
chr11|123007953|123008732	4.08464	6.68967	7.10491	9.01094	-1.14147	-0.429742	-0.342862	0.00063665	0.0606188	6	6	1	4	Intron (uc001pyt.3/79827, intron 1 of 6)	79827	ENSG00000166250	CLMP	chr11	123007953	123008732
chr11|123106397|123107058	4.00988	3.61249	5.43842	6.32624	-0.657788	-0.808355	-0.218161	0.000398321	0.0606188	9	10	3	3	Distal Intergenic	79827	ENSG00000166250	CLMP	chr11	123106397	123107058
chr11|12339261|12339691	4.66717	2.44731	4.99952	4.3285	0.108681	-0.822668	0.207924	0.00846754	0.0995739	7	9	4	0	Intron (uc001mkg.1/84953, intron 3 of 8)	84953	ENSG00000133808	MICALCL	chr11	12339261	12339691
chr11|123429511|123429819	6.51722	9.21048	10.4629	10.0824	-0.629506	-0.130486	0.053447	0.00347476	0.075904	0	3	0	1	Promoter (1-2kb)	57476	ENSG00000023171	GRAMD1B	chr11	123429511	123429819
chr11|123461227|123461635	4.26613	5.36542	6.75153	8.67787	-1.02441	-0.69365	-0.362125	0.00505971	0.0848946	4	3	1	4	Intron (uc001pyw.2/57476, intron 4 of 20)	57476	ENSG00000023171	GRAMD1B	chr11	123461227	123461635
chr11|125014803|125016027	2.48014	2.63178	3.3765	3.39813	-0.454322	-0.368704	-0.00921206	0.00148083	0.0627392	3	5	2	0	Distal Intergenic	63876	ENSG00000165495	PKNOX2	chr11	125014803	125016027
chr11|125040088|125041193	3.50046	4.69447	4.83611	6.22887	-0.831424	-0.408009	-0.365123	0.00676521	0.0927523	7	4	4	3	Intron (uc001qbu.3/63876, intron 1 of 12)	63876	ENSG00000165495	PKNOX2	chr11	125040088	125041193
chr11|125277803|125278796	4.63822	7.07562	7.23301	7.10998	-0.616273	-0.00698815	0.0247515	0.00246292	0.0693676	6	6	4	4	Promoter (2-3kb)	63876	ENSG00000165495	PKNOX2	chr11	125277803	125278796
chr11|125763485|125764273	4.32708	2.59234	5.12377	4.33901	-0.00397301	-0.743112	0.23984	0.00699586	0.0937052	8	7	2	0	3' UTR	219844	ENSG00000198331	HYLS1	chr11	125763485	125764273
chr11|125782976|125783361	4.66911	4.30576	7.01078	6.90198	-0.563864	-0.680741	0.0225648	0.00840654	0.0993068	7	6	1	0	Intron (uc010sbk.3/29118, intron 8 of 10)	29118	ENSG00000109832	DDX25	chr11	125782976	125783361
chr11|126142479|126143272	3.61852	3.39658	4.86818	4.00895	-0.147822	-0.23914	0.280158	0.00091523	0.0606188	4	5	2	0	Promoter (1-2kb)	55572	ENSG00000110074	FOXRED1	chr11	126142479	126143272
chr11|126243922|126245316	4.11829	5.03858	6.39305	6.07754	-0.561442	-0.27047	0.0730167	0.00258181	0.0701934	5	4	4	2	Intron (uc001qds.3/6484, intron 1 of 10)	6484	ENSG00000110080	ST3GAL4	chr11	126243922	126245316
chr11|126265855|126266564	4.1195	5.41267	6.59537	7.88252	-0.936186	-0.542317	-0.257202	0.0065184	0.091617	3	5	2	1	Intron (uc001qds.3/6484, intron 1 of 10)	6484	ENSG00000110080	ST3GAL4	chr11	126265855	126266564
chr11|126280068|126281991	3.80026	3.07468	4.72903	4.44976	-0.227628	-0.53329	0.0878165	0.0034322	0.0755459	7	10	3	1	Promoter (2-3kb)	6484	ENSG00000110080	ST3GAL4	chr11	126280068	126281991
chr11|126419283|126420215	5.68438	8.93284	9.18808	10.6287	-0.902896	-0.250779	-0.210135	0.000754652	0.0606188	4	6	3	5	Exon (uc001qed.4/84623, exon 4 of 4)	6484	ENSG00000110080	ST3GAL4	chr11	126419283	126420215
chr11|12714052|12714398	4.20075	3.49409	6.52973	6.17533	-0.555871	-0.821598	0.0805066	0.000279562	0.0606188	4	4	1	0	Intron (uc021qdx.1/7003, intron 2 of 12)	7003	ENSG00000187079	TEAD1	chr11	12714052	12714398
chr11|127835035|127835430	4.83903	2.56504	2.92719	3.45759	0.484949	-0.430787	-0.240253	0.00423695	0.0805104	7	6	1	2	Distal Intergenic	2113	ENSG00000134954	ETS1	chr11	127835035	127835430
chr11|128780594|128781828	4.24501	4.88781	6.26917	5.18185	-0.287699	-0.0842786	0.274807	0.0050048	0.0846338	1	4	4	2	Promoter (<=1kb)	3762	ENSG00000120457	KCNJ5	chr11	128780594	128781828
chr11|128813012|128814293	4.42612	5.50808	7.03972	7.65395	-0.790163	-0.474654	-0.120687	8.98298e-05	0.0606188	8	9	3	4	Promoter (<=1kb)	63970	ENSG00000120471	TP53AIP1	chr11	128813012	128814293
chr11|128896619|128897564	2.08487	2.63771	2.92028	2.72719	-0.38746	-0.0481297	0.0986907	0.00540435	0.0865745	0	1	2	0	Promoter (2-3kb)	9743	ENSG00000134909	ARHGAP32	chr11	128896619	128897564
chr1|112901654|112902013	4.88938	3.06891	4.31765	3.2116	0.60636	-0.0655638	0.426955	0.00069316	0.0606188	5	4	1	0	Distal Intergenic	55917	ENSG00000143079	CTTNBP2NL	chr1	112901654	112902013
chr11|129176457|129176753	4.82672	3.61761	7.02085	5.32915	-0.142864	-0.55887	0.39774	0.00634634	0.091019	1	1	0	0	Distal Intergenic	8538	ENSG00000043039	BARX2	chr11	129176457	129176753
chr11|129310649|129311059	2.67491	2.61604	4.0133	3.83566	-0.519981	-0.552087	0.0653164	0.00181332	0.0646663	4	4	1	1	Intron (uc001qfc.4/8538, intron 2 of 3)	8538	ENSG00000043039	BARX2	chr11	129310649	129311059
chr11|129503070|129503999	2.55452	2.93626	3.55125	3.41111	-0.417191	-0.216261	0.0580868	0.00765536	0.0963923	4	5	2	0	Distal Intergenic	120224	ENSG00000151715	TMEM45B	chr11	129503070	129503999
chr11|129527866|129528720	3.52899	3.85792	4.71177	5.72193	-0.697247	-0.568679	-0.280233	0.00218943	0.0673281	4	3	0	3	Distal Intergenic	120224	ENSG00000151715	TMEM45B	chr11	129527866	129528720
chr11|130102630|130104155	2.98749	2.69908	4.12741	4.03901	-0.435069	-0.581535	0.0312368	0.00531668	0.0861519	9	6	2	0	3' UTR	29068	ENSG00000196323	ZBTB44	chr11	130102630	130104155
chr11|130188927|130189469	4.38331	5.62725	6.66804	7.36385	-0.748438	-0.388029	-0.143197	0.00727039	0.0948603	1	3	4	1	Intron (uc001qgd.2/uc001qgd.2, intron 1 of 5)	29068	ENSG00000196323	ZBTB44	chr11	130188927	130189469
chr11|130310655|130310997	3.26807	2.27341	4.27445	4.43412	-0.440209	-0.963793	-0.0529102	0.00601285	0.0895769	1	1	1	0	Distal Intergenic	170689	ENSG00000166106	ADAMTS15	chr11	130310655	130310997
chr11|130312940|130313385	3.66718	3.62477	5.14925	6.02903	-0.717254	-0.734035	-0.227564	0.00559925	0.0875654	11	6	0	4	Distal Intergenic	170689	ENSG00000166106	ADAMTS15	chr11	130312940	130313385
chr11|130321752|130322600	2.92178	4.34458	4.75924	5.60005	-0.938591	-0.366222	-0.234707	0.000213906	0.0606188	5	2	1	1	Promoter (2-3kb)	170689	ENSG00000166106	ADAMTS15	chr11	130321752	130322600
chr11|130327736|130328601	3.36609	3.6583	4.38822	5.23636	-0.637491	-0.517389	-0.254929	0.00481503	0.0837833	8	5	1	3	Intron (uc010scd.2/170689, intron 1 of 7)	170689	ENSG00000166106	ADAMTS15	chr11	130327736	130328601
chr11|130767081|130767732	3.45138	5.59073	6.78741	7.44538	-1.10917	-0.41331	-0.133485	0.00056609	0.0606188	6	7	2	3	Intron (uc010sce.2/399979, intron 8 of 10)	399979	ENSG00000120451	SNX19	chr11	130767081	130767732
chr11|131148505|131148962	2.77126	2.3585	1.52884	1.33827	1.05017	0.817501	0.192072	0.00650069	0.0915769	1	5	1	1	Distal Intergenic	50863	ENSG00000182667	NTM	chr11	131148505	131148962
chr11|131288034|131288469	2.87308	2.25378	1.47707	1.82173	0.657287	0.307032	-0.302575	0.00269773	0.0709371	3	3	2	3	Intron (uc001qgm.3/50863, intron 1 of 7)	50863	ENSG00000182667	NTM	chr11	131288034	131288469
chr11|131608031|131608404	4.81122	4.1346	2.89576	3.31365	0.53798	0.319326	-0.19448	0.00414154	0.0798678	2	4	1	2	Intron (uc001qgm.3/50863, intron 1 of 7)	50863	ENSG00000182667	NTM	chr11	131608031	131608404
chr11|131787683|131788075	3.67483	2.76236	2.56886	1.91408	0.941029	0.529253	0.424481	0.00576695	0.088318	4	4	1	0	Intron (uc001qgm.3/50863, intron 2 of 7)	50863	ENSG00000182667	NTM	chr11	131787683	131788075
chr1|113194665|113195026	4.46791	2.40354	3.88396	3.38416	0.400806	-0.493633	0.198733	0.00816683	0.0984975	3	3	1	0	Intron (uc001ecj.1/829, intron 3 of 9)	4343	ENSG00000155363	MOV10	chr1	113194665	113195026
chr1|113268901|113269394	3.75559	2.7745	4.1994	3.43372	0.129265	-0.307547	0.290408	0.00832337	0.0991269	8	7	4	0	3' UTR	284467	ENSG00000184599	FAM19A3	chr1	113268901	113269394
chr11|132779651|132780179	2.57767	2.07871	1.44011	1.70746	0.594213	0.283835	-0.245679	0.000740155	0.0606188	1	7	1	2	Intron (uc001qgs.3/4978, intron 1 of 6)	4978	ENSG00000183715	OPCML	chr11	132779651	132780179
chr11|133256934|133257446	4.66826	7.4712	8.03807	8.18521	-0.810135	-0.131678	-0.0261702	0.0070149	0.0937297	6	8	3	2	Intron (uc001qgu.3/4978, intron 1 of 7)	4978	ENSG00000183715	OPCML	chr11	133256934	133257446
chr11|133510798|133511180	5.60047	10.9554	9.38486	12.0067	-1.10022	-0.132196	-0.355434	0.00107647	0.060705	4	7	0	2	Distal Intergenic	4978	ENSG00000183715	OPCML	chr11	133510798	133511180
chr11|133853975|133854691	2.90538	2.7314	2.10233	2.30124	0.336311	0.247227	-0.130427	0.00469605	0.0830574	2	8	1	0	Distal Intergenic	22997	ENSG00000080854	IGSF9B	chr11	133853975	133854691
chr11|134073516|134073792	4.01386	2.76612	5.86944	5.07313	-0.337884	-0.87501	0.210347	0.00747056	0.0956904	1	2	0	0	Exon (uc001qhd.1/23310, exon 11 of 35)	23310	ENSG00000151503	NCAPD3	chr11	134073516	134073792
chr11|1340889|1341936	2.66017	3.04052	3.71532	3.37928	-0.345198	-0.152397	0.136773	0.00281108	0.0716958	4	5	1	0	Distal Intergenic	255512	ENSG00000255153	TOLLIP-AS1	chr11	1340889	1341936
chr11|134156593|134158126	2.27125	3.35211	3.11631	2.86567	-0.335388	0.226197	0.120966	0.00266705	0.0707141	2	2	1	2	Intron (uc010scs.2/112937, intron 6 of 9)	112937	ENSG00000166105	GLB1L3	chr11	134156593	134158126
chr11|134159882|134160185	3.55164	3.86966	6.25693	6.33116	-0.833984	-0.710262	-0.0170133	0.000282433	0.0606188	1	3	0	0	Promoter (1-2kb)	112937	ENSG00000166105	GLB1L3	chr11	134159882	134160185
chr11|134367986|134369080	3.94903	5.45503	5.37441	4.24	-0.102564	0.363524	0.342044	0.00853669	0.0998241	4	8	1	2	Intron (uc001qhs.3/283177, intron 5 of 5)	283177	#N/A	LOC283177	chr11	134367986	134369080
chr11|134877435|134877783	5.29039	9.52909	8.62222	12.7876	-1.2733	-0.424336	-0.568614	0.00386437	0.0782539	2	1	1	1	Distal Intergenic	283177	#N/A	LOC283177	chr11	134877435	134877783
chr1|113560970|113561341	3.74567	1.82767	3.01832	2.5976	0.528041	-0.507179	0.216566	0.00592079	0.0890834	0	1	1	0	Intron (uc001ede.1/uc001ede.1, intron 2 of 2)	9860	ENSG00000198799	LRIG2	chr1	113560970	113561341
chr1|113766218|113766628	3.55648	3.97605	5.63086	6.96891	-0.970484	-0.809598	-0.307578	0.00155619	0.0632139	5	5	0	2	Distal Intergenic	643441	#N/A	LOC643441	chr1	113766218	113766628
chr1|114153109|114153449	5.76486	6.39572	8.7883	8.51227	-0.562258	-0.412437	0.0460409	0.00730669	0.0950367	2	2	1	0	Intron (uc001edh.3/260425, intron 6 of 21)	260425	ENSG00000081026	MAGI3	chr1	114153109	114153449
chr1|114517525|114517854	5.44906	3.20437	5.90753	6.46202	-0.245979	-1.01194	-0.12943	0.00587262	0.0888289	0	4	1	0	3' UTR	56944	ENSG00000116774	OLFML3	chr1	114517525	114517854
chr1|114995005|114995324	4.72535	2.87274	5.89387	4.28308	0.141771	-0.576222	0.460566	0.00469605	0.0830574	0	4	1	0	Intron (uc010ows.2/51592, intron 2 of 18)	51592	ENSG00000197323	TRIM33	chr1	114995005	114995324
chr1|115110762|115111082	4.7321	2.46188	5.60424	5.24679	-0.148955	-1.09167	0.0950816	0.0017272	0.0642435	0	4	1	0	Exon (uc001eez.3/163259, exon 24 of 30)	10286	ENSG00000116752	BCAS2	chr1	115110762	115111082
chr1|115223202|115223514	5.4151	4.25571	6.96555	7.52192	-0.474113	-0.821703	-0.110865	0.00581427	0.0886355	1	3	0	1	Intron (uc001efe.2/270, intron 5 of 15)	163259	ENSG00000175984	DENND2C	chr1	115223202	115223514
chr11|15904380|15904774	6.07751	7.76896	10.012	12.5238	-1.04312	-0.688878	-0.322946	0.00391401	0.0784425	7	5	0	2	Distal Intergenic	55553	ENSG00000110693	SOX6	chr11	15904380	15904774
chr1|116485115|116485444	4.80874	3.01714	5.72571	4.57875	0.0707044	-0.60177	0.322502	0.00701807	0.0937376	0	2	1	0	Distal Intergenic	55356	ENSG00000163393	SLC22A15	chr1	116485115	116485444
chr11|16508277|16508596	3.98641	2.4661	4.82323	3.97761	0.00319014	-0.689669	0.278099	0.00429719	0.0808047	1	2	1	0	Intron (uc001mmh.1/55553, intron 4 of 9)	55553	ENSG00000110693	SOX6	chr11	16508277	16508596
chr11|16657876|16658161	5.14297	6.59119	8.22129	7.26737	-0.498833	-0.140894	0.17793	0.00307594	0.0733726	0	2	0	1	Intron (uc001mmh.1/55553, intron 3 of 9)	55553	ENSG00000110693	SOX6	chr11	16657876	16658161
chr1|116708336|116708786	3.55027	2.03511	2.25374	2.89978	0.291987	-0.510834	-0.363622	0.00231634	0.068399	2	10	3	0	Distal Intergenic	126868	ENSG00000173212	MAB21L3	chr1	116708336	116708786
chr11|16934297|16934665	5.40992	4.79702	7.55074	7.62466	-0.495065	-0.668534	-0.0140555	0.00332731	0.0747782	6	4	1	0	Intron (uc010rcu.1/144100, intron 3 of 26)	144100	ENSG00000166689	PLEKHA7	chr11	16934297	16934665
chr1|117238544|117239127	4.88484	2.02025	2.80253	2.69052	0.860425	-0.41335	0.058844	0.00351302	0.0760841	5	7	2	0	Distal Intergenic	100302117	ENSG00000211543	MIR320B1	chr1	117238544	117239127
chr11|17306831|17307217	4.63155	2.26459	4.01237	3.32781	0.476922	-0.555324	0.269879	0.008556	0.099869	2	6	1	0	Intron (uc001mms.1/4925, intron 6 of 12)	4925	ENSG00000070081	NUCB2	chr11	17306831	17307217
chr1|117367097|117368227	3.02809	2.78178	3.64968	3.90198	-0.365797	-0.4882	-0.0964379	0.00702762	0.0938152	9	6	1	1	Distal Intergenic	914	ENSG00000116824	CD2	chr1	117367097	117368227
chr1|117406806|117407168	3.16139	3.75788	5.76215	5.98753	-0.921402	-0.67204	-0.0553539	0.000347393	0.0606188	3	2	1	1	Distal Intergenic	5738	ENSG00000134247	PTGFRN	chr1	117406806	117407168
chr1|117414082|117414423	4.50349	5.26512	7.3428	7.98009	-0.825362	-0.599939	-0.120074	0.000394279	0.0606188	3	2	1	0	Distal Intergenic	5738	ENSG00000134247	PTGFRN	chr1	117414082	117414423
chr11|17511475|17511813	5.87435	4.45683	7.18613	8.95805	-0.608755	-1.00717	-0.31797	0.00314988	0.0738057	2	5	1	0	Distal Intergenic	6833	ENSG00000006071	ABCC8	chr11	17511475	17511813
chr11|17705836|17706155	5.28177	8.3179	8.43289	8.44688	-0.677396	-0.0221977	-0.00239054	0.00176406	0.0643418	1	2	1	1	Distal Intergenic	4654	ENSG00000129152	MYOD1	chr11	17705836	17706155
chr1|11790834|11792963	2.87035	3.66697	4.00544	4.55399	-0.665904	-0.312542	-0.185171	0.00081929	0.0606188	9	8	2	3	Distal Intergenic	57085	ENSG00000177674	AGTRAP	chr1	11790834	11792963
chr1|118238926|118239411	2.23075	2.91423	4.02458	4.99499	-1.16295	-0.777368	-0.311643	0.00308156	0.0733836	9	4	0	3	Distal Intergenic	54855	ENSG00000183508	FAM46C	chr1	118238926	118239411
chr1|118293456|118293815	3.23249	1.98161	3.85459	3.47398	-0.103944	-0.809918	0.149986	0.0068021	0.0929266	4	1	1	0	Distal Intergenic	54855	ENSG00000183508	FAM46C	chr1	118293456	118293815
chr1|118802163|118803078	2.46283	3.27924	3.5505	3.59521	-0.545755	-0.132714	-0.0180537	0.000398136	0.0606188	2	4	0	2	Distal Intergenic	200162	ENSG00000155761	SPAG17	chr1	118802163	118803078
chr11|19652824|19653237	4.72656	3.0902	5.19224	3.90546	0.275297	-0.337794	0.410866	0.0070149	0.0937297	6	5	1	0	Intron (uc001mpp.3/89797, intron 1 of 37)	100616118	ENSG00000265210	MIR4486	chr11	19652824	19653237
chr11|20427685|20427962	5.55404	3.27619	6.80174	6.59638	-0.248138	-1.00966	0.0442279	0.00456958	0.0823037	0	2	0	0	Intron (uc001mqb.3/10196, intron 8 of 15)	10196	ENSG00000185238	PRMT3	chr11	20427685	20427962
chr11|205245|206008	4.11125	5.29168	7.12012	6.59546	-0.681897	-0.317747	0.110427	0.00015719	0.0606188	5	4	1	2	Promoter (1-2kb)	51272	ENSG00000177951	BET1L	chr11	205245	206008
chr1|120785637|120785976	5.45942	2.83045	5.57623	4.49536	0.280311	-0.667403	0.310852	0.0075624	0.0959913	2	5	1	0	Distal Intergenic	653820	ENSG00000188610	FAM72B	chr1	120785637	120785976
chr11|2457356|2457991	5.30949	8.16997	7.56347	7.76511	-0.548433	0.0733246	-0.0379587	0.00300097	0.0729686	4	6	1	3	Distal Intergenic	3784	ENSG00000053918	KCNQ1	chr11	2457356	2457991
chr1|12538329|12539124	2.57214	2.83226	3.42088	3.44006	-0.419468	-0.280481	-0.0080662	0.00324627	0.074426	4	6	2	0	Intron (uc001atv.3/55187, intron 67 of 69)	677882	ENSG00000266079	SNORA59B	chr1	12538329	12539124
chr1|1258124|1258701	3.96638	3.33466	5.74509	4.12818	-0.0576838	-0.30797	0.476822	0.00744693	0.0956464	4	5	1	0	Promoter (1-2kb)	54973	ENSG00000127054	INTS11	chr1	1258124	1258701
chr11|25815043|25815375	4.37077	5.01967	6.5551	5.83732	-0.41742	-0.217714	0.167311	0.00771447	0.0965811	2	2	1	1	Distal Intergenic	63982	ENSG00000134343	ANO3	chr11	25815043	25815375
chr11|2654162|2654510	7.38739	5.10445	10.4193	10.4297	-0.497563	-1.03087	-0.00143649	0.00694219	0.0935307	5	6	1	0	Exon (uc001lwp.3/10984, exon 1 of 1)	10984	ENSG00000269821	KCNQ1OT1	chr11	2654162	2654510
chr11|2673504|2674192	5.04212	5.00346	7.12402	8.03467	-0.672208	-0.683313	-0.173548	0.00139941	0.0622804	8	9	1	1	Exon (uc001lwp.3/10984, exon 1 of 1)	10984	ENSG00000269821	KCNQ1OT1	chr11	2673504	2674192
chr11|28525364|28525670	5.40198	3.62654	7.11008	5.82137	-0.107871	-0.682764	0.288505	0.00652431	0.0916589	0	2	0	0	Distal Intergenic	196074	ENSG00000169519	METTL15	chr11	28525364	28525670
chr11|31844251|31845110	5.28318	9.43387	7.88788	8.95408	-0.76114	0.0753044	-0.182908	0.00486124	0.0839901	7	7	1	5	Intron (uc021qfo.1/440034, intron 1 of 2)	5080	ENSG00000007372	PAX6	chr11	31844251	31845110
chr11|32773096|32773470	5.57692	2.35704	5.16831	4.83325	0.206476	-1.03601	0.0966994	0.00625207	0.0907198	5	7	1	0	Intron (uc001mtv.4/493860, intron 2 of 17)	493860	ENSG00000186714	CCDC73	chr11	32773096	32773470
chr11|32968317|32968701	5.00015	2.48715	3.44497	2.99101	0.741341	-0.266137	0.203862	0.00125082	0.0613509	1	4	1	0	Intron (uc001mty.3/79832, intron 4 of 12)	79832	ENSG00000060749	QSER1	chr11	32968317	32968701
chr11|33176133|33176625	4.29387	2.49449	4.63689	3.3713	0.348973	-0.434561	0.459854	0.00732656	0.0950455	0	2	1	0	Intron (uc001muh.3/1479, intron 1 of 20)	1479	ENSG00000176102	CSTF3	chr11	33176133	33176625
chr11|33569028|33569750	2.33793	2.11729	1.76107	1.54847	0.594389	0.451375	0.185609	0.00568894	0.0878977	4	9	2	1	Exon (uc001mun.1/25758, exon 3 of 11)	25758	ENSG00000110427	KIAA1549L	chr11	33569028	33569750
chr11|34202497|34203242	3.21791	2.86745	2.14758	2.4301	0.405107	0.238749	-0.178307	0.00703717	0.093878	0	6	2	1	Intron (uc001mvl.2/25841, intron 3 of 16)	55226	ENSG00000135372	NAT10	chr11	34202497	34203242
chr11|34204853|34206293	4.2747	2.83242	3.44617	3.0511	0.486493	-0.107295	0.175664	0.00402252	0.0791321	2	9	2	0	Intron (uc001mvl.2/25841, intron 3 of 16)	55226	ENSG00000135372	NAT10	chr11	34204853	34206293
chr11|34489898|34490318	3.85839	1.98273	2.11181	2.61549	0.560922	-0.399592	-0.308602	0.00312409	0.0736396	6	7	3	0	Exon (uc001mvm.3/847, exon 11 of 13)	847	ENSG00000121691	CAT	chr11	34489898	34490318
chr11|35811260|35811565	5.1217	2.54034	3.7256	2.81912	0.861381	-0.150223	0.402232	0.00169032	0.0639341	0	3	0	0	Intron (uc001mwi.2/54765, intron 4 of 4)	54765	ENSG00000166326	TRIM44	chr11	35811260	35811565
chr11|3668474|3669249	3.34578	3.26487	4.20166	3.61393	-0.111227	-0.146542	0.217393	0.00663465	0.0922263	4	4	2	0	Promoter (2-3kb)	417	ENSG00000129744	ART1	chr11	3668474	3669249
chr11|3850639|3851273	3.42141	2.224	2.99861	2.98486	0.196927	-0.424508	0.00662958	0.00648303	0.0915769	4	4	2	0	Intron (uc001lyu.2/391, intron 1 of 1)	391	ENSG00000177105	RHOG	chr11	3850639	3851273
chr11|38912283|38912696	5.74697	2.61858	5.8664	4.94941	0.215547	-0.918471	0.24522	0.00565803	0.087777	6	9	1	0	Distal Intergenic	57689	ENSG00000148948	LRRC4C	chr11	38912283	38912696
chr11|39369435|39369800	6.6707	4.1586	7.30805	6.33714	0.0740065	-0.607735	0.205656	0.00543142	0.0867149	1	5	1	0	Distal Intergenic	57689	ENSG00000148948	LRRC4C	chr11	39369435	39369800
chr11|39410308|39410586	4.98818	3.42724	6.7755	5.60825	-0.169036	-0.710502	0.272777	0.00783404	0.0971256	1	1	0	0	Distal Intergenic	57689	ENSG00000148948	LRRC4C	chr11	39410308	39410586
chr11|4004949|4005258	4.18559	2.30222	3.04316	3.61864	0.209981	-0.652424	-0.24988	0.00584072	0.0887407	0	2	0	0	Intron (uc001lyv.2/6786, intron 2 of 11)	6786	ENSG00000167323	STIM1	chr11	4004949	4005258
chr11|40051777|40052105	5.01644	2.20481	4.25117	3.298	0.60507	-0.580938	0.366268	0.00395166	0.0787331	1	4	1	0	Distal Intergenic	57689	ENSG00000148948	LRRC4C	chr11	40051777	40052105
chr11|41481653|41481939	6.38268	8.64824	10.1199	12.3932	-0.957318	-0.519074	-0.292356	0.00604842	0.0896824	0	2	0	1	Promoter (<=1kb)	57689	ENSG00000148948	LRRC4C	chr11	41481653	41481939
chr11|41522909|41523323	5.34183	1.8946	3.42925	3.30965	0.690655	-0.804787	0.0512141	0.00804953	0.0979831	3	6	2	0	Distal Intergenic	57689	ENSG00000148948	LRRC4C	chr11	41522909	41523323
chr11|41677655|41678354	3.39383	3.95366	4.40203	4.94675	-0.543568	-0.323293	-0.168313	0.00523517	0.0856361	6	7	0	3	Distal Intergenic	57689	ENSG00000148948	LRRC4C	chr11	41677655	41678354
chr11|42065583|42065993	5.52311	2.36794	3.86774	3.59184	0.620757	-0.601093	0.106769	0.00599922	0.089505	3	6	1	0	Distal Intergenic	100507205	#N/A	LOC100507205	chr11	42065583	42065993
chr11|42917929|42918219	4.89222	7.35029	7.11477	10.3486	-1.08087	-0.49356	-0.540545	0.00705313	0.0939504	0	1	0	1	Distal Intergenic	399881	ENSG00000251557	HNRNPKP3	chr11	42917929	42918219
chr11|43177727|43179163	1.98265	2.64273	2.84751	2.60679	-0.394842	0.0197582	0.127426	0.00571224	0.0880162	11	9	1	3	Distal Intergenic	399881	ENSG00000251557	HNRNPKP3	chr11	43177727	43179163
chr11|44193235|44193582	6.31461	4.89467	9.07129	8.4379	-0.41819	-0.785673	0.104424	0.000652742	0.0606188	3	2	1	0	Exon (uc010rfo.2/2132, exon 8 of 14)	2132	ENSG00000151348	EXT2	chr11	44193235	44193582
chr11|44926926|44927203	4.688	3.88578	2.75993	2.6144	0.842492	0.571722	0.0781507	0.00469392	0.0830574	1	3	0	1	Promoter (<=1kb)	90139	ENSG00000157570	TSPAN18	chr11	44926926	44927203
chr11|4514107|4514949	3.20019	4.83739	4.31629	4.60321	-0.524485	0.0715888	-0.0928499	0.00675908	0.0927523	7	12	0	5	Distal Intergenic	390036	ENSG00000196778	OR52K1	chr11	4514107	4514949
chr11|45273920|45274541	4.72367	4.37935	6.83748	6.71986	-0.508524	-0.617713	0.0250327	0.00235485	0.068698	3	5	1	0	Exon (uc001myq.2/57586, exon 4 of 6)	57586	ENSG00000019505	SYT13	chr11	45273920	45274541
chr1|145462293|145464736	2.74637	2.21362	2.12689	2.12187	0.372191	0.061071	0.00340721	0.00716906	0.0944304	3	7	2	0	Intron (uc021ott.2/100288142, intron 99 of 131)	84265	ENSG00000121851	POLR3GL	chr1	145462293	145464736
chr1|14585667|14586152	3.255	4.96949	5.81891	6.5892	-1.01745	-0.407006	-0.179355	0.00362537	0.0768474	4	5	1	4	Distal Intergenic	23254	ENSG00000189337	KAZN	chr1	14585667	14586152
chr11|45984367|45984896	3.9863	2.64269	4.19085	3.52706	0.176584	-0.416461	0.248778	0.00671634	0.0925404	4	2	0	0	Intron (uc001ncb.4/51317, intron 9 of 17)	51317	ENSG00000135365	PHF21A	chr11	45984367	45984896
chr11|46349628|46350341	4.38346	2.61399	3.25363	3.38476	0.373015	-0.372803	-0.057003	0.00801321	0.0978443	4	8	2	0	Distal Intergenic	8525	ENSG00000149091	DGKZ	chr11	46349628	46350341
chr11|46481505|46481966	3.78697	1.94266	2.65197	3.20273	0.241739	-0.721269	-0.272239	0.00344319	0.0755942	5	9	2	0	Intron (uc010rgt.2/55626, intron 5 of 9)	100422827	ENSG00000265014	MIR3160-1	chr11	46481505	46481966
chr11|46655891|46656444	3.99843	1.92704	2.89608	2.41036	0.730185	-0.322868	0.26485	0.00642451	0.0912948	1	4	1	0	Intron (uc001ncz.3/9776, intron 2 of 16)	9776	ENSG00000175224	ATG13	chr11	46655891	46656444
chr1|146671641|146671938	4.67102	1.78497	2.52595	2.39539	0.96348	-0.424359	0.0765641	0.00724083	0.0948216	0	2	0	0	Intron (uc001eph.4/2330, intron 7 of 8)	171423	#N/A	PDIA3P1	chr1	146671641	146671938
chr11|46731574|46733958	2.79573	3.10384	3.47046	3.53609	-0.338926	-0.188101	-0.0270261	0.00202251	0.0662139	6	10	4	1	Distal Intergenic	2147	ENSG00000180210	F2	chr11	46731574	46733958
chr11|46810851|46811525	5.02738	4.49423	6.92919	6.44401	-0.358152	-0.519886	0.104726	0.00315276	0.0738414	11	8	3	0	Intron (uc009ylg.1/9793, intron 13 of 41)	9793	ENSG00000175216	CKAP5	chr11	46810851	46811525
chr11|46896274|46898418	2.9025	2.88896	3.86542	2.82526	0.0389126	0.0321659	0.452242	0.00384154	0.0780478	8	6	1	0	Exon (uc001ndn.4/4038, exon 24 of 38)	4038	ENSG00000134569	LRP4	chr11	46896274	46898418
chr11|47217156|47217786	3.58597	1.83422	1.96197	2.20483	0.701692	-0.265506	-0.16837	0.00638097	0.0911237	2	5	0	0	Distal Intergenic	29763	ENSG00000165912	PACSIN3	chr11	47217156	47217786
chr11|47505606|47507638	4.58287	2.71543	4.03021	3.31042	0.469237	-0.285831	0.283841	0.00174633	0.0642481	10	12	4	0	Promoter (2-3kb)	10658	ENSG00000149187	CELF1	chr11	47505606	47507638
chr11|47543553|47543998	2.93361	3.00202	2.06558	2.51713	0.220897	0.254154	-0.285229	0.00405935	0.0794457	2	10	2	0	Promoter (1-2kb)	10658	ENSG00000149187	CELF1	chr11	47543553	47543998
chr11|47626199|47626777	2.45362	1.85527	1.55922	1.81433	0.435472	0.0321903	-0.218612	0.00747733	0.095732	3	8	2	0	Distal Intergenic	114900	ENSG00000172247	C1QTNF4	chr11	47626199	47626777
chr1|148913004|148913493	8.2145	4.9811	3.56827	3.86092	1.08923	0.367519	-0.113721	0.00270143	0.0709375	3	8	2	3	Distal Intergenic	645166	ENSG00000283196	LOC645166	chr1	148913004	148913493
chr11|49013067|49013361	7.03124	8.30529	10.8717	10.5364	-0.583527	-0.343275	0.0451994	0.00368539	0.0771143	0	1	0	1	Distal Intergenic	283116	ENSG00000182053	TRIM49B	chr11	49013067	49013361
chr1|149297807|149298902	9.08352	14.576	14.0848	19.1562	-1.07649	-0.394214	-0.443668	0.00122068	0.0612161	7	7	1	5	Exon (uc021oxl.1/uc021oxl.1, exon 1 of 1)	388692	#N/A	LOC388692	chr1	149297807	149298902
chr1|149683365|149684436	2.59354	5.11046	5.66881	6.99255	-1.43089	-0.452364	-0.302772	1.92171e-05	0.0606188	1	2	0	2	Exon (uc021oxv.1/uc021oxv.1, exon 1 of 1)	2209	ENSG00000150337	FCGR1A	chr1	149683365	149684436
chr11|50220008|50220378	3.7913	2.04549	2.93473	3.05069	0.313557	-0.576687	-0.0559087	0.00722772	0.0947373	3	5	1	0	Distal Intergenic	441601	ENSG00000255042	LOC441601	chr11	50220008	50220378
chr1|150282813|150283951	3.28837	2.27919	2.27535	2.23209	0.558975	0.0301259	0.0276904	0.00612297	0.0900523	4	9	1	1	Distal Intergenic	9129	ENSG00000117360	PRPF3	chr1	150282813	150283951
chr1|150314271|150315508	4.12536	2.35735	3.00081	2.7023	0.610335	-0.197017	0.151165	0.0075761	0.0960261	6	8	2	0	Exon (uc009wlq.1/9129, exon 5 of 9)	9129	ENSG00000117360	PRPF3	chr1	150314271	150315508
chr1|150331438|150332012	3.33569	2.26155	2.19943	2.05793	0.696788	0.136118	0.0959347	0.00219747	0.0673577	5	5	1	0	Distal Intergenic	23248	ENSG00000163125	RPRD2	chr1	150331438	150332012
chr1|150840650|150841299	2.8147	1.85346	1.59153	1.84035	0.613005	0.01024	-0.20956	0.000518443	0.0606188	4	8	2	0	Intron (uc001evr.2/405, intron 1 of 21)	405	ENSG00000143437	ARNT	chr1	150840650	150841299
chr1|150951560|150951780	4.64636	3.93016	2.33291	2.83244	0.71406	0.472546	-0.279912	0.00476709	0.0834914	0	2	0	0	Promoter (2-3kb)	8416	ENSG00000143412	ANXA9	chr1	150951560	150951780
chr14|88237384|88237701	94.7745	4.66635	85.8193	3.14082	4.91529	0.571157	4.77209	0.00730008	0.0949922	0	3	1	0	Distal Intergenic	2581	ENSG00000054983	GALC	chr14	88237384	88237701
chr1|151455013|151455481	4.67685	2.63967	4.2132	3.46373	0.433208	-0.391973	0.282589	0.00621531	0.0905648	0	3	2	0	Distal Intergenic	23126	ENSG00000143442	POGZ	chr1	151455013	151455481
chr1|151511012|151511697	2.53538	2.0833	1.825	1.61355	0.651967	0.368636	0.177661	0.00423309	0.0804746	8	8	0	0	Promoter (1-2kb)	7286	ENSG00000143367	TUFT1	chr1	151511012	151511697
chr1|152000697|152001844	2.64673	1.83265	1.54987	1.88945	0.486243	-0.0440375	-0.285822	0.00834974	0.0992421	3	8	2	0	Intron (uc001ezm.1/uc001ezm.1, intron 12 of 12)	6282	ENSG00000163191	S100A11	chr1	152000697	152001844
chr11|5218924|5219287	5.52387	2.54583	5.26116	4.37023	0.33797	-0.779572	0.267672	0.0078838	0.0973658	2	4	1	0	Promoter (2-3kb)	283111	ENSG00000176742	OR51V1	chr11	5218924	5219287
chr1|15322459|15323215	2.53291	3.49619	3.95521	3.96475	-0.646431	-0.181445	-0.0034754	0.00163309	0.0636078	0	4	1	1	Intron (uc009vog.1/23254, intron 2 of 7)	23254	ENSG00000189337	KAZN	chr1	15322459	15323215
chr1|153485855|153488510	2.28341	2.20259	1.6794	1.83577	0.314804	0.26281	-0.128442	0.00858698	0.0999915	3	9	3	1	Distal Intergenic	6277	ENSG00000197956	S100A6	chr1	153485855	153488510
chr1|153705439|153706175	3.77277	2.3601	2.4831	2.43238	0.633258	-0.043518	0.0297773	0.00133466	0.0619395	4	6	2	0	Intron (uc009wom.3/65123, intron 2 of 30)	65123	ENSG00000143624	INTS3	chr1	153705439	153706175
chr1|153811067|153811443	6.48262	3.31632	5.52731	4.7482	0.449195	-0.517797	0.219195	0.00607868	0.0898336	6	5	1	0	Intron (uc001fdb.4/57459, intron 1 of 10)	11000	ENSG00000143554	SLC27A3	chr1	153811067	153811443
chr1|153897216|153897659	3.38269	2.15776	1.90069	1.94548	0.798049	0.149412	-0.0336029	6.6369e-05	0.0606188	1	6	0	0	Promoter (1-2kb)	57459	ENSG00000143614	GATAD2B	chr1	153897216	153897659
chr1|153901836|153903584	4.78755	2.97764	4.11287	2.99437	0.677034	-0.00808629	0.457892	0.00602377	0.0895769	8	9	2	0	3' UTR	57459	ENSG00000143614	GATAD2B	chr1	153901836	153903584
chr1|154404924|154405545	2.91911	1.87605	1.68381	1.7171	0.765554	0.127723	-0.0282445	0.00580636	0.088584	1	5	0	0	Intron (uc021paf.1/3570, intron 3 of 6)	3570	ENSG00000160712	IL6R	chr1	154404924	154405545
chr1|154409703|154410352	4.07759	1.99652	2.17395	1.9411	1.07085	0.0406136	0.16345	0.00298183	0.0728072	7	8	2	0	3' UTR	3570	ENSG00000160712	IL6R	chr1	154409703	154410352
chr1|154416976|154417546	3.79488	3.02981	2.44568	2.15047	0.8194	0.494574	0.18558	0.000957983	0.0606188	2	7	2	0	Intron (uc001fez.2/3570, intron 6 of 9)	3570	ENSG00000160712	IL6R	chr1	154416976	154417546
chr1|1546246|1547252	3.28634	3.98561	4.95638	5.59644	-0.768027	-0.489709	-0.175222	0.000232578	0.0606188	6	7	3	2	Distal Intergenic	142678	ENSG00000197530	MIB2	chr1	1546246	1547252
chr1|154808680|154811115	3.50843	2.89453	2.73129	2.74168	0.355765	0.0782676	-0.00547957	0.00285904	0.0720039	5	9	1	1	Intron (uc001ffo.3/3782, intron 1 of 7)	3782	ENSG00000143603	KCNN3	chr1	154808680	154811115
chr1|155261568|155261912	5.87561	2.03106	3.77552	2.64798	1.14985	-0.382656	0.511784	0.00660166	0.0920116	0	2	1	0	Exon (uc001fka.4/5313, exon 10 of 11)	5313	ENSG00000143627	PKLR	chr1	155261568	155261912
chr1|155333619|155334455	5.27029	3.35838	4.29243	4.10474	0.360592	-0.289526	0.0645053	0.00658373	0.0919146	8	10	2	0	Intron (uc001fkt.3/55870, intron 12 of 27)	693140	ENSG00000283701	MIR555	chr1	155333619	155334455
chr1|155338539|155339855	1.88825	1.74328	1.35972	1.62196	0.219314	0.104066	-0.25443	0.00286427	0.0720358	3	6	1	0	Intron (uc001fkt.3/55870, intron 12 of 27)	693140	ENSG00000283701	MIR555	chr1	155338539	155339855
chr1|155471252|155472158	5.59157	2.91497	4.26923	3.48761	0.681016	-0.258759	0.291739	0.000768722	0.0606188	5	5	3	0	Intron (uc001fkt.3/55870, intron 2 of 27)	645676	ENSG00000235919	ASH1L-AS1	chr1	155471252	155472158
chr1|155606709|155607613	3.99909	2.25668	1.65986	2.07028	0.949848	0.124374	-0.318761	0.00385557	0.0782262	5	9	2	3	Exon (uc001flf.3/uc001flf.3, exon 2 of 4)	55154	ENSG00000125459	MSTO1	chr1	155606709	155607613
chr1|155634719|155635316	4.2381	2.66971	3.16563	3.13116	0.436721	-0.230012	0.0157988	0.00385733	0.0782262	7	9	3	0	Intron (uc010pgg.2/55249, intron 4 of 5)	55249	ENSG00000163374	YY1AP1	chr1	155634719	155635316
chr1|155693753|155694604	2.38976	2.03814	1.88945	1.88375	0.343257	0.113646	0.00436171	0.00334864	0.0749895	1	5	1	0	Intron (uc001flr.3/7818, intron 4 of 12)	100129405	#N/A	MSTO2P	chr1	155693753	155694604
chr1|155701787|155702115	6.46836	2.43095	3.87192	3.55543	0.863377	-0.548502	0.123024	0.00349543	0.0760009	1	4	1	0	Exon (uc001flr.3/7818, exon 11 of 13)	100129405	#N/A	MSTO2P	chr1	155701787	155702115
chr1|155875779|155876217	4.87518	1.71611	2.28121	2.13523	1.19106	-0.315248	0.0954056	0.00128762	0.0615193	1	4	0	0	Intron (uc031pqc.1/6016, intron 3 of 5)	6016	ENSG00000143622	RIT1	chr1	155875779	155876217
chr1|155877340|155879571	3.51553	2.51559	2.70681	2.59134	0.440041	-0.0428014	0.062896	0.00353715	0.0762426	12	9	2	0	Promoter (1-2kb)	6016	ENSG00000143622	RIT1	chr1	155877340	155879571
chr1|155935166|155935543	7.81093	4.04391	7.67961	4.92401	0.66566	-0.284083	0.641199	0.00087801	0.0606188	2	4	1	0	Exon (uc001fmr.2/9181, exon 5 of 22)	9181	ENSG00000116584	ARHGEF2	chr1	155935166	155935543
chr1|155956293|155956703	4.19645	2.29989	2.76507	2.63538	0.671157	-0.196445	0.0693056	0.00535303	0.0863323	2	4	0	0	Promoter (2-3kb)	9181	ENSG00000116584	ARHGEF2	chr1	155956293	155956703
chr1|156245646|156246215	5.15872	2.08624	3.4973	3.45867	0.576794	-0.729313	0.0160227	0.00601831	0.0895769	3	6	1	0	Intron (uc001foc.4/23381, intron 4 of 21)	23381	ENSG00000198952	SMG5	chr1	156245646	156246215
chr11|56259733|56260106	5.1786	4.60756	7.33425	9.18552	-0.8268	-0.99536	-0.324713	0.0018794	0.0651372	5	1	1	0	Promoter (<=1kb)	219484	ENSG00000181371	OR5M8	chr11	56259733	56260106
chr1|156533601|156534436	4.55283	2.72099	4.46265	3.6062	0.336282	-0.406348	0.30742	0.00709156	0.0940771	6	5	3	1	Exon (uc001fpf.3/128239, exon 5 of 38)	128239	ENSG00000183856	IQGAP3	chr1	156533601	156534436
chr1|156655805|156656263	4.28698	2.80498	3.44678	2.84417	0.591957	-0.0200154	0.277243	0.00257944	0.0701729	5	3	1	0	Distal Intergenic	10763	ENSG00000132688	NES	chr1	156655805	156656263
chr1|156723434|156724458	2.66958	2.2043	1.85709	2.05597	0.376793	0.100505	-0.146775	0.00534332	0.0862351	1	8	1	0	Promoter (1-2kb)	3068	ENSG00000143321	HDGF	chr1	156723434	156724458
chr1|156950238|156950626	7.0781	2.96202	6.53037	4.81195	0.556742	-0.700042	0.440544	0.00246292	0.0693676	5	7	1	0	Exon (uc001fqn.3/9826, exon 4 of 41)	9826	ENSG00000132694	ARHGEF11	chr1	156950238	156950626
chr11|57295833|57296373	4.15309	3.52433	5.65603	4.18297	-0.0103427	-0.24718	0.435262	0.00176325	0.0643418	0	4	0	0	Promoter (1-2kb)	26519	ENSG00000134809	TIMM10	chr11	57295833	57296373
chr1|157458788|157459068	4.59244	2.21018	2.66693	3.14695	0.545305	-0.509794	-0.238775	0.00746718	0.0956584	0	2	0	0	Distal Intergenic	83416	ENSG00000143297	FCRL5	chr1	157458788	157459068
chr1|157479841|157480046	3.40745	2.89582	1.88802	1.55405	1.13266	0.897938	0.280842	0.00458624	0.0824494	0	2	0	0	Distal Intergenic	83416	ENSG00000143297	FCRL5	chr1	157479841	157480046
chr11|58296804|58297474	3.2459	2.66578	4.35579	4.00222	-0.30218	-0.586241	0.122137	0.00460716	0.0825983	1	3	1	0	Intron (uc001nmw.3/9404, intron 7 of 8)	219968	ENSG00000198283	OR5B21	chr11	58296804	58297474
chr11|58691838|58692221	7.07294	9.96145	10.9141	12.4763	-0.818813	-0.324765	-0.192999	0.00779163	0.0969676	4	5	0	1	Promoter (2-3kb)	92292	ENSG00000166840	GLYATL1	chr11	58691838	58692221
chr11|59228027|59228326	4.6954	7.42844	6.46159	6.72453	-0.518186	0.143626	-0.057544	0.00498663	0.0845628	1	2	0	1	Distal Intergenic	219983	ENSG00000166884	OR4D6	chr11	59228027	59228326
chr1|159448103|159448752	6.19732	5.82099	3.08967	3.15144	0.975635	0.885254	-0.0285548	0.000734706	0.0606188	4	12	0	4	Distal Intergenic	26476	ENSG00000196184	OR10J1	chr1	159448103	159448752
chr1|159573575|159574310	5.38186	4.46525	2.72474	2.82075	0.932027	0.662663	-0.0499602	0.000583639	0.0606188	2	7	2	1	Distal Intergenic	325	ENSG00000132703	APCS	chr1	159573575	159574310
chr1|159794404|159794853	4.02432	2.08272	2.48329	1.98183	1.02191	0.0716344	0.325421	0.000192919	0.0606188	3	7	0	0	Promoter (1-2kb)	56833	ENSG00000158714	SLAMF8	chr1	159794404	159794853
chr11|60115556|60116336	3.83635	4.58439	5.5137	5.92687	-0.627537	-0.370541	-0.104249	0.00315564	0.0738693	5	5	1	4	Distal Intergenic	245802	ENSG00000166926	MS4A6E	chr11	60115556	60116336
chr1|160337095|160337450	4.82154	6.49711	6.07857	7.40266	-0.618549	-0.188245	-0.28431	0.00670417	0.0924858	2	4	0	1	Promoter (<=1kb)	4807	ENSG00000171786	NHLH1	chr1	160337095	160337450
chr11|60385936|60386242	7.12606	9.28626	9.65482	9.20595	-0.369461	0.0125311	0.0686831	0.00311554	0.0735547	1	3	0	1	Promoter (2-3kb)	283197	ENSG00000181995	LINC00301	chr11	60385936	60386242
chr11|60611861|60612760	4.13699	5.16918	5.7633	4.86488	-0.233821	0.0875333	0.244492	0.00397514	0.07886	6	7	1	1	Promoter (2-3kb)	79080	ENSG00000110104	CCDC86	chr11	60611861	60612760
chr11|60631288|60631629	5.35677	2.51975	6.19411	5.3315	0.0068217	-1.08126	0.216356	0.00273125	0.0711885	2	4	1	0	Distal Intergenic	22917	ENSG00000149506	ZP1	chr11	60631288	60631629
chr11|60647357|60647771	4.49042	2.41448	4.67465	4.43447	0.0180905	-0.877048	0.0760977	0.00519016	0.0854599	7	5	1	0	Distal Intergenic	22917	ENSG00000149506	ZP1	chr11	60647357	60647771
chr11|60770558|60770928	5.93302	2.34148	3.85369	2.75201	1.10828	-0.233069	0.485754	0.00595312	0.0892726	4	3	1	0	Intron (uc009yni.3/923, intron 1 of 5)	923	ENSG00000013725	CD6	chr11	60770558	60770928
chr11|60784460|60784871	6.45724	7.42674	9.56215	11.0294	-0.772358	-0.570548	-0.205941	0.00532393	0.0861519	6	2	2	2	Intron (uc001nqp.3/923, intron 9 of 11)	923	ENSG00000013725	CD6	chr11	60784460	60784871
chr1|160975252|160975853	2.38699	2.40608	1.72102	1.34408	0.82857	0.840062	0.35664	0.00521617	0.0855913	7	9	0	1	Intron (uc010pjv.2/50848, intron 1 of 8)	50848	ENSG00000158769	F11R	chr1	160975252	160975853
chr11|61041707|61042142	4.15352	2.60492	3.26001	2.56913	0.693051	0.0199588	0.343595	0.00112825	0.060903	3	3	1	0	Exon (uc001nra.3/220001, exon 12 of 20)	220001	ENSG00000167992	VWCE	chr11	61041707	61042142
chr1|161076757|161077463	3.7113	2.30703	2.8482	2.43213	0.609702	-0.0761848	0.22783	0.00356957	0.0764027	2	6	2	0	Intron (uc001fxu.3/5202, intron 1 of 3)	126823	ENSG00000162755	KLHDC9	chr1	161076757	161077463
chr1|161158183|161158602	4.95206	2.86525	2.99545	2.95112	0.746764	-0.0426016	0.0215086	0.00612297	0.0900523	5	8	0	1	Downstream (<1kb)	9507	ENSG00000158859	ADAMTS4	chr1	161158183	161158602
chr1|161216948|161217391	4.38334	2.12976	3.6279	3.08939	0.504708	-0.536631	0.231812	0.00836863	0.0992861	10	8	2	0	Distal Intergenic	9970	ENSG00000143257	NR1I3	chr1	161216948	161217391
chr11|61233997|61234677	4.26537	2.47834	4.06638	3.61318	0.239402	-0.543895	0.170474	0.0068578	0.0931696	1	3	1	0	Distal Intergenic	220004	ENSG00000162148	PPP1R32	chr11	61233997	61234677
chr1|161292448|161292832	6.00556	3.26302	4.88874	3.60457	0.736473	-0.143618	0.439636	0.00453849	0.0820967	2	4	1	0	Intron (uc001gag.3/6391, intron 1 of 5)	6391	ENSG00000143252	SDHC	chr1	161292448	161292832
chr1|161357896|161358677	3.61137	3.17048	2.73852	2.81516	0.359329	0.171484	-0.0398172	0.00439815	0.0813642	6	3	1	0	Distal Intergenic	257177	ENSG00000188931	CFAP126	chr1	161357896	161358677
chr1|161388198|161388934	2.72952	2.41061	1.87405	2.02649	0.429668	0.250419	-0.11282	0.00495048	0.0843174	1	7	0	0	Distal Intergenic	257177	ENSG00000188931	CFAP126	chr1	161388198	161388934
chr1|162091077|162091561	4.136	2.09481	2.45989	3.03798	0.445125	-0.536292	-0.304517	0.00790523	0.0974389	3	3	2	0	Intron (uc010pkr.1/9722, intron 1 of 7)	100616386	ENSG00000266144	MIR4654	chr1	162091077	162091561
chr1|162120824|162121083	5.74999	2.8207	3.77066	3.53902	0.700211	-0.327295	0.091468	0.00456958	0.0823037	0	2	0	0	Intron (uc010pkr.1/9722, intron 1 of 7)	100616386	ENSG00000266144	MIR4654	chr1	162120824	162121083
chr11|62644331|62644657	4.70619	2.16879	3.53753	2.59847	0.856897	-0.260772	0.445079	0.0070149	0.0937297	1	4	1	0	Exon (uc001nwc.3/6520, exon 3 of 12)	6520	ENSG00000168003	SLC3A2	chr11	62644331	62644657
chr11|63366286|63366785	2.40663	1.85593	1.38334	1.46196	0.719108	0.344238	-0.0797465	0.00675602	0.0927523	0	6	2	0	Intron (uc001nxh.2/11145, intron 1 of 3)	11145	ENSG00000176485	PLA2G16	chr11	63366286	63366785
chr1|163392536|163392960	5.65218	2.98219	4.5224	3.66727	0.624101	-0.298335	0.302382	0.00303961	0.0731652	4	5	2	0	Distal Intergenic	83540	ENSG00000143228	NUF2	chr1	163392536	163392960
chr11|63760990|63761344	5.27524	2.50449	3.50505	2.61976	1.0098	-0.0649202	0.420002	0.00382406	0.0779609	1	4	1	0	Intron (uc001nyf.1/55611, intron 3 of 6)	55611	ENSG00000167770	OTUB1	chr11	63760990	63761344
chr1|163844898|163845191	7.54665	8.58191	10.2926	14.3463	-0.926767	-0.741303	-0.47906	0.00677441	0.0928278	1	2	0	1	Distal Intergenic	83540	ENSG00000143228	NUF2	chr1	163844898	163845191
chr11|63908024|63909126	2.20357	3.05432	3.14414	2.84244	-0.367289	0.103722	0.145535	0.00424854	0.0805154	1	2	0	1	Intron (uc001nyh.3/28992, intron 3 of 10)	28992	ENSG00000133315	MACROD1	chr11	63908024	63909126
chr11|64173619|64173915	5.64528	6.38206	8.10657	9.07139	-0.684279	-0.507302	-0.162233	0.00191245	0.0653225	1	3	0	1	Distal Intergenic	100302280	ENSG00000221273	MIR1237	chr11	64173619	64173915
chr1|164583584|164583973	5.49042	2.12458	2.67299	2.4331	1.17412	-0.195616	0.135661	0.0021625	0.067135	2	5	1	0	Intron (uc001gcs.3/5087, intron 2 of 7)	5087	ENSG00000185630	PBX1	chr1	164583584	164583973
chr1|164633649|164633898	5.94239	2.84804	3.31131	3.63855	0.707679	-0.353397	-0.135962	0.00431091	0.0809177	0	2	0	0	Intron (uc001gcs.3/5087, intron 2 of 7)	5087	ENSG00000185630	PBX1	chr1	164633649	164633898
chr1|164769835|164770350	3.10395	1.95372	1.6549	1.74232	0.833094	0.16521	-0.0742702	0.000571352	0.0606188	2	7	3	0	Intron (uc001gcs.3/5087, intron 4 of 7)	100505795	ENSG00000233693	LOC100505795	chr1	164769835	164770350
chr11|65063798|65066321	2.39562	2.80147	3.39379	3.49313	-0.544121	-0.318338	-0.0416234	0.0013777	0.0621205	6	7	2	3	3' UTR	23649	ENSG00000014138	POLA2	chr11	65063798	65066321
chr1|165430014|165431020	2.39283	2.01981	1.24552	1.22474	0.966243	0.72175	0.0242716	0.00202715	0.0662648	1	9	1	3	Distal Intergenic	6258	ENSG00000143171	RXRG	chr1	165430014	165431020
chr1|165679720|165680378	2.7266	2.13481	1.7657	1.95337	0.481139	0.128141	-0.145726	0.00718856	0.094592	3	5	2	0	Distal Intergenic	440700	ENSG00000215838	LOC440700	chr1	165679720	165680378
chr11|6586062|6586523	3.50254	2.20363	3.94286	3.1768	0.140828	-0.527693	0.311667	0.0038084	0.0778392	4	7	2	0	Promoter (<=1kb)	144132	ENSG00000179532	DNHD1	chr11	6586062	6586523
chr1|166008116|166008585	3.66465	2.63799	1.52327	1.62326	1.17479	0.70055	-0.0917159	0.00349065	0.075993	1	8	2	3	Distal Intergenic	100126349	ENSG00000215952	MIR921	chr1	166008116	166008585
chr18|54185623|54186072	6.47039	2.02037	2.53483	1.96419	1.71991	0.0406826	0.367953	0.00216945	0.0671615	5	13	2	0	Distal Intergenic	9352	ENSG00000091164	TXNL1	chr18	54185623	54186072
chr11|66415392|66416143	2.43738	1.71022	1.37732	1.35359	0.848541	0.337391	0.0250701	0.00505971	0.0848946	2	6	2	0	Intron (uc010rpj.2/5936, intron 2 of 2)	5936	ENSG00000173933	RBM4	chr11	66415392	66416143
chr1|166868151|166868488	3.77824	2.27339	1.97358	1.69731	1.15446	0.421592	0.217563	0.00413589	0.0798678	0	5	1	1	Distal Intergenic	117143	ENSG00000152382	TADA1	chr1	166868151	166868488
chr1|167206725|167207547	3.72505	2.25274	3.35914	3.1635	0.235738	-0.489842	0.0865687	0.00727368	0.0948603	11	8	1	0	Intron (uc010plg.2/5451, intron 1 of 11)	5451	ENSG00000143190	POU2F1	chr1	167206725	167207547
chr1|167303097|167303523	4.11578	1.85798	3.01544	3.13105	0.394523	-0.752906	-0.0542783	0.00212614	0.0670008	4	5	2	0	Intron (uc010plg.2/5451, intron 3 of 11)	5451	ENSG00000143190	POU2F1	chr1	167303097	167303523
chr1|167602993|167603510	2.312	2.28824	1.55839	1.64036	0.49513	0.480221	-0.0739545	0.000236503	0.0606188	4	5	0	1	Intron (uc001gem.3/92241, intron 1 of 6)	92241	ENSG00000198771	RCSD1	chr1	167602993	167603510
chr1|167914813|167915289	4.21973	1.90173	2.71592	3.44004	0.294724	-0.855112	-0.340987	0.00831585	0.0990879	4	5	2	0	Intron (uc001gev.3/55827, intron 1 of 19)	25874	ENSG00000143158	MPC2	chr1	167914813	167915289
chr11|67955582|67956095	4.76512	2.51062	2.95764	3.33954	0.512863	-0.411606	-0.175203	0.00451788	0.0820563	1	5	2	0	Promoter (1-2kb)	51111	ENSG00000110066	KMT5B	chr11	67955582	67956095
chr1|168094946|168096446	3.3382	2.21468	1.77201	2.13402	0.645497	0.053525	-0.268188	0.00323443	0.0743424	3	8	2	1	Intron (uc001gfb.4/23432, intron 2 of 5)	23432	ENSG00000143147	GPR161	chr1	168094946	168096446
chr1|168399315|168400194	4.33521	3.61128	4.83067	5.27434	-0.28289	-0.546481	-0.126767	0.00319334	0.0740797	12	9	2	1	Distal Intergenic	100505918	#N/A	LOC100505918	chr1	168399315	168400194
chr11|68412749|68413711	2.94025	2.37171	1.62712	1.7623	0.738477	0.428465	-0.115142	0.000958425	0.0606188	2	9	2	0	Distal Intergenic	51083	ENSG00000069482	GAL	chr11	68412749	68413711
chr11|68431007|68434011	2.33472	2.5525	1.81796	1.73208	0.430745	0.55941	0.0698149	0.00452611	0.0820866	4	9	1	3	Distal Intergenic	51083	ENSG00000069482	GAL	chr11	68431007	68434011
chr1|168607386|168607728	6.39426	3.05805	4.54542	4.68606	0.448402	-0.615765	-0.0439613	0.00558655	0.0874694	0	3	1	0	Distal Intergenic	6375	ENSG00000143184	XCL1	chr1	168607386	168607728
chr1|16865438|16865747	7.01651	9.79145	10.993	9.50817	-0.438413	0.0423549	0.209346	0.00198302	0.0659316	0	3	0	1	Distal Intergenic	100500876	ENSG00000263811	MIR3675	chr1	16865438	16865747
chr11|68746964|68748586	2.87512	2.30486	2.03516	1.54209	0.898737	0.579789	0.400255	0.00670417	0.0924858	6	9	2	3	Promoter (<=1kb)	116512	ENSG00000172938	MRGPRD	chr11	68746964	68748586
chr1|169083314|169084348	5.39364	2.52026	3.6103	4.21633	0.35527	-0.742419	-0.223869	0.00464505	0.0827781	3	8	3	0	Intron (uc001gfr.1/481, intron 2 of 5)	481	ENSG00000143153	ATP1B1	chr1	169083314	169084348
chr1|169092956|169093480	3.96057	1.80084	2.72173	2.40858	0.717525	-0.419515	0.176339	0.0039679	0.0788455	4	5	2	0	Intron (uc001gfr.1/481, intron 2 of 5)	481	ENSG00000143153	ATP1B1	chr1	169092956	169093480
chr1|231943041|231943371	6.7462	1.99593	3.26132	2.23016	1.59693	-0.160087	0.548307	5.16554e-05	0.0606188	1	3	1	0	Intron (uc010pwg.1/100303453, intron 12 of 12)	27184	#N/A	DISC2	chr1	231943041	231943371
chr11|69343477|69345966	2.58174	3.31044	1.78489	2.06068	0.325227	0.683902	-0.207287	0.00587795	0.0888561	4	9	3	2	Distal Intergenic	595	ENSG00000110092	CCND1	chr11	69343477	69345966
chr11|69543713|69544310	4.43815	2.99617	2.45928	2.48806	0.83494	0.268099	-0.0167819	0.00444647	0.0817076	3	6	0	1	Distal Intergenic	9965	ENSG00000162344	FGF19	chr11	69543713	69544310
chr11|71054495|71056780	3.15948	4.28342	2.64962	2.62106	0.26954	0.708613	0.0156371	0.00674684	0.0927417	4	9	1	3	Distal Intergenic	399923	ENSG00000172900	FLJ42102	chr11	71054495	71056780
chr1|171189772|171190112	1.28072	3.73581	1.88595	8.4799	-2.72709	-1.18263	-2.16875	0.00400788	0.0790965	0	2	1	1	Distal Intergenic	2326	ENSG00000010932	FMO1	chr1	171189772	171190112
chr1|171989398|171989720	5.72062	3.10331	5.63301	4.20823	0.442959	-0.439402	0.420693	0.00276392	0.0714459	0	4	1	0	Intron (uc001gid.5/26052, intron 4 of 14)	100422882	ENSG00000283152	MIR3120	chr1	171989398	171989720
chr1|17200739|17203071	7.04366	7.95136	9.79303	10.8856	-0.628022	-0.453146	-0.152592	0.00726052	0.0948325	11	8	3	4	Exon (uc021ohg.1/uc021ohg.1, exon 1 of 1)	100500876	ENSG00000263811	MIR3675	chr1	17200739	17203071
chr11|72716564|72716903	4.55451	1.72029	2.98517	2.73708	0.734659	-0.669982	0.125176	0.00529498	0.0859473	2	4	1	0	Intron (uc001oth.4/9873, intron 3 of 18)	9873	ENSG00000137478	FCHSD2	chr11	72716564	72716903
chr11|72882274|72883318	3.99085	2.76972	3.11101	3.57484	0.158818	-0.368139	-0.200496	0.00808235	0.0980904	8	11	1	0	Distal Intergenic	9873	ENSG00000137478	FCHSD2	chr11	72882274	72883318
chr11|73081646|73082030	4.97813	2.44495	3.38155	2.4756	1.00782	-0.0179738	0.449905	0.00481284	0.0837833	1	4	1	0	Distal Intergenic	84957	ENSG00000054967	RELT	chr11	73081646	73082030
chr11|73259906|73260608	2.0787	1.59973	1.35744	1.62118	0.358636	-0.0192187	-0.256158	0.00622943	0.0906269	4	8	1	0	Intron (uc001oty.1/23201, intron 1 of 7)	23201	ENSG00000054965	FAM168A	chr11	73259906	73260608
chr11|74419587|74420157	3.67986	2.46021	2.64769	2.05453	0.840841	0.259974	0.365926	0.00772844	0.0967042	3	4	1	0	Intron (uc001ovg.3/25884, intron 2 of 8)	25884	ENSG00000054938	CHRDL2	chr11	74419587	74420157
chr1|175085740|175086145	6.55033	3.72439	5.60395	5.21225	0.329661	-0.484904	0.104537	0.00363199	0.0768631	3	2	2	0	Exon (uc001gkl.1/63923, exon 10 of 19)	63923	ENSG00000120332	TNN	chr1	175085740	175086145
chr1|175190158|175190956	6.52213	6.23448	8.86953	9.41213	-0.529178	-0.594252	-0.0856647	0.00699586	0.0937052	8	8	2	3	Distal Intergenic	9674	ENSG00000235750	KIAA0040	chr1	175190158	175190956
chr1|175423900|175424311	3.72826	1.92531	2.11404	2.30454	0.694027	-0.259385	-0.124475	0.00127817	0.0614912	3	5	1	0	Intron (uc009wwu.1/7143, intron 2 of 22)	7143	ENSG00000116147	TNR	chr1	175423900	175424311
chr1|175425997|175426588	3.91427	2.25755	3.52277	3.52461	0.151283	-0.642705	-0.000752703	0.00559162	0.0874902	6	5	1	0	Intron (uc009wwu.1/7143, intron 2 of 22)	7143	ENSG00000116147	TNR	chr1	175425997	175426588
chr11|76021437|76021918	4.42107	2.68121	3.27581	2.97076	0.57356	-0.147947	0.141018	0.00387849	0.0783069	3	4	1	0	Distal Intergenic	5612	ENSG00000137492	THAP12	chr11	76021437	76021918
chr1|176346285|176347481	5.16382	2.94126	3.17968	2.86044	0.852204	0.0401984	0.152647	0.00416045	0.0800223	6	13	2	2	Distal Intergenic	60676	ENSG00000116183	PAPPA2	chr1	176346285	176347481
chr11|76419427|76419869	3.56934	2.09471	2.00354	2.15403	0.728618	-0.0402854	-0.104486	0.00235809	0.0687373	3	9	1	0	Exon (uc001oxs.4/390226, exon 9 of 21)	390226	#N/A	GUCY2EP	chr11	76419427	76419869
chr1|176500713|176501222	3.88704	2.29094	1.68	1.87261	1.05362	0.290888	-0.156588	0.00334864	0.0749895	4	10	2	2	Intron (uc001gky.1/60676, intron 1 of 4)	60676	ENSG00000116183	PAPPA2	chr1	176500713	176501222
chr11|7659140|7659486	4.28349	1.88967	2.63704	2.58772	0.727106	-0.453546	0.0272376	0.00780574	0.0970915	0	5	1	0	Intron (uc001mfj.5/8495, intron 14 of 23)	8495	ENSG00000166387	PPFIBP2	chr11	7659140	7659486
chr11|76626077|76626644	2.57037	2.01267	2.25185	1.69206	0.603198	0.250333	0.412331	0.00497757	0.0845013	5	8	1	0	Intron (uc010rsg.1/55331, intron 2 of 8)	55331	ENSG00000078124	ACER3	chr11	76626077	76626644
chr11|76912903|76913547	1.83823	1.81908	1.56285	1.20681	0.607111	0.592009	0.372979	0.00457374	0.0823515	1	3	0	0	Promoter (1-2kb)	4647	ENSG00000137474	MYO7A	chr11	76912903	76913547
chr1|176960263|176960767	3.47765	2.06597	1.8657	1.62794	1.09507	0.343777	0.196674	0.00739319	0.0953269	4	8	2	1	Intron (uc001glb.1/460, intron 8 of 22)	574441	ENSG00000202609	MIR488	chr1	176960263	176960767
chr1|177454579|177454936	5.80858	2.39476	3.81886	3.3541	0.792259	-0.486045	0.187214	0.00721465	0.094682	5	5	1	0	Distal Intergenic	57795	ENSG00000198797	BRINP2	chr1	177454579	177454936
chr1|17751963|17752527	3.48999	2.58514	3.99781	2.56444	0.444577	0.0115967	0.640566	0.00404089	0.0793359	5	3	2	0	Exon (uc001bal.3/55920, exon 3 of 12)	55920	ENSG00000179051	RCC2	chr1	17751963	17752527
chr11|77650813|77651198	4.89036	1.97282	3.07718	2.49259	0.972298	-0.337382	0.303964	0.000444974	0.0606188	3	5	0	0	Intron (uc001oys.3/92105, intron 9 of 22)	92105	ENSG00000149262	INTS4	chr11	77650813	77651198
chr1|177950164|177950537	5.2159	3.2009	3.88952	2.82093	0.886745	0.182308	0.463422	0.00424468	0.0805154	3	7	1	0	Intron (uc009wwz.1/89866, intron 1 of 24)	89866	ENSG00000120341	SEC16B	chr1	177950164	177950537
chr11|78947968|78948338	5.32079	5.32123	7.79911	8.57363	-0.688265	-0.688147	-0.136596	0.0044142	0.0814398	6	5	1	0	Intron (uc001ozl.4/26011, intron 2 of 33)	26011	ENSG00000149256	TENM4	chr11	78947968	78948338
chr1|179295851|179296636	2.55082	2.13211	1.74731	1.99646	0.353518	0.0948377	-0.192305	0.00157272	0.063311	6	6	1	0	Intron (uc001gml.3/6646, intron 3 of 15)	6646	ENSG00000057252	SOAT1	chr1	179295851	179296636
chr1|179869073|179869546	5.67556	2.07933	3.62808	3.65437	0.63514	-0.813501	-0.0104182	0.00280594	0.0716958	1	4	1	0	Exon (uc001gnp.2/26092, exon 4 of 10)	26092	ENSG00000143337	TOR1AIP1	chr1	179869073	179869546
chr1|179921941|179922570	2.19753	1.69966	1.43288	1.43154	0.618311	0.247675	0.00134318	0.00288398	0.0722026	3	9	1	0	Promoter (1-2kb)	9857	ENSG00000135837	CEP350	chr1	179921941	179922570
chr1|179931140|179931840	3.63314	1.84871	2.28926	2.52834	0.523025	-0.451673	-0.143309	0.00654801	0.0917845	4	7	1	0	Intron (uc001gnr.1/9857, intron 1 of 4)	9857	ENSG00000135837	CEP350	chr1	179931140	179931840
chr1|18026019|18026844	4.18867	4.6141	5.8025	4.86858	-0.217011	-0.077451	0.253173	0.00409651	0.0795579	0	4	1	0	Distal Intergenic	55160	ENSG00000074964	ARHGEF10L	chr1	18026019	18026844
chr1|180341758|180342096	6.84884	2.35808	5.1388	5.47709	0.322449	-1.2158	-0.0919794	0.00390688	0.0784246	2	4	1	0	Intron (uc001gog.3/84320, intron 6 of 7)	100423032	ENSG00000265435	MIR3121	chr1	180341758	180342096
chr1|180466109|180466407	5.07601	1.96445	3.98932	3.69256	0.459072	-0.910496	0.111522	0.00319188	0.0740797	0	2	0	0	Intron (uc001gog.3/84320, intron 1 of 7)	84320	ENSG00000230124	ACBD6	chr1	180466109	180466407
chr11|80505282|80505662	5.77356	5.38368	8.57369	8.54654	-0.565879	-0.666747	0.00457613	0.00793747	0.0976126	7	7	1	0	Distal Intergenic	100422823	ENSG00000264110	MIR4300	chr11	80505282	80505662
chr11|80724974|80725295	4.90527	4.56559	6.31607	6.44473	-0.393787	-0.49732	-0.0290938	0.00650364	0.0915829	0	4	1	0	Distal Intergenic	100422823	ENSG00000264110	MIR4300	chr11	80724974	80725295
chr1|181323864|181324650	2.16441	2.60733	1.54215	1.31698	0.716742	0.985339	0.227707	0.00565803	0.087777	3	7	0	2	Distal Intergenic	100287948	ENSG00000179452	LINC01699	chr1	181323864	181324650
chr1|181556941|181558572	3.38074	2.78577	2.3923	2.73659	0.304959	0.0256944	-0.193985	0.00378072	0.0777744	4	7	2	1	Intron (uc001gow.3/777, intron 6 of 46)	777	ENSG00000198216	CACNA1E	chr1	181556941	181558572
chr11|81560606|81560888	5.92503	2.25384	4.98888	4.92328	0.2672	-1.12724	0.0190957	0.00343848	0.0755568	0	2	0	0	Distal Intergenic	100422823	ENSG00000264110	MIR4300	chr11	81560606	81560888
chr1|181645775|181646188	2.19402	1.74133	1.10872	1.63328	0.425805	0.0924167	-0.558876	0.00548597	0.0870035	1	2	0	0	Intron (uc001gow.3/777, intron 7 of 46)	777	ENSG00000198216	CACNA1E	chr1	181645775	181646188
chr11|81793104|81793708	2.34746	2.83522	3.43477	3.78713	-0.690006	-0.417648	-0.140891	0.0082224	0.0986881	1	1	0	0	Intron (uc001ozo.1/uc001ozo.1, intron 5 of 7)	100422823	ENSG00000264110	MIR4300	chr11	81793104	81793708
chr1|182270471|182270811	6.2297	2.452	3.14659	2.82606	1.14037	-0.204832	0.154997	0.00693905	0.0935231	2	5	1	0	Distal Intergenic	2752	ENSG00000135821	GLUL	chr1	182270471	182270811
chr1|182315836|182316427	3.8867	2.4199	2.76655	2.67137	0.540964	-0.142635	0.0505097	0.00513151	0.085298	5	6	1	0	Distal Intergenic	2752	ENSG00000135821	GLUL	chr1	182315836	182316427
chr1|182353222|182353913	3.73774	1.84034	3.03061	2.56593	0.542685	-0.47951	0.240125	0.00691395	0.0934545	5	4	2	0	Promoter (<=1kb)	2752	ENSG00000135821	GLUL	chr1	182353222	182353913
chr1|182815529|182815832	7.2035	2.68224	4.03793	4.34734	0.728564	-0.696698	-0.10652	0.00341346	0.075377	0	2	0	0	Intron (uc001gpr.3/1660, intron 3 of 27)	1660	ENSG00000135829	DHX9	chr1	182815529	182815832
chr1|182858047|182858350	5.07195	1.90111	2.67569	2.49674	1.02249	-0.393201	0.0998627	0.00840654	0.0993068	0	3	0	0	Distal Intergenic	1660	ENSG00000135829	DHX9	chr1	182858047	182858350
chr11|82903113|82903425	5.19358	2.56967	3.99733	3.97596	0.385426	-0.629721	0.00773286	0.00618158	0.0903854	0	3	0	0	Promoter (1-2kb)	338699	ENSG00000137494	ANKRD42	chr11	82903113	82903425
chr11|82920646|82921386	5.60709	2.60195	6.4141	5.13742	0.126208	-0.981452	0.320203	0.00473898	0.0832623	6	8	3	0	Exon (uc009yvi.2/338699, exon 4 of 6)	338699	ENSG00000137494	ANKRD42	chr11	82920646	82921386
chr1|183261886|183262402	3.94509	2.68366	2.80663	2.19362	0.846745	0.290887	0.355524	0.00258063	0.0701729	5	7	2	0	Promoter (2-3kb)	23057	ENSG00000157064	NMNAT2	chr1	183261886	183262402
chr11|83312809|83313635	2.0594	1.60304	1.31806	1.78368	0.207371	-0.154041	-0.436441	0.00512918	0.0852809	0	8	1	0	Intron (uc010rsw.1/1740, intron 2 of 10)	1740	ENSG00000150672	DLG2	chr11	83312809	83313635
chr1|183337496|183337857	4.47167	2.89582	2.23092	2.51382	0.830935	0.204093	-0.172242	0.00232485	0.0684953	1	2	1	1	Intron (uc001gqc.2/23057, intron 1 of 10)	23057	ENSG00000157064	NMNAT2	chr1	183337496	183337857
chr11|83508854|83509231	6.40156	1.94178	3.69753	4.1275	0.633158	-1.08789	-0.158704	0.000772993	0.0606188	4	9	1	0	Intron (uc001pai.2/1740, intron 9 of 19)	1740	ENSG00000150672	DLG2	chr11	83508854	83509231
chr1|18575228|18576425	1.72233	2.42963	2.57657	2.73309	-0.666168	-0.169797	-0.0850826	0.00095138	0.0606188	1	6	1	1	Intron (uc001bau.2/84966, intron 2 of 9)	84966	ENSG00000117154	IGSF21	chr1	18575228	18576425
chr1|185920843|185921750	4.06323	4.62625	2.24147	2.58485	0.652546	0.839761	-0.205636	0.00825592	0.0988243	4	7	2	3	Intron (uc001grq.1/83872, intron 11 of 106)	83872	ENSG00000143341	HMCN1	chr1	185920843	185921750
chr1|18646588|18647376	6.47178	10.0099	10.336	10.3666	-0.679702	-0.0505096	-0.00426494	0.00840654	0.0993068	7	10	2	5	Intron (uc001bau.2/84966, intron 3 of 9)	84966	ENSG00000117154	IGSF21	chr1	18646588	18647376
chr1|186687170|186687824	3.277	3.01997	2.17877	2.2614	0.535161	0.41732	-0.0537062	0.0060842	0.089842	0	6	1	2	Distal Intergenic	5743	ENSG00000073756	PTGS2	chr1	186687170	186687824
chr1|18678543|18679741	5.3847	7.90978	7.81	8.64411	-0.682852	-0.12808	-0.146396	0.00357772	0.0764574	5	6	2	4	Intron (uc001bau.2/84966, intron 4 of 9)	84966	ENSG00000117154	IGSF21	chr1	18678543	18679741
chr11|8680037|8680730	3.65933	2.55966	4.20165	5.06426	-0.468772	-0.984396	-0.269395	0.00620686	0.0904879	3	5	2	0	Promoter (<=1kb)	9866	ENSG00000166436	TRIM66	chr11	8680037	8680730
chr11|8692555|8692823	3.45692	4.34807	5.80945	6.39513	-0.887485	-0.556598	-0.138572	0.000697658	0.0606188	1	2	0	1	Promoter (<=1kb)	9866	ENSG00000166436	TRIM66	chr11	8692555	8692823
chr1|187518088|187518646	4.86247	1.99815	3.14354	3.21646	0.596215	-0.686807	-0.0330837	0.00628049	0.0907839	4	3	1	0	Distal Intergenic	5321	ENSG00000116711	PLA2G4A	chr1	187518088	187518646
chr11|88672441|88672733	6.3398	4.90011	8.83892	9.61226	-0.600439	-0.972063	-0.121006	0.00343848	0.0755568	1	1	0	1	Intron (uc001pcq.3/2915, intron 1 of 8)	2915	ENSG00000168959	GRM5	chr11	88672441	88672733
chr11|89950950|89951326	4.70303	1.66603	3.29045	3.68659	0.351301	-1.14588	-0.164005	0.00859086	0.0999915	4	8	1	0	Exon (uc001pdg.2/26973, exon 2 of 11)	26973	ENSG00000110172	CHORDC1	chr11	89950950	89951326
chr1|19019204|19020810	2.97287	3.24785	3.74545	4.10543	-0.465679	-0.33805	-0.132397	0.00748748	0.0957533	4	6	1	0	Intron (uc001bay.3/5081, intron 5 of 7)	5081	ENSG00000009709	PAX7	chr1	19019204	19020810
chr1|19085301|19085637	5.61013	5.04855	7.65005	6.38996	-0.187774	-0.339939	0.25966	0.0070149	0.0937297	1	5	1	1	Distal Intergenic	80834	ENSG00000179002	TAS1R2	chr1	19085301	19085637
chr1|191267388|191267694	5.77547	4.18946	7.41149	7.76486	-0.427022	-0.890194	-0.0671959	0.00516193	0.0853475	0	3	0	0	Distal Intergenic	440704	ENSG00000231175	LINC01720	chr1	191267388	191267694
chr1|191477814|191478108	6.91146	5.58684	9.58479	8.57451	-0.311064	-0.618022	0.160692	0.00791954	0.097505	1	2	0	0	Distal Intergenic	64407	ENSG00000150681	RGS18	chr1	191477814	191478108
chr1|19186786|19187803	4.18024	4.31717	5.28664	5.31989	-0.34781	-0.30131	-0.00904563	0.00733984	0.0951083	5	6	1	0	Promoter (<=1kb)	80834	ENSG00000179002	TAS1R2	chr1	19186786	19187803
chr1|19190344|19190923	4.88532	6.90618	6.87918	6.74709	-0.465812	0.0336226	0.0279717	0.00400423	0.0790965	4	6	3	4	Distal Intergenic	80834	ENSG00000179002	TAS1R2	chr1	19190344	19190923
chr11|92335398|92335639	4.55601	2.11679	2.26639	2.54486	0.840183	-0.265707	-0.167193	0.00731662	0.0950455	0	2	0	0	Intron (uc001pdj.4/120114, intron 2 of 24)	120114	ENSG00000165323	FAT3	chr11	92335398	92335639
chr1|19236719|19237565	3.84391	3.15153	5.55818	4.42458	-0.202964	-0.489487	0.329072	0.00408532	0.0795579	4	4	2	0	Exon (uc001bbd.2/126917, exon 8 of 9)	8659	ENSG00000159423	ALDH4A1	chr1	19236719	19237565
chr1|193094429|193094868	4.8151	2.15864	3.04989	2.90364	0.729704	-0.427735	0.0708964	0.00227846	0.0679992	5	8	3	0	Intron (uc001gtb.3/79577, intron 2 of 16)	79577	ENSG00000134371	CDC73	chr1	193094429	193094868
chr1|193249401|193249769	4.73038	3.87598	5.76623	6.68266	-0.498467	-0.785862	-0.212794	0.00784113	0.0971582	4	1	1	0	Distal Intergenic	8707	ENSG00000162630	B3GALT2	chr1	193249401	193249769
chr11|93529206|93530249	4.17041	2.21248	3.53744	2.97224	0.488638	-0.425889	0.251155	0.00796264	0.0976126	8	10	1	0	Exon (uc001pem.4/9440, exon 7 of 12)	9440	ENSG00000042429	MED17	chr11	93529206	93530249
chr11|93883338|93883681	7.91229	3.35104	5.53459	5.17102	0.613645	-0.62584	0.0980266	0.00328204	0.0746573	2	6	1	0	Intron (uc001peq.3/24145, intron 1 of 4)	24145	ENSG00000110218	PANX1	chr11	93883338	93883681
chr11|94165493|94165831	4.632	2.15949	4.04521	3.41875	0.438169	-0.662774	0.242749	0.00828583	0.0989938	2	2	1	0	Intron (uc001peu.2/4361, intron 18 of 19)	10888	ENSG00000123901	GPR83	chr11	94165493	94165831
chr1|19437000|19437460	4.86677	3.96833	6.14209	6.22721	-0.355622	-0.650056	-0.0198577	0.00587795	0.0888561	9	9	0	0	Exon (uc001bbi.3/23352, exon 79 of 106)	23352	ENSG00000127481	UBR4	chr1	19437000	19437460
chr1|19481247|19482244	5.37358	4.30956	7.70671	6.30701	-0.231074	-0.549415	0.289159	0.00168645	0.0639341	9	9	3	1	Promoter (1-2kb)	23352	ENSG00000127481	UBR4	chr1	19481247	19482244
chr11|95150895|95151221	4.41557	2.03695	3.66344	3.28724	0.425723	-0.690464	0.156323	0.003798	0.0778392	0	2	1	0	Distal Intergenic	143686	ENSG00000149212	SESN3	chr11	95150895	95151221
chr1|195206145|195206457	7.36449	5.06276	8.77559	11.5236	-0.645936	-1.1866	-0.393026	0.000882885	0.0606188	0	3	0	0	Distal Intergenic	343450	ENSG00000162687	KCNT2	chr1	195206145	195206457
chr1|195215686|195215980	4.78026	2.48807	5.39579	5.17206	-0.113653	-1.05571	0.0610944	0.00809332	0.0981324	0	2	0	0	Distal Intergenic	343450	ENSG00000162687	KCNT2	chr1	195215686	195215980
chr11|95620856|95621205	5.32893	1.87854	3.77225	3.64233	0.548985	-0.955247	0.0505628	0.00226805	0.0679553	1	4	1	0	Intron (uc001pfs.3/8898, intron 3 of 16)	8898	ENSG00000087053	MTMR2	chr11	95620856	95621205
chr11|95847853|95848372	4.0986	2.15854	2.32825	2.63001	0.640064	-0.285015	-0.175824	0.00247309	0.0694465	1	8	2	0	Intron (uc001pfw.1/84441, intron 1 of 4)	8898	ENSG00000087053	MTMR2	chr11	95847853	95848372
chr1|195917273|195917918	4.86395	2.93812	3.34853	2.73875	0.82861	0.101372	0.290011	0.00443838	0.0816278	0	10	1	1	Distal Intergenic	343450	ENSG00000162687	KCNT2	chr1	195917273	195917918
chr1|1971336|1971972	4.54426	4.84777	3.48089	3.16042	0.52393	0.617205	0.139342	0.00320064	0.0740943	7	8	1	1	Distal Intergenic	5590	ENSG00000067606	PRKCZ	chr1	1971336	1971972
chr1|19732253|19733287	3.76384	3.64497	4.60335	4.85182	-0.366319	-0.412616	-0.0758416	0.00338244	0.0751848	0	5	2	0	Intron (uc010ocz.2/832, intron 2 of 8)	832	ENSG00000077549	CAPZB	chr1	19732253	19733287
chr1|197754383|197754742	4.37455	2.27092	4.0729	2.25462	0.956251	0.0103921	0.853172	0.0017984	0.0645693	4	3	1	0	Distal Intergenic	163486	ENSG00000213047	DENND1B	chr1	197754383	197754742
chr1|198274534|198275101	4.34068	2.24552	4.11591	3.58763	0.274889	-0.675984	0.19818	0.00816683	0.0984975	3	5	2	0	Intron (uc001gun.4/140609, intron 9 of 9)	140609	ENSG00000151414	NEK7	chr1	198274534	198275101
chr1|199711301|199711675	5.79984	2.57241	4.58011	2.89762	1.00115	-0.171745	0.660516	0.00309285	0.0734222	7	8	1	0	Distal Intergenic	2494	ENSG00000116833	NR5A2	chr1	199711301	199711675
chr1|19979025|19979407	4.92458	6.65048	7.73806	8.45547	-0.779884	-0.346426	-0.127914	0.000207247	0.0606188	2	2	1	1	Intron (uc009vpl.2/100532736, intron 1 of 3)	4681	ENSG00000158747	NBL1	chr1	19979025	19979407
chr1|200055424|200055890	3.64605	1.8157	1.73941	1.62993	1.16152	0.155718	0.0937833	0.00144253	0.0624307	0	6	1	0	Intron (uc001gvb.4/2494, intron 5 of 7)	2494	ENSG00000116833	NR5A2	chr1	200055424	200055890
chr1|200077053|200077347	4.11966	2.04188	3.0629	3.5769	0.203817	-0.808807	-0.223812	0.0055461	0.0873256	1	2	0	0	Intron (uc001gvb.4/2494, intron 5 of 7)	2494	ENSG00000116833	NR5A2	chr1	200077053	200077347
chr1|200316303|200317431	1.68823	1.73454	1.19953	1.16038	0.540914	0.579953	0.0478732	0.00676521	0.0927523	2	8	0	0	Intron (uc001gvd.1/554279, intron 4 of 4)	554279	ENSG00000203721	LINC00862	chr1	200316303	200317431
chr1|200424683|200425222	4.48096	2.34981	3.79208	3.14721	0.509736	-0.421526	0.26892	0.00383629	0.0779945	6	5	1	0	Intron (uc010ppi.1/uc010ppi.1, intron 1 of 1)	23528	ENSG00000162702	ZNF281	chr1	200424683	200425222
chr1|200496032|200496495	3.91426	2.79109	2.55488	2.59699	0.591899	0.103988	-0.0235867	0.00839136	0.0993068	7	6	1	1	Distal Intergenic	9928	ENSG00000118193	KIF14	chr1	200496032	200496495
chr1|200977953|200978554	7.49439	4.79002	7.55131	5.19261	0.529351	-0.116428	0.540267	0.00640706	0.0912093	3	7	1	0	Exon (uc001gvr.2/23046, exon 2 of 34)	23046	ENSG00000116852	KIF21B	chr1	200977953	200978554
chr1|201157554|201158098	3.05691	1.99607	1.83294	1.85703	0.719079	0.104163	-0.0188346	0.00518073	0.0854381	1	4	1	0	Promoter (1-2kb)	91156	ENSG00000163395	IGFN1	chr1	201157554	201158098
chr1|201296137|201297136	2.16626	2.5592	1.56487	1.55494	0.478342	0.71883	0.00918158	0.00811531	0.0982786	2	4	1	1	Intron (uc001gwd.3/5317, intron 13 of 14)	7139	ENSG00000118194	TNNT2	chr1	201296137	201297136
chr1|201638967|201639365	5.01698	2.36775	3.28718	3.19331	0.651768	-0.431531	0.0418008	0.00506892	0.0849445	1	2	1	0	Intron (uc001gwu.3/89796, intron 1 of 28)	89796	ENSG00000134369	NAV1	chr1	201638967	201639365
chr1|201849492|201849792	5.4408	2.45877	3.05136	2.95602	0.880162	-0.26572	0.0457978	0.00683918	0.093083	0	2	0	1	3' UTR	149345	ENSG00000198892	SHISA4	chr1	201849492	201849792
chr1|201880362|201880650	5.48313	3.50254	4.56988	7.3407	-0.420918	-1.06752	-0.683761	0.00587795	0.0888561	0	3	0	0	Intron (uc010ppu.2/25802, intron 1 of 3)	149345	ENSG00000198892	SHISA4	chr1	201880362	201880650
chr1|202109910|202110488	4.35398	2.17994	2.59039	2.65748	0.712276	-0.28577	-0.0368895	0.0017984	0.0645693	1	5	0	0	Intron (uc001gxk.2/127829, intron 1 of 6)	127829	ENSG00000143862	ARL8A	chr1	202109910	202110488
chr1|202260375|202261395	2.00195	1.80077	1.39442	1.33759	0.581774	0.428981	0.0600365	0.00676521	0.0927523	3	3	1	0	Intron (uc001gxu.3/59352, intron 6 of 17)	29089	ENSG00000077152	UBE2T	chr1	202260375	202261395
chr1|202671851|202672768	3.56669	3.1281	2.38824	2.16248	0.7219	0.532602	0.143265	0.00593424	0.0891867	2	5	2	2	Intron (uc009xaf.3/127833, intron 1 of 6)	127833	ENSG00000143858	SYT2	chr1	202671851	202672768
chr1|202761464|202761982	3.09999	1.78828	1.9087	1.57717	0.974919	0.181229	0.275249	0.00552097	0.0871819	7	5	1	0	Intron (uc001gyf.3/10765, intron 1 of 26)	10765	ENSG00000117139	KDM5B	chr1	202761464	202761982
chr1|202816410|202816763	3.17979	2.47388	2.10045	2.67951	0.246966	-0.115192	-0.351267	0.00761046	0.0962265	0	4	0	0	Distal Intergenic	148709	ENSG00000234996	LOC148709	chr1	202816410	202816763
chr1|203330693|203331054	5.61141	3.00282	3.76715	3.13585	0.839506	-0.0625368	0.264616	0.000573735	0.0606188	2	4	1	0	Distal Intergenic	2331	ENSG00000122176	FMOD	chr1	203330693	203331054
chr1|203482894|203483746	3.88429	3.72803	2.38415	2.37504	0.709701	0.650462	0.00552293	0.000358193	0.0606188	6	12	1	1	Distal Intergenic	26254	ENSG00000188770	OPTC	chr1	203482894	203483746
chr1|203524003|203524222	3.88468	2.694	1.86989	2.14129	0.859315	0.33127	-0.195525	0.00618158	0.0903854	0	2	0	0	Distal Intergenic	26254	ENSG00000188770	OPTC	chr1	203524003	203524222
chr1|203554749|203555266	1.84042	1.80425	1.13142	1.48094	0.313519	0.28488	-0.38838	0.00634634	0.091019	1	2	1	0	Distal Intergenic	493	ENSG00000058668	ATP2B4	chr1	203554749	203555266
chr1|204047236|204048636	4.17554	4.51323	3.38681	3.17149	0.396803	0.509003	0.0947665	0.00490343	0.0841829	6	10	1	3	Intron (uc001hal.3/9580, intron 1 of 6)	9580	ENSG00000143842	SOX13	chr1	204047236	204048636
chr1|204056210|204056888	4.65334	3.58855	3.06839	3.06628	0.601779	0.226913	0.000995342	0.00255946	0.0700343	6	6	1	2	Intron (uc001hal.3/9580, intron 1 of 6)	9580	ENSG00000143842	SOX13	chr1	204056210	204056888
chr1|204667524|204668199	3.8244	2.82389	2.14411	2.22989	0.778261	0.340714	-0.0565907	0.000632542	0.0606188	5	12	0	3	Intron (uc001hbd.2/4194, intron 11 of 11)	10446	ENSG00000170382	LRRN2	chr1	204667524	204668199
chr1|20495236|20495538	5.94235	8.06027	8.43431	10.5962	-0.834447	-0.394652	-0.329211	0.00101387	0.0606784	1	2	0	0	Intron (uc009vpq.1/391013, intron 2 of 2)	391013	ENSG00000187980	PLA2G2C	chr1	20495236	20495538
chr1|204956048|204957584	3.80366	2.60915	3.18874	2.86029	0.411224	-0.132581	0.156825	0.00603472	0.0896052	6	6	2	0	Promoter (<=1kb)	23114	ENSG00000163531	NFASC	chr1	204956048	204957584
chr1|205025385|205025926	3.11831	2.38603	1.86769	1.86348	0.742766	0.356612	0.00325382	0.00423309	0.0804746	0	4	1	0	Promoter (1-2kb)	6900	ENSG00000184144	CNTN2	chr1	205025385	205025926
chr1|205217391|205217745	7.13967	4.45986	4.74758	4.5141	0.66142	-0.0174379	0.0727547	0.00330309	0.0747097	0	4	1	0	Promoter (1-2kb)	9911	ENSG00000133069	TMCC2	chr1	205217391	205217745
chr1|205340700|205341386	4.11401	2.09273	2.99254	3.09116	0.4124	-0.562763	-0.0467763	0.00610079	0.0899203	4	8	2	0	Promoter (<=1kb)	284576	ENSG00000226235	LEMD1-AS1	chr1	205340700	205341386
chr1|205836177|205836588	4.67254	2.04624	4.04723	3.90048	0.260553	-0.930676	0.0532835	0.00831585	0.0990879	5	4	2	0	Intron (uc001hdk.1/284581, intron 1 of 2)	284581	#N/A	LOC284581	chr1	205836177	205836588
chr1|206227643|206227962	4.97377	4.1383	3.57339	2.78383	0.83727	0.571966	0.360221	0.00761046	0.0962265	0	2	1	0	Intron (uc001hds.2/553, intron 1 of 1)	553	ENSG00000198049	AVPR1B	chr1	206227643	206227962
chr1|20649723|20650058	5.42534	6.11318	8.17224	6.72129	-0.309023	-0.136814	0.281995	0.00729017	0.0949919	3	2	1	1	Exon (uc001bdd.2/127731, exon 8 of 15)	127731	ENSG00000158816	VWA5B1	chr1	20649723	20650058
chr1|206707755|206708462	4.00816	2.60246	2.34583	1.8267	1.1337	0.510641	0.360864	0.00309002	0.0734222	7	11	0	2	Intron (uc001hec.1/83593, intron 1 of 3)	83593	ENSG00000266094	RASSF5	chr1	206707755	206708462
chr1|206835571|206836055	3.22064	2.34853	1.93227	2.38881	0.431051	-0.0245391	-0.305997	0.00698952	0.0936779	1	7	2	1	Intron (uc001hek.3/8444, intron 3 of 3)	9261	ENSG00000162889	MAPKAPK2	chr1	206835571	206836055
chr1|207793443|207793746	7.07931	3.56303	6.68623	5.39704	0.391438	-0.599064	0.309024	0.00708193	0.0940715	0	2	0	0	Intron (uc001hfx.3/1378, intron 43 of 46)	1379	ENSG00000197721	CR1L	chr1	207793443	207793746
chr1|208225531|208226005	5.42789	2.88298	3.72316	3.87887	0.484755	-0.428077	-0.0591115	0.00216449	0.067135	3	4	3	0	Exon (uc001hgz.3/5362, exon 15 of 32)	5362	ENSG00000076356	PLXNA2	chr1	208225531	208226005
chr1|208767184|208767592	5.87189	2.23247	3.52364	3.97387	0.563281	-0.831902	-0.173476	0.00351462	0.0760841	4	7	1	1	Distal Intergenic	5362	ENSG00000076356	PLXNA2	chr1	208767184	208767592
chr1|209140574|209141018	6.04035	2.15955	2.86073	3.09976	0.962475	-0.521426	-0.115772	0.00129594	0.0615399	4	11	2	0	Distal Intergenic	642587	ENSG00000230937	MIR205HG	chr1	209140574	209141018
chr1|209160908|209161635	3.07989	1.87461	1.76136	2.06673	0.575532	-0.140756	-0.230661	0.0028486	0.0718906	3	8	2	0	Distal Intergenic	642587	ENSG00000230937	MIR205HG	chr1	209160908	209161635
chr1|20983731|20985510	3.72101	3.32309	4.7967	4.26745	-0.197681	-0.360851	0.168669	0.000994434	0.0606188	6	5	3	0	Promoter (2-3kb)	1650	ENSG00000244038	DDOST	chr1	20983731	20985510
chr1|210060353|210061013	4.61909	4.12216	2.86786	3.07558	0.58675	0.422543	-0.100882	0.00414154	0.0798678	4	8	2	2	Distal Intergenic	255928	ENSG00000143469	SYT14	chr1	210060353	210061013
chr12|101038000|101039996	3.69553	3.92004	5.18116	4.55897	-0.302924	-0.217839	0.184568	0.00267194	0.0707141	6	5	4	1	Distal Intergenic	283431	ENSG00000139354	GAS2L3	chr12	101038000	101039996
chr12|101480471|101480801	6.79123	9.11544	11.2142	10.0833	-0.570217	-0.145578	0.153362	0.00167795	0.0639169	1	3	1	1	Exon (uc001thw.2/121601, exon 16 of 27)	121601	ENSG00000151572	ANO4	chr12	101480471	101480801
chr12|101787560|101787957	4.53949	2.44116	4.36159	4.13582	0.134359	-0.760605	0.0766813	0.00732656	0.0950455	1	7	1	0	3' UTR	400	ENSG00000120805	ARL1	chr12	101787560	101787957
chr12|102611432|102611779	4.02505	3.96525	5.82476	6.18708	-0.620251	-0.641847	-0.0870585	0.00164816	0.0637323	0	2	1	0	Exon (uc031qjh.1/uc031qjh.1, exon 1 of 1)	5367	ENSG00000183395	PMCH	chr12	102611432	102611779
chr1|210285217|210285974	2.06853	2.088	1.29791	1.35102	0.61456	0.628078	-0.0578577	0.00584603	0.0887677	1	3	1	1	Intron (uc001hhs.5/255928, intron 7 of 9)	255928	ENSG00000143469	SYT14	chr1	210285217	210285974
chr12|103924059|103924395	5.11228	8.00044	8.42703	9.69358	-0.923063	-0.276951	-0.202006	0.00389266	0.0784234	1	1	1	0	Distal Intergenic	374470	ENSG00000179088	C12orf42	chr12	103924059	103924395
chr12|103973694|103974274	4.59654	6.96464	6.80685	7.02846	-0.612661	-0.0131596	-0.0462217	0.00503905	0.0848478	7	6	2	2	Distal Intergenic	55576	ENSG00000136011	STAB2	chr12	103973694	103974274
chr12|104443618|104444889	4.36488	6.24252	7.08548	7.15143	-0.71229	-0.196104	-0.0133662	0.000368301	0.0606188	3	8	2	5	Promoter (<=1kb)	83468	ENSG00000120820	GLT8D2	chr12	104443618	104444889
chr12|104658953|104660870	3.21221	4.22225	4.5646	4.20943	-0.390057	0.0043856	0.116862	0.00502761	0.084752	8	7	1	3	Intron (uc021rcx.2/7296, intron 3 of 16)	7296	ENSG00000198431	TXNRD1	chr12	104658953	104660870
chr12|104811684|104812014	4.60433	2.96605	5.70167	5.00842	-0.121364	-0.755815	0.18703	0.00189498	0.0651934	3	2	1	0	Distal Intergenic	50515	ENSG00000171310	CHST11	chr12	104811684	104812014
chr12|105776679|105777859	3.76282	4.17993	5.02411	5.05574	-0.426108	-0.274445	-0.00905584	0.00808235	0.0980904	9	8	0	4	Distal Intergenic	387882	ENSG00000235162	C12orf75	chr12	105776679	105777859
chr12|105779226|105779539	4.53876	2.42022	4.88527	4.11667	0.140819	-0.766339	0.246961	0.00574605	0.0881672	1	4	0	0	Distal Intergenic	387882	ENSG00000235162	C12orf75	chr12	105779226	105779539
chr12|1062196|1062589	4.8357	3.76037	2.87109	2.78097	0.798139	0.435288	0.0460137	0.00767965	0.0964927	1	6	0	1	Intron (uc001qiu.1/5893, intron 1 of 11)	5893	ENSG00000002016	RAD52	chr12	1062196	1062589
chr12|107211191|107211529	4.12535	3.61564	5.75205	5.48133	-0.410007	-0.600274	0.0695517	0.00457374	0.0823515	2	0	1	0	Intron (uc001tlw.3/55188, intron 3 of 8)	55188	ENSG00000111785	RIC8B	chr12	107211191	107211529
chr12|107699868|107700246	5.51708	5.14089	9.73029	8.13823	-0.56081	-0.662695	0.257768	0.000990774	0.0606188	8	6	1	2	Distal Intergenic	121551	ENSG00000151136	BTBD11	chr12	107699868	107700246
chr12|108674510|108675215	2.96269	2.87132	1.77509	1.91857	0.626873	0.58168	-0.112143	0.00205428	0.0664751	1	8	2	0	Distal Intergenic	1240	ENSG00000174600	CMKLR1	chr12	108674510	108675215
chr12|108918014|108918373	4.76134	4.66175	7.41657	6.05025	-0.345627	-0.376125	0.293756	0.00100875	0.0606784	3	3	1	0	Exon (uc001tmy.1/9733, exon 11 of 12)	11153	ENSG00000198855	FICD	chr12	108918014	108918373
chr12|109020735|109021524	3.52624	3.04519	4.37722	3.81999	-0.115437	-0.327036	0.196449	0.00215657	0.0670941	3	5	3	0	Intron (uc010sxe.2/6404, intron 1 of 1)	6404	ENSG00000110876	SELPLG	chr12	109020735	109021524
chr12|109248336|109248622	4.11771	5.81794	6.7954	6.30978	-0.615747	-0.117081	0.10697	0.00154337	0.0630458	1	3	0	1	Promoter (2-3kb)	54434	ENSG00000084112	SSH1	chr12	109248336	109248622
chr12|1093452|1093925	3.35207	2.07057	2.59133	2.22852	0.588965	-0.106061	0.217605	0.00589398	0.0889174	3	5	2	0	Intron (uc001qiu.1/5893, intron 1 of 11)	5893	ENSG00000002016	RAD52	chr12	1093452	1093925
chr12|109459955|109460466	3.86196	2.32264	2.57825	2.20409	0.809151	0.0755847	0.226211	0.00660765	0.0920244	3	6	1	0	Promoter (<=1kb)	84749	ENSG00000135093	USP30	chr12	109459955	109460466
chr1|210955516|210955790	4.89373	2.15357	2.81378	3.07156	0.671962	-0.512239	-0.126462	0.0018794	0.0651372	0	2	0	0	Intron (uc001hib.2/3756, intron 9 of 10)	55733	ENSG00000054392	HHAT	chr1	210955516	210955790
chr12|109691795|109692111	3.40722	4.08442	4.90355	3.16915	0.104498	0.366033	0.629729	0.00752145	0.0959099	0	1	1	0	Exon (uc001tob.3/32, exon 44 of 53)	32	ENSG00000076555	ACACB	chr12	109691795	109692111
chr12|109901097|109901432	6.52835	9.55494	12.1534	13.21	-1.01684	-0.467309	-0.120265	0.00014475	0.0606188	1	2	1	1	Intron (uc009zvi.1/83892, intron 1 of 5)	83892	ENSG00000110906	KCTD10	chr12	109901097	109901432
chr12|110051179|110052280	5.22906	8.03298	7.88506	9.52195	-0.864705	-0.245322	-0.272136	6.69923e-05	0.0606188	7	6	3	2	Distal Intergenic	4598	ENSG00000110921	MVK	chr12	110051179	110052280
chr12|110110176|110110542	5.35309	4.10978	6.8431	6.76212	-0.337104	-0.718414	0.0171741	0.00629475	0.0908011	1	2	1	0	Distal Intergenic	84915	ENSG00000139438	FAM222A	chr12	110110176	110110542
chr12|110172283|110173428	3.23232	3.88318	4.20816	4.91301	-0.604035	-0.339369	-0.223416	0.00372765	0.0774088	2	4	2	3	Exon (uc031qjl.1/84983, exon 3 of 4)	84915	ENSG00000139438	FAM222A	chr12	110172283	110173428
chr12|110385177|110385957	3.3181	4.09519	4.34243	4.65304	-0.487817	-0.184243	-0.0996711	0.00791954	0.097505	7	7	0	4	3' UTR	84260	ENSG00000139437	TCHP	chr12	110385177	110385957
chr12|110808143|110809121	3.52687	3.26702	4.27515	3.09387	0.188973	0.078561	0.466562	0.0021467	0.0670902	12	11	2	0	Downstream (1-2kb)	488	ENSG00000174437	ATP2A2	chr12	110808143	110809121
chr1|211088437|211088859	4.3611	2.02636	3.48305	2.8211	0.628434	-0.477364	0.304096	0.00509664	0.0850037	5	4	2	0	Intron (uc001hib.2/3756, intron 7 of 10)	3756	ENSG00000143473	KCNH1	chr1	211088437	211088859
chr12|111016808|111017743	2.27896	2.75625	1.62519	1.78741	0.350506	0.624836	-0.137261	0.00313266	0.0737035	2	5	0	1	Intron (uc001trh.1/160760, intron 1 of 5)	160760	ENSG00000196850	PPTC7	chr12	111016808	111017743
chr12|111182661|111183020	5.6037	3.18277	3.49286	4.09043	0.454126	-0.361969	-0.227846	0.00167103	0.0638025	1	4	1	0	Promoter (1-2kb)	5501	ENSG00000186298	PPP1CC	chr12	111182661	111183020
chr12|111307465|111307789	3.87877	2.83885	4.68347	4.6978	-0.276384	-0.726676	-0.00440777	0.00781281	0.0970936	0	2	1	0	Intron (uc009zvt.1/160762, intron 2 of 3)	160762	ENSG00000173093	CCDC63	chr12	111307465	111307789
chr12|111403659|111404688	2.81666	3.41618	4.00245	4.37603	-0.635637	-0.357238	-0.128739	0.000990317	0.0606188	2	3	1	0	Distal Intergenic	100131138	ENSG00000185847	LINC01405	chr12	111403659	111404688
chr12|111591151|111592581	2.4232	3.12683	3.18958	3.65167	-0.591644	-0.223856	-0.195189	0.00184606	0.0648137	5	7	1	1	Intron (uc001tsa.2/23316, intron 1 of 21)	23316	ENSG00000111249	CUX2	chr12	111591151	111592581
chr12|111707235|111707944	4.1273	4.20146	5.92027	5.54672	-0.426434	-0.400744	0.0940283	0.0014007	0.0622804	4	3	4	1	Intron (uc001tsa.2/23316, intron 4 of 21)	144717	ENSG00000198324	FAM109A	chr12	111707235	111707944
chr12|112240239|112240541	4.79754	3.00722	6.08726	4.80096	-0.00102916	-0.674892	0.342469	0.00363696	0.0769235	0	3	0	0	Intron (uc001tst.3/217, intron 11 of 12)	217	ENSG00000111275	ALDH2	chr12	112240239	112240541
chr12|112260142|112261235	4.91096	4.46849	6.2296	6.79936	-0.469395	-0.605613	-0.12626	0.00351462	0.0760841	9	11	4	3	Distal Intergenic	51275	ENSG00000234608	MAPKAPK5-AS1	chr12	112260142	112261235
chr12|112571466|112572110	2.78081	2.90169	3.66916	3.68365	-0.405631	-0.344244	-0.00568711	0.00789451	0.0974389	2	3	0	0	Intron (uc009zwb.2/10906, intron 2 of 4)	10906	ENSG00000135148	TRAFD1	chr12	112571466	112572110
chr12|112630918|112631624	4.1326	3.10545	5.00401	4.6115	-0.158188	-0.570436	0.117848	0.00814839	0.0984568	5	8	3	0	Exon (uc021reb.1/283450, exon 57 of 76)	283450	ENSG00000173064	HECTD4	chr12	112630918	112631624
chr12|112657237|112657566	6.99938	6.62544	10.3107	9.03495	-0.36829	-0.447501	0.190548	0.000242627	0.0606188	1	1	1	1	Exon (uc021reb.1/283450, exon 45 of 76)	283450	ENSG00000173064	HECTD4	chr12	112657237	112657566
chr12|113709537|113711517	3.91611	4.74804	5.94599	6.2201	-0.667516	-0.389606	-0.0650215	9.57172e-05	0.0606188	8	12	4	4	Exon (uc001tuw.3/53373, exon 8 of 28)	53373	ENSG00000186815	TPCN1	chr12	113709537	113711517
chr12|113786799|113787114	2.9814	3.04711	3.85961	4.44345	-0.575688	-0.544238	-0.203223	0.00430307	0.0808547	0	2	0	0	Distal Intergenic	196463	ENSG00000151176	PLBD2	chr12	113786799	113787114
chr12|114203984|114204948	4.13618	5.98474	6.1471	6.28847	-0.60441	-0.0714197	-0.0328032	0.00267438	0.0707214	2	8	3	4	Exon (uc001tvl.3/uc001tvl.3, exon 2 of 4)	9904	ENSG00000122965	RBM19	chr12	114203984	114204948
chr12|114334917|114335367	4.09057	2.18408	3.15457	1.85528	1.14066	0.235389	0.765805	0.000307052	0.0606188	2	6	0	0	Intron (uc009zwi.2/9904, intron 21 of 24)	9904	ENSG00000122965	RBM19	chr12	114334917	114335367
chr12|114348939|114351238	3.78974	4.51291	4.99061	4.90464	-0.372049	-0.12009	0.0250691	0.00354038	0.0762426	6	6	1	2	Intron (uc009zwi.2/9904, intron 21 of 24)	9904	ENSG00000122965	RBM19	chr12	114348939	114351238
chr12|114927140|114927430	6.46305	10.4677	10.0027	10.3271	-0.676151	0.0195017	-0.0460517	0.00184861	0.0648264	0	2	0	1	Distal Intergenic	255480	ENSG00000255399	TBX5-AS1	chr12	114927140	114927430
chr12|115013360|115013639	4.57945	2.68022	4.49465	5.7413	-0.326201	-1.09902	-0.353167	0.00630046	0.0908514	1	2	0	0	Distal Intergenic	6926	ENSG00000135111	TBX3	chr12	115013360	115013639
chr12|115705409|115705759	2.1561	2.55528	4.55406	3.92024	-0.862518	-0.617459	0.216211	4.63415e-05	0.0606188	2	0	1	0	Distal Intergenic	6926	ENSG00000135111	TBX3	chr12	115705409	115705759
chr12|115775517|115776227	5.07855	7.14672	6.6248	8.73423	-0.782264	-0.2894	-0.398804	0.00652135	0.0916467	9	9	1	5	Distal Intergenic	6926	ENSG00000135111	TBX3	chr12	115775517	115776227
chr12|115944896|115945381	2.8239	2.17839	1.91462	1.86472	0.598729	0.224302	0.0380961	0.00285382	0.0719444	0	6	1	0	Distal Intergenic	693205	ENSG00000207967	MIR620	chr12	115944896	115945381
chr12|116098366|116099144	2.44869	3.40283	3.93501	4.69416	-0.938855	-0.464131	-0.254502	0.000509403	0.0606188	11	9	0	4	Distal Intergenic	693205	ENSG00000207967	MIR620	chr12	116098366	116099144
chr1|211611116|211611469	6.21264	3.28147	5.62008	5.52902	0.168181	-0.752683	0.0235654	0.00405565	0.07943	1	1	1	0	Distal Intergenic	343035	ENSG00000198570	RD3	chr1	211611116	211611469
chr12|116380379|116381494	3.16725	3.87065	4.34223	4.47476	-0.498578	-0.209235	-0.043373	0.00193539	0.065482	6	5	1	2	Distal Intergenic	693205	ENSG00000207967	MIR620	chr12	116380379	116381494
chr1|211663791|211664151	2.6226	2.10876	1.6862	2.45028	0.0980512	-0.216553	-0.539173	0.00840274	0.0993068	2	1	1	0	Promoter (2-3kb)	343035	ENSG00000198570	RD3	chr1	211663791	211664151
chr1|211670005|211670288	4.73823	3.07954	2.61265	2.21596	1.09642	0.474784	0.23758	0.0017584	0.0643355	0	2	0	0	Distal Intergenic	343035	ENSG00000198570	RD3	chr1	211670005	211670288
chr12|117020487|117020766	3.73505	4.61673	5.70905	6.83101	-0.870974	-0.565229	-0.25885	0.00390332	0.0784246	1	3	0	0	Distal Intergenic	643246	ENSG00000258102	MAP1LC3B2	chr12	117020487	117020766
chr12|117249474|117249792	6.36019	5.00272	7.80612	5.81483	0.129333	-0.217025	0.42487	0.00752826	0.0959331	1	4	1	0	Intron (uc001twa.4/84900, intron 8 of 11)	84900	ENSG00000135119	RNFT2	chr12	117249474	117249792
chr12|117448336|117449611	3.84134	4.14554	4.87085	5.07775	-0.402579	-0.292628	-0.0600143	0.00165575	0.0637323	8	6	2	0	Intron (uc001twf.1/26259, intron 8 of 10)	54997	ENSG00000088992	TESC	chr12	117448336	117449611
chr12|117523152|117523485	4.76979	5.58886	7.50338	6.61556	-0.471937	-0.243308	0.181679	0.00314988	0.0738057	2	3	1	1	Intron (uc001twh.3/54997, intron 1 of 7)	54997	ENSG00000088992	TESC	chr12	117523152	117523485
chr12|117889584|117889997	5.57237	4.03567	7.55065	7.70291	-0.467114	-0.932596	-0.0288029	0.00625774	0.0907198	3	8	1	2	Downstream (<1kb)	4842	ENSG00000089250	NOS1	chr12	117889584	117889997
chr1|211823122|211823578	4.89298	2.72092	2.90757	2.82386	0.793046	-0.0535732	0.0421472	0.00278804	0.0716515	5	10	2	0	Distal Intergenic	4751	ENSG00000117650	NEK2	chr1	211823122	211823578
chr12|118268046|118268855	3.11653	3.31565	4.2346	4.18101	-0.423911	-0.334559	0.0183749	0.0025712	0.0700681	4	8	0	0	Intron (uc001two.2/283455, intron 3 of 19)	283455	ENSG00000171435	KSR2	chr12	118268046	118268855
chr1|211886176|211886999	5.48163	3.22532	3.59947	3.48839	0.652046	-0.113118	0.0452247	0.0017272	0.0642435	6	11	1	1	Distal Intergenic	4751	ENSG00000117650	NEK2	chr1	211886176	211886999
chr12|119605375|119605734	3.9481	2.09632	2.74623	3.32009	0.249936	-0.663363	-0.27377	0.00355332	0.0763152	1	1	1	0	Distal Intergenic	26353	ENSG00000152137	HSPB8	chr12	119605375	119605734
chr12|119685068|119685358	5.46062	5.4537	8.29181	8.68546	-0.669537	-0.671367	-0.0669156	0.00618158	0.0903854	0	1	0	1	Distal Intergenic	144742	ENSG00000281196	LINC00934	chr12	119685068	119685358
chr12|119835078|119835552	4.4493	2.4907	4.0458	2.70551	0.717677	-0.119348	0.580525	0.00624074	0.0906703	0	7	2	0	Intron (uc001txe.3/160777, intron 1 of 13)	160777	ENSG00000183273	CCDC60	chr12	119835078	119835552
chr12|120322418|120322799	3.39017	2.33043	4.14537	3.17434	0.0948996	-0.445865	0.385043	0.00194251	0.0655113	5	4	1	0	Distal Intergenic	11113	ENSG00000122966	CIT	chr12	120322418	120322799
chr12|120492035|120492406	4.23667	2.22035	3.35973	3.2334	0.389878	-0.542266	0.055294	0.00125198	0.0613509	8	7	1	0	Intron (uc001txk.2/92558, intron 2 of 6)	92558	ENSG00000135127	BICDL1	chr12	120492035	120492406
chr12|120683035|120683372	6.20041	5.45129	8.1714	8.93477	-0.527067	-0.712832	-0.128847	0.00100735	0.0606784	1	1	0	0	Intron (uc001txx.3/5829, intron 1 of 10)	5829	ENSG00000089159	PXN	chr12	120683035	120683372
chr12|120700270|120701175	5.10651	8.49385	9.12091	9.89714	-0.954674	-0.220593	-0.117834	0.00010686	0.0606188	11	10	3	5	Promoter (2-3kb)	5829	ENSG00000089159	PXN	chr12	120700270	120701175
chr12|12178921|12179572	4.22824	2.3762	2.83538	2.46139	0.780584	-0.0508194	0.20407	0.00780221	0.0970698	5	11	1	0	Intron (uc001raa.1/2120, intron 1 of 1)	79370	ENSG00000121380	BCL2L14	chr12	12178921	12179572
chr12|122011785|122012568	5.05121	3.15906	4.4287	3.78591	0.415987	-0.261147	0.226243	0.00742337	0.0954789	2	3	2	0	5' UTR	84678	ENSG00000089094	KDM2B	chr12	122011785	122012568
chr12|122755105|122755470	4.20201	3.30023	5.33799	4.76878	-0.182543	-0.531053	0.162676	0.0078305	0.0971256	7	3	1	0	Downstream (<1kb)	6249	ENSG00000130779	CLIP1	chr12	122755105	122755470
chr12|123376268|123376572	5.38217	6.46852	9.10292	12.8356	-1.25389	-0.988643	-0.495749	6.06717e-05	0.0606188	0	2	0	1	Intron (uc001udl.3/79720, intron 1 of 3)	79720	ENSG00000139722	VPS37B	chr12	123376268	123376572
chr12|123618521|123618895	4.66325	1.82088	2.69753	2.75175	0.760989	-0.595708	-0.028709	0.00585399	0.0888175	2	7	1	0	Intron (uc001uek.1/57605, intron 1 of 25)	57605	ENSG00000090975	PITPNM2	chr12	123618521	123618895
chr12|123626299|123626649	3.56049	2.59842	5.63575	5.68925	-0.676162	-1.1306	-0.0136305	0.000161644	0.0606188	5	5	1	1	Intron (uc001uek.1/57605, intron 1 of 25)	57605	ENSG00000090975	PITPNM2	chr12	123626299	123626649
chr12|123883156|123884744	2.74026	3.22151	3.60551	3.25726	-0.249347	-0.015924	0.146541	0.00625207	0.0907198	2	6	0	2	Intron (uc001uew.3/387893, intron 5 of 7)	387893	ENSG00000183955	KMT5A	chr12	123883156	123884744
chr12|124240551|124241710	2.77446	3.36799	3.68374	3.024	-0.12425	0.15543	0.284716	0.00395887	0.0787331	3	3	0	1	Exon (uc001ufr.3/23545, exon 19 of 20)	196385	ENSG00000197653	DNAH10	chr12	124240551	124241710
chr12|124392026|124394075	3.53102	4.61304	4.89316	4.55997	-0.368938	0.0166935	0.101741	0.00171771	0.0642197	11	6	0	2	Exon (uc001uft.4/196385, exon 57 of 78)	196385	ENSG00000197653	DNAH10	chr12	124392026	124394075
chr12|124423455|124423802	2.77153	2.43317	3.73434	3.54617	-0.355576	-0.543423	0.0745936	0.00580109	0.0885296	2	2	1	0	Intron (uc001ufv.1/80212, intron 2 of 2)	80212	ENSG00000119242	CCDC92	chr12	124423455	124423802
chr1|212469952|212470257	4.95977	1.98843	2.78541	3.25085	0.609455	-0.709185	-0.222927	0.00143988	0.0624307	0	3	0	0	Intron (uc001hjb.3/5525, intron 1 of 12)	5525	ENSG00000066027	PPP2R5A	chr1	212469952	212470257
chr12|124807104|124807420	3.7695	2.58671	2.33572	2.1821	0.788655	0.245398	0.0981456	0.00133528	0.0619395	0	2	1	0	Downstream (1-2kb)	9612	ENSG00000196498	NCOR2	chr12	124807104	124807420
chr12|125188928|125189168	5.49093	2.9735	3.22347	2.74471	1.0004	0.115513	0.231964	0.00244719	0.0692467	0	2	0	0	Distal Intergenic	9612	ENSG00000196498	NCOR2	chr12	125188928	125189168
chr1|212541748|212542300	6.80053	3.05355	4.11207	3.33471	1.02809	-0.127072	0.302304	0.00577744	0.0884122	5	8	1	0	Intron (uc001hjc.4/55248, intron 7 of 7)	692157	ENSG00000201544	SNORA16B	chr1	212541748	212542300
chr12|125440150|125440475	3.96165	1.75016	3.13287	2.95516	0.422867	-0.755744	0.0842501	0.00651249	0.091617	0	4	1	0	Intron (uc001ugy.3/57647, intron 18 of 26)	57647	ENSG00000150990	DHX37	chr12	125440150	125440475
chr12|125629812|125630631	3.93012	3.93469	5.47682	5.20489	-0.405296	-0.403617	0.0734708	0.0046514	0.0828731	5	5	3	1	Distal Intergenic	65985	ENSG00000081760	AACS	chr12	125629812	125630631
chr12|125798424|125799085	6.41273	11.1321	10.9866	10.972	-0.774818	0.0208999	0.00192254	0.000865941	0.0606188	5	7	3	5	Distal Intergenic	114795	ENSG00000139364	TMEM132B	chr12	125798424	125799085
chr1|212590029|212590475	3.85408	2.34193	2.86833	2.53132	0.606496	-0.112194	0.18032	0.00148697	0.0627987	5	8	2	0	Promoter (1-2kb)	55248	ENSG00000065600	TMEM206	chr1	212590029	212590475
chr1|212614846|212615962	3.76068	2.02401	2.34457	2.06833	0.862525	-0.0312539	0.180857	0.00418707	0.0801921	5	7	2	0	Exon (uc001hjd.3/29937, exon 2 of 4)	29937	ENSG00000117691	NENF	chr1	212614846	212615962
chr1|212619097|212620209	3.04582	2.10223	3.02028	2.51804	0.274527	-0.26038	0.262382	0.00216548	0.067135	4	8	2	0	3' UTR	29937	ENSG00000117691	NENF	chr1	212619097	212620209
chr1|212630985|212631368	4.28231	2.8182	2.29479	1.96783	1.12179	0.51817	0.221757	0.00750105	0.0957881	2	5	1	0	Distal Intergenic	29937	ENSG00000117691	NENF	chr1	212630985	212631368
chr12|127584691|127585076	4.74863	8.58471	7.22122	7.66009	-0.689851	0.164408	-0.085119	0.00299002	0.072905	4	4	1	2	Distal Intergenic	440117	ENSG00000249873	LINC02372	chr12	127584691	127585076
chr12|128797635|128797985	3.43543	3.15749	1.86012	2.49878	0.459269	0.337553	-0.425828	0.00079691	0.0606188	0	4	1	1	Intron (uc021rgn.1/92293, intron 1 of 8)	100500817	ENSG00000265635	MIR3612	chr12	128797635	128797985
chr12|128799001|128799263	3.90025	5.43421	2.22728	1.91146	1.02889	1.50739	0.220608	0.00139556	0.0622804	0	2	0	1	Intron (uc021rgn.1/92293, intron 1 of 8)	100500817	ENSG00000265635	MIR3612	chr12	128799001	128799263
chr12|128971278|128971740	3.67541	6.87425	7.51566	8.95476	-1.28475	-0.381453	-0.252756	0.000126865	0.0606188	3	3	0	1	Intron (uc021rgn.1/92293, intron 2 of 8)	100500817	ENSG00000265635	MIR3612	chr12	128971278	128971740
chr12|12902680|12903232	5.33284	5.01198	7.03598	7.02586	-0.39777	-0.487294	0.00207771	0.00250614	0.0697077	7	5	2	0	Intron (uc001rau.4/81575, intron 1 of 1)	693198	ENSG00000207983	MIR613	chr12	12902680	12903232
chr12|129056554|129057080	3.16582	2.37483	1.23802	1.69217	0.903704	0.488948	-0.450842	8.97041e-05	0.0606188	1	10	1	2	Intron (uc021rgn.1/92293, intron 3 of 8)	121260	ENSG00000139370	SLC15A4	chr12	129056554	129057080
chr12|12915933|12916281	4.94314	2.84323	5.58061	4.93607	0.00206381	-0.795835	0.17706	0.00791954	0.097505	5	2	1	0	Promoter (1-2kb)	693198	ENSG00000207983	MIR613	chr12	12915933	12916281
chr12|129493116|129493722	4.61087	7.60929	6.9368	6.18459	-0.423641	0.299082	0.165592	0.000438832	0.0606188	4	5	2	2	Distal Intergenic	121256	ENSG00000151952	TMEM132D	chr12	129493116	129493722
chr12|129741399|129742678	3.35576	4.46429	2.44803	2.58683	0.375454	0.787245	-0.0795633	0.00524707	0.085719	4	8	1	2	Intron (uc009zyl.1/121256, intron 4 of 8)	121256	ENSG00000151952	TMEM132D	chr12	129741399	129742678
chr12|12993918|12994323	4.94367	2.26757	3.96641	3.57636	0.467091	-0.657344	0.149343	0.00746042	0.0956505	9	6	1	0	Distal Intergenic	51202	ENSG00000213782	DDX47	chr12	12993918	12994323
chr1|213013674|213014122	4.64527	2.41398	3.28689	2.44958	0.923227	-0.0211233	0.424188	0.00428547	0.0807912	2	8	2	0	Intron (uc001hjq.3/149643, intron 1 of 2)	149643	ENSG00000185523	SPATA45	chr1	213013674	213014122
chr12|130189226|130189801	2.10194	3.6962	3.24878	3.83393	-0.867106	-0.0527826	-0.238925	0.00613687	0.090095	8	6	0	4	Intron (uc009zyl.1/121256, intron 1 of 8)	121256	ENSG00000151952	TMEM132D	chr12	130189226	130189801
chr1|213059051|213059546	3.13954	1.95153	2.10796	2.262	0.472959	-0.212988	-0.101752	0.00159968	0.063438	1	7	2	0	Intron (uc001hjt.3/28982, intron 5 of 9)	28982	ENSG00000162769	FLVCR1	chr1	213059051	213059546
chr12|130785546|130785882	3.99921	4.09862	7.16382	7.08779	-0.825622	-0.790199	0.0153918	0.000423255	0.0606188	2	3	1	0	Distal Intergenic	9271	ENSG00000125207	PIWIL1	chr12	130785546	130785882
chr1|213080332|213080687	6.75753	2.51673	5.40313	5.3103	0.347703	-1.07724	0.0250005	0.0039679	0.0788455	2	3	1	0	Distal Intergenic	79805	ENSG00000143494	VASH2	chr1	213080332	213080687
chr12|130859464|130860058	5.15379	7.82267	8.23086	8.18564	-0.667461	-0.0654343	0.00794752	0.00546111	0.0867777	3	4	4	2	Distal Intergenic	9271	ENSG00000125207	PIWIL1	chr12	130859464	130860058
chr12|130957937|130958660	2.46434	2.34748	1.6277	1.59669	0.62612	0.556032	0.0277589	0.000408985	0.0606188	0	2	0	0	Intron (uc001uil.2/23504, intron 3 of 18)	23504	ENSG00000060709	RIMBP2	chr12	130957937	130958660
chr12|131275792|131276900	3.86221	2.98213	4.80365	4.27807	-0.147534	-0.520617	0.167172	0.00688582	0.0932904	8	6	2	0	3' UTR	2054	ENSG00000111450	STX2	chr12	131275792	131276900
chr1|213151196|213151532	4.58684	4.06441	3.21694	2.48209	0.885946	0.711493	0.374134	0.00684538	0.0931247	2	3	1	0	Intron (uc001hjw.3/79805, intron 5 of 5)	79805	ENSG00000143494	VASH2	chr1	213151196	213151532
chr12|131937294|131937626	6.23225	7.10024	8.663	8.66345	-0.475188	-0.287073	-7.4034e-05	0.00721465	0.094682	2	2	1	1	Distal Intergenic	6433	ENSG00000061936	SFSWAP	chr12	131937294	131937626
chr12|132256298|132256661	5.02513	5.5588	6.96342	6.74678	-0.425038	-0.279426	0.0455979	0.00606766	0.0897194	1	2	1	0	Intron (uc001uja.2/6433, intron 13 of 17)	4326	ENSG00000198598	MMP17	chr12	132256298	132256661
chr12|13250436|13250755	4.5055	5.01281	7.43071	9.06984	-1.00939	-0.855457	-0.287577	0.000687419	0.0606188	1	2	1	0	Promoter (1-2kb)	83445	ENSG00000111305	GSG1	chr12	13250436	13250755
chr12|132520657|132520929	6.08508	9.1096	9.46158	9.68363	-0.670271	-0.0881607	-0.0334677	0.0076519	0.0963775	0	2	0	1	Intron (uc001ujn.3/57634, intron 30 of 52)	677829	ENSG00000208892	SNORA49	chr12	132520657	132520929
chr1|21329204|21329533	5.60755	2.85343	6.19715	5.15324	0.12189	-0.852782	0.266124	0.00265366	0.0706713	1	4	1	0	5' UTR	8672	ENSG00000075151	EIF4G3	chr1	21329204	21329533
chr12|132948891|132949948	2.35501	4.01869	3.4196	2.71204	-0.203643	0.567348	0.334449	0.00666177	0.0922866	3	3	1	2	Distal Intergenic	50614	ENSG00000182870	GALNT9	chr12	132948891	132949948
chr12|133041427|133043689	5.34834	7.3837	7.43336	6.64886	-0.314014	0.151237	0.160908	0.00845225	0.0995158	10	9	3	5	Distal Intergenic	57666	ENSG00000112787	FBRSL1	chr12	133041427	133043689
chr12|13350072|13350635	5.68367	7.6976	8.96387	10.9495	-0.945966	-0.508379	-0.288667	0.00391044	0.0784335	6	11	0	3	Promoter (<=1kb)	2012	ENSG00000134531	EMP1	chr12	13350072	13350635
chr12|13356129|13357925	1.98216	2.89191	2.94769	3.76401	-0.925198	-0.380248	-0.352686	0.00050799	0.0606188	7	7	0	4	Intron (uc010shr.1/2012, intron 1 of 4)	2012	ENSG00000134531	EMP1	chr12	13356129	13357925
chr12|13475223|13475751	3.53157	2.14653	2.18788	2.86469	0.301928	-0.416376	-0.388845	0.00734981	0.0951771	4	5	2	0	Distal Intergenic	283422	ENSG00000180861	LINC01559	chr12	13475223	13475751
chr1|213613979|213614389	3.87674	2.60585	2.33014	2.28247	0.764248	0.191156	0.0298211	0.00477143	0.0835337	0	6	1	1	Distal Intergenic	26750	ENSG00000136643	RPS6KC1	chr1	213613979	213614389
chr1|213672090|213672698	3.15442	1.74714	1.72219	1.82827	0.786897	-0.0654825	-0.0862319	0.00573042	0.088155	3	8	1	0	Distal Intergenic	100861504	ENSG00000281664	LINC00538	chr1	213672090	213672698
chr1|213771980|213772239	4.92263	1.91505	3.32463	2.96799	0.729943	-0.632103	0.163707	0.00509664	0.0850037	0	2	0	0	Distal Intergenic	100861504	ENSG00000281664	LINC00538	chr1	213771980	213772239
chr1|213861814|213862076	5.78723	2.56017	3.73265	4.5591	0.344123	-0.832509	-0.288551	0.00285904	0.0720039	0	2	0	0	Distal Intergenic	100861504	ENSG00000281664	LINC00538	chr1	213861814	213862076
chr1|214250090|214250385	4.45351	2.61328	2.71839	2.28747	0.96119	0.192108	0.249001	0.00127582	0.0614912	0	2	0	0	Distal Intergenic	5629	ENSG00000117707	PROX1	chr1	214250090	214250385
chr1|214284990|214285796	3.10627	3.0188	2.32567	2.32667	0.416917	0.375706	-0.000621335	0.0055285	0.0872183	2	5	2	0	Distal Intergenic	5629	ENSG00000117707	PROX1	chr1	214284990	214285796
chr1|214310735|214311116	6.79517	3.69039	4.81061	4.97191	0.450709	-0.430029	-0.0475797	0.0065897	0.0919665	6	6	1	0	Distal Intergenic	56950	ENSG00000143499	SMYD2	chr1	214310735	214311116
chr1|214429440|214429792	5.98668	3.01625	5.56663	4.63132	0.370333	-0.618668	0.265382	0.00378072	0.0777744	3	2	1	0	Distal Intergenic	56950	ENSG00000143499	SMYD2	chr1	214429440	214429792
chr1|214658796|214659366	4.93352	2.88983	4.0364	4.17561	0.240631	-0.531002	-0.0489193	0.00603198	0.0896052	4	6	1	0	Intron (uc001hkk.2/5784, intron 1 of 18)	5784	ENSG00000152104	PTPN14	chr1	214658796	214659366
chr1|215399760|215400304	4.51425	2.427	2.807	3.5758	0.336222	-0.559093	-0.349234	0.00316575	0.0738935	6	4	1	0	Intron (uc001hko.3/3776, intron 6 of 6)	3776	ENSG00000082482	KCNK2	chr1	215399760	215400304
chr12|1591349|1591775	4.6308	2.06027	3.25965	2.15768	1.10178	-0.0666531	0.595232	0.00429719	0.0808047	4	8	3	0	Intron (uc001qiz.2/23085, intron 19 of 19)	100292680	#N/A	LINC00942	chr12	1591349	1591775
chr1|21636056|21636379	6.04365	3.37937	4.91408	4.73813	0.351103	-0.487562	0.0526041	0.00347634	0.075904	0	3	1	0	Intron (uc001bem.2/1889, intron 1 of 18)	100506801	ENSG00000231105	LOC100506801	chr1	21636056	21636379
chr12|1716924|1717271	4.24749	1.68045	2.33342	2.43701	0.801497	-0.536265	-0.0626682	0.00231528	0.068399	2	4	1	0	Intron (uc009zdq.3/81029, intron 1 of 4)	81029	ENSG00000111186	WNT5B	chr12	1716924	1717271
chr1|21722235|21722644	4.26239	2.2179	3.28	2.93088	0.540331	-0.402141	0.162363	0.00429524	0.0807912	3	3	2	0	Distal Intergenic	84224	ENSG00000142794	NBPF3	chr1	21722235	21722644
chr12|1744352|1744966	5.36078	2.79347	4.05464	3.52521	0.604734	-0.335651	0.201863	0.00246518	0.0693953	9	8	2	0	Intron (uc009zdq.3/81029, intron 3 of 4)	81029	ENSG00000111186	WNT5B	chr12	1744352	1744966
chr1|218574787|218575476	5.69744	3.93156	4.18696	3.84164	0.568592	0.0333809	0.124182	0.00502761	0.084752	1	5	2	0	Intron (uc001hll.3/7042, intron 2 of 2)	728463	ENSG00000232480	TGFB2-AS1	chr1	218574787	218575476
chr1|218841582|218842052	5.654	2.23331	3.23704	3.30143	0.776179	-0.563906	-0.0284195	0.000992602	0.0606188	1	5	1	0	Distal Intergenic	728463	ENSG00000232480	TGFB2-AS1	chr1	218841582	218842052
chr12|1886711|1887267	3.89431	2.08482	3.14856	3.19958	0.283484	-0.617965	-0.0231914	0.00264155	0.0705373	2	3	1	0	Exon (uc001qjm.3/79602, exon 4 of 8)	93589	ENSG00000151062	CACNA2D4	chr12	1886711	1887267
chr12|1892655|1893249	4.62898	2.19551	4.49105	3.53373	0.389505	-0.686632	0.345864	0.00495048	0.0843174	7	8	1	0	Exon (uc001qjm.3/79602, exon 7 of 8)	93589	ENSG00000151062	CACNA2D4	chr12	1892655	1893249
chr12|19094383|19095149	2.1992	1.80868	1.38821	1.79704	0.291354	0.00931289	-0.372396	0.00704355	0.0938975	2	8	2	0	Distal Intergenic	54477	ENSG00000052126	PLEKHA5	chr12	19094383	19095149
chr12|1920522|1921203	3.51385	2.25314	2.08476	2.16365	0.699582	0.0584696	-0.0535912	0.00552097	0.0871819	4	7	2	0	Promoter (<=1kb)	93589	ENSG00000151062	CACNA2D4	chr12	1920522	1921203
chr1|219555860|219556294	5.50105	2.54304	4.20893	4.26618	0.366764	-0.746391	-0.0194918	0.00737982	0.0953051	4	8	2	0	Distal Intergenic	127018	ENSG00000143353	LYPLAL1	chr1	219555860	219556294
chr1|2198850|2199906	3.6282	4.26371	5.17156	4.53216	-0.320947	-0.0880922	0.190399	0.00390866	0.0784267	9	5	3	0	Intron (uc001aja.4/6497, intron 1 of 6)	6497	ENSG00000157933	SKI	chr1	2198850	2199906
chr1|220252230|220252890	3.94651	2.31053	3.36573	2.80522	0.492464	-0.279886	0.262807	0.00377211	0.0777403	8	7	3	0	Intron (uc021pjd.1/26828, intron 1 of 1)	10380	ENSG00000162813	BPNT1	chr1	220252230	220252890
chr1|22027714|22028077	5.06935	2.95392	5.57329	5.21722	-0.0414811	-0.82065	0.0952475	0.00551095	0.0871585	4	3	1	0	Exon (uc001bfa.3/84196, exon 11 of 15)	84196	ENSG00000090686	USP48	chr1	22027714	22028077
chr1|220374932|220375238	5.56634	1.78738	3.62099	2.89144	0.944941	-0.693939	0.324595	0.00753167	0.0959429	0	2	0	0	Promoter (<=1kb)	677818	ENSG00000222370	SNORA36B	chr1	220374932	220375238
chr1|220423018|220423465	4.46294	2.66318	4.23051	2.70988	0.719764	-0.0250789	0.6426	0.00573562	0.0881672	7	7	2	0	Intron (uc001hmf.2/25782, intron 1 of 34)	6791	#N/A	AURKAPS1	chr1	220423018	220423465
chr1|220521052|220521329	8.51702	2.71008	4.28286	3.92938	1.11605	-0.535967	0.124273	0.00814471	0.0984414	0	2	0	0	Distal Intergenic	25782	ENSG00000118873	RAB3GAP2	chr1	220521052	220521329
chr12|20580859|20581308	3.73684	4.34476	2.26694	2.77947	0.427011	0.644468	-0.294064	0.00422154	0.0804746	1	8	1	2	Intron (uc001reh.2/5139, intron 1 of 15)	5139	ENSG00000172572	PDE3A	chr12	20580859	20581308
chr1|220636183|220636885	4.77559	3.88257	3.12075	2.44165	0.967824	0.669157	0.354037	0.00103942	0.060705	2	9	1	2	Distal Intergenic	4139	ENSG00000116141	MARK1	chr1	220636183	220636885
chr1|22097404|22097792	5.29743	2.78668	4.8021	3.99621	0.406658	-0.520086	0.265031	0.00414154	0.0798678	0	3	1	0	Intron (uc001bfb.3/84196, intron 1 of 26)	84196	ENSG00000090686	USP48	chr1	22097404	22097792
chr1|221077100|221077622	3.51135	1.96409	2.36985	2.16847	0.695348	-0.142817	0.12812	0.00421962	0.0804524	3	10	2	0	Distal Intergenic	3142	ENSG00000136630	HLX	chr1	221077100	221077622
chr1|151008811|151009293	4.63097	1.91839	1.47755	1.56694	1.56337	0.291946	-0.0847444	0.00107647	0.060705	1	11	2	0	Promoter (<=1kb)	149428	ENSG00000163141	BNIPL	chr1	151008811	151009293
chr12|2270279|2270630	4.49279	2.44269	3.14607	2.7016	0.733797	-0.145348	0.219736	0.00113555	0.060903	0	4	1	0	Intron (uc001qjz.2/775, intron 3 of 46)	775	ENSG00000151067	CACNA1C	chr12	2270279	2270630
chr1|223208502|223208972	4.53802	2.57121	2.89105	2.63306	0.785321	-0.0342969	0.13485	0.000367448	0.0606188	0	6	1	0	Distal Intergenic	7100	ENSG00000187554	TLR5	chr1	223208502	223208972
chr1|223251377|223252371	3.03359	2.09948	1.86981	2.02801	0.580959	0.0499637	-0.117177	0.00174153	0.0642481	3	4	2	0	Distal Intergenic	7100	ENSG00000187554	TLR5	chr1	223251377	223252371
chr1|223523078|223523711	2.68357	2.06375	1.33418	1.45402	0.884105	0.505224	-0.124096	0.00141104	0.0622804	1	6	2	0	Intron (uc001hnx.3/55061, intron 1 of 7)	55061	ENSG00000143502	SUSD4	chr1	223523078	223523711
chr1|223879992|223880304	5.89235	3.06394	4.77619	4.14294	0.508188	-0.435266	0.205205	0.00766229	0.0963923	0	3	0	0	Distal Intergenic	824	ENSG00000162909	CAPN2	chr1	223879992	223880304
chr1|223932101|223932605	6.19821	2.7122	4.96833	4.23878	0.548202	-0.644184	0.229112	0.004826	0.0838045	2	7	1	0	Intron (uc010puy.2/824, intron 3 of 20)	824	ENSG00000162909	CAPN2	chr1	223932101	223932605
chr1|223977828|223978433	3.98595	1.97248	2.62085	2.3694	0.750404	-0.264505	0.145516	0.000519644	0.0606188	3	4	1	0	Intron (uc010puz.2/7159, intron 5 of 7)	7159	ENSG00000143514	TP53BP2	chr1	223977828	223978433
chr1|224000176|224000561	5.03709	2.14417	3.23847	3.46092	0.541437	-0.690734	-0.0958414	0.00209039	0.0667431	2	5	1	0	Intron (uc001hod.3/7159, intron 4 of 18)	7159	ENSG00000143514	TP53BP2	chr1	224000176	224000561
chr1|224160198|224160712	3.62938	1.82127	3.05346	2.41085	0.59018	-0.404599	0.340899	0.00223504	0.0676542	3	3	2	0	Distal Intergenic	7159	ENSG00000143514	TP53BP2	chr1	224160198	224160712
chr1|224380610|224380933	4.58485	2.59539	3.79373	2.59121	0.823248	0.00232506	0.54999	0.00430307	0.0808547	0	1	1	0	3' UTR	8560	ENSG00000143753	DEGS1	chr1	224380610	224380933
chr1|224382291|224383411	4.1366	2.15562	2.50013	2.55555	0.694811	-0.245528	-0.0316313	0.00827834	0.0989513	3	8	2	0	Distal Intergenic	8560	ENSG00000143753	DEGS1	chr1	224382291	224383411
chr1|224421051|224421387	5.22787	2.16222	3.55946	3.93744	0.408963	-0.864746	-0.145603	0.0029493	0.0726152	2	2	1	0	Intron (uc001hok.3/4931, intron 20 of 22)	100313769	ENSG00000221406	MIR320B2	chr1	224421051	224421387
chr1|224457658|224458185	4.80681	1.95296	2.8829	2.97887	0.690315	-0.609104	-0.0472458	0.00122744	0.0612161	4	5	2	0	Intron (uc001hok.3/4931, intron 17 of 22)	100313769	ENSG00000221406	MIR320B2	chr1	224457658	224458185
chr1|224496247|224496689	4.56497	2.12948	3.1558	3.06367	0.575342	-0.52476	0.0427423	0.00277786	0.0715474	4	5	2	0	Intron (uc001hok.3/4931, intron 5 of 22)	4931	ENSG00000143748	NVL	chr1	224496247	224496689
chr12|24581780|24582109	3.72154	1.90808	2.87065	3.2948	0.175709	-0.788066	-0.198812	0.00192124	0.0653538	0	4	1	0	Intron (uc001rfx.4/6660, intron 1 of 17)	6660	ENSG00000134532	SOX5	chr12	24581780	24582109
chr1|224597702|224599131	4.64775	2.57646	3.92994	3.08527	0.591136	-0.260008	0.349112	0.00452817	0.0820866	11	10	2	0	Exon (uc001hop.4/80232, exon 7 of 14)	100616468	ENSG00000266618	MIR4742	chr1	224597702	224599131
chr1|224616319|224616822	4.97736	2.15521	2.70129	3.19334	0.640314	-0.567241	-0.241416	0.00786955	0.0973071	4	7	2	0	Intron (uc001hop.4/80232, intron 3 of 13)	80232	ENSG00000162923	WDR26	chr1	224616319	224616822
chr1|224650977|224651271	5.08589	2.18873	3.81047	3.71376	0.453619	-0.762786	0.0370897	0.00775646	0.0968361	0	3	0	0	Distal Intergenic	80232	ENSG00000162923	WDR26	chr1	224650977	224651271
chr1|224662451|224663033	4.90401	2.2453	3.36224	2.88928	0.763249	-0.363803	0.218711	0.000362875	0.0606188	2	4	1	0	Distal Intergenic	80232	ENSG00000162923	WDR26	chr1	224662451	224663033
chr1|224679061|224679402	5.23073	2.34104	3.73373	4.26081	0.295884	-0.863981	-0.190512	0.00505281	0.0848946	2	2	1	0	Distal Intergenic	80232	ENSG00000162923	WDR26	chr1	224679061	224679402
chr1|224714161|224714512	5.6475	2.90549	4.86797	4.12921	0.451746	-0.507083	0.237454	0.00413024	0.0798666	3	1	1	0	Distal Intergenic	149111	ENSG00000143786	CNIH3	chr1	224714161	224714512
chr12|24789324|24789628	5.94903	3.33	7.31253	6.90278	-0.214523	-1.05165	0.083193	0.00220049	0.0673577	1	2	0	0	Distal Intergenic	144360	ENSG00000197503	LINC00477	chr12	24789324	24789628
chr1|224874458|224874761	7.25299	3.16993	3.12356	2.49126	1.5417	0.347578	0.32632	0.00186565	0.064957	0	1	0	1	Intron (uc001hos.1/149111, intron 3 of 5)	149111	ENSG00000143786	CNIH3	chr1	224874458	224874761
chr12|2496370|2496577	4.42326	4.19504	2.52121	2.06815	1.09677	1.02034	0.285772	0.00194965	0.0655559	0	2	0	0	Intron (uc001qjz.2/775, intron 3 of 46)	775	ENSG00000151067	CACNA1C	chr12	2496370	2496577
chr12|25001054|25001417	5.3333	2.1469	6.64046	4.54783	0.229849	-1.08293	0.546103	0.00504822	0.0848946	4	5	1	0	Intron (uc001rgc.3/586, intron 6 of 10)	586	ENSG00000060982	BCAT1	chr12	25001054	25001417
chr1|225009275|225010091	3.57483	2.05317	2.7277	2.52257	0.502978	-0.297046	0.112789	0.00851743	0.0997585	7	8	2	0	Distal Intergenic	127602	ENSG00000185842	DNAH14	chr1	225009275	225010091
chr12|25075336|25075663	4.46285	2.49168	4.57484	3.72621	0.260253	-0.580591	0.29601	0.00556629	0.0873782	1	3	1	0	Intron (uc001rgd.4/586, intron 1 of 10)	586	ENSG00000060982	BCAT1	chr12	25075336	25075663
chr12|25096282|25096775	3.62152	2.24349	2.73341	2.22048	0.705727	0.0148756	0.299834	0.00600195	0.089505	2	6	2	0	Intron (uc001rgd.4/586, intron 1 of 10)	586	ENSG00000060982	BCAT1	chr12	25096282	25096775
chr12|25242944|25243268	4.80263	5.03121	7.07241	6.85683	-0.513716	-0.446636	0.0446592	0.00173435	0.0642481	1	3	1	0	Exon (uc001rgh.3/4033, exon 13 of 21)	4033	ENSG00000118308	LRMP	chr12	25242944	25243268
chr12|25374667|25375009	5.48661	4.35275	7.35916	7.46875	-0.444951	-0.778939	-0.0213252	0.00628049	0.0907839	3	2	1	0	Intron (uc001rgp.1/3845, intron 4 of 5)	144363	ENSG00000205707	ETFRF1	chr12	25374667	25375009
chr12|25631267|25631577	5.47831	3.65215	6.65876	5.00815	0.129453	-0.45553	0.410976	0.00375838	0.0776471	0	2	0	0	Intron (uc001rgs.2/160492, intron 8 of 8)	160492	ENSG00000152936	LMNTD1	chr12	25631267	25631577
chr1|225634679|225635152	4.12913	2.22247	2.67528	2.29436	0.847747	-0.0459275	0.221595	0.00250155	0.0696513	1	7	1	0	Distal Intergenic	3930	ENSG00000143815	LBR	chr1	225634679	225635152
chr12|25636560|25636988	5.40399	2.26815	3.10756	3.37447	0.679362	-0.573146	-0.118882	0.00631476	0.0909172	2	9	2	0	Intron (uc001rgs.2/160492, intron 8 of 8)	160492	ENSG00000152936	LMNTD1	chr12	25636560	25636988
chr1|225651886|225653026	5.22871	3.08274	3.53336	3.58053	0.546282	-0.215961	-0.0191337	0.000265514	0.0606188	2	7	1	1	Distal Intergenic	3930	ENSG00000143815	LBR	chr1	225651886	225653026
chr1|225816463|225816906	5.25214	2.54052	2.89074	2.75112	0.932883	-0.114896	0.0714159	0.00515724	0.0853475	2	6	3	1	Intron (uc001hpc.1/55740, intron 1 of 14)	55740	ENSG00000154380	ENAH	chr1	225816463	225816906
chr1|226032521|226033260	3.00537	1.93628	1.90995	1.64543	0.869075	0.23482	0.215068	0.000464562	0.0606188	1	4	1	0	3' UTR	2052	ENSG00000143819	EPHX1	chr1	226032521	226033260
chr1|226052540|226053598	4.56351	3.09833	3.87503	3.28349	0.474914	-0.0837417	0.238978	0.00562218	0.0876953	2	4	2	0	Exon (uc001hpm.2/9725, exon 10 of 25)	9725	ENSG00000196187	TMEM63A	chr1	226052540	226053598
chr1|226071857|226072519	4.17495	2.27003	2.20331	2.58513	0.691523	-0.187525	-0.230564	0.00727368	0.0948603	1	4	0	0	Promoter (1-2kb)	9725	ENSG00000196187	TMEM63A	chr1	226071857	226072519
chr1|226073348|226073691	6.58169	3.10727	4.07648	3.47522	0.921353	-0.161459	0.230216	0.00117383	0.0610212	2	2	1	0	Promoter (2-3kb)	9725	ENSG00000196187	TMEM63A	chr1	226073348	226073691
chr1|226085283|226086299	2.13627	2.33725	1.48277	1.44249	0.566533	0.696253	0.0397344	0.00766576	0.0963923	5	4	1	0	Intron (uc010pvj.3/10637, intron 5 of 7)	10637	ENSG00000243709	LEFTY1	chr1	226085283	226086299
chr1|226103000|226103403	3.97256	2.09061	2.79467	3.22301	0.301659	-0.624484	-0.205731	0.0050048	0.0846338	5	6	1	0	Intron (uc010pvj.3/10637, intron 5 of 7)	29920	ENSG00000143811	PYCR2	chr1	226103000	226103403
chr1|226160168|226161129	5.15357	3.46753	4.02269	3.29519	0.645209	0.0735451	0.287797	0.001162	0.0610212	6	10	2	0	Distal Intergenic	163859	ENSG00000143751	SDE2	chr1	226160168	226161129
chr12|26226127|26226598	3.4146	2.24818	3.98636	4.14706	-0.280374	-0.883331	-0.0570168	0.00405195	0.0793767	5	7	2	0	Intron (uc001rgz.3/11228, intron 5 of 5)	11228	ENSG00000123094	RASSF8	chr12	26226127	26226598
chr1|226256838|226258400	3.32119	2.38913	2.15628	2.2496	0.56203	0.0868161	-0.0611246	0.0030985	0.0734764	6	6	2	1	Intron (uc001hpw.3/3020, intron 3 of 3)	440926	#N/A	H3F3AP4	chr1	226256838	226258400
chr1|226279782|226280177	2.77165	2.16222	2.16453	1.65795	0.741345	0.383113	0.384649	0.00181832	0.0646663	4	3	1	0	Distal Intergenic	440926	#N/A	H3F3AP4	chr1	226279782	226280177
chr1|226301042|226301597	3.64183	1.96794	2.4322	2.16713	0.748879	-0.1391	0.166475	0.000871151	0.0606188	3	3	0	0	Distal Intergenic	440926	#N/A	H3F3AP4	chr1	226301042	226301597
chr1|226319045|226319559	3.96069	2.66575	3.10597	2.25706	0.81131	0.240096	0.4606	0.00164514	0.0637323	4	5	0	0	Distal Intergenic	64746	ENSG00000182827	ACBD3	chr1	226319045	226319559
chr1|226350292|226350815	5.17095	2.44758	3.95187	3.43343	0.590781	-0.488292	0.202886	0.00086116	0.0606188	5	6	1	0	Intron (uc001hpy.3/64746, intron 3 of 7)	64746	ENSG00000182827	ACBD3	chr1	226350292	226350815
chr12|2635546|2635882	6.11604	3.1945	6.57452	4.62865	0.402006	-0.534999	0.506295	0.00424274	0.0805154	1	1	1	0	Intron (uc001qjz.2/775, intron 9 of 46)	775	ENSG00000151067	CACNA1C	chr12	2635546	2635882
chr1|226371314|226371750	5.47154	2.71137	3.03041	2.55368	1.09937	0.0864445	0.246932	0.00162486	0.063485	4	6	2	0	Promoter (2-3kb)	64746	ENSG00000182827	ACBD3	chr1	226371314	226371750
chr1|226422947|226423244	6.57377	2.75446	5.49849	4.97398	0.402319	-0.852635	0.144634	0.00556123	0.0873703	1	2	0	0	Intron (uc001hqa.3/286826, intron 12 of 14)	83881	ENSG00000185155	MIXL1	chr1	226422947	226423244
chr1|226592252|226593347	5.75283	4.20139	3.55854	3.66374	0.650956	0.197552	-0.0420316	0.0017738	0.064451	4	7	1	1	Promoter (2-3kb)	142	ENSG00000143799	PARP1	chr1	226592252	226593347
chr1|226617871|226619154	4.88973	3.24302	3.39971	3.34852	0.546233	-0.0461855	0.02189	0.00225975	0.067881	3	5	3	0	Distal Intergenic	142	ENSG00000143799	PARP1	chr1	226617871	226619154
chr1|226774669|226775275	3.86654	2.1934	2.53827	2.27099	0.767719	-0.050155	0.16052	0.00705632	0.0939504	3	5	1	0	Intron (uc021pjw.1/375057, intron 1 of 2)	375057	ENSG00000203685	STUM	chr1	226774669	226775275
chr1|226846574|226847569	4.25173	2.67353	2.84883	2.49163	0.770962	0.101657	0.19328	0.000941343	0.0606188	4	5	0	0	Intron (uc010pvo.2/3707, intron 2 of 7)	3707	ENSG00000143772	ITPKB	chr1	226846574	226847569
chr1|226960451|226961951	1.96329	1.82227	1.44175	1.33926	0.551838	0.444303	0.106384	0.00159016	0.0634043	2	8	1	0	Distal Intergenic	3707	ENSG00000143772	ITPKB	chr1	226960451	226961951
chr12|26964175|26965369	4.45165	3.58833	5.75355	5.43821	-0.288792	-0.599821	0.0813197	0.00746718	0.0956584	4	7	2	0	Intron (uc001rhg.3/3709, intron 1 of 56)	3709	ENSG00000123104	ITPR2	chr12	26964175	26965369
chr1|226984437|226985061	4.3931	2.66558	3.35897	3.03316	0.534417	-0.186371	0.147198	0.00182333	0.0647413	1	5	2	0	Distal Intergenic	3707	ENSG00000143772	ITPKB	chr1	226984437	226985061
chr1|227064904|227065569	4.35339	2.23621	2.72777	3.02272	0.526292	-0.43479	-0.148127	0.0048834	0.084051	6	9	2	0	Promoter (1-2kb)	5664	ENSG00000143801	PSEN2	chr1	227064904	227065569
chr12|270988|271373	3.62455	2.14834	3.16936	2.4181	0.583928	-0.17065	0.390318	0.00541664	0.0866355	1	4	1	0	Exon (uc001qhw.2/440073, exon 8 of 14)	574538	ENSG00000249695	LOC574538	chr12	270988	271373
chr1|227433423|227434072	6.77449	2.87667	4.8598	4.48769	0.594138	-0.641573	0.114923	0.00322411	0.0742513	1	6	3	0	Intron (uc001hqr.3/8476, intron 2 of 35)	8476	ENSG00000143776	CDC42BPA	chr1	227433423	227434072
chr1|227468015|227468664	1.95712	1.81399	1.23149	1.30459	0.585141	0.475575	-0.0831833	0.00766576	0.0963923	0	3	0	0	Intron (uc001hqr.3/8476, intron 1 of 35)	8476	ENSG00000143776	CDC42BPA	chr1	227468015	227468664
chr5|6900728|6901059	5.17136	5.56073	3.74936	1.79456	1.52691	1.63164	1.06301	0.00300372	0.0729686	2	4	1	1	Distal Intergenic	100422999	ENSG00000283420	MIR4278	chr5	6900728	6901059
chr1|22755265|22756382	4.82359	5.82037	6.4036	7.48668	-0.634219	-0.363216	-0.225443	0.00523755	0.0856361	9	7	4	4	Distal Intergenic	9923	ENSG00000184677	ZBTB40	chr1	22755265	22756382
chr12|27748133|27748645	5.66486	6.82422	9.57189	9.75159	-0.783598	-0.514973	-0.0268343	0.000932271	0.0606188	8	5	0	3	Intron (uc001rhy.1/8496, intron 2 of 3)	8496	ENSG00000110841	PPFIBP1	chr12	27748133	27748645
chr1|227792316|227792749	5.72552	2.24726	4.00983	3.55787	0.686394	-0.662848	0.172529	0.00187681	0.0651372	5	5	3	0	Intron (uc001hqw.2/339500, intron 1 of 3)	339500	ENSG00000181450	ZNF678	chr1	227792316	227792749
chr1|227798115|227798443	6.68887	3.03676	6.5599	4.61434	0.535637	-0.603594	0.507549	0.00378762	0.0778148	1	2	1	0	Intron (uc001hqw.2/339500, intron 1 of 3)	339500	ENSG00000181450	ZNF678	chr1	227798115	227798443
chr1|227823297|227823836	5.93555	2.85017	5.46145	4.0429	0.553992	-0.504342	0.433896	0.00151317	0.0629089	7	6	3	0	Intron (uc001hqw.2/339500, intron 1 of 3)	401983	#N/A	ZNF847P	chr1	227823297	227823836
chr12|27890065|27890290	4.42077	2.17091	3.52937	2.94139	0.587802	-0.438199	0.262913	0.00628619	0.0907839	0	2	0	0	Intron (uc001rih.3/60488, intron 6 of 7)	60488	ENSG00000061794	MRPS35	chr12	27890065	27890290
chr1|227953544|227954501	4.96266	5.75812	3.37227	3.39303	0.548539	0.763023	-0.00885372	0.000814765	0.0606188	8	10	2	2	Intron (uc001hra.2/116841, intron 2 of 3)	65094	ENSG00000081692	JMJD4	chr1	227953544	227954501
chr12|27985358|27985960	4.01101	2.76135	4.7501	3.70025	0.116342	-0.422252	0.360335	0.00470033	0.0830791	9	5	1	0	Distal Intergenic	57542	ENSG00000087448	KLHL42	chr12	27985358	27985960
chr1|228059899|228060493	4.29883	2.98648	3.2625	2.68293	0.680136	0.154637	0.28217	0.00561197	0.0876659	1	5	1	0	Distal Intergenic	339501	ENSG00000185888	PRSS38	chr1	228059899	228060493
chr1|228106691|228108265	3.67751	2.95061	2.5574	2.57442	0.514484	0.196769	-0.00956693	0.00626911	0.0907557	4	12	1	1	Downstream (<1kb)	100847072	ENSG00000264483	MIR5008	chr1	228106691	228108265
chr1|228281343|228281774	4.23075	3.04467	2.90424	2.66786	0.665229	0.190604	0.122476	0.0028382	0.0717556	2	9	2	0	Intron (uc001hrr.3/375, intron 1 of 4)	100500810	ENSG00000284163	MIR3620	chr1	228281343	228281774
chr1|228368945|228369398	5.1166	2.26398	2.83102	2.22864	1.19902	0.022699	0.345157	6.06717e-05	0.0606188	3	4	2	0	3' UTR	200205	ENSG00000181873	IBA57	chr1	228368945	228369398
chr1|22839189|22839692	3.61424	2.55673	5.36259	4.16376	-0.204194	-0.703584	0.365043	0.000182272	0.0606188	3	2	1	0	Exon (uc001bft.2/9923, exon 13 of 19)	9923	ENSG00000184677	ZBTB40	chr1	22839189	22839692
chr1|228451522|228452401	4.97327	2.89127	3.77949	2.79841	0.829586	0.0470934	0.433584	0.00158141	0.0633488	6	10	1	0	Exon (uc001hsn.4/84033, exon 16 of 81)	84033	ENSG00000154358	OBSCN	chr1	228451522	228452401
chr12|28479704|28480660	2.29268	1.95306	2.9626	2.69612	-0.23385	-0.465146	0.13598	0.000276207	0.0606188	1	1	1	0	Intron (uc001rio.3/55297, intron 8 of 14)	55297	ENSG00000123106	CCDC91	chr12	28479704	28480660
chr1|228906930|228907397	3.82131	1.97695	2.29899	2.4338	0.650859	-0.299933	-0.0822088	0.0038084	0.0778392	2	5	2	0	Distal Intergenic	58480	ENSG00000116574	RHOU	chr1	228906930	228907397
chr1|229004012|229004452	4.40755	2.74872	2.49397	2.10074	1.06908	0.387863	0.247548	0.00204114	0.066319	0	3	1	0	Distal Intergenic	58480	ENSG00000116574	RHOU	chr1	229004012	229004452
chr1|229057278|229058200	4.4008	3.33437	3.01967	3.50061	0.330163	-0.0701882	-0.213213	0.0024833	0.0694567	2	7	1	0	Distal Intergenic	58480	ENSG00000116574	RHOU	chr1	229057278	229058200
chr12|2938549|2938955	5.16042	1.70363	3.07952	2.39811	1.10559	-0.493288	0.360804	0.00456958	0.0823037	5	7	1	0	Intron (uc010sec.2/55846, intron 12 of 12)	83714	ENSG00000053702	NRIP2	chr12	2938549	2938955
chr1|229438451|229438841	5.28552	2.31346	4.17352	3.25719	0.698418	-0.493573	0.357639	0.00243601	0.0691941	10	7	1	0	Promoter (1-2kb)	10638	ENSG00000213029	SPHAR	chr1	229438451	229438841
chr1|229540238|229542010	3.23882	2.71908	2.5613	2.38424	0.44194	0.189589	0.103351	0.00238305	0.068979	7	9	0	0	Distal Intergenic	58	ENSG00000143632	ACTA1	chr1	229540238	229542010
chr12|2954708|2955636	3.25512	3.94168	4.9021	5.11952	-0.653299	-0.377199	-0.0626078	0.00337627	0.0751345	5	4	0	2	Intron (uc021qtc.1/100507424, intron 2 of 3)	100507424	#N/A	#N/A	chr12	2954708	2955636
chr1|229627498|229628151	3.68004	2.29373	2.82021	2.90724	0.340071	-0.341952	-0.0438491	0.00505971	0.0848946	5	4	2	0	Intron (uc001htn.3/55746, intron 8 of 25)	55746	ENSG00000069248	NUP133	chr1	229627498	229628151
chr1|229831246|229831557	4.63484	2.17469	2.96771	2.78253	0.736121	-0.355589	0.0929537	0.00534332	0.0862351	0	3	0	0	Distal Intergenic	9816	ENSG00000135763	URB2	chr1	229831246	229831557
chr1|230283956|230284278	5.21199	2.01307	3.22363	2.31315	1.17198	-0.200462	0.478828	0.000972671	0.0606188	0	4	1	0	Intron (uc010pvy.1/2590, intron 1 of 15)	2590	ENSG00000143641	GALNT2	chr1	230283956	230284278
chr1|230329650|230332043	3.81049	2.19538	2.79492	2.3787	0.679805	-0.115701	0.232633	0.000817779	0.0606188	6	8	3	0	Intron (uc010pvy.1/2590, intron 2 of 15)	2590	ENSG00000143641	GALNT2	chr1	230329650	230332043
chr1|230384270|230385450	3.86701	2.3676	3.07212	3.19029	0.277532	-0.430262	-0.0544524	0.00414154	0.0798678	4	8	4	0	Exon (uc010pvy.1/2590, exon 9 of 16)	2590	ENSG00000143641	GALNT2	chr1	230384270	230385450
chr1|230403944|230405094	3.57474	2.59261	2.07386	1.96176	0.865686	0.402252	0.0801663	0.00643909	0.091333	3	8	2	1	Intron (uc010pvy.1/2590, intron 14 of 15)	2590	ENSG00000143641	GALNT2	chr1	230403944	230405094
chr1|230411980|230412305	5.39504	2.74169	4.87007	3.50567	0.621946	-0.354622	0.474253	0.00150762	0.0629089	0	4	1	0	Intron (uc010pvy.1/2590, intron 15 of 15)	2590	ENSG00000143641	GALNT2	chr1	230411980	230412305
chr1|230829678|230830593	2.93043	1.67648	1.72491	1.81589	0.690437	-0.115244	-0.0741552	0.00732656	0.0950455	2	6	3	0	3' UTR	22796	ENSG00000135775	COG2	chr1	230829678	230830593
chr12|30870960|30871634	6.22025	4.99403	9.16607	9.35339	-0.588516	-0.905283	-0.0291856	0.00220554	0.0674806	12	8	4	0	Intron (uc001rjf.1/65981, intron 10 of 15)	65981	ENSG00000110888	CAPRIN2	chr12	30870960	30871634
chr1|230976175|230976957	4.41287	2.40505	2.75244	2.52336	0.806369	-0.0692809	0.125363	0.000945258	0.0606188	5	7	1	0	Intron (uc009xfh.2/84886, intron 3 of 3)	84886	ENSG00000119280	C1orf198	chr1	230976175	230976957
chr12|30998287|30998609	7.50258	10.4609	11.4158	11.5979	-0.628404	-0.148851	-0.0228268	0.00419853	0.0802845	0	3	1	1	Distal Intergenic	100287314	ENSG00000235884	LINC00941	chr12	30998287	30998609
chr1|231020520|231022237	3.05212	3.46854	2.38812	2.28186	0.419596	0.604115	0.0656604	0.000713303	0.0606188	6	4	2	2	Distal Intergenic	84886	ENSG00000119280	C1orf198	chr1	231020520	231022237
chr1|231362135|231362797	4.46924	2.10186	3.67909	2.9953	0.577329	-0.51103	0.296651	0.000909339	0.0606188	4	7	2	0	3' UTR	8443	ENSG00000116906	GNPAT	chr1	231362135	231362797
chr12|31379378|31379701	5.85822	5.5523	8.18158	8.58578	-0.551488	-0.628864	-0.06957	0.00698636	0.0936779	0	1	1	0	Distal Intergenic	58516	ENSG00000139146	SINHCAF	chr12	31379378	31379701
chr12|31398175|31399577	3.46157	3.13482	4.18634	3.85208	-0.154212	-0.297254	0.120052	0.00181249	0.0646663	9	6	2	1	Distal Intergenic	58516	ENSG00000139146	SINHCAF	chr12	31398175	31399577
chr12|31504039|31506020	1.78132	2.05052	2.11873	2.20638	-0.308738	-0.105689	-0.0584841	0.00614244	0.0901237	4	4	2	0	Distal Intergenic	58516	ENSG00000139146	SINHCAF	chr12	31504039	31506020
chr1|231738659|231739191	4.18725	2.96312	2.34624	2.14128	0.96753	0.468641	0.131877	0.00095138	0.0606188	5	9	1	0	Intron (uc010pwe.2/100303453, intron 5 of 8)	100287814	ENSG00000229228	LINC00582	chr1	231738659	231739191
chr22|43114564|43114949	5.11287	2.16046	2.01508	1.78237	1.52034	0.277546	0.177041	0.00848286	0.0996071	4	6	1	0	Promoter (1-2kb)	53947	ENSG00000128274	A4GALT	chr22	43114564	43114949
chr1|231980339|231981144	5.35079	5.43909	3.52822	3.47241	0.623817	0.64743	0.0230044	0.00327456	0.0746347	7	6	1	1	Intron (uc010pwl.2/100303453, intron 12 of 15)	27184	#N/A	DISC2	chr1	231980339	231981144
chr8|128812711|128813197	3.60494	2.95296	1.5895	1.25778	1.51909	1.23128	0.337689	0.000826888	0.0606188	4	10	0	3	Intron (uc003ysj.3/uc003ysj.3, intron 2 of 2)	100302185	ENSG00000283710	MIR1204	chr8	128812711	128813197
chr1|232373110|232373445	6.31636	2.44989	4.43856	3.89706	0.696708	-0.66967	0.187708	0.00293586	0.0726068	2	4	1	0	Distal Intergenic	57568	ENSG00000116991	SIPA1L2	chr1	232373110	232373445
chr12|32375764|32376175	4.66038	2.09994	4.26959	3.61496	0.366467	-0.783634	0.240118	0.00299275	0.072905	6	9	1	0	Intron (uc001rku.3/636, intron 2 of 9)	636	ENSG00000151746	BICD1	chr12	32375764	32376175
chr1|232405231|232405754	3.23771	1.82249	2.36279	2.37037	0.449861	-0.3792	-0.0046259	0.00305074	0.0732292	2	5	2	0	Distal Intergenic	57568	ENSG00000116991	SIPA1L2	chr1	232405231	232405754
chr1|232449822|232450585	3.63761	2.28756	3.08322	2.18495	0.735389	0.0662081	0.496834	0.00089767	0.0606188	2	2	2	0	Distal Intergenic	57568	ENSG00000116991	SIPA1L2	chr1	232449822	232450585
chr1|232487908|232488239	5.73802	2.27216	3.86287	2.51996	1.18715	-0.149336	0.616268	0.00740659	0.0953269	2	4	1	0	Distal Intergenic	57568	ENSG00000116991	SIPA1L2	chr1	232487908	232488239
chr1|232565890|232566306	6.07054	3.30346	4.51794	3.70591	0.711999	-0.165847	0.285837	0.00189324	0.0651679	5	8	1	0	Intron (uc001hvf.3/57568, intron 8 of 13)	57568	ENSG00000116991	SIPA1L2	chr1	232565890	232566306
chr12|32651895|32652673	4.35097	2.11991	3.15631	3.12511	0.477431	-0.5599	0.0143301	0.00783404	0.0971256	3	7	3	0	Promoter (2-3kb)	121512	ENSG00000139132	FGD4	chr12	32651895	32652673
chr1|232661796|232662532	4.34101	2.56441	2.83593	2.69534	0.687565	-0.0718381	0.073357	0.00600467	0.0895293	1	5	1	0	Distal Intergenic	57568	ENSG00000116991	SIPA1L2	chr1	232661796	232662532
chr1|232679553|232680231	3.05946	2.09518	1.48212	1.7244	0.827178	0.280975	-0.218438	0.00415666	0.0799895	2	6	2	2	Distal Intergenic	57568	ENSG00000116991	SIPA1L2	chr1	232679553	232680231
chr1|232687495|232687966	4.64111	2.37543	3.40353	3.38424	0.45564	-0.510645	0.00819959	0.000743925	0.0606188	5	5	1	0	Distal Intergenic	57568	ENSG00000116991	SIPA1L2	chr1	232687495	232687966
chr1|232738960|232739336	5.17077	2.92944	3.67629	2.79317	0.888478	0.0687238	0.396349	0.0048701	0.0839901	6	5	1	0	Distal Intergenic	57568	ENSG00000116991	SIPA1L2	chr1	232738960	232739336
chr1|232760569|232761597	4.14075	2.45649	2.86627	2.72247	0.604978	-0.148315	0.0742585	0.00739989	0.0953269	4	9	2	0	Distal Intergenic	57568	ENSG00000116991	SIPA1L2	chr1	232760569	232761597
chr12|32834814|32835161	5.70633	2.50438	3.45891	3.98438	0.518207	-0.669906	-0.204038	0.00756925	0.0959913	1	5	1	0	Promoter (2-3kb)	10059	ENSG00000087470	DNM1L	chr12	32834814	32835161
chr12|32840008|32840538	2.59871	1.59946	1.31184	1.98259	0.390411	-0.309806	-0.59579	0.00770749	0.0965715	2	8	2	0	Intron (uc010skf.1/10059, intron 1 of 8)	10059	ENSG00000087470	DNM1L	chr12	32840008	32840538
chr1|232914651|232915166	2.51204	1.91941	1.51966	1.77871	0.498025	0.109828	-0.227083	0.00708193	0.0940715	2	5	2	0	Distal Intergenic	54627	ENSG00000212916	MAP10	chr1	232914651	232915166
chr1|232926002|232926540	5.11879	2.73035	4.09541	3.14731	0.701686	-0.205032	0.37989	0.00393548	0.0785836	4	9	1	0	Distal Intergenic	54627	ENSG00000212916	MAP10	chr1	232926002	232926540
chr12|32948974|32949629	3.63084	3.22812	4.63421	4.38036	-0.270746	-0.440358	0.0812718	0.00447082	0.0818652	2	4	1	0	Exon (uc001rlj.4/5318, exon 12 of 14)	51067	ENSG00000139131	YARS2	chr12	32948974	32949629
chr1|233264203|233264928	3.3264	2.25593	1.75638	1.99943	0.734376	0.174137	-0.186982	0.00240498	0.0689963	5	10	2	0	Intron (uc001hvm.2/80003, intron 8 of 19)	80003	ENSG00000135749	PCNX2	chr1	233264203	233264928
chr1|233280802|233281397	4.37926	2.50181	3.23988	3.42425	0.354898	-0.452814	-0.0798494	0.00269649	0.0709332	4	5	2	0	Intron (uc001hvm.2/80003, intron 6 of 19)	80003	ENSG00000135749	PCNX2	chr1	233280802	233281397
chr12|3381801|3383051	4.7242	2.88075	3.25077	3.21215	0.556528	-0.157096	0.0172401	0.00509664	0.0850037	6	11	2	0	Intron (uc001qlp.3/10867, intron 3 of 8)	56341	ENSG00000111218	PRMT8	chr12	3381801	3383051
chr1|234560661|234561014	5.81473	2.94641	5.23348	4.09987	0.504133	-0.47662	0.352193	0.00442627	0.0815244	3	0	1	0	Intron (uc001hwd.3/6894, intron 20 of 29)	388753	ENSG00000168275	COA6	chr1	234560661	234561014
chr1|234605594|234605939	5.59376	2.4001	4.70679	4.0429	0.468427	-0.752295	0.219351	0.00278422	0.0716434	2	1	1	0	Intron (uc001hwd.3/6894, intron 3 of 29)	6894	ENSG00000059588	TARBP1	chr1	234605594	234605939
chr1|234647257|234647780	2.12027	1.61905	1.3555	2.0291	0.0634078	-0.325692	-0.582016	0.000453716	0.0606188	2	1	2	0	Distal Intergenic	100506795	ENSG00000231768	LINC01354	chr1	234647257	234647780
chr1|234751668|234752295	5.70393	2.37428	3.3549	3.43714	0.730746	-0.53372	-0.0349384	0.0038679	0.0782768	9	10	1	0	Distal Intergenic	359948	ENSG00000168264	IRF2BP2	chr1	234751668	234752295
chr1|234831370|234832662	2.05657	2.20842	1.51352	1.85962	0.145238	0.24801	-0.297097	0.00384679	0.0781206	4	3	1	1	Distal Intergenic	100506810	ENSG00000227630	LINC01132	chr1	234831370	234832662
chr1|234962092|234962514	5.29889	2.43367	3.72608	3.77206	0.490338	-0.63222	-0.0176917	0.000616375	0.0606188	6	6	2	0	Distal Intergenic	100506810	ENSG00000227630	LINC01132	chr1	234962092	234962514
chr1|235006306|235007977	3.93598	1.99728	2.38127	2.46199	0.676898	-0.30179	-0.0480916	0.000938309	0.0606188	4	8	2	0	Distal Intergenic	100506810	ENSG00000227630	LINC01132	chr1	235006306	235007977
chr1|235041605|235041913	5.20989	2.15067	4.11976	4.0952	0.347319	-0.929149	0.00862659	0.00549096	0.0870192	0	3	0	0	Distal Intergenic	100506810	ENSG00000227630	LINC01132	chr1	235041605	235041913
chr1|235127145|235127520	5.57589	2.92355	4.25985	4.34066	0.361289	-0.570192	-0.0271107	0.00599106	0.0894979	4	2	1	0	Distal Intergenic	677802	ENSG00000207181	SNORA14B	chr1	235127145	235127520
chr1|235135702|235136065	7.63746	3.6072	5.40401	4.91089	0.637108	-0.445107	0.138045	0.00264518	0.0705373	2	2	1	0	Distal Intergenic	677802	ENSG00000207181	SNORA14B	chr1	235135702	235136065
chr1|235149078|235149608	3.03082	2.23236	1.75077	1.80208	0.750044	0.308909	-0.0416714	0.000453716	0.0606188	4	6	2	0	Distal Intergenic	677802	ENSG00000207181	SNORA14B	chr1	235149078	235149608
chr1|235167817|235168373	4.15727	2.38249	2.90846	3.02511	0.458652	-0.344518	-0.0567326	0.00420619	0.0803463	5	1	2	0	Distal Intergenic	677802	ENSG00000207181	SNORA14B	chr1	235167817	235168373
chr1|235379130|235379434	4.34692	2.11136	3.59693	3.28909	0.402305	-0.639515	0.129077	0.00609802	0.0899203	0	2	0	0	Intron (uc021pks.1/51742, intron 16 of 23)	51742	ENSG00000054267	ARID4B	chr1	235379130	235379434
chr1|235411023|235411806	4.04358	2.1567	2.7183	2.98851	0.436208	-0.4706	-0.13672	0.00732656	0.0950455	5	6	2	0	Intron (uc021pks.1/51742, intron 6 of 23)	51742	ENSG00000054267	ARID4B	chr1	235411023	235411806
chr1|235588712|235591497	4.33084	2.14508	2.79143	2.58587	0.744	-0.269619	0.110357	0.00165575	0.0637323	7	9	2	0	Exon (uc010pxq.1/6905, exon 6 of 13)	6905	ENSG00000116957	TBCE	chr1	235588712	235591497
chr1|235732193|235732683	3.44543	2.46865	2.16841	2.12749	0.695535	0.214572	0.0274887	0.00191245	0.0653225	4	5	1	1	Intron (uc001hxe.4/2786, intron 3 of 3)	148789	ENSG00000162885	B3GALNT2	chr1	235732193	235732683
chr1|235764716|235765210	3.60227	2.75281	2.0478	2.67441	0.429684	0.0416836	-0.385146	0.00296011	0.0726895	3	5	3	1	Intron (uc001hxe.4/2786, intron 1 of 3)	2786	ENSG00000168243	GNG4	chr1	235764716	235765210
chr1|235827939|235828256	8.83452	1.99234	5.24032	3.90961	1.17613	-0.972563	0.42263	0.00079912	0.0606188	0	3	1	0	Intron (uc001hxi.3/1130, intron 19 of 21)	2786	ENSG00000168243	GNG4	chr1	235827939	235828256
chr1|235849068|235849592	4.92855	2.57471	3.30701	3.39086	0.539512	-0.397243	-0.0361233	0.00142867	0.062351	3	2	2	0	Intron (uc001hxi.3/1130, intron 17 of 21)	2786	ENSG00000168243	GNG4	chr1	235849068	235849592
chr1|236044215|236044774	3.79496	2.395	2.35412	2.31523	0.71293	0.0488706	0.0240325	0.000703485	0.0606188	6	10	1	0	Promoter (2-3kb)	1130	ENSG00000143669	LYST	chr1	236044215	236044774
chr1|236178666|236179085	2.96721	2.34382	1.73981	1.92015	0.627889	0.28764	-0.142288	0.00517132	0.0853475	1	2	1	1	Intron (uc001hxo.3/4811, intron 10 of 19)	4811	ENSG00000116962	NID1	chr1	236178666	236179085
chr1|236211046|236213711	2.8493	2.46199	2.18188	2.05143	0.473977	0.263196	0.0889413	0.00110358	0.0608256	5	4	2	1	Exon (uc001hxo.3/4811, exon 2 of 20)	4811	ENSG00000116962	NID1	chr1	236211046	236213711
chr1|236267480|236268124	6.22807	3.24397	5.08555	4.26137	0.547468	-0.393556	0.255085	0.00128407	0.0615193	7	7	1	0	Distal Intergenic	7107	ENSG00000077585	GPR137B	chr1	236267480	236268124
chr1|236269350|236269880	4.44819	3.20909	3.05408	2.83945	0.647606	0.176552	0.105126	0.00732988	0.095081	1	6	1	0	Distal Intergenic	7107	ENSG00000077585	GPR137B	chr1	236269350	236269880
chr1|236294572|236294901	5.58153	1.91006	3.33519	3.34661	0.737958	-0.809081	-0.00493332	0.00713021	0.0942568	1	4	1	0	Distal Intergenic	7107	ENSG00000077585	GPR137B	chr1	236294572	236294901
chr1|236330005|236333999	3.83056	2.99607	2.91351	2.96012	0.371899	0.0174154	-0.0229001	0.00205617	0.06649	11	9	3	3	Exon (uc001hxq.3/7107, exon 2 of 7)	7107	ENSG00000077585	GPR137B	chr1	236330005	236333999
chr1|236569622|236570563	3.68799	2.15475	2.36944	2.25284	0.711089	-0.0642209	0.0727996	0.00197123	0.0658479	2	6	1	0	Intron (uc001hxu.1/128178, intron 1 of 5)	128178	ENSG00000186197	EDARADD	chr1	236569622	236570563
chr1|236679304|236680226	3.54396	2.75815	2.05623	2.00456	0.822073	0.460415	0.0367155	0.000424433	0.0606188	3	8	1	1	Promoter (1-2kb)	3964	ENSG00000116977	LGALS8	chr1	236679304	236680226
chr1|236813949|236814400	2.69494	2.02188	1.36572	1.41199	0.932521	0.517963	-0.0480634	0.00213689	0.0670694	4	4	2	1	Distal Intergenic	88	ENSG00000077522	ACTN2	chr1	236813949	236814400
chr1|236831241|236832060	2.74355	2.67183	1.31813	1.65655	0.727858	0.689641	-0.329689	0.000231177	0.0606188	0	7	2	2	Distal Intergenic	88	ENSG00000077522	ACTN2	chr1	236831241	236832060
chr1|236857561|236858390	3.73002	3.51612	2.21927	2.72488	0.452992	0.367794	-0.296105	0.00332731	0.0747782	4	7	1	3	Intron (uc001hyf.2/88, intron 1 of 20)	88	ENSG00000077522	ACTN2	chr1	236857561	236858390
chr1|236890832|236892728	3.97039	3.7062	2.72428	2.57788	0.623094	0.523753	0.0796896	0.00852898	0.0997758	7	10	2	2	Promoter (1-2kb)	88	ENSG00000077522	ACTN2	chr1	236890832	236892728
chr1|236982888|236983286	5.87139	2.07577	3.77345	3.59373	0.708218	-0.791834	0.0704	0.00262829	0.0704664	3	5	1	0	Intron (uc001hyi.4/4548, intron 8 of 32)	4548	ENSG00000116984	MTR	chr1	236982888	236983286
chr1|23703926|23704781	4.97474	6.25249	6.35402	6.39437	-0.362181	-0.0323709	-0.00913109	0.00841414	0.0993858	10	10	2	3	Downstream (2-3kb)	80818	ENSG00000125945	ZNF436	chr1	23703926	23704781
chr1|237059439|237059936	3.80609	1.95459	2.41898	2.31187	0.719249	-0.242193	0.0653379	0.00702443	0.0938034	1	7	2	0	Intron (uc001hyi.4/4548, intron 31 of 32)	4548	ENSG00000116984	MTR	chr1	237059439	237059936
chr1|237131490|237131982	3.48513	2.53639	1.80637	1.91295	0.865413	0.406978	-0.0827043	0.000811762	0.0606188	5	6	2	3	Distal Intergenic	645745	ENSG00000244020	MT1HL1	chr1	237131490	237131982
chr1|237161069|237161518	4.78918	3.41775	2.64833	2.45421	0.964521	0.477791	0.109827	0.00439815	0.0813642	5	10	2	2	Distal Intergenic	645745	ENSG00000244020	MT1HL1	chr1	237161069	237161518
chr12|3724078|3724431	5.50185	4.23572	7.5396	5.86492	-0.0921943	-0.469504	0.362375	0.00142933	0.0623713	2	2	1	0	3' UTR	56341	ENSG00000111218	PRMT8	chr12	3724078	3724431
chr1|237276797|237277235	3.17858	2.00665	1.7092	1.82359	0.801597	0.138006	-0.0934637	0.00548597	0.0870035	2	8	2	0	Intron (uc001hyl.1/6262, intron 1 of 104)	6262	ENSG00000198626	RYR2	chr1	237276797	237277235
chr12|3742699|3743189	4.56966	1.93477	4.28804	2.80517	0.704002	-0.535923	0.612233	0.00625491	0.0907198	2	2	0	0	Exon (uc001qmi.1/84766, exon 9 of 15)	84766	ENSG00000130038	CRACR2A	chr12	3742699	3743189
chr12|3775822|3776248	4.82972	2.14902	4.01998	3.03757	0.669021	-0.499241	0.40427	0.00504593	0.0848944	5	6	2	0	Intron (uc001qmi.1/84766, intron 1 of 14)	84766	ENSG00000130038	CRACR2A	chr12	3775822	3776248
chr12|37908242|37908522	5.58728	6.02768	7.93013	8.40183	-0.588559	-0.479102	-0.0833591	0.00440617	0.0814157	1	3	0	0	Distal Intergenic	144245	ENSG00000175548	ALG10B	chr12	37908242	37908522
chr12|3816938|3817685	3.37771	2.06246	3.19703	2.83155	0.254451	-0.457227	0.175139	0.00841794	0.0993934	3	6	2	0	Intron (uc010sen.1/84766, intron 3 of 19)	84766	ENSG00000130038	CRACR2A	chr12	3816938	3817685
chr12|38469679|38470350	3.29632	2.22769	3.69895	3.66602	-0.15336	-0.718668	0.012899	0.00834974	0.0992421	4	4	2	0	Distal Intergenic	144245	ENSG00000175548	ALG10B	chr12	38469679	38470350
chr1|238518383|238519088	4.12027	2.93444	2.44374	2.43272	0.760167	0.270514	0.00651995	0.00319626	0.0740797	2	6	2	1	Distal Intergenic	339535	ENSG00000215808	LINC01139	chr1	238518383	238519088
chr1|23862464|23862932	4.23206	2.08089	3.17387	2.9434	0.523876	-0.500285	0.108757	0.00825592	0.0988243	2	6	2	0	Distal Intergenic	1870	ENSG00000007968	E2F2	chr1	23862464	23862932
chr1|238788744|238789230	3.7879	2.32941	1.73829	1.93355	0.970147	0.268714	-0.15358	0.00252225	0.0698111	3	8	1	1	Distal Intergenic	339535	ENSG00000215808	LINC01139	chr1	238788744	238789230
chr12|39789363|39789910	3.44309	3.37441	5.07426	5.17314	-0.587336	-0.616407	-0.0278427	0.0017984	0.0645693	6	6	1	2	Intron (uc001rlx.3/55605, intron 1 of 36)	55605	ENSG00000139116	KIF21A	chr12	39789363	39789910
chr1|239978369|239978608	5.45918	2.81543	2.37212	2.71973	1.00522	0.0498937	-0.197289	0.000387933	0.0606188	0	2	0	0	Intron (uc001hyo.1/1131, intron 6 of 8)	1131	ENSG00000133019	CHRM3	chr1	239978369	239978608
chr12|40131974|40132273	6.73181	7.07666	10.2671	12.2358	-0.862048	-0.789973	-0.253081	0.00528536	0.0859278	1	2	0	1	Intron (uc009zjv.1/283461, intron 13 of 18)	283461	ENSG00000180116	C12orf40	chr12	40131974	40132273
chr1|240309858|240310356	3.17778	2.4265	1.24269	1.37961	1.20376	0.814615	-0.150794	0.0041246	0.0797811	1	8	1	2	Intron (uc010pyd.2/56776, intron 2 of 17)	56776	ENSG00000155816	FMN2	chr1	240309858	240310356
chr1|240314831|240315367	2.29479	2.46603	1.24532	1.44627	0.666025	0.769856	-0.215819	0.00603472	0.0896052	1	6	1	1	Intron (uc010pyd.2/56776, intron 2 of 17)	56776	ENSG00000155816	FMN2	chr1	240314831	240315367
chr1|24032228|24033775	3.53267	2.44659	2.96495	2.80476	0.332882	-0.197104	0.0801291	0.00840654	0.0993068	5	8	2	0	Distal Intergenic	6135	ENSG00000142676	RPL11	chr1	24032228	24033775
chr1|24055145|24055638	2.91836	3.29786	1.63402	1.87492	0.638334	0.814705	-0.198403	0.00290648	0.0723237	11	12	0	4	Distal Intergenic	6924	ENSG00000011007	ELOA	chr1	24055145	24055638
chr12|40801393|40802058	5.66307	4.16331	6.94694	6.75856	-0.255132	-0.698985	0.0396625	0.00436822	0.081192	8	6	2	0	Exon (uc021qwm.1/uc021qwm.1, exon 5 of 13)	120892	ENSG00000188906	LRRK2	chr12	40801393	40802058
chr1|240816804|240817949	3.63502	3.14483	1.71133	1.79471	1.01821	0.809233	-0.0686322	0.00020744	0.0606188	3	6	2	3	Distal Intergenic	64388	ENSG00000180875	GREM2	chr1	240816804	240817949
chr12|4082483|4082799	5.42748	5.3661	8.65742	6.91094	-0.348599	-0.365008	0.325055	0.00499798	0.0846338	0	3	1	1	Distal Intergenic	57097	ENSG00000111224	PARP11	chr12	4082483	4082799
chr1|240860369|240861254	2.47073	2.49649	1.72512	1.65455	0.578498	0.593461	0.0602551	0.00852898	0.0997758	2	5	1	1	Distal Intergenic	64388	ENSG00000180875	GREM2	chr1	240860369	240861254
chr1|240877664|240878579	5.76518	4.84403	2.84909	2.93934	0.971875	0.720717	-0.0449905	0.000290818	0.0606188	0	8	2	2	Distal Intergenic	6000	ENSG00000182901	RGS7	chr1	240877664	240878579
chr1|241152183|241152463	2.79395	1.68835	1.36875	1.324	1.0774	0.350711	0.0479595	0.00296824	0.0727415	0	2	0	0	Intron (uc010pyh.2/6000, intron 3 of 17)	6000	ENSG00000182901	RGS7	chr1	241152183	241152463
chr1|241267289|241267570	5.99787	3.39436	2.9384	2.97317	1.01245	0.191136	-0.0169719	0.00255711	0.0700343	0	2	0	0	Intron (uc010pyh.2/6000, intron 1 of 17)	100422856	ENSG00000265831	MIR3123	chr1	241267289	241267570
chr1|241286770|241286977	3.65455	1.92527	1.75746	1.73269	1.07668	0.15205	0.0204825	0.00572782	0.088155	0	2	0	0	Intron (uc010pyh.2/6000, intron 1 of 17)	100422856	ENSG00000265831	MIR3123	chr1	241286770	241286977
chr1|241325310|241325815	3.63456	2.27542	1.64981	1.55643	1.22354	0.547886	0.0840582	0.00038293	0.0606188	2	7	1	2	Intron (uc010pyj.1/6000, intron 1 of 17)	6000	ENSG00000182901	RGS7	chr1	241325310	241325815
chr20|54306716|54307088	2.74003	1.84768	1.08166	0.969058	1.49953	0.931061	0.158595	0.000750135	0.0606188	1	1	0	0	Distal Intergenic	140689	ENSG00000054803	CBLN4	chr20	54306716	54307088
chr1|242037171|242037627	4.70329	2.45762	2.81511	3.47868	0.435133	-0.501274	-0.305347	0.00580109	0.0885296	1	5	2	0	Intron (uc001hzh.3/9156, intron 12 of 15)	9156	ENSG00000174371	EXO1	chr1	242037171	242037627
chr1|242116642|242117440	2.94538	2.64214	1.86394	1.40711	1.06572	0.908966	0.405614	0.00100272	0.0606784	2	5	1	1	Distal Intergenic	440738	ENSG00000197769	MAP1LC3C	chr1	242116642	242117440
chr1|242222514|242223092	2.51439	1.85005	1.39177	1.71973	0.548027	0.105383	-0.305264	0.00737314	0.0953051	1	6	2	1	Distal Intergenic	440738	ENSG00000197769	MAP1LC3C	chr1	242222514	242223092
chr1|242484900|242485457	3.47606	2.55899	1.22103	1.58929	1.12907	0.687195	-0.380281	0.000282696	0.0606188	2	6	1	2	Intron (uc001hzl.4/200150, intron 2 of 9)	200150	ENSG00000180287	PLD5	chr1	242484900	242485457
chr12|42493402|42493974	5.06445	2.33166	4.05388	3.6701	0.464584	-0.654465	0.143483	0.00210771	0.066884	8	3	1	0	Intron (uc001rms.4/283464, intron 5 of 7)	283464	ENSG00000151233	GXYLT1	chr12	42493402	42493974
chr12|42864102|42864432	5.23177	3.24683	5.39004	5.46888	-0.063945	-0.752211	-0.0209482	0.00546111	0.0867777	2	2	1	0	Exon (uc010skv.2/144165, exon 3 of 8)	144165	ENSG00000139174	PRICKLE1	chr12	42864102	42864432
chr1|243051302|243051689	3.98455	2.6094	2.03648	1.76691	1.17318	0.562486	0.204842	0.00372595	0.0773833	0	4	0	1	Distal Intergenic	731275	ENSG00000214837	LINC01347	chr1	243051302	243051689
chr1|243259684|243260139	2.53802	1.93167	1.28341	1.22298	1.0533	0.659441	0.0695772	0.00466199	0.0829058	0	6	0	1	Intron (uc001hzq.2/731275, intron 2 of 17)	731275	ENSG00000214837	LINC01347	chr1	243259684	243260139
chr1|243341485|243342114	4.14373	2.41272	3.15817	2.92252	0.503716	-0.276556	0.111876	0.00289985	0.0722631	9	7	1	0	Intron (uc021plo.1/9859, intron 10 of 19)	9859	ENSG00000143702	CEP170	chr1	243341485	243342114
chr1|243421866|243422567	4.50964	2.27467	3.41138	3.2048	0.492775	-0.49458	0.0901185	0.00323148	0.0742902	9	8	1	0	Promoter (2-3kb)	10806	ENSG00000054282	SDCCAG8	chr1	243421866	243422567
chr1|243432842|243433148	4.22462	2.14152	2.16604	2.08535	1.01853	0.0383437	0.0547646	0.000652742	0.0606188	0	3	0	0	Intron (uc001hzw.3/10806, intron 1 of 17)	10806	ENSG00000054282	SDCCAG8	chr1	243432842	243433148
chr1|243459591|243459939	6.77212	1.79724	3.44505	3.58373	0.918148	-0.995679	-0.0569366	0.00601831	0.0895769	2	5	1	0	Intron (uc001hzw.3/10806, intron 6 of 17)	10806	ENSG00000054282	SDCCAG8	chr1	243459591	243459939
chr1|243524047|243524499	6.35473	2.7598	5.3475	4.09762	0.633043	-0.570223	0.384077	0.00400058	0.079091	6	9	4	0	Intron (uc001hzw.3/10806, intron 12 of 17)	100616343	ENSG00000265201	MIR4677	chr1	243524047	243524499
chr1|243655056|243656403	3.35707	2.42801	2.72505	2.2478	0.578688	0.111259	0.277771	0.00392115	0.0784605	4	6	1	0	Intron (uc001hzw.3/10806, intron 17 of 17)	100616343	ENSG00000265201	MIR4677	chr1	243655056	243656403
chr1|243775628|243776267	3.44849	1.87347	1.93255	1.9765	0.803019	-0.0772343	-0.0324416	0.00213689	0.0670694	2	5	2	0	Intron (uc001hzz.1/10000, intron 7 of 13)	10000	ENSG00000117020	AKT3	chr1	243775628	243776267
chr1|243968003|243968392	5.94661	2.82105	3.26861	2.8832	1.04439	-0.0314389	0.181004	0.0039051	0.0784246	5	6	1	1	Intron (uc001hzz.1/10000, intron 1 of 13)	10000	ENSG00000117020	AKT3	chr1	243968003	243968392
chr1|243970547|243971117	6.53083	5.18189	2.97599	3.13705	1.05786	0.724073	-0.0760393	0.000519404	0.0606188	1	5	2	2	Intron (uc001hzz.1/10000, intron 1 of 13)	10000	ENSG00000117020	AKT3	chr1	243970547	243971117
chr1|244476568|244477453	3.18454	2.09296	2.46513	2.56945	0.309622	-0.295916	-0.0597986	0.00425629	0.0805734	1	5	2	0	Distal Intergenic	200159	ENSG00000173728	C1orf100	chr1	244476568	244477453
chr1|244483056|244483803	4.03445	2.4354	1.89907	2.59854	0.634671	-0.0935387	-0.452409	0.00321235	0.0741764	4	8	2	0	Distal Intergenic	200159	ENSG00000173728	C1orf100	chr1	244483056	244483803
chr1|244511837|244512298	4.42563	2.32147	2.75576	2.79271	0.664215	-0.26663	-0.0192178	0.00118088	0.0610486	2	5	2	0	Distal Intergenic	200159	ENSG00000173728	C1orf100	chr1	244511837	244512298
chr1|244544539|244544833	6.10482	2.16894	4.44385	4.04311	0.594483	-0.898475	0.136343	0.00117925	0.0610486	0	3	0	0	Intron (uc001iah.4/200159, intron 4 of 4)	200159	ENSG00000173728	C1orf100	chr1	244544539	244544833
chr1|244557058|244557339	6.0724	2.76757	4.73479	4.30421	0.496516	-0.637131	0.137551	0.00257709	0.070135	0	3	0	0	Distal Intergenic	200159	ENSG00000173728	C1orf100	chr1	244557058	244557339
chr1|244861063|244861349	5.07857	2.14429	3.87106	3.10446	0.710078	-0.533844	0.318385	0.00704036	0.093878	0	2	0	0	Intron (uc001iao.3/51029, intron 4 of 4)	51029	ENSG00000121644	DESI2	chr1	244861063	244861349
chr1|244918142|244919685	3.4722	2.33261	2.64261	2.68741	0.369634	-0.204269	-0.0242554	0.000439646	0.0606188	4	5	2	0	Distal Intergenic	116228	ENSG00000203667	COX20	chr1	244918142	244919685
chr1|244922249|244922789	2.98035	1.9236	1.69836	1.66211	0.842468	0.210797	0.0311274	0.000431573	0.0606188	4	9	0	0	Distal Intergenic	116228	ENSG00000203667	COX20	chr1	244922249	244922789
chr1|245131517|245131914	5.68919	2.90761	3.85213	4.55872	0.319592	-0.648796	-0.242973	0.000791411	0.0606188	4	3	1	0	Promoter (1-2kb)	84288	ENSG00000203666	EFCAB2	chr1	245131517	245131914
chr12|45192832|45193177	4.35015	6.43281	6.42046	7.01725	-0.68984	-0.125457	-0.128231	0.00293586	0.0726068	2	3	1	1	Intron (uc001rof.3/4753, intron 3 of 19)	4753	ENSG00000184613	NELL2	chr12	45192832	45193177
chr1|245230131|245230874	2.27713	2.13489	1.40715	1.44779	0.65337	0.560314	-0.0410677	0.00026675	0.0606188	1	2	1	0	Intron (uc001ibc.2/84288, intron 4 of 7)	55083	ENSG00000162849	KIF26B	chr1	245230131	245230874
chr12|45392662|45392938	5.59042	8.14054	8.81028	7.9177	-0.502125	0.0400429	0.154108	0.00382581	0.0779609	1	1	0	1	Distal Intergenic	440097	ENSG00000185610	DBX2	chr12	45392662	45392938
chr1|245930147|245930841	5.38917	3.14463	5.05841	4.58394	0.233474	-0.543696	0.142096	0.00849821	0.0996441	4	7	1	0	Intron (uc001ibj.3/64754, intron 5 of 6)	55083	ENSG00000162849	KIF26B	chr1	245930147	245930841
chr12|46177524|46177866	5.31003	2.15932	5.07099	4.43985	0.258209	-1.03993	0.191757	0.00375666	0.0776313	3	5	1	0	Intron (uc001ror.3/196528, intron 3 of 19)	196528	ENSG00000189079	ARID2	chr12	46177524	46177866
chr1|246181432|246182001	5.37497	2.1326	3.26075	2.72848	0.978157	-0.355486	0.257106	0.00197666	0.0658745	7	6	1	0	Intron (uc001ibk.3/64754, intron 5 of 11)	64754	ENSG00000185420	SMYD3	chr1	246181432	246182001
chr12|46200127|46200576	6.51344	2.90751	5.26862	5.15833	0.336515	-0.827121	0.0305213	0.00522328	0.0855913	2	5	1	0	Intron (uc001ror.3/196528, intron 3 of 19)	196528	ENSG00000189079	ARID2	chr12	46200127	46200576
chr1|246744201|246744862	4.69943	2.62158	2.91795	2.97183	0.661132	-0.180916	-0.026398	0.000517963	0.0606188	8	9	2	0	Intron (uc001ibo.4/163882, intron 1 of 8)	163882	ENSG00000162852	CNST	chr1	246744201	246744862
chr1|246748111|246748537	4.60876	1.96869	3.3796	3.85501	0.257645	-0.969495	-0.18988	0.00730008	0.0949922	10	7	3	0	Intron (uc001ibo.4/163882, intron 1 of 8)	163882	ENSG00000162852	CNST	chr1	246748111	246748537
chr1|246924536|246924882	3.69208	1.87041	2.7467	3.01298	0.293245	-0.687834	-0.133494	0.0020188	0.066212	1	2	1	0	Intron (uc001ibr.3/51097, intron 9 of 11)	149134	#N/A	LINC01341	chr1	246924536	246924882
chr1|247038138|247038645	3.10807	1.897	2.12111	2.01639	0.624243	-0.0880546	0.0730448	0.00405195	0.0793767	5	5	2	0	Promoter (1-2kb)	25909	ENSG00000153207	AHCTF1	chr1	247038138	247038645
chr1|247071423|247072125	2.36617	2.14024	1.67328	1.8536	0.352223	0.207446	-0.147653	0.0065718	0.091803	5	6	2	0	Intron (uc001ibv.2/25909, intron 4 of 35)	25909	ENSG00000153207	AHCTF1	chr1	247071423	247072125
chr12|47492033|47492359	4.45047	2.22061	4.37591	3.89841	0.191072	-0.811929	0.166698	0.00812265	0.0983238	1	4	1	0	Intron (uc001rpn.3/91523, intron 1 of 3)	347902	ENSG00000139211	AMIGO2	chr12	47492033	47492359
chr1|247516616|247517269	4.07161	2.79321	2.91088	2.60552	0.644029	0.100353	0.159886	0.00190369	0.0652836	2	9	2	1	Distal Intergenic	84838	ENSG00000162714	ZNF496	chr1	247516616	247517269
chr12|47559531|47560081	4.02608	3.11532	4.70859	5.5917	-0.47391	-0.843905	-0.247993	0.00859086	0.0999915	3	4	2	0	Intron (uc001rpn.3/91523, intron 2 of 3)	100616486	ENSG00000263838	MIR4698	chr12	47559531	47560081
chr12|48090621|48090973	5.07362	2.26793	5.05863	5.24727	-0.0485527	-1.21019	-0.0528218	0.00857535	0.0999426	3	5	1	0	Intron (uc001rpr.3/79657, intron 4 of 16)	79657	ENSG00000005175	RPAP3	chr12	48090621	48090973
chr12|48161546|48162057	2.25526	2.4346	1.46538	1.70734	0.40154	0.511931	-0.220476	0.00695793	0.0935923	4	8	1	1	Promoter (2-3kb)	10411	ENSG00000079337	RAPGEF3	chr12	48161546	48162057
chr1|248207426|248208031	4.60725	3.59354	3.0044	2.19646	1.06872	0.710224	0.451897	0.00618158	0.0903854	4	8	1	3	Intron (uc001ids.3/284521, intron 1 of 2)	26246	ENSG00000203663	OR2L2	chr1	248207426	248208031
chr12|4828341|4829221	3.19954	2.75809	1.95874	2.23807	0.515608	0.301414	-0.192329	0.000178079	0.0606188	4	10	1	3	Promoter (<=1kb)	26290	ENSG00000130035	GALNT8	chr12	4828341	4829221
chr1|24841313|24841707	4.54492	2.33313	3.28754	2.71959	0.740867	-0.221118	0.27362	0.00306472	0.0732439	5	6	1	0	Promoter (<=1kb)	11123	ENSG00000117602	RCAN3	chr1	24841313	24841707
chr12|4849126|4849684	4.58792	2.46883	3.68486	3.74009	0.294767	-0.599248	-0.0214608	0.00219847	0.0673577	3	7	2	0	Intron (uc001qne.1/26290, intron 3 of 10)	26290	ENSG00000130035	GALNT8	chr12	4849126	4849684
chr1|248553193|248553703	4.40381	4.21214	2.12515	1.99515	1.14225	1.07805	0.0910649	0.00262349	0.0704416	6	7	0	3	Promoter (2-3kb)	254879	ENSG00000198104	OR2T6	chr1	248553193	248553703
chr1|248581958|248582399	5.23738	2.047	2.31322	2.28259	1.19817	-0.157157	0.0192297	0.00310134	0.0735223	5	8	2	0	Distal Intergenic	26696	ENSG00000175143	OR2T1	chr1	248581958	248582399
chr1|248783734|248784231	1.9989	2.13015	1.08663	1.56228	0.355558	0.447302	-0.523791	0.00842936	0.0993934	1	3	2	2	Distal Intergenic	127077	ENSG00000279301	OR2T11	chr1	248783734	248784231
chr1|249143664|249143977	6.24613	4.84216	4.83294	4.34281	0.524334	0.157023	0.154272	0.00810431	0.0982073	0	2	0	0	3' UTR	55657	ENSG00000171163	ZNF692	chr1	249143664	249143977
chr12|49223909|49224527	4.13676	2.14608	4.59207	2.84222	0.541482	-0.405315	0.692123	0.002952	0.0726378	8	7	1	0	3' UTR	784	ENSG00000167535	CACNB3	chr12	49223909	49224527
chr1|24978577|24978983	4.80138	2.0249	3.24038	3.22746	0.573049	-0.672547	0.00576448	0.00432665	0.0809301	5	7	1	0	Exon (uc001bjm.3/10250, exon 7 of 17)	10250	ENSG00000133226	SRRM1	chr1	24978577	24978983
chr12|5056635|5057181	3.41967	2.11907	1.93174	2.32572	0.556179	-0.134249	-0.267777	0.0064216	0.0912948	2	3	1	1	Distal Intergenic	3736	ENSG00000111262	KCNA1	chr12	5056635	5057181
chr12|515175|515603	4.1311	1.88741	3.1688	2.26254	0.86858	-0.261534	0.485994	0.00278167	0.0716174	4	4	2	0	Intron (uc009zdk.3/84318, intron 2 of 11)	84318	ENSG00000120647	CCDC77	chr12	515175	515603
chr12|51866496|51866793	5.55118	3.11483	6.80036	5.47225	0.0206601	-0.812978	0.313478	0.00710442	0.0941406	0	2	0	0	Intron (uc010sni.3/9498, intron 14 of 14)	9498	ENSG00000050438	SLC4A8	chr12	51866496	51866793
chr12|52166033|52166826	2.22146	3.1688	2.64581	2.72561	-0.295069	0.217359	-0.0428722	0.00323148	0.0742902	6	3	2	1	Promoter (1-2kb)	6334	ENSG00000196876	SCN8A	chr12	52166033	52166826
chr1|25264942|25265281	4.46674	2.4866	4.66855	3.21722	0.473407	-0.371642	0.537157	0.00327605	0.074648	1	3	1	0	Intron (uc009vrj.3/864, intron 2 of 6)	864	ENSG00000020633	RUNX3	chr1	25264942	25265281
chr12|52754654|52755024	4.14055	2.9	4.7711	3.18256	0.379637	-0.134136	0.584136	0.00854441	0.0998241	4	2	1	0	Exon (uc001sag.3/3891, exon 9 of 9)	3891	ENSG00000135443	KRT85	chr12	52754654	52755024
chr12|53420545|53422265	3.25338	2.90281	3.99788	3.14447	0.0491226	-0.115366	0.346418	0.00720159	0.0946606	12	9	3	0	Exon (uc009zmp.1/1975, exon 9 of 9)	23371	ENSG00000111077	TNS2	chr12	53420545	53422265
chr12|53670093|53670888	4.45032	3.26895	5.56031	3.85602	0.206799	-0.238283	0.528054	0.00512452	0.0852555	4	3	3	0	Promoter (2-3kb)	9700	ENSG00000135476	ESPL1	chr12	53670093	53670888
chr12|53780567|53780828	3.58942	1.90381	1.59245	1.9242	0.899492	-0.0153656	-0.273006	0.00230787	0.0683464	0	2	0	0	Intron (uc001scw.3/6667, intron 3 of 5)	6667	ENSG00000185591	SP1	chr12	53780567	53780828
chr12|54109002|54109396	4.48371	4.77436	6.97107	5.51175	-0.297816	-0.207204	0.338871	0.0023121	0.068399	2	5	1	0	Promoter (<=1kb)	57658	ENSG00000012822	CALCOCO1	chr12	54109002	54109396
chr1|25438983|25439372	5.39315	2.07348	3.47659	3.40028	0.665475	-0.713594	0.032022	0.00424854	0.0805154	8	9	1	0	Distal Intergenic	25949	ENSG00000117614	SYF2	chr1	25438983	25439372
chr12|54472065|54474266	2.84576	3.5214	3.92714	4.29537	-0.593968	-0.286635	-0.129303	0.00382581	0.0779609	15	13	1	3	Promoter (1-2kb)	100240735	ENSG00000250654	LOC100240735	chr12	54472065	54474266
chr12|55799295|55799564	5.08002	3.09158	6.6584	4.87132	0.0605209	-0.65597	0.450863	0.00818162	0.0985848	1	1	0	0	Distal Intergenic	403282	ENSG00000205328	OR6C65	chr12	55799295	55799564
chr12|5623648|5623976	3.24339	1.65516	1.64922	1.68268	0.946743	-0.0237844	-0.0289712	0.000484558	0.0606188	0	1	1	0	Distal Intergenic	4908	ENSG00000185652	NTF3	chr12	5623648	5623976
chr12|56274645|56275450	3.48016	2.27912	2.75497	2.34713	0.568258	-0.0424175	0.231141	0.00184522	0.0647979	3	6	1	0	Distal Intergenic	4327	ENSG00000123342	MMP19	chr12	56274645	56275450
chr12|56379826|56380301	4.06671	2.25675	3.74263	2.77107	0.553418	-0.296195	0.433607	0.00845989	0.0995556	3	3	1	0	Intron (uc001siv.3/5869, intron 1 of 5)	6821	ENSG00000139531	SUOX	chr12	56379826	56380301
chr12|56625668|56626044	4.64771	2.78261	4.64275	3.64692	0.349844	-0.390239	0.348302	0.00400788	0.0790965	6	3	1	0	Promoter (1-2kb)	283375	ENSG00000139540	SLC39A5	chr12	56625668	56626044
chr12|56782183|56782598	4.48872	1.92273	2.74615	2.26114	0.989252	-0.233898	0.280357	0.00330913	0.0747346	1	6	1	0	Distal Intergenic	319	ENSG00000175336	APOF	chr12	56782183	56782598
chr12|5736481|5736833	4.16895	2.27864	2.76659	3.29731	0.338394	-0.533115	-0.253179	0.00438216	0.08128	1	3	1	0	Intron (uc001qnm.2/57101, intron 17 of 25)	4908	ENSG00000185652	NTF3	chr12	5736481	5736833
chr12|57561620|57561949	5.49059	5.19164	7.59469	6.41082	-0.223547	-0.304319	0.244482	0.00618999	0.0904357	2	2	1	0	Promoter (<=1kb)	4035	ENSG00000123384	LRP1	chr12	57561620	57561949
chr12|58226497|58227118	4.54179	6.30291	7.42823	9.02888	-0.991288	-0.518529	-0.281529	4.52273e-05	0.0606188	6	2	2	0	Intron (uc009zqf.3/10106, intron 1 of 7)	407016	ENSG00000207789	MIR26A2	chr12	58226497	58227118
chr12|60316088|60316417	5.93725	6.09315	9.22614	8.51449	-0.520125	-0.482732	0.115807	0.00181332	0.0646663	1	1	1	1	Distal Intergenic	9194	ENSG00000118596	SLC16A7	chr12	60316088	60316417
chr12|61130832|61131140	5.85303	6.59344	8.60818	9.51341	-0.700779	-0.528931	-0.144254	0.00521617	0.0855913	0	3	0	0	Distal Intergenic	9194	ENSG00000118596	SLC16A7	chr12	61130832	61131140
chr12|6169543|6170429	2.47937	2.4079	1.52141	1.58118	0.648968	0.606774	-0.0555924	0.00388203	0.0783396	0	3	1	1	Intron (uc001qnn.1/7450, intron 13 of 51)	7450	ENSG00000110799	VWF	chr12	6169543	6170429
chr1|26213461|26213905	3.98013	1.86925	2.97124	2.38599	0.738223	-0.352128	0.316475	0.00447082	0.0818652	4	5	2	0	Intron (uc001bky.3/3925, intron 1 of 1)	3925	ENSG00000117632	STMN1	chr1	26213461	26213905
chr12|63109073|63109478	4.45486	5.06221	7.41609	9.1463	-1.03781	-0.853422	-0.302529	0.00586729	0.0888289	5	7	1	4	Intron (uc001srk.3/57460, intron 6 of 9)	406891	ENSG00000199179	MIRLET7I	chr12	63109073	63109478
chr12|6350643|6352689	2.97658	2.20162	2.22997	2.22063	0.42269	-0.0124	0.00606075	0.00855987	0.099869	4	6	1	0	Distal Intergenic	928	ENSG00000010278	CD9	chr12	6350643	6352689
chr12|63567373|63567730	4.23887	2.80144	5.22271	4.67547	-0.141433	-0.738943	0.159685	0.00383629	0.0779945	4	2	1	0	Distal Intergenic	552	ENSG00000166148	AVPR1A	chr12	63567373	63567730
chr12|6357888|6358289	5.86505	3.13087	4.24754	3.59283	0.707024	-0.198553	0.241507	0.00596664	0.089325	6	4	1	0	Distal Intergenic	928	ENSG00000010278	CD9	chr12	6357888	6358289
chr12|64480697|64481374	5.79625	4.25691	7.90069	8.2909	-0.51641	-0.961723	-0.0695509	0.000723257	0.0606188	8	7	1	0	Exon (uc010ssp.1/57522, exon 11 of 22)	57522	ENSG00000196935	SRGAP1	chr12	64480697	64481374
chr12|65115575|65115899	5.33174	2.09414	4.65594	3.81105	0.484416	-0.863829	0.288881	0.00558147	0.0874193	0	4	1	0	Intron (uc001ssf.3/2799, intron 10 of 12)	2799	ENSG00000135677	GNS	chr12	65115575	65115899
chr12|65429254|65430184	3.2647	4.65187	4.1475	4.31976	-0.404001	0.106861	-0.0587072	0.00691395	0.0934545	1	2	1	2	Distal Intergenic	11197	ENSG00000156076	WIF1	chr12	65429254	65430184
chr12|66025013|66026227	5.03275	7.66936	7.51785	8.13319	-0.692474	-0.0847147	-0.113501	0.0011046	0.0608256	7	11	2	4	Distal Intergenic	8091	ENSG00000149948	HMGA2	chr12	66025013	66026227
chr12|6789736|6790102	4.88496	2.25493	3.35734	2.92501	0.739906	-0.375358	0.198877	0.00313552	0.0737072	2	4	1	0	Promoter (2-3kb)	171017	ENSG00000126746	ZNF384	chr12	6789736	6790102
chr12|68035134|68035511	4.03116	3.44661	5.6026	4.64435	-0.204281	-0.430299	0.270619	0.00416235	0.0800223	3	2	1	0	Distal Intergenic	8445	ENSG00000127334	DYRK2	chr12	68035134	68035511
chr1|27031069|27031791	3.06402	1.7312	1.54703	1.67524	0.871063	0.0474105	-0.114862	0.00197123	0.0658479	0	2	2	0	Intron (uc001bmt.1/8289, intron 1 of 18)	8289	ENSG00000117713	ARID1A	chr1	27031069	27031791
chr12|70579284|70579611	5.9804	4.76465	7.46205	7.54305	-0.334907	-0.662777	-0.0155776	0.00273375	0.0711969	1	3	1	1	Distal Intergenic	4848	ENSG00000111596	CNOT2	chr12	70579284	70579611
chr12|74691074|74691394	5.17544	5.17174	8.80744	8.22864	-0.668971	-0.670004	0.0980689	7.55048e-05	0.0606188	0	1	1	0	Distal Intergenic	100507377	ENSG00000251138	LOC100507377	chr12	74691074	74691394
chr12|75853316|75853690	6.88128	9.21487	10.878	10.879	-0.660797	-0.239511	-0.000138314	0.00591542	0.0890353	4	2	1	2	Distal Intergenic	11010	ENSG00000139278	GLIPR1	chr12	75853316	75853690
chr12|76242237|76242663	2.67507	2.89246	6.46834	6.4754	-1.27539	-1.16267	-0.00157283	7.88572e-05	0.0606188	4	3	1	2	Distal Intergenic	22822	ENSG00000139289	PHLDA1	chr12	76242237	76242663
chr12|76247817|76248961	3.55889	4.01587	4.79697	5.86986	-0.721898	-0.547614	-0.291201	0.0038084	0.0778392	10	5	2	3	Distal Intergenic	22822	ENSG00000139289	PHLDA1	chr12	76247817	76248961
chr12|76522418|76522731	4.03508	3.3865	4.83983	6.88306	-0.770454	-1.02325	-0.508093	0.00112618	0.0609019	0	4	0	0	Distal Intergenic	4673	ENSG00000187109	NAP1L1	chr12	76522418	76522731
chr12|77096438|77097284	2.4846	1.91384	1.57387	1.82336	0.446411	0.069867	-0.212287	0.00690143	0.093378	5	6	2	1	Distal Intergenic	23390	ENSG00000186908	ZDHHC17	chr12	77096438	77097284
chr12|77853222|77853816	4.1599	2.05977	1.9463	1.99104	1.06303	0.048962	-0.032783	0.00780574	0.0970915	1	6	2	1	Distal Intergenic	89795	ENSG00000067798	NAV3	chr12	77853222	77853816
chr12|793180|793552	6.23979	2.81319	5.59084	3.82055	0.707719	-0.441569	0.549287	0.00721138	0.094682	8	6	1	0	Distal Intergenic	4815	ENSG00000171840	NINJ2	chr12	793180	793552
chr12|80485430|80485809	5.41203	4.74758	7.95187	6.968	-0.364576	-0.553552	0.190549	0.00733652	0.0951083	7	5	0	0	Distal Intergenic	283310	ENSG00000165899	OTOGL	chr12	80485430	80485809
chr12|81036173|81036624	4.54173	3.05345	5.56937	5.96535	-0.393364	-0.966165	-0.0990921	0.00605666	0.0896825	3	6	1	0	Intron (uc001sze.2/374462, intron 32 of 41)	4618	ENSG00000111046	MYF6	chr12	81036173	81036624
chr12|83488737|83489114	6.4104	4.29434	7.96825	8.70114	-0.44079	-1.01877	-0.126941	0.00796264	0.0976126	5	8	1	0	Intron (uc001szt.3/160335, intron 11 of 11)	160335	ENSG00000179104	TMTC2	chr12	83488737	83489114
chr12|84554234|84554601	4.51468	4.08619	6.36322	6.99413	-0.631521	-0.77539	-0.136388	0.00590469	0.0889394	2	3	1	0	Distal Intergenic	55117	ENSG00000072041	SLC6A15	chr12	84554234	84554601
chr12|84750153|84751294	3.64096	4.46133	4.87262	5.21973	-0.519654	-0.226502	-0.099278	0.00384154	0.0780478	2	5	3	2	Distal Intergenic	55117	ENSG00000072041	SLC6A15	chr12	84750153	84751294
chr12|8476256|8476907	3.82985	2.33291	3.29317	2.85874	0.421909	-0.293246	0.204098	0.00846372	0.0995739	4	4	1	0	Distal Intergenic	389634	ENSG00000226091	LINC00937	chr12	8476256	8476907
chr12|85711753|85712138	6.07574	9.15671	9.10761	10.2626	-0.756267	-0.164498	-0.172255	0.00599106	0.0894979	4	5	1	2	Distal Intergenic	8092	ENSG00000180318	ALX1	chr12	85711753	85712138
chr12|86230123|86230625	3.69762	5.98615	6.06634	7.70358	-1.05893	-0.3639	-0.344703	0.00266949	0.0707141	10	7	0	5	Promoter (<=1kb)	9182	ENSG00000198774	RASSF9	chr12	86230123	86230625
chr12|86313522|86313968	3.65094	3.4372	5.7452	6.26246	-0.778461	-0.865498	-0.124375	0.00772844	0.0967042	12	8	2	1	Distal Intergenic	4922	ENSG00000133636	NTS	chr12	86313522	86313968
chr12|86994417|86995967	4.24491	4.42327	5.50568	5.2697	-0.311986	-0.252608	0.0631996	0.00755898	0.0959913	4	4	1	1	Intron (uc001taj.4/25834, intron 2 of 8)	100616215	ENSG00000264402	MIR548AL	chr12	86994417	86995967
chr1|28760261|28760878	3.61483	2.27172	2.54895	2.35343	0.619161	-0.0509849	0.115136	0.00328504	0.0746573	4	7	1	0	Intron (uc001bpu.3/65979, intron 2 of 5)	65979	ENSG00000204138	PHACTR4	chr1	28760261	28760878
chr12|8823741|8824434	2.71115	2.08772	1.56607	2.04672	0.405594	0.0286161	-0.386159	0.00354684	0.0762612	5	7	2	1	Distal Intergenic	8076	ENSG00000197614	MFAP5	chr12	8823741	8824434
chr12|88601808|88602090	5.50716	6.74575	8.00496	9.15361	-0.733032	-0.440363	-0.193447	0.00625774	0.0907198	1	2	0	1	Distal Intergenic	160418	ENSG00000139324	TMTC3	chr12	88601808	88602090
chr12|89431699|89432073	4.43786	2.36645	5.16646	4.50276	-0.0209441	-0.928085	0.198367	0.00507583	0.0849683	7	5	1	0	Distal Intergenic	728084	ENSG00000246363	LINC02458	chr12	89431699	89432073
chr12|89627354|89627877	3.53873	3.25718	4.82955	4.08689	-0.207772	-0.327379	0.240886	0.00661964	0.092105	0	3	1	0	Distal Intergenic	1848	ENSG00000139318	DUSP6	chr12	89627354	89627877
chr12|90279946|90280235	4.62286	3.90485	6.90962	5.90488	-0.353123	-0.596639	0.2267	0.00582484	0.0886787	1	2	0	0	Distal Intergenic	338758	ENSG00000271614	ATP2B1-AS1	chr12	90279946	90280235
chr12|91347677|91349266	4.00662	5.20981	5.96878	5.58294	-0.478641	-0.0997945	0.0964121	0.00489675	0.0841521	7	6	2	2	Promoter (<=1kb)	196477	ENSG00000197651	CCER1	chr12	91347677	91349266
chr12|9212435|9212915	4.13954	1.92991	3.19225	2.49937	0.727905	-0.373035	0.35301	0.00422539	0.0804746	1	5	1	0	Intron (uc009zgh.2/253128, intron 1 of 2)	253128	ENSG00000214851	LINC00612	chr12	9212435	9212915
chr12|93307198|93307481	4.64682	2.37497	4.44295	3.25598	0.513151	-0.455183	0.448427	0.00545367	0.0867777	1	3	0	0	Intron (uc001tck.3/8411, intron 1 of 28)	8411	ENSG00000102189	EEA1	chr12	93307198	93307481
chr12|93545413|93545714	6.21477	3.0156	6.69864	5.81018	0.0971179	-0.946138	0.205285	0.00839136	0.0993068	1	2	0	0	Intron (uc021rbu.1/643339, intron 3 of 4)	8411	ENSG00000102189	EEA1	chr12	93545413	93545714
chr12|93585719|93586087	5.98511	5.67905	9.67909	10.8459	-0.857704	-0.933431	-0.16421	0.00101668	0.0606784	3	5	0	1	Intron (uc021rbu.1/643339, intron 3 of 4)	643339	#N/A	LOC643339	chr12	93585719	93586087
chr12|93624781|93625161	4.48303	2.20819	4.88379	3.74804	0.258336	-0.763273	0.381865	0.00258772	0.0702553	3	7	1	0	Intron (uc021rbu.1/643339, intron 2 of 4)	643339	#N/A	LOC643339	chr12	93624781	93625161
chr12|94134705|94134940	3.83126	5.4222	6.86778	8.75987	-1.19309	-0.692032	-0.351066	0.00170827	0.0642042	1	2	0	0	Intron (uc001tda.3/8738, intron 2 of 2)	8738	ENSG00000169372	CRADD	chr12	94134705	94134940
chr12|94219512|94220403	3.09546	4.07413	5.04027	5.58392	-0.851125	-0.454787	-0.147779	0.0065184	0.091617	9	8	0	5	Intron (uc001tda.3/8738, intron 2 of 2)	8738	ENSG00000169372	CRADD	chr12	94219512	94220403
chr12|9440893|9441516	3.40476	3.81847	4.95324	4.75485	-0.481845	-0.316404	0.058975	0.00499117	0.0845915	1	2	1	0	Exon (uc010sgp.1/642846, exon 2 of 22)	642846	#N/A	LOC642846	chr12	9440893	9441516
chr12|94580446|94581302	4.35134	5.40066	7.55038	7.74301	-0.831436	-0.519758	-0.0363453	0.00020173	0.0606188	6	7	0	2	Intron (uc001tdc.3/10154, intron 4 of 30)	10154	ENSG00000136040	PLXNC1	chr12	94580446	94581302
chr12|94605770|94606658	2.25091	2.97017	3.14134	3.17485	-0.496181	-0.0961445	-0.0153095	0.000822701	0.0606188	4	3	2	0	Intron (uc001tdc.3/10154, intron 5 of 30)	10154	ENSG00000136040	PLXNC1	chr12	94605770	94606658
chr12|94660185|94661335	4.29401	5.30661	5.66643	7.85871	-0.871966	-0.566502	-0.471854	0.00377383	0.0777403	6	7	3	2	Intron (uc001tdc.3/10154, intron 21 of 30)	10154	ENSG00000136040	PLXNC1	chr12	94660185	94661335
chr12|95038191|95040308	2.42548	2.87929	2.98103	3.29911	-0.443808	-0.196362	-0.146265	0.000605078	0.0606188	3	5	4	3	Intron (uc001tdj.2/57458, intron 1 of 3)	57458	ENSG00000057704	TMCC3	chr12	95038191	95040308
chr12|95356253|95356611	3.98239	3.82033	5.65821	5.05573	-0.344286	-0.40422	0.162427	0.00740659	0.0953269	3	1	1	0	Distal Intergenic	55967	ENSG00000184752	NDUFA12	chr12	95356253	95356611
chr12|95534922|95535309	4.32416	3.73307	5.60589	4.86689	-0.170579	-0.382637	0.203943	0.00603472	0.0896052	1	3	0	0	Exon (uc001tdp.4/55785, exon 6 of 21)	55785	ENSG00000180263	FGD6	chr12	95534922	95535309
chr12|9598376|9598707	4.72283	6.72882	9.95258	10.0926	-1.09558	-0.584877	-0.02016	0.0063291	0.0909591	2	3	1	1	Promoter (2-3kb)	440081	#N/A	DDX12P	chr12	9598376	9598707
chr12|96027207|96027588	3.58648	3.06789	5.75069	5.01487	-0.483644	-0.708965	0.197523	0.00119016	0.0610486	1	3	0	0	Distal Intergenic	100132594	ENSG00000257150	PGAM1P5	chr12	96027207	96027588
chr12|96436538|96437311	4.15194	4.69048	6.19332	5.56895	-0.423619	-0.247669	0.153307	0.00304239	0.0731652	8	6	3	2	Promoter (<=1kb)	4048	ENSG00000111144	LTA4H	chr12	96436538	96437311
chr12|97078924|97079243	4.72099	5.71929	6.91975	8.17409	-0.791969	-0.515223	-0.240339	0.000694442	0.0606188	0	4	1	1	Exon (uc021rcc.1/uc021rcc.1, exon 9 of 27)	121441	ENSG00000139350	NEDD1	chr12	97078924	97079243
chr12|99151330|99152855	2.17566	2.19564	2.82869	2.57736	-0.244446	-0.231257	0.134235	0.0073865	0.0953269	10	7	2	0	Intron (uc010svd.2/56899, intron 8 of 9)	317	ENSG00000120868	APAF1	chr12	99151330	99152855
chr12|99846576|99847391	4.7967	7.26929	7.7255	10.3145	-1.10456	-0.50479	-0.416976	0.000185265	0.0606188	5	4	0	5	Intron (uc001tge.2/56899, intron 10 of 25)	196472	ENSG00000180219	FAM71C	chr12	99846576	99847391
chr1|30299836|30300154	7.29867	6.16833	9.88347	8.7974	-0.269444	-0.512197	0.16794	0.00737982	0.0953051	0	2	1	0	Distal Intergenic	10076	ENSG00000060656	PTPRU	chr1	30299836	30300154
chr1|30813631|30813982	5.20628	2.74356	5.70992	4.62249	0.171581	-0.752621	0.304801	0.00828583	0.0989938	4	2	1	0	Distal Intergenic	100129196	ENSG00000186056	MATN1-AS1	chr1	30813631	30813982
chr13|100613082|100613331	4.10389	5.53981	5.47385	6.40324	-0.64181	-0.208966	-0.226244	0.00289323	0.0722026	0	1	0	1	Downstream (1-2kb)	85416	ENSG00000139800	ZIC5	chr13	100613082	100613331
chr13|101669115|101670031	2.10307	2.75158	2.59989	2.67899	-0.349192	0.0385704	-0.0432366	0.0024271	0.0690852	4	2	0	0	Intron (uc031qnb.1/100885778, intron 3 of 7)	100885778	ENSG00000233009	NALCN-AS1	chr13	101669115	101670031
chr13|104617976|104618301	6.84423	11.0089	10.3976	14.1291	-1.04571	-0.360005	-0.442425	0.000815894	0.0606188	1	2	1	1	Distal Intergenic	100847092	ENSG00000263741	MIR548AS	chr13	104617976	104618301
chr13|106536971|106537302	7.1056	6.67039	10.2729	10.1239	-0.510742	-0.601928	0.0210774	0.00740659	0.0953269	2	2	1	0	Distal Intergenic	144920	#N/A	LINC00343	chr13	106536971	106537302
chr13|106704891|106705215	5.78019	7.49282	8.5306	10.8236	-0.904985	-0.530592	-0.343454	0.00215459	0.0670902	0	2	1	0	Distal Intergenic	728192	#N/A	LINC00460	chr13	106704891	106705215
chr13|107065585|107066921	1.93219	2.57533	2.67511	2.59176	-0.423695	-0.00917302	0.0456646	0.00281237	0.0716958	5	4	1	0	Distal Intergenic	728192	#N/A	LINC00460	chr13	107065585	107066921
chr13|107149688|107150064	4.78527	5.95145	7.61516	9.79704	-1.03375	-0.719105	-0.363471	0.00284991	0.0719124	8	6	1	1	Intron (uc001vqi.3/1948, intron 2 of 4)	1948	ENSG00000125266	EFNB2	chr13	107149688	107150064
chr13|107381219|107381525	6.86741	6.23634	10.4303	10.918	-0.668865	-0.807932	-0.06592	0.00492354	0.0842229	1	1	0	0	Distal Intergenic	100874173	ENSG00000230156	LINC00443	chr13	107381219	107381525
chr13|107519286|107519934	6.07498	8.58981	8.82279	11.6094	-0.934339	-0.434592	-0.395983	0.00625774	0.0907198	3	5	4	2	Distal Intergenic	100874173	ENSG00000230156	LINC00443	chr13	107519286	107519934
chr13|108051340|108051873	2.28218	1.80649	1.27905	1.85486	0.299104	-0.0381193	-0.536238	0.00361216	0.0767267	2	10	2	0	Intron (uc001vql.3/728215, intron 1 of 2)	728215	ENSG00000204442	FAM155A	chr13	108051340	108051873
chr13|111207454|111208046	2.88425	2.07708	1.51815	1.7401	0.729026	0.255386	-0.19686	0.000737425	0.0606188	0	5	0	0	Intron (uc001vqy.3/55647, intron 1 of 1)	55647	ENSG00000139832	RAB20	chr13	111207454	111208046
chr13|111829195|111829963	3.9128	4.50429	5.19876	6.48523	-0.728955	-0.525857	-0.31899	0.00773544	0.0967066	1	5	2	2	Intron (uc001vrr.2/8874, intron 2 of 18)	8874	ENSG00000102606	ARHGEF7	chr13	111829195	111829963
chr13|112866694|112868036	2.90541	4.50679	4.00246	3.47635	-0.258834	0.374526	0.203314	0.00483918	0.0838997	10	9	1	4	Distal Intergenic	6656	ENSG00000182968	SOX1	chr13	112866694	112868036
chr13|113101178|113101576	3.62587	6.6993	6.07538	6.56525	-0.856522	0.0291595	-0.111877	0.00131456	0.0616432	2	3	0	0	Distal Intergenic	122258	ENSG00000153498	SPACA7	chr13	113101178	113101576
chr13|113705137|113705976	5.26604	7.13431	8.32461	7.5147	-0.512996	-0.0749414	0.147667	0.00174954	0.0642481	4	4	3	1	Intron (uc031qnk.1/23263, intron 4 of 27)	23263	ENSG00000126217	MCF2L	chr13	113705137	113705976
chr13|113783668|113785467	3.51999	3.97328	4.72629	4.6997	-0.417	-0.24224	0.00813876	0.00582484	0.0886787	11	5	0	0	Exon (uc010agq.1/2159, exon 2 of 7)	2159	ENSG00000126218	F10	chr13	113783668	113785467
chr13|113905456|113907018	3.05282	3.1092	3.92775	3.30268	-0.113496	-0.0870936	0.250062	0.00505971	0.0848946	4	7	2	0	Intron (uc021rmu.1/8451, intron 15 of 19)	8451	ENSG00000139842	CUL4A	chr13	113905456	113907018
chr13|114884568|114884886	6.69961	8.50608	10.5297	12.3372	-0.880861	-0.536444	-0.228541	0.00111277	0.0608256	1	4	1	0	Intron (uc001vui.3/22821, intron 1 of 23)	22821	ENSG00000185989	RASA3	chr13	114884568	114884886
chr13|114921841|114922583	2.17055	3.94292	3.18004	3.76428	-0.794313	0.0668902	-0.243331	0.00389266	0.0784234	7	5	2	3	Distal Intergenic	22821	ENSG00000185989	RASA3	chr13	114921841	114922583
chr13|115066792|115067420	4.26264	2.15886	4.224	3.07963	0.468991	-0.512489	0.455854	0.00775997	0.0968429	3	4	3	0	5' UTR	283489	ENSG00000198824	CHAMP1	chr13	115066792	115067420
chr13|19158353|19158683	3.93258	6.37316	7.36467	9.55653	-1.28101	-0.584479	-0.375866	0.00326411	0.0745581	2	4	1	0	Distal Intergenic	100874164	#N/A	LINC00417	chr13	19158353	19158683
chr13|19939245|19940735	3.20259	5.18915	4.49972	5.00688	-0.644673	0.051588	-0.154077	0.00108643	0.0608052	8	9	1	2	Distal Intergenic	100287114	ENSG00000236834	LINC00421	chr13	19939245	19940735
chr13|20758881|20759571	4.82735	3.66747	6.37777	5.82233	-0.270365	-0.66681	0.131456	0.00608972	0.0898586	4	3	3	0	Downstream (2-3kb)	2706	ENSG00000165474	GJB2	chr13	20758881	20759571
chr13|20840202|20840985	3.37419	4.15163	4.9718	4.62199	-0.453974	-0.154837	0.105254	0.00102799	0.0606784	1	1	4	1	Distal Intergenic	10804	ENSG00000121742	GJB6	chr13	20840202	20840985
chr13|20914497|20915549	5.09134	7.24089	7.72429	9.37098	-0.880156	-0.372034	-0.278798	0.00506661	0.0849445	4	6	2	4	Distal Intergenic	100616304	ENSG00000263978	MIR4499	chr13	20914497	20915549
chr13|20979134|20980075	4.68354	5.23775	6.88495	6.41467	-0.453777	-0.292428	0.102069	0.00106267	0.060705	9	10	2	0	Intron (uc001une.3/51084, intron 6 of 7)	100616304	ENSG00000263978	MIR4499	chr13	20979134	20980075
chr13|20993845|20994388	5.51916	8.48085	8.80939	9.02594	-0.709629	-0.0898677	-0.0350345	0.00699586	0.0937052	6	4	1	2	Intron (uc001une.3/51084, intron 5 of 7)	100616304	ENSG00000263978	MIR4499	chr13	20993845	20994388
chr13|21481560|21481980	4.27729	5.2007	6.16545	6.52388	-0.609034	-0.327024	-0.0815235	0.00669203	0.0924081	0	2	1	0	Distal Intergenic	64328	ENSG00000132953	XPO4	chr13	21481560	21481980
chr13|21893338|21894661	4.18704	4.84314	5.62978	5.79519	-0.468925	-0.258911	-0.0417759	0.000775137	0.0606188	7	6	4	2	Intron (uc001unz.2/650794, intron 2 of 2)	650794	#N/A	MIPEPP3	chr13	21893338	21894661
chr13|21927870|21929023	2.82678	2.90848	3.9803	3.53348	-0.321927	-0.280821	0.17179	0.000558804	0.0606188	2	2	2	0	Intron (uc031qkq.1/650794, intron 3 of 4)	650794	#N/A	MIPEPP3	chr13	21927870	21929023
chr13|22417391|22418090	3.84393	3.49091	4.92087	5.17214	-0.428178	-0.567159	-0.0718485	0.00831585	0.0990879	7	6	1	0	Distal Intergenic	100874182	ENSG00000226722	LINC00424	chr13	22417391	22418090
chr13|22773017|22773492	6.63543	7.52261	9.53559	10.3241	-0.637757	-0.456714	-0.114625	0.00264276	0.0705373	1	3	0	0	Intron (uc001uoi.3/uc001uoi.3, intron 1 of 1)	100874182	ENSG00000226722	LINC00424	chr13	22773017	22773492
chr13|23462673|23463032	3.35618	3.76595	4.71789	4.70669	-0.487895	-0.321698	0.00342907	0.00297639	0.0728072	4	1	1	0	Distal Intergenic	646201	#N/A	BASP1P1	chr13	23462673	23463032
chr13|23875110|23875956	2.58311	3.33802	3.44214	3.56171	-0.463461	-0.0935793	-0.0492639	0.00553101	0.0872183	3	5	2	0	Intron (uc001uom.2/6445, intron 6 of 7)	26278	ENSG00000151835	SACS	chr13	23875110	23875956
chr13|23965499|23966234	4.84576	4.65799	6.41157	6.0462	-0.319303	-0.376321	0.0846507	0.00761046	0.0962265	2	2	3	0	Intron (uc001uon.3/26278, intron 2 of 9)	26278	ENSG00000151835	SACS	chr13	23965499	23966234
chr13|24029187|24029952	5.00773	6.63733	7.05972	6.86733	-0.455593	-0.0491452	0.0398619	0.00819642	0.0986541	8	7	4	3	Distal Intergenic	100506697	ENSG00000232977	LINC00327	chr13	24029187	24029952
chr1|32429130|32429522	3.44319	1.72975	2.32002	2.13961	0.6864	-0.306784	0.116789	0.00345894	0.0757498	3	5	1	0	Distal Intergenic	8073	ENSG00000184007	PTP4A2	chr1	32429130	32429522
chr13|24657970|24659355	2.57198	3.24016	3.75707	4.0595	-0.658419	-0.325236	-0.111692	0.00206941	0.0665776	6	5	0	4	Intron (uc001upd.3/221178, intron 3 of 14)	221178	ENSG00000182957	SPATA13	chr13	24657970	24659355
chr13|25084615|25085223	2.94952	3.33187	1.98545	1.80115	0.711561	0.887412	0.140549	8.15159e-05	0.0606188	2	7	0	2	Promoter (1-2kb)	143	ENSG00000102699	PARP4	chr13	25084615	25085223
chr13|25203515|25204319	2.42234	2.60486	3.10846	3.12658	-0.368186	-0.263383	-0.00838836	0.00448101	0.0819097	2	6	1	0	Distal Intergenic	374491	#N/A	TPTE2P6	chr13	25203515	25204319
chr13|25798546|25800533	2.24171	3.15006	2.72827	2.96088	-0.401428	0.0893526	-0.118041	0.00556123	0.0873703	6	4	1	3	Downstream (1-2kb)	9107	ENSG00000139505	MTMR6	chr13	25798546	25800533
chr1|32603658|32604002	3.89693	2.13519	3.53006	2.41951	0.687626	-0.18035	0.54498	0.00296146	0.0726954	3	1	1	0	Intron (uc001bug.3/23633, intron 1 of 13)	23633	ENSG00000025800	KPNA6	chr1	32603658	32604002
chr13|26301700|26302532	3.09935	4.23336	4.88657	4.80439	-0.632385	-0.18255	0.0244714	0.00546359	0.086796	11	6	0	4	Intron (uc001uqk.3/51761, intron 25 of 36)	51761	ENSG00000132932	ATP8A2	chr13	26301700	26302532
chr13|26376149|26376486	5.927	4.36614	8.13959	7.89931	-0.414425	-0.855367	0.0432289	0.00229627	0.0682568	2	4	1	0	Intron (uc001uqk.3/51761, intron 27 of 36)	51761	ENSG00000132932	ATP8A2	chr13	26376149	26376486
chr13|26424281|26425614	1.7474	2.46079	2.32896	2.46253	-0.494933	-0.00101565	-0.0804533	0.00806045	0.0980321	6	6	1	0	Intron (uc001uqk.3/51761, intron 30 of 36)	387914	ENSG00000180730	SHISA2	chr13	26424281	26425614
chr13|26547251|26547937	3.8001	5.35631	5.01132	5.60613	-0.560966	-0.0657656	-0.161814	0.00246631	0.069405	8	6	1	2	Intron (uc001uqk.3/51761, intron 35 of 36)	387914	ENSG00000180730	SHISA2	chr13	26547251	26547937
chr13|26552614|26553003	4.41094	6.34703	6.84422	7.43641	-0.753519	-0.228525	-0.11972	0.00406675	0.0794457	0	2	1	1	Intron (uc001uqk.3/51761, intron 35 of 36)	387914	ENSG00000180730	SHISA2	chr13	26552614	26553003
chr13|26589776|26591351	2.15575	2.92529	3.24071	3.12262	-0.534568	-0.0941734	0.0535559	0.00150208	0.0629089	0	4	1	2	Intron (uc001uqk.3/51761, intron 36 of 36)	387914	ENSG00000180730	SHISA2	chr13	26589776	26591351
chr13|26607053|26607668	3.81164	5.45873	6.48013	6.10599	-0.679813	-0.16166	0.0857974	0.00783404	0.0971256	2	1	0	0	Distal Intergenic	387914	ENSG00000180730	SHISA2	chr13	26607053	26607668
chr13|27267612|27270088	2.57311	3.741	3.45437	3.36579	-0.387432	0.152481	0.0374801	0.00363199	0.0768631	5	5	2	3	Distal Intergenic	2835	ENSG00000132975	GPR12	chr13	27267612	27270088
chr13|27515065|27516500	3.69494	5.71215	6.13809	6.67127	-0.852411	-0.223926	-0.12017	5.74954e-05	0.0606188	4	4	1	4	Distal Intergenic	2835	ENSG00000132975	GPR12	chr13	27515065	27516500
chr13|27524718|27525335	3.3764	4.52448	4.40125	4.88314	-0.532325	-0.110058	-0.149898	0.00314126	0.0737609	5	3	1	0	Distal Intergenic	2835	ENSG00000132975	GPR12	chr13	27524718	27525335
chr13|27627183|27628313	2.35028	3.51988	3.65876	4.27789	-0.86407	-0.281375	-0.225543	0.00537741	0.0864289	11	10	2	2	Distal Intergenic	219333	ENSG00000152484	USP12	chr13	27627183	27628313
chr13|27767669|27768806	1.89785	2.37629	2.46093	2.59371	-0.450651	-0.126308	-0.0758136	0.00617877	0.0903808	2	4	1	0	Distal Intergenic	219333	ENSG00000152484	USP12	chr13	27767669	27768806
chr13|27872102|27873315	2.19458	2.41134	2.75074	2.81945	-0.361465	-0.225576	-0.0355934	0.00644201	0.091333	10	9	2	0	Distal Intergenic	387496	ENSG00000122035	RASL11A	chr13	27872102	27873315
chr13|27910169|27911128	2.85394	3.99329	3.85085	3.88926	-0.44654	0.038084	-0.0143183	0.0079915	0.0977318	1	3	1	1	Distal Intergenic	387496	ENSG00000122035	RASL11A	chr13	27910169	27911128
chr13|28560588|28560942	4.66989	5.42931	8.14515	8.28067	-0.826359	-0.608977	-0.023806	3.50731e-05	0.0606188	5	0	1	0	Promoter (1-2kb)	646625	ENSG00000183463	URAD	chr13	28560588	28560942
chr13|28588953|28589369	4.731	3.54841	7.0305	5.55304	-0.231134	-0.646106	0.340348	0.00509664	0.0850037	7	6	1	0	Exon (uc001urw.3/2322, exon 22 of 24)	646625	ENSG00000183463	URAD	chr13	28588953	28589369
chr13|28625464|28626529	1.50234	2.08967	2.17892	2.21992	-0.563296	-0.0872309	-0.026894	0.00517132	0.0853475	0	3	2	0	Intron (uc001urw.3/2322, intron 5 of 23)	2322	ENSG00000122025	FLT3	chr13	28625464	28626529
chr13|28879571|28880696	3.72713	4.3605	5.09693	4.98634	-0.419915	-0.193488	0.031649	0.00683918	0.093083	4	6	1	1	Promoter (1-2kb)	2321	ENSG00000102755	FLT1	chr13	28879571	28880696
chr13|29025533|29026557	3.70029	5.78528	6.86397	8.36754	-1.17717	-0.532416	-0.28576	0.000522297	0.0606188	6	9	0	4	Intron (uc001usb.3/2321, intron 3 of 29)	2321	ENSG00000102755	FLT1	chr13	29025533	29026557
chr13|29157972|29158776	3.95222	4.25237	5.11982	5.64656	-0.514708	-0.409103	-0.141279	0.00352426	0.0761756	1	5	2	0	Distal Intergenic	51371	ENSG00000132963	POMP	chr13	29157972	29158776
chr13|29258385|29258730	2.60525	2.54241	4.34245	4.0362	-0.631579	-0.666803	0.105509	0.00237652	0.0689302	2	3	1	0	Distal Intergenic	51371	ENSG00000132963	POMP	chr13	29258385	29258730
chr13|29295600|29296127	4.04254	4.15216	6.50178	6.12483	-0.599409	-0.560808	0.0861651	0.000122906	0.0606188	11	4	1	0	Promoter (2-3kb)	283537	ENSG00000139508	SLC46A3	chr13	29295600	29296127
chr13|29645232|29645725	2.46043	2.92753	3.80269	3.98673	-0.696294	-0.445523	-0.0681875	0.00156264	0.0632277	1	3	1	2	Intron (uc001usl.4/23281, intron 2 of 13)	23281	ENSG00000132938	MTUS2	chr13	29645232	29645725
chr13|29829252|29829500	4.83926	8.36119	7.55812	8.24278	-0.768345	0.0205787	-0.125103	0.00214474	0.0670838	0	2	0	0	Intron (uc001usl.4/23281, intron 3 of 13)	23281	ENSG00000132938	MTUS2	chr13	29829252	29829500
chr13|29873458|29873789	4.92322	2.99128	6.30575	5.09475	-0.0494072	-0.768246	0.307657	0.00230787	0.0683464	2	1	1	0	Intron (uc001usl.4/23281, intron 4 of 13)	23281	ENSG00000132938	MTUS2	chr13	29873458	29873789
chr13|30097784|30098942	3.75146	4.97546	5.40731	6.15254	-0.71373	-0.306351	-0.186271	0.000174794	0.0606188	1	5	2	0	Exon (uc001uso.3/6541, exon 6 of 13)	23281	ENSG00000132938	MTUS2	chr13	30097784	30098942
chr13|30267668|30269247	2.73674	4.0888	3.90096	4.66381	-0.769049	-0.189832	-0.257679	0.00350182	0.0760537	13	12	1	2	Distal Intergenic	6541	ENSG00000139514	SLC7A1	chr13	30267668	30269247
chr13|30522135|30523330	3.48999	3.7625	4.48239	4.23741	-0.279959	-0.171491	0.0810852	0.00520906	0.085547	4	5	2	0	Intron (uc010aav.3/440131, intron 4 of 4)	440131	#N/A	LINC00544	chr13	30522135	30523330
chr13|30673240|30673854	2.48814	2.88094	3.32525	3.35861	-0.4328	-0.221329	-0.0144016	0.00390332	0.0784246	0	2	1	0	Distal Intergenic	440131	#N/A	LINC00544	chr13	30673240	30673854
chr13|30833530|30833981	4.24345	2.14273	2.45388	2.3369	0.860642	-0.125144	0.0704709	0.00106267	0.060705	6	9	2	0	Intron (uc001uss.4/84056, intron 3 of 10)	84056	ENSG00000102781	KATNAL1	chr13	30833530	30833981
chr13|31287039|31287683	3.48813	4.91539	4.75764	5.98524	-0.778955	-0.284102	-0.331162	0.00206941	0.0665776	3	4	4	1	Promoter (<=1kb)	241	ENSG00000132965	ALOX5AP	chr13	31287039	31287683
chr13|31305404|31307221	3.35207	4.54933	4.35519	4.31553	-0.364488	0.0761139	0.0131969	0.00308156	0.0733836	10	9	1	1	Promoter (2-3kb)	241	ENSG00000132965	ALOX5AP	chr13	31305404	31307221
chr1|33132499|33133112	4.70996	2.29559	4.0869	3.25056	0.535028	-0.501822	0.330319	0.0047736	0.0835337	3	6	2	0	Intron (uc001bvr.3/5928, intron 3 of 11)	5928	ENSG00000162521	RBBP4	chr1	33132499	33133112
chr13|31456350|31457210	2.99501	3.09951	4.12217	4.25599	-0.506934	-0.457453	-0.0460917	0.000615236	0.0606188	13	10	1	4	Exon (uc001utg.2/100507064, exon 4 of 4)	84935	ENSG00000102802	MEDAG	chr13	31456350	31457210
chr13|31578974|31579383	3.55462	6.46328	5.14334	4.14511	-0.221715	0.640854	0.311293	0.00708193	0.0940715	7	5	1	3	Distal Intergenic	122046	ENSG00000175664	TEX26	chr13	31578974	31579383
chr13|31630314|31631240	4.21372	5.72233	6.00757	6.74426	-0.678566	-0.237059	-0.166879	0.000811762	0.0606188	7	7	2	3	Distal Intergenic	10808	ENSG00000120694	HSPH1	chr13	31630314	31631240
chr13|32829344|32829715	5.24876	5.07648	8.34791	7.73601	-0.559612	-0.607762	0.109826	0.00363199	0.0768631	4	5	1	1	Intron (uc001utx.3/10129, intron 51 of 60)	10129	ENSG00000073910	FRY	chr13	32829344	32829715
chr13|32961749|32962105	4.78321	2.56696	5.22777	3.65639	0.387559	-0.510358	0.515774	0.00408905	0.0795579	3	3	1	0	Intron (uc001uub.1/675, intron 24 of 26)	675	ENSG00000139618	BRCA2	chr13	32961749	32962105
chr1|33302700|33303091	3.89694	2.92548	3.48989	2.77473	0.489995	0.0763268	0.330833	0.00459878	0.0825659	3	3	0	0	3' UTR	64766	ENSG00000116497	S100PBP	chr1	33302700	33303091
chr1|33306684|33307648	3.99578	2.25979	3.55701	3.00864	0.409368	-0.412924	0.241554	0.00557388	0.0874193	6	10	2	0	Intron (uc001bvz.4/64766, intron 5 of 6)	64766	ENSG00000116497	S100PBP	chr1	33306684	33307648
chr13|34209390|34210565	2.93829	3.24044	4.1317	3.88867	-0.404298	-0.263086	0.0874606	0.00250843	0.0697463	1	2	3	1	Intron (uc001uux.3/90627, intron 3 of 17)	90627	ENSG00000133121	STARD13	chr13	34209390	34210565
chr13|34374035|34374351	7.12116	7.82634	11.0196	11.7748	-0.725516	-0.58929	-0.0956337	0.000309054	0.0606188	0	1	1	0	Distal Intergenic	5983	ENSG00000133119	RFC3	chr13	34374035	34374351
chr13|34935566|34935842	5.26387	7.5368	7.2231	8.75736	-0.734373	-0.216543	-0.277879	0.000537003	0.0606188	1	0	0	1	Distal Intergenic	100874179	ENSG00000225179	LINC00457	chr13	34935566	34935842
chr1|33539741|33540122	4.97697	2.80713	3.81434	3.38354	0.556734	-0.269439	0.172898	0.00754531	0.0959843	0	3	0	0	Distal Intergenic	113451	ENSG00000142920	AZIN2	chr1	33539741	33540122
chr13|36088521|36088875	6.37482	4.59146	10.6535	10.3378	-0.697475	-1.17091	0.0434024	0.00517132	0.0853475	5	3	1	0	Intron (uc021ric.1/26960, intron 40 of 56)	26960	ENSG00000172915	NBEA	chr13	36088521	36088875
chr13|36298970|36300054	1.82785	2.12532	2.22053	2.59478	-0.505466	-0.287932	-0.224713	0.00359572	0.0765916	1	1	0	0	Intron (uc001uvc.3/100302239, intron 1 of 1)	9201	ENSG00000133083	DCLK1	chr13	36298970	36300054
chr13|36758688|36759809	2.11691	2.15754	2.69372	2.68228	-0.341499	-0.31407	0.00614183	0.00290117	0.0722686	2	2	2	0	Intron (uc001uvj.3/54937, intron 6 of 10)	54937	ENSG00000120669	SOHLH2	chr13	36758688	36759809
chr1|33707325|33707663	3.5472	2.40265	3.94158	4.90311	-0.467016	-1.02907	-0.314923	0.00287083	0.0721171	2	3	1	0	Distal Intergenic	149076	ENSG00000160094	ZNF362	chr1	33707325	33707663
chr1|33773704|33774100	3.86766	2.15649	2.27286	2.14906	0.847753	0.00498018	0.0808027	0.00231528	0.068399	2	5	0	0	Intron (uc031plq.1/127550, intron 4 of 4)	127550	ENSG00000184389	A3GALT2	chr1	33773704	33774100
chr13|38218932|38220092	4.33025	4.94182	5.97368	7.0038	-0.693686	-0.503096	-0.229518	0.00158432	0.0633954	6	7	2	2	Intron (uc010abv.3/7223, intron 6 of 8)	10631	ENSG00000133110	POSTN	chr13	38218932	38220092
chr13|38324958|38325242	5.58327	5.76371	8.12308	8.00003	-0.518893	-0.473007	0.0220218	0.00773894	0.096717	1	1	0	1	Intron (uc010abv.3/7223, intron 1 of 8)	7223	ENSG00000133107	TRPC4	chr13	38324958	38325242
chr13|38804317|38804872	4.64688	3.96009	6.70757	6.44242	-0.47134	-0.702069	0.0581862	0.00514319	0.0853475	9	8	2	0	Distal Intergenic	100874188	ENSG00000223685	LINC00571	chr13	38804317	38804872
chr13|39093741|39094177	3.67919	2.097	2.19749	2.69581	0.448672	-0.362388	-0.294858	0.00801321	0.0978443	4	10	2	1	Distal Intergenic	100874147	#N/A	LINC00366	chr13	39093741	39094177
chr13|39701729|39701991	5.22178	5.53605	7.91671	8.52504	-0.707163	-0.622848	-0.106805	0.00546111	0.0867777	0	2	0	1	Distal Intergenic	387921	ENSG00000188811	NHLRC3	chr13	39701729	39701991
chr13|39991504|39991892	3.53007	2.7867	4.86429	7.21459	-1.03122	-1.37236	-0.568688	0.00458624	0.0824494	2	5	0	2	Intron (uc001uxf.3/10186, intron 2 of 3)	10186	ENSG00000183722	LHFPL6	chr13	39991504	39991892
chr13|40281356|40281730	4.59289	3.47243	6.23589	6.07444	-0.403349	-0.806805	0.037845	0.0009571	0.0606188	4	4	1	0	Intron (uc001uxh.2/57511, intron 13 of 18)	100422940	ENSG00000264171	MIR4305	chr13	40281356	40281730
chr13|41137340|41137659	4.82325	7.34536	7.25653	8.91156	-0.885672	-0.278845	-0.296399	0.00267194	0.0707141	1	2	1	1	Intron (uc010acc.1/2308, intron 1 of 2)	2308	ENSG00000150907	FOXO1	chr13	41137340	41137659
chr13|41171756|41172345	4.54473	7.34189	6.49634	6.69687	-0.559292	0.132665	-0.0438609	0.00241491	0.0690791	4	7	3	5	Intron (uc010acc.1/2308, intron 1 of 2)	2308	ENSG00000150907	FOXO1	chr13	41171756	41172345
chr13|41648361|41650809	1.77758	2.17258	2.3693	2.37001	-0.414977	-0.125484	-0.000436403	0.000181426	0.0606188	11	8	2	0	Exon (uc001uxt.3/11193, exon 8 of 10)	11193	ENSG00000120688	WBP4	chr13	41648361	41650809
chr13|42127250|42127597	4.54826	1.98522	4.50794	3.22809	0.494634	-0.701384	0.481789	0.0064948	0.0915769	3	2	1	0	Distal Intergenic	100847026	ENSG00000284584	MIR5006	chr13	42127250	42127597
chr13|43675484|43675837	4.83642	2.1301	4.86774	3.94502	0.293909	-0.889108	0.303221	0.00404642	0.0793491	4	0	1	0	Intron (uc001uyy.3/29103, intron 5 of 5)	29103	ENSG00000120675	DNAJC15	chr13	43675484	43675837
chr13|43770581|43770887	4.37849	4.3367	6.29452	8.0762	-0.883243	-0.897078	-0.35958	0.000121312	0.0606188	0	3	0	0	Distal Intergenic	55068	ENSG00000120658	ENOX1	chr13	43770581	43770887
chr13|44197375|44197740	5.99366	7.03031	9.74726	10.7077	-0.837141	-0.60699	-0.135582	0.00654801	0.0917845	3	3	1	0	Intron (uc001uza.4/55068, intron 1 of 16)	55068	ENSG00000120658	ENOX1	chr13	44197375	44197740
chr13|44970942|44971337	3.92947	7.19111	5.71179	5.46673	-0.476342	0.395537	0.0632649	0.00823728	0.098793	1	4	0	3	Intron (uc001uzj.3/387923, intron 2 of 2)	387923	ENSG00000151778	SERP2	chr13	44970942	44971337
chr13|45771351|45771996	2.5854	1.81318	2.87421	3.28724	-0.346492	-0.858356	-0.19371	0.0069674	0.0936233	5	3	3	0	Intron (uc001uzw.3/2963, intron 4 of 7)	386618	ENSG00000180332	KCTD4	chr13	45771351	45771996
chr13|45802896|45803498	3.52921	3.13388	4.80984	4.29611	-0.283686	-0.455081	0.162958	0.0029493	0.0726152	1	2	2	0	Intron (uc001uzw.3/2963, intron 5 of 7)	386618	ENSG00000180332	KCTD4	chr13	45802896	45803498
chr13|45868050|45868659	4.51427	2.97063	5.60504	4.88392	-0.113545	-0.717271	0.198686	0.00795544	0.0976126	4	1	3	0	Distal Intergenic	677814	ENSG00000199477	SNORA31	chr13	45868050	45868659
chr13|46624284|46624590	5.32517	4.94136	7.97082	6.48532	-0.284349	-0.392268	0.297551	0.00290914	0.0723237	0	2	0	0	Promoter (2-3kb)	23091	ENSG00000123200	ZC3H13	chr13	46624284	46624590
chr13|46645736|46646167	4.4608	5.23687	7.20295	7.96727	-0.836784	-0.60538	-0.145498	0.00724739	0.0948239	9	6	1	3	Intron (uc001vau.1/100509894, intron 1 of 3)	100509894	ENSG00000235903	CPB2-AS1	chr13	46645736	46646167
chr13|47277230|47277570	4.37471	2.10699	4.76377	3.76139	0.217923	-0.836079	0.340839	0.00692963	0.0935231	2	4	1	0	Intron (uc010acp.2/23143, intron 11 of 12)	2098	ENSG00000139684	ESD	chr13	47277230	47277570
chr13|47337487|47338235	2.21664	2.74099	2.72922	2.81586	-0.345201	-0.0388756	-0.0450821	0.00770749	0.0965715	5	9	1	3	Distal Intergenic	2098	ENSG00000139684	ESD	chr13	47337487	47338235
chr13|47908113|47908392	4.33142	4.38538	6.23335	7.57061	-0.805569	-0.787708	-0.280401	0.00337011	0.0751345	1	1	0	1	Distal Intergenic	3356	ENSG00000102468	HTR2A	chr13	47908113	47908392
chr13|49080374|49081268	2.33399	4.23487	3.96382	4.51726	-0.952649	-0.0931274	-0.188556	0.000146719	0.0606188	0	4	0	3	Intron (uc001vch.3/1102, intron 10 of 14)	1102	ENSG00000136161	RCBTB2	chr13	49080374	49081268
chr13|49168834|49169133	5.31557	4.5702	6.81764	6.94945	-0.386674	-0.60464	-0.0276263	0.0065718	0.091803	1	3	0	0	Distal Intergenic	100129597	ENSG00000233610	LINC00462	chr13	49168834	49169133
chr13|49732199|49732582	3.58534	3.40123	4.39431	4.66319	-0.379207	-0.455263	-0.0856828	0.00834597	0.099237	1	6	1	0	Intron (uc001vcm.3/22862, intron 8 of 25)	22862	ENSG00000102531	FNDC3A	chr13	49732199	49732582
chr13|50581242|50582338	1.85315	2.49426	2.35087	2.35337	-0.344748	0.083884	-0.00153399	0.00555114	0.0873703	3	1	2	1	Intron (uc001vdp.1/10206, intron 3 of 3)	283518	ENSG00000198553	KCNRG	chr13	50581242	50582338
chr13|50839368|50840461	2.42764	3.57168	3.40305	4.06156	-0.742476	-0.185428	-0.255204	0.00725067	0.0948325	8	2	1	2	Intron (uc010adl.1/10301, intron 1 of 1)	145165	#N/A	ST13P4	chr13	50839368	50840461
chr13|51102016|51103667	5.34464	7.05461	7.26725	8.24963	-0.626239	-0.225763	-0.18292	0.00779163	0.0969676	10	12	3	5	Exon (uc001vef.1/10301, exon 6 of 6)	100874074	ENSG00000237152	DLEU7-AS1	chr13	51102016	51103667
chr13|51721788|51722656	2.92771	3.42933	4.18583	4.08682	-0.481206	-0.253052	0.0345361	0.000993518	0.0606188	1	1	0	0	Intron (uc031qlq.1/647166, intron 1 of 3)	647166	ENSG00000226792	C13orf42	chr13	51721788	51722656
chr13|52113194|52113582	5.15965	4.73995	8.39874	10.7865	-1.06387	-1.18628	-0.360975	2.95731e-05	0.0606188	7	6	0	0	Distal Intergenic	100616423	ENSG00000266611	MIR4703	chr13	52113194	52113582
chr13|52917113|52919260	3.27728	4.76422	4.85109	5.50819	-0.74908	-0.209337	-0.183267	0.00683608	0.093083	10	7	1	3	Distal Intergenic	100887750	ENSG00000243406	MRPS31P5	chr13	52917113	52919260
chr13|53812097|53812768	7.40892	13.7132	11.9057	14.1495	-0.933414	-0.0451824	-0.249097	0.00446269	0.0818263	7	5	3	5	Distal Intergenic	10562	ENSG00000102837	OLFM4	chr13	53812097	53812768
chr13|53925576|53925862	6.00654	5.0596	7.76133	8.77007	-0.546055	-0.793567	-0.176285	0.00608972	0.0898586	1	1	0	0	Distal Intergenic	10562	ENSG00000102837	OLFM4	chr13	53925576	53925862
chr13|54185410|54185721	5.32055	2.17503	4.41802	3.61989	0.555631	-0.734909	0.287454	0.00754873	0.0959843	1	4	0	0	Distal Intergenic	100861552	ENSG00000261517	LINC00558	chr13	54185410	54185721
chr13|54359660|54359979	4.89654	4.80412	7.32069	8.45977	-0.788857	-0.816346	-0.20864	0.00102232	0.0606784	0	1	1	0	Distal Intergenic	100861552	ENSG00000261517	LINC00558	chr13	54359660	54359979
chr13|54435998|54436275	5.56118	3.65058	7.46636	7.35088	-0.402525	-1.00979	0.0224873	0.00702125	0.0937763	1	2	0	0	Intron (uc031qlu.1/100861552, intron 4 of 5)	100861552	ENSG00000261517	LINC00558	chr13	54435998	54436275
chr1|35462995|35463340	4.63155	2.05261	3.90618	3.70769	0.320976	-0.853058	0.0752381	0.00796264	0.0976126	2	4	1	0	Intron (uc001byf.1/9204, intron 14 of 15)	9204	ENSG00000163867	ZMYM6	chr1	35462995	35463340
chr1|3553089|3556442	2.86668	2.61098	3.43058	2.94549	-0.0391253	-0.173915	0.219947	0.00739989	0.0953269	4	7	3	0	3' UTR	49856	ENSG00000116213	WRAP73	chr1	3553089	3556442
chr13|57121849|57122272	3.8303	2.71313	4.63688	5.46567	-0.51294	-1.01044	-0.237243	0.00329556	0.0746758	0	2	1	0	Distal Intergenic	729246	ENSG00000227151	PRR20D	chr13	57121849	57122272
chr13|57779815|57780836	2.19248	3.21174	2.83977	4.22329	-0.945808	-0.395012	-0.572594	0.00364527	0.0769697	5	3	0	0	Distal Intergenic	729250	ENSG00000234278	PRR20E	chr13	57779815	57780836
chr13|57798999|57799573	3.50999	2.6631	4.99337	4.06865	-0.213085	-0.611447	0.295464	0.00633771	0.0909591	5	4	0	0	Distal Intergenic	729250	ENSG00000234278	PRR20E	chr13	57798999	57799573
chr13|58630805|58631126	6.0944	3.16051	4.82727	6.47385	-0.0871411	-1.03447	-0.423418	0.00856374	0.0998999	0	4	1	0	Distal Intergenic	27253	ENSG00000118946	PCDH17	chr13	58630805	58631126
chr13|58779037|58779334	5.40842	4.54693	8.41226	7.20666	-0.414124	-0.664439	0.223163	0.00466411	0.0829058	1	1	0	0	Distal Intergenic	27253	ENSG00000118946	PCDH17	chr13	58779037	58779334
chr1|35927249|35927567	6.08894	2.80149	4.80488	4.46055	0.448971	-0.671028	0.107281	0.00819642	0.0986541	0	3	1	0	Intron (uc001byx.3/79932, intron 8 of 20)	79932	ENSG00000142687	KIAA0319L	chr1	35927249	35927567
chr13|60698409|60698697	4.68806	2.78225	6.99598	6.65779	-0.506052	-1.25879	0.0714832	0.00370393	0.077314	1	1	0	0	Intron (uc001vht.4/81624, intron 2 of 27)	100874196	ENSG00000223815	DIAPH3-AS2	chr13	60698409	60698697
chr13|61798808|61799096	5.27388	4.92073	8.39723	6.93342	-0.394704	-0.494696	0.276345	0.00550594	0.0871131	0	1	0	1	Distal Intergenic	100422973	ENSG00000266663	MIR3169	chr13	61798808	61799096
chr13|62953378|62954323	2.63248	3.97814	3.6072	3.49739	-0.409854	0.185815	0.0446022	0.0023121	0.068399	2	7	1	5	Distal Intergenic	64881	ENSG00000197991	PCDH20	chr13	62953378	62954323
chr13|63014802|63015506	4.78801	5.83745	7.71766	8.54551	-0.83574	-0.549829	-0.147004	0.00176406	0.0643418	7	3	4	2	Distal Intergenic	64881	ENSG00000197991	PCDH20	chr13	63014802	63015506
chr1|3649296|3651817	3.95205	4.74618	5.3563	5.26468	-0.413743	-0.149578	0.0248906	0.00491236	0.0842064	12	9	3	2	3' UTR	7161	ENSG00000078900	TP73	chr1	3649296	3651817
chr13|65037149|65037793	5.90232	6.06784	9.45153	9.74262	-0.723029	-0.683127	-0.0437613	0.00169343	0.0639922	5	5	3	0	Distal Intergenic	283491	#N/A	OR7E156P	chr13	65037149	65037793
chr13|66302819|66303165	5.91095	3.71041	8.42921	7.78973	-0.398182	-1.06999	0.113825	0.00586463	0.0888289	3	2	1	0	Distal Intergenic	100874064	ENSG00000228842	PCDH9-AS2	chr13	66302819	66303165
chr13|66666540|66666901	5.6692	3.13489	7.11883	4.97132	0.189517	-0.665213	0.518011	0.00586197	0.0888289	5	3	1	0	Distal Intergenic	100874064	ENSG00000228842	PCDH9-AS2	chr13	66666540	66666901
chr13|67409399|67409728	6.6493	6.22829	8.76812	11.5771	-0.800005	-0.894372	-0.40094	0.00160852	0.0634778	1	2	1	1	Intron (uc031qmb.1/100874064, intron 1 of 5)	100874064	ENSG00000228842	PCDH9-AS2	chr13	67409399	67409728
chr13|68475536|68476483	2.52439	2.62603	3.62049	3.30273	-0.387721	-0.330776	0.132528	0.00569153	0.0879002	6	2	2	0	Distal Intergenic	5101	ENSG00000184226	PCDH9	chr13	68475536	68476483
chr13|68991269|68992407	2.10495	3.37041	3.50763	4.01636	-0.9321	-0.252963	-0.195393	0.000788129	0.0606188	1	2	0	3	Distal Intergenic	338862	ENSG00000281778	LINC00550	chr13	68991269	68992407
chr13|69387487|69387923	3.32412	2.47638	6.21103	5.71949	-0.782913	-1.20765	0.118947	0.000187259	0.0606188	11	8	1	0	Distal Intergenic	338862	ENSG00000281778	LINC00550	chr13	69387487	69387923
chr13|70272413|70272693	4.1449	2.57852	5.58793	6.23112	-0.588154	-1.27295	-0.157177	0.0017787	0.0644853	1	1	0	0	Downstream (2-3kb)	6315	#N/A	ATXN8OS	chr13	70272413	70272693
chr13|70607512|70608268	4.46785	3.94844	6.28071	7.23059	-0.694533	-0.872832	-0.203186	0.00252456	0.0698514	2	5	3	0	Intron (uc001vip.3/57626, intron 1 of 10)	6315	#N/A	ATXN8OS	chr13	70607512	70608268
chr13|70907781|70908120	6.75502	5.61474	10.1606	10.8198	-0.679646	-0.946385	-0.0906935	0.00216846	0.0671615	2	3	1	0	Distal Intergenic	57626	ENSG00000150361	KLHL1	chr13	70907781	70908120
chr13|71415369|71415986	4.45242	5.49768	6.0465	7.6037	-0.772112	-0.467878	-0.330602	0.00398602	0.0789225	2	4	1	2	Distal Intergenic	100885781	ENSG00000226846	LINC00348	chr13	71415369	71415986
chr13|72101803|72102809	2.20113	2.82879	3.21656	3.53128	-0.681945	-0.320002	-0.134671	0.00101387	0.0606784	1	3	0	0	Intron (uc021rkj.1/1602, intron 6 of 10)	1602	ENSG00000276644	DACH1	chr13	72101803	72102809
chr13|73608108|73608500	4.73233	2.66682	4.89692	4.61482	0.036277	-0.791154	0.0856017	0.00495048	0.0843174	2	0	1	0	Distal Intergenic	688	ENSG00000102554	KLF5	chr13	73608108	73608500
chr13|76380347|76381007	3.29538	2.84823	4.60615	3.64768	-0.146537	-0.356916	0.336583	0.000108669	0.0606188	1	2	1	0	Promoter (1-2kb)	4008	ENSG00000136153	LMO7	chr13	76380347	76381007
chr1|3764131|3765021	2.63483	2.37395	3.34486	3.24567	-0.300803	-0.451227	0.0434292	0.00652727	0.0916589	4	4	1	0	Exon (uc001aky.2/9731, exon 4 of 22)	9731	ENSG00000116198	CEP104	chr1	3764131	3765021
chr13|76444849|76445200	5.87969	6.88805	9.73052	13.2044	-1.1672	-0.938848	-0.440427	0.00108393	0.0608052	5	2	0	0	Promoter (<=1kb)	729420	ENSG00000178734	LMO7DN	chr13	76444849	76445200
chr13|78028247|78028603	5.77836	2.94771	7.16501	6.56007	-0.183052	-1.15412	0.127257	0.003798	0.0778392	3	1	1	0	Distal Intergenic	8796	ENSG00000136155	SCEL	chr13	78028247	78028603
chr1|37819476|37819792	5.95295	3.43321	3.52203	3.7408	0.670257	-0.123788	-0.0869395	0.00294123	0.0726152	0	4	1	1	Distal Intergenic	728431	ENSG00000233621	LINC01137	chr1	37819476	37819792
chr13|79952782|79953163	6.38859	3.03846	6.06793	4.39392	0.539988	-0.53217	0.465697	0.00796264	0.0976126	7	6	1	0	Exon (uc001vky.2/64062, exon 2 of 21)	64062	ENSG00000139746	RBM26	chr13	79952782	79953163
chr13|80707530|80707861	6.71917	9.19199	11.5247	14.2488	-1.08448	-0.63239	-0.306113	0.000227552	0.0606188	3	4	1	0	Distal Intergenic	10253	ENSG00000136158	SPRY2	chr13	80707530	80707861
chr13|82712933|82713264	4.2025	3.49282	6.69491	5.64163	-0.424866	-0.691722	0.246953	0.000508461	0.0606188	2	1	1	0	Distal Intergenic	114798	ENSG00000178235	SLITRK1	chr13	82712933	82713264
chr13|83031974|83032803	3.43462	3.67919	5.02743	4.05802	-0.240627	-0.141391	0.309043	0.000839191	0.0606188	2	3	2	0	Distal Intergenic	114798	ENSG00000178235	SLITRK1	chr13	83031974	83032803
chr13|83107696|83108046	5.71806	3.28677	7.13062	6.83683	-0.2578	-1.05666	0.0607006	0.00602377	0.0895769	4	0	1	0	Distal Intergenic	114798	ENSG00000178235	SLITRK1	chr13	83107696	83108046
chr13|83439706|83440100	4.0285	3.35601	5.61245	5.80439	-0.526902	-0.790398	-0.0485125	0.00562984	0.0877186	5	4	1	0	Distal Intergenic	114798	ENSG00000178235	SLITRK1	chr13	83439706	83440100
chr13|84145192|84145851	3.92513	3.18404	5.11282	5.55603	-0.501316	-0.803194	-0.119934	0.00590737	0.0889757	3	5	2	0	Distal Intergenic	114798	ENSG00000178235	SLITRK1	chr13	84145192	84145851
chr13|84152236|84152548	4.55703	5.01085	7.00925	7.60176	-0.73824	-0.601278	-0.117073	0.00278676	0.0716515	0	2	0	0	Distal Intergenic	114798	ENSG00000178235	SLITRK1	chr13	84152236	84152548
chr13|84451729|84452159	2.74182	3.15427	4.4303	5.74067	-1.06608	-0.863911	-0.373815	0.00132001	0.0617149	9	8	3	1	3' UTR	114798	ENSG00000178235	SLITRK1	chr13	84451729	84452159
chr13|84987271|84987641	4.89089	2.2149	5.1581	4.42507	0.144399	-0.998456	0.221141	0.00465775	0.0829058	8	5	1	0	Intron (uc031qmn.1/100874128, intron 3 of 6)	100874128	#N/A	LINC00333	chr13	84987271	84987641
chr1|38673188|38674005	3.38943	4.27578	2.33362	2.55821	0.405907	0.74105	-0.132566	0.00655395	0.091803	2	5	2	2	Downstream (<1kb)	339442	ENSG00000237290	LINC01343	chr1	38673188	38674005
chr13|87232987|87233263	5.48286	4.83394	8.02186	8.14921	-0.571732	-0.75346	-0.0227228	0.00447082	0.0818652	1	1	0	0	Distal Intergenic	84189	ENSG00000184564	SLITRK6	chr13	87232987	87233263
chr13|87468415|87468821	4.8622	3.04831	6.55254	6.99107	-0.523902	-1.1975	-0.0934574	0.00109397	0.0608256	8	5	1	0	Distal Intergenic	100616182	ENSG00000266052	MIR4500	chr13	87468415	87468821
chr13|87732444|87733239	5.08278	5.48032	6.6563	7.20227	-0.502833	-0.394191	-0.113731	0.00389089	0.0784234	6	4	2	2	Distal Intergenic	100616182	ENSG00000266052	MIR4500	chr13	87732444	87733239
chr13|88435006|88435273	5.05346	4.39765	7.60617	7.3126	-0.533113	-0.733649	0.056787	0.0080641	0.0980484	1	1	0	1	Distal Intergenic	26050	ENSG00000165300	SLITRK5	chr13	88435006	88435273
chr13|88796614|88796978	4.59457	4.74043	7.17309	8.01859	-0.80342	-0.758331	-0.160755	0.00787668	0.0973071	1	2	1	0	Distal Intergenic	100874168	#N/A	LINC00433	chr13	88796614	88796978
chr13|92660407|92660912	4.28979	1.92506	2.64039	2.68256	0.677299	-0.478705	-0.022857	0.00353231	0.0762095	1	3	2	0	Intron (uc010tif.2/2262, intron 6 of 7)	2262	ENSG00000179399	GPC5	chr13	92660407	92660912
chr13|93129824|93130118	6.90573	9.67734	11.0746	11.7917	-0.771911	-0.285093	-0.0905198	0.00473467	0.0832448	1	1	0	1	Intron (uc010tif.2/2262, intron 7 of 7)	100873969	ENSG00000235984	GPC5-AS1	chr13	93129824	93130118
chr13|95055371|95055982	5.98578	3.84805	7.63562	6.93028	-0.211374	-0.848786	0.139833	0.00220857	0.0675229	8	7	2	0	3' UTR	1638	ENSG00000080166	DCT	chr13	95055371	95055982
chr13|96065463|96066000	3.96923	2.48767	4.07249	4.17765	-0.0738328	-0.747897	-0.036779	0.00527577	0.0858829	3	2	1	0	Distal Intergenic	9071	ENSG00000134873	CLDN10	chr13	96065463	96066000
chr13|96129430|96129721	5.24519	9.00277	8.30325	8.55073	-0.705052	0.0743218	-0.042371	0.00207131	0.0665776	1	1	0	0	Intron (uc001vmg.2/9071, intron 1 of 4)	9071	ENSG00000134873	CLDN10	chr13	96129430	96129721
chr1|39614792|39615336	4.17315	2.43584	3.27108	3.00787	0.472396	-0.30432	0.121028	0.00046607	0.0606188	1	2	2	0	Intron (uc001cdc.2/23499, intron 1 of 61)	23499	ENSG00000127603	MACF1	chr1	39614792	39615336
chr13|97348550|97349083	4.56051	4.23231	6.76842	7.85772	-0.784914	-0.892665	-0.215291	0.000203143	0.0606188	7	5	1	0	Intron (uc001vmw.4/266722, intron 1 of 1)	100887754	#N/A	LINC00359	chr13	97348550	97349083
chr13|98732363|98732748	4.41485	2.0033	2.67335	2.04431	1.11075	-0.0292376	0.387032	0.00493699	0.0843022	4	8	1	0	Distal Intergenic	10160	ENSG00000152767	FARP1	chr13	98732363	98732748
chr1|40081187|40082472	2.07899	2.10853	1.60827	1.60188	0.376117	0.396477	0.00574619	0.00663766	0.0922263	0	5	1	0	Distal Intergenic	26508	ENSG00000163909	HEYL	chr1	40081187	40082472
chr1|40291862|40292508	3.17781	1.82066	2.05681	1.95184	0.703199	-0.100375	0.0755723	0.000759547	0.0606188	5	9	2	0	Distal Intergenic	54802	ENSG00000043514	TRIT1	chr1	40291862	40292508
chr1|40705258|40705644	5.31849	3.12682	5.81901	4.50685	0.238896	-0.527424	0.368655	0.00672852	0.092634	4	6	0	0	Exon (uc001cfc.4/6018, exon 8 of 8)	127391	ENSG00000188800	TMCO2	chr1	40705258	40705644
chr14|100279877|100280273	4.68585	2.40239	4.24635	3.20783	0.546714	-0.417124	0.404629	0.00400788	0.0790965	9	7	1	0	Intron (uc010avt.1/2009, intron 1 of 10)	2009	ENSG00000066629	EML1	chr14	100279877	100280273
chr14|100381671|100382120	5.18862	2.41743	3.64074	3.60165	0.526692	-0.575186	0.0155742	0.0068268	0.0930462	4	7	2	0	Intron (uc010tww.2/2009, intron 16 of 22)	51466	ENSG00000196405	EVL	chr14	100381671	100382120
chr14|100510452|100510855	5.33646	2.07426	3.38752	3.08916	0.788668	-0.574615	0.133017	0.00235809	0.0687373	2	7	1	0	Intron (uc001ygt.3/51466, intron 1 of 13)	51466	ENSG00000196405	EVL	chr14	100510452	100510855
chr14|100708885|100709179	4.211	2.50526	2.4225	2.65385	0.666074	-0.0831267	-0.131595	0.00687646	0.0932294	1	1	0	0	Intron (uc001ygy.2/7528, intron 1 of 4)	7528	ENSG00000100811	YY1	chr14	100708885	100709179
chr14|100847215|100848641	5.11997	4.0767	6.02728	5.07355	0.0131394	-0.315594	0.248511	0.00488562	0.0840582	9	8	3	0	Promoter (<=1kb)	79446	ENSG00000176473	WDR25	chr14	100847215	100848641
chr14|100910109|100910644	4.34318	2.67893	3.81407	3.39823	0.353967	-0.343127	0.166547	0.00764152	0.0963775	2	4	2	0	Intron (uc010avx.3/79446, intron 2 of 6)	79446	ENSG00000176473	WDR25	chr14	100910109	100910644
chr14|101060304|101061262	2.086	2.3459	1.50153	1.51486	0.461559	0.630963	-0.0127432	0.00398966	0.0789658	1	9	1	1	Distal Intergenic	57596	ENSG00000183092	BEGAIN	chr14	101060304	101061262
chr14|101208733|101209411	2.32162	1.82489	1.39343	1.66369	0.480745	0.133427	-0.255747	0.00464505	0.0827781	1	9	1	0	Distal Intergenic	8788	ENSG00000185559	DLK1	chr14	101208733	101209411
chr14|101272613|101273018	3.76551	2.3016	1.79425	1.73637	1.11677	0.406568	0.0473085	0.00578794	0.0884983	1	8	1	1	Distal Intergenic	100616495	ENSG00000266461	MIR2392	chr14	101272613	101273018
chr14|101505924|101506390	3.54524	1.95603	2.97907	2.63485	0.42816	-0.429796	0.17714	0.00465563	0.0829058	4	6	2	0	Promoter (<=1kb)	442913	ENSG00000283279	MIR376C	chr14	101505924	101506390
chr14|102343803|102344227	4.57783	2.95505	4.06237	3.28458	0.478954	-0.152529	0.306612	0.00280082	0.0716802	4	4	2	0	Intron (uc001ykk.3/5527, intron 4 of 14)	5527	ENSG00000078304	PPP2R5C	chr14	102343803	102344227
chr14|102357552|102357890	6.63755	3.0743	6.03731	5.47567	0.277616	-0.832779	0.14087	0.00391401	0.0784425	1	4	1	0	Intron (uc001ykk.3/5527, intron 8 of 14)	5527	ENSG00000078304	PPP2R5C	chr14	102357552	102357890
chr14|102434989|102435449	4.1363	1.79125	2.50099	2.33212	0.826698	-0.380671	0.100861	0.00170984	0.0642197	4	11	2	0	Intron (uc001yks.2/1778, intron 1 of 77)	1778	ENSG00000197102	DYNC1H1	chr14	102434989	102435449
chr14|102461461|102461806	6.64312	4.11433	8.19662	5.30086	0.325634	-0.36557	0.628801	0.00706272	0.0939504	2	3	1	0	Exon (uc001yks.2/1778, exon 15 of 78)	1778	ENSG00000197102	DYNC1H1	chr14	102461461	102461806
chr14|102499944|102500321	5.3102	2.79349	6.00909	3.94452	0.428917	-0.49778	0.607295	0.00234194	0.068634	7	7	1	0	Exon (uc001yks.2/1778, exon 55 of 78)	1778	ENSG00000197102	DYNC1H1	chr14	102499944	102500321
chr14|102521064|102521877	3.14094	2.50381	1.96793	1.56048	1.0092	0.682131	0.334686	0.000713303	0.0606188	0	6	0	1	Distal Intergenic	3320	ENSG00000080824	HSP90AA1	chr14	102521064	102521877
chr14|102728030|102728645	3.64302	1.99118	2.67605	2.43513	0.581135	-0.290377	0.136108	0.00755214	0.0959904	2	7	2	0	Intron (uc001ylm.4/5891, intron 4 of 11)	5891	ENSG00000080823	MOK	chr14	102728030	102728645
chr14|103468038|103468917	2.20023	2.12884	1.45172	1.35865	0.695486	0.647894	0.0955959	0.00457374	0.0823515	0	3	1	0	Intron (uc001ymi.1/9578, intron 4 of 36)	9578	ENSG00000198752	CDC42BPB	chr14	103468038	103468917
chr14|103553798|103554567	3.30557	3.29669	2.47936	1.99422	0.729075	0.725197	0.314142	0.00246067	0.069328	5	8	0	3	Distal Intergenic	91828	ENSG00000205436	EXOC3L4	chr14	103553798	103554567
chr14|103980719|103981269	3.60683	2.1674	3.19378	3.01655	0.257832	-0.476934	0.0823679	0.00625207	0.0907198	3	6	1	0	Distal Intergenic	1152	ENSG00000166165	CKB	chr14	103980719	103981269
chr14|104626666|104627616	3.55474	3.95006	2.54452	2.51721	0.497916	0.650046	0.0155635	0.00514319	0.0853475	0	10	0	1	Intron (uc001yos.4/26153, intron 4 of 14)	26153	ENSG00000066735	KIF26A	chr14	104626666	104627616
chr14|104823665|104824169	3.87258	3.28153	2.1192	2.78642	0.474881	0.235953	-0.394891	0.00330158	0.0747097	0	5	0	1	Distal Intergenic	26153	ENSG00000066735	KIF26A	chr14	104823665	104824169
chr14|105423570|105424509	2.64777	1.95515	2.01726	1.89392	0.483401	0.0459	0.0910217	0.00436027	0.081178	3	8	2	0	5' UTR	113146	ENSG00000185567	AHNAK2	chr14	105423570	105424509
chr14|105522468|105522829	5.0583	6.95248	8.37991	8.55461	-0.758048	-0.299174	-0.0297663	0.00850974	0.099697	3	2	0	0	Promoter (<=1kb)	29933	ENSG00000183484	GPR132	chr14	105522468	105522829
chr14|106018524|106019089	6.10975	2.84784	3.89511	3.63198	0.750357	-0.350892	0.100905	0.00775997	0.0968429	8	7	1	0	Intron (uc031qqx.1/uc031qqx.1, intron 4910 of 4910)	80757	ENSG00000184986	TMEM121	chr14	106018524	106019089
chr14|106243284|106243789	3.22784	3.11602	2.06476	1.75227	0.881341	0.830476	0.236747	0.00107449	0.060705	0	6	0	1	Intron (uc031qqx.1/uc031qqx.1, intron 4866 of 4910)	2003	#N/A	ELK2AP	chr14	106243284	106243789
chr14|106476638|106477066	3.84321	5.55611	6.5756	7.31544	-0.928632	-0.39687	-0.153822	0.000401472	0.0606188	0	5	1	3	Exon (uc031qqx.1/uc031qqx.1, exon 2840 of 5065)	8755	ENSG00000271968	ADAM6	chr14	106476638	106477066
chr14|107142118|107142431	6.02524	8.35036	7.76574	9.49016	-0.655412	-0.184594	-0.289308	0.0076519	0.0963775	1	4	0	1	Intron (uc031qqx.1/uc031qqx.1, intron 71 of 4910)	338005	ENSG00000270816	LINC00221	chr14	107142118	107142431
chr14|107247378|107247815	5.10925	4.02249	6.23363	5.63247	-0.140654	-0.485679	0.146305	0.00758983	0.096159	1	3	1	0	Intron (uc031qqx.1/uc031qqx.1, intron 8 of 4910)	338005	ENSG00000270816	LINC00221	chr14	107247378	107247815
chr1|4186434|4188022	3.59345	3.78957	2.62856	3.11097	0.208004	0.284668	-0.24309	0.00484359	0.0839138	4	12	3	2	Distal Intergenic	728716	#N/A	LINC01346	chr1	4186434	4188022
chr14|20438009|20439154	1.96972	2.92825	2.76245	3.14596	-0.67551	-0.103462	-0.187552	0.00450146	0.0819668	0	2	1	2	Distal Intergenic	81127	ENSG00000169488	OR4K15	chr14	20438009	20439154
chr14|22943637|22944627	5.8538	7.02022	9.4047	10.7004	-0.870219	-0.608077	-0.186212	0.000915652	0.0606188	10	9	3	4	Intron (uc001wbw.2/uc001wbw.2, intron 2 of 5)	1603	ENSG00000129562	DAD1	chr14	22943637	22944627
chr14|22975246|22975664	4.19952	4.04288	2.39159	3.129	0.424523	0.369682	-0.387729	0.00296552	0.0727415	1	7	2	2	5' UTR	1603	ENSG00000129562	DAD1	chr14	22975246	22975664
chr1|42305484|42305834	4.77411	3.33608	5.53549	4.0166	0.249257	-0.26782	0.462738	0.00722118	0.094682	3	2	1	0	Intron (uc001cgz.4/59269, intron 1 of 8)	59269	ENSG00000127124	HIVEP3	chr1	42305484	42305834
chr14|23271033|23271538	4.00276	3.20634	2.93809	2.58094	0.633098	0.313031	0.186982	0.000809517	0.0606188	5	8	2	3	Intron (uc001wgr.4/9056, intron 2 of 9)	9056	ENSG00000155465	SLC7A7	chr14	23271033	23271538
chr14|23365755|23366123	4.93138	3.17335	5.84745	5.5749	-0.176955	-0.812938	0.0688616	0.00855214	0.0998679	6	5	1	0	Distal Intergenic	161253	ENSG00000139890	REM2	chr14	23365755	23366123
chr1|4234437|4235344	3.83421	4.30469	2.1426	2.00941	0.932158	1.09914	0.0925892	3.00623e-05	0.0606188	2	8	1	3	Distal Intergenic	728716	#N/A	LINC01346	chr1	4234437	4235344
chr14|23547046|23547340	4.14343	2.64771	4.56195	5.09661	-0.298711	-0.944794	-0.159887	0.00809332	0.0981324	1	3	0	0	Promoter (2-3kb)	22985	ENSG00000100813	ACIN1	chr14	23547046	23547340
chr14|25147888|25148204	5.73163	6.53527	7.83229	8.88876	-0.633037	-0.443737	-0.18255	0.00783404	0.0971256	0	4	1	1	Distal Intergenic	3002	ENSG00000100453	GZMB	chr14	25147888	25148204
chr14|26118981|26119294	6.05359	7.99818	8.96932	10.0023	-0.724463	-0.322582	-0.157255	0.00447082	0.0818652	0	4	0	1	Distal Intergenic	29091	ENSG00000168952	STXBP6	chr14	26118981	26119294
chr14|26604191|26604503	6.37909	4.60325	9.21186	8.29336	-0.378607	-0.849303	0.151537	0.00194162	0.0655113	0	4	0	0	Distal Intergenic	4857	ENSG00000139910	NOVA1	chr14	26604191	26604503
chr1|42765793|42766306	4.73134	2.04367	3.87453	3.04018	0.638093	-0.57299	0.349865	0.0070149	0.0937297	3	6	2	0	Intron (uc001che.3/22887, intron 4 of 14)	22887	ENSG00000198815	FOXJ3	chr1	42765793	42766306
chr14|27731244|27731614	6.76195	2.39604	5.16895	4.70599	0.522941	-0.973845	0.135373	0.00526618	0.085821	5	7	1	0	Distal Intergenic	100505967	ENSG00000258548	LINC00645	chr14	27731244	27731614
chr14|30145852|30146318	3.47424	1.93871	2.07065	1.94164	0.839425	-0.00217515	0.0928134	0.00453642	0.0820866	0	5	1	0	Intron (uc021rrv.1/100616347, intron 1 of 1)	100616347	ENSG00000265226	MIR548AI	chr14	30145852	30146318
chr14|31336605|31336922	5.07472	2.99502	7.08113	6.20942	-0.291131	-1.05189	0.189522	0.00193362	0.065482	1	3	1	0	Distal Intergenic	1690	ENSG00000100473	COCH	chr14	31336605	31336922
chr14|31694792|31696331	1.67006	2.41149	2.50474	2.68202	-0.683418	-0.153395	-0.0986608	0.00532151	0.0861519	2	3	2	0	Distal Intergenic	25831	ENSG00000092148	HECTD1	chr14	31694792	31696331
chr14|31733930|31734746	2.98658	2.56933	1.81348	2.15442	0.47119	0.254092	-0.248541	0.00381884	0.0779466	3	6	1	0	Distal Intergenic	25831	ENSG00000092148	HECTD1	chr14	31733930	31734746
chr1|43184119|43185698	3.4088	2.31788	3.01052	2.88607	0.240159	-0.3163	0.0609063	0.00761046	0.0962265	10	7	2	0	Distal Intergenic	149461	ENSG00000164007	CLDN19	chr1	43184119	43185698
chr14|32043561|32043891	4.42505	3.99108	6.36319	5.72154	-0.370709	-0.519625	0.153347	0.00613966	0.090095	2	3	1	0	Intron (uc001wrk.4/80224, intron 3 of 10)	80224	ENSG00000151413	NUBPL	chr14	32043561	32043891
chr14|32621253|32621636	4.8793	3.31965	6.02998	5.58067	-0.193763	-0.749406	0.111715	0.00165044	0.0637323	8	5	1	0	Exon (uc001wrl.3/394, exon 6 of 7)	394	ENSG00000100852	ARHGAP5	chr14	32621253	32621636
chr14|32843542|32843819	4.44914	5.5712	7.12081	6.25668	-0.491872	-0.167411	0.186643	0.00464505	0.0827781	1	2	0	1	Intron (uc010aml.3/9472, intron 1 of 9)	9472	ENSG00000151320	AKAP6	chr14	32843542	32843819
chr14|33748398|33748763	5.52986	3.45789	6.14303	6.18824	-0.162286	-0.839637	-0.0105787	0.00456958	0.0823037	5	3	1	0	Intron (uc001wrs.3/64067, intron 3 of 11)	64067	ENSG00000151322	NPAS3	chr14	33748398	33748763
chr14|34641836|34642348	3.42755	5.01999	5.44396	6.75495	-0.978767	-0.428259	-0.311288	0.00831585	0.0990879	7	9	0	5	Distal Intergenic	112399	ENSG00000129521	EGLN3	chr14	34641836	34642348
chr1|43469753|43470125	3.47023	1.92842	3.24767	2.03528	0.769807	-0.0778035	0.67418	0.00123594	0.0612161	3	5	0	0	Distal Intergenic	6513	ENSG00000117394	SLC2A1	chr1	43469753	43470125
chr14|34700714|34701007	5.97251	7.91796	9.35891	9.75275	-0.707472	-0.30068	-0.0594678	0.00852898	0.0997758	1	1	0	1	Distal Intergenic	171546	ENSG00000165389	SPTSSA	chr14	34700714	34701007
chr14|35162591|35162872	6.1076	7.27796	8.04794	8.54896	-0.485144	-0.232215	-0.0871297	0.00435432	0.0810857	1	2	0	1	Distal Intergenic	1073	ENSG00000165410	CFL2	chr14	35162591	35162872
chr1|43541758|43541996	5.21441	3.79416	7.15517	6.24943	-0.26122	-0.719944	0.195262	0.0059802	0.0894132	0	2	0	0	Distal Intergenic	440585	ENSG00000186973	FAM183A	chr1	43541758	43541996
chr1|43683053|43683995	4.0281	2.53658	4.07294	3.42887	0.232366	-0.434852	0.248335	0.0040575	0.0794424	5	4	2	0	Intron (uc021omk.1/149465, intron 12 of 23)	10969	ENSG00000117395	EBNA1BP2	chr1	43683053	43683995
chr1|43886627|43887141	5.83434	4.33501	7.47368	5.21537	0.1618	-0.266733	0.51905	0.00367029	0.0770802	3	5	1	0	Exon (uc009vws.1/23334, exon 10 of 22)	23334	ENSG00000198198	SZT2	chr1	43886627	43887141
chr14|39646664|39647051	4.80178	2.22247	4.5984	3.17831	0.595308	-0.516096	0.532872	0.00357772	0.0764574	7	7	1	0	Promoter (2-3kb)	5411	ENSG00000100941	PNN	chr14	39646664	39647051
chr14|39690719|39691055	5.22925	2.85317	5.85486	4.20339	0.315052	-0.558989	0.478081	0.00829332	0.0990145	2	4	1	0	Distal Intergenic	117153	#N/A	#N/A	chr14	39690719	39691055
chr14|41462896|41463315	5.02334	1.88934	2.9613	2.99821	0.744543	-0.666218	-0.0178717	0.00724411	0.0948239	4	7	2	0	Distal Intergenic	145581	ENSG00000165379	LRFN5	chr14	41462896	41463315
chr14|41870275|41870490	4.14416	1.63402	2.0292	3.58473	0.209215	-1.13344	-0.820953	0.00819642	0.0986541	0	2	0	0	Distal Intergenic	145581	ENSG00000165379	LRFN5	chr14	41870275	41870490
chr14|42807991|42808269	5.97819	7.25107	8.70354	10.2148	-0.772886	-0.494403	-0.230994	0.00317298	0.0739441	0	2	0	1	Distal Intergenic	145581	ENSG00000165379	LRFN5	chr14	42807991	42808269
chr14|43210707|43211556	2.83989	3.36656	3.48698	3.89235	-0.454805	-0.209369	-0.158662	0.00785533	0.0972677	1	2	0	1	Distal Intergenic	145581	ENSG00000165379	LRFN5	chr14	43210707	43211556
chr14|43308070|43309052	2.19176	2.76522	3.07172	3.40247	-0.634493	-0.299191	-0.147538	0.00123594	0.0612161	1	3	0	2	Distal Intergenic	145581	ENSG00000165379	LRFN5	chr14	43308070	43309052
chr1|4437292|4437580	3.36916	4.16313	1.83874	1.83275	0.878382	1.18366	0.00470603	0.00354038	0.0762426	0	2	0	1	Distal Intergenic	284661	ENSG00000235054	LINC01777	chr1	4437292	4437580
chr14|45048348|45048655	6.2151	8.79226	8.60439	10.4014	-0.742928	-0.242471	-0.273632	0.00515724	0.0853475	0	2	0	1	Distal Intergenic	84075	ENSG00000189139	FSCB	chr14	45048348	45048655
chr14|46707078|46707404	2.56998	1.96708	3.21805	3.76138	-0.549506	-0.935208	-0.225073	0.00215262	0.0670902	1	3	1	0	Intron (uc031qoi.1/100506412, intron 3 of 5)	100506412	ENSG00000258700	LINC00871	chr14	46707078	46707404
chr14|47409548|47410763	3.33454	5.08338	4.9124	5.9699	-0.840217	-0.231919	-0.281278	0.00427962	0.0807344	11	9	0	5	Intron (uc001wwi.4/161357, intron 9 of 16)	161357	ENSG00000139915	MDGA2	chr14	47409548	47410763
chr1|44749666|44749904	3.71325	1.73012	2.3146	2.30886	0.685501	-0.416309	0.00357988	0.0070149	0.0937297	0	2	0	0	Intron (uc010okv.2/79033, intron 5 of 6)	79033	ENSG00000117419	ERI3	chr1	44749666	44749904
chr14|48724930|48726536	1.8924	2.84798	2.42452	2.11941	-0.163442	0.426278	0.194038	0.00423309	0.0804746	6	2	1	2	Distal Intergenic	100506433	ENSG00000259129	LINC00648	chr14	48724930	48726536
chr14|50476066|50476752	4.26431	2.25823	3.04211	2.6123	0.706993	-0.210128	0.219753	0.000566614	0.0606188	8	11	2	0	Promoter (1-2kb)	283551	ENSG00000214900	LINC01588	chr14	50476066	50476752
chr14|50746976|50747329	6.15029	5.49309	8.04112	8.67604	-0.496382	-0.65942	-0.10964	0.00730008	0.0949922	0	2	0	1	Intron (uc010tqn.2/79944, intron 5 of 9)	79944	ENSG00000087299	L2HGDH	chr14	50746976	50747329
chr14|51085861|51086190	3.95395	3.14143	5.25254	6.2901	-0.669789	-1.00166	-0.260067	0.00109649	0.0608256	1	1	1	0	Intron (uc001wyd.4/51062, intron 9 of 13)	60485	ENSG00000151748	SAV1	chr14	51085861	51086190
chr14|51368551|51369011	3.94561	2.11853	4.09423	3.29436	0.260253	-0.636931	0.313595	0.00825592	0.0988243	8	9	2	0	Exon (uc001wyq.3/145447, exon 9 of 12)	5836	ENSG00000100504	PYGL	chr14	51368551	51369011
chr14|51448468|51449074	5.04253	5.02917	7.23788	5.36629	-0.089778	-0.0936056	0.431642	0.0032021	0.0740943	4	4	1	1	Exon (uc001wyx.4/114088, exon 8 of 10)	5836	ENSG00000100504	PYGL	chr14	51448468	51449074
chr14|51632584|51632902	5.41504	4.15962	7.51575	7.27306	-0.42559	-0.806111	0.0473545	0.00395706	0.0787331	0	2	1	0	Distal Intergenic	114088	ENSG00000100505	TRIM9	chr14	51632584	51632902
chr14|51733606|51734060	3.20548	1.89788	2.37614	3.44534	-0.104104	-0.860258	-0.536024	0.00724739	0.0948239	1	7	2	0	Distal Intergenic	81542	ENSG00000139921	TMX1	chr14	51733606	51734060
chr14|51802008|51802370	6.37471	8.64833	9.29232	10.4856	-0.71798	-0.277918	-0.174299	0.00439815	0.0813642	2	2	1	1	Promoter (1-2kb)	283553	ENSG00000258479	LINC00640	chr14	51802008	51802370
chr14|51926091|51926470	4.6657	3.02138	5.68713	5.12821	-0.136362	-0.763248	0.149247	0.00795184	0.0976126	0	2	1	0	Intron (uc031qon.1/100874185, intron 2 of 2)	122786	ENSG00000139926	FRMD6	chr14	51926091	51926470
chr14|52485745|52486812	4.32914	3.26235	5.61093	4.33463	-0.00183027	-0.409999	0.372332	0.00275887	0.0714459	8	10	2	0	Exon (uc001wzo.3/22795, exon 13 of 22)	51637	ENSG00000087302	RTRAF	chr14	52485745	52486812
chr14|53524848|53525231	4.8205	2.12177	4.51591	4.48382	0.104455	-1.07946	0.0102887	0.00595312	0.0892726	5	7	1	0	Promoter (2-3kb)	80821	ENSG00000100523	DDHD1	chr14	53524848	53525231
chr14|54815852|54816355	3.00383	4.23942	4.51304	5.4571	-0.86133	-0.364267	-0.274034	0.00149932	0.0629058	7	8	0	3	Distal Intergenic	1033	ENSG00000100526	CDKN3	chr14	54815852	54816355
chr14|57440761|57441130	5.08851	2.72155	5.35579	4.31767	0.236989	-0.665823	0.310845	0.00729677	0.0949922	5	4	1	0	Distal Intergenic	100309464	ENSG00000248550	OTX2-AS1	chr14	57440761	57441130
chr14|57535289|57535570	6.07335	9.09204	7.77021	10.4089	-0.777248	-0.195136	-0.421786	0.00470461	0.0831187	1	3	0	0	Distal Intergenic	10640	ENSG00000070367	EXOC5	chr14	57535289	57535570
chr14|59311498|59312439	2.64136	2.67943	3.06455	3.79309	-0.522091	-0.501448	-0.307695	0.00345105	0.0756601	0	3	1	0	Distal Intergenic	51339	ENSG00000165617	DACT1	chr14	59311498	59312439
chr14|59892360|59892793	4.28684	3.77263	5.18901	5.73833	-0.420716	-0.605059	-0.14517	0.00329405	0.0746573	0	6	2	0	Distal Intergenic	64582	ENSG00000181619	GPR135	chr14	59892360	59892793
chr14|60184126|60184706	1.87091	2.62173	2.78385	3.27794	-0.80905	-0.32227	-0.235705	0.00316719	0.0738935	7	4	1	1	Intron (uc001xem.1/6252, intron 1 of 6)	6252	ENSG00000139970	RTN1	chr14	60184126	60184706
chr14|61977357|61977898	4.57915	2.36508	3.45401	3.74556	0.289899	-0.663292	-0.116909	0.00193895	0.065482	2	6	2	0	Intron (uc010tsa.2/5583, intron 9 of 12)	5583	ENSG00000027075	PRKCH	chr14	61977357	61977898
chr1|46291640|46291883	4.70179	2.20064	4.00193	2.65809	0.82282	-0.272467	0.590307	0.00855987	0.099869	0	2	0	0	Intron (uc001cov.3/23139, intron 2 of 28)	23139	ENSG00000086015	MAST2	chr1	46291640	46291883
chr14|63894915|63895302	4.07949	2.27855	3.68715	4.44282	-0.123087	-0.963363	-0.26897	0.00781988	0.0970936	8	5	1	0	Intron (uc010tsf.1/5529, intron 2 of 12)	5529	ENSG00000154001	PPP2R5E	chr14	63894915	63895302
chr1|46574754|46575318	5.19449	2.6403	4.22208	4.09147	0.344363	-0.63192	0.0453343	0.00705313	0.0939504	4	6	1	0	Intron (uc001cpb.4/8503, intron 1 of 9)	8503	ENSG00000117461	PIK3R3	chr1	46574754	46575318
chr14|66544958|66545258	4.5677	5.65358	7.07243	7.69577	-0.752599	-0.444901	-0.12186	0.000219345	0.0606188	1	2	0	1	Distal Intergenic	440184	ENSG00000196553	CCDC196	chr14	66544958	66545258
chr14|68311869|68312194	6.6182	2.86718	6.71107	6.01562	0.137725	-1.06908	0.157828	0.00737648	0.0953051	1	1	1	0	Intron (uc010aqq.3/5890, intron 4 of 6)	5890	ENSG00000182185	RAD51B	chr14	68311869	68312194
chr14|69013881|69015417	2.60246	4.1642	4.26135	4.53847	-0.802331	-0.124165	-0.0908954	0.000760249	0.0606188	5	6	1	4	Intron (uc001xkf.2/5890, intron 10 of 10)	677	ENSG00000185650	ZFP36L1	chr14	69013881	69015417
chr14|69501869|69502265	5.63779	2.30337	3.48244	3.67325	0.618073	-0.673312	-0.0769595	0.00633771	0.0909591	7	7	1	0	Distal Intergenic	161159	ENSG00000259062	ACTN1-AS1	chr14	69501869	69502265
chr14|69692953|69693390	4.54781	3.93196	5.75552	6.32402	-0.475671	-0.685596	-0.135896	0.00651249	0.091617	4	9	3	2	Intron (uc001xkt.3/55218, intron 4 of 10)	57452	ENSG00000100626	GALNT16	chr14	69692953	69693390
chr14|70582882|70583313	2.57694	2.92174	4.19488	5.04395	-0.968897	-0.787728	-0.265926	0.00245616	0.0693088	6	2	2	1	Intron (uc001xlw.3/6547, intron 2 of 7)	6547	ENSG00000100678	SLC8A3	chr14	70582882	70583313
chr14|70936193|70936502	6.26107	4.71928	7.86865	7.80015	-0.317093	-0.724936	0.0126146	0.00633484	0.0909591	0	4	0	0	3' UTR	317760	ENSG00000259158	ADAM20P1	chr14	70936193	70936502
chr14|71176741|71177156	3.44492	2.65103	4.16	4.825	-0.486061	-0.863977	-0.213947	0.00821126	0.0986837	2	1	2	0	Distal Intergenic	23508	ENSG00000133985	TTC9	chr14	71176741	71177156
chr14|71637012|71637624	3.64361	2.22417	2.84808	3.03941	0.261577	-0.450523	-0.0937996	0.00646542	0.0914902	5	9	1	0	Distal Intergenic	22990	ENSG00000100731	PCNX1	chr14	71637012	71637624
chr14|71645131|71645609	6.01756	6.63196	7.49625	9.32185	-0.631437	-0.491181	-0.314447	0.00816683	0.0984975	1	3	0	0	Distal Intergenic	22990	ENSG00000100731	PCNX1	chr14	71645131	71645609
chr14|73441745|73442127	5.32192	2.51132	5.05528	4.561	0.222596	-0.860903	0.14844	0.00837999	0.0993068	5	7	1	0	Intron (uc001xnl.3/53349, intron 6 of 8)	53349	ENSG00000165861	ZFYVE1	chr14	73441745	73442127
chr14|73600705|73600996	4.9973	2.1132	4.2304	3.08684	0.695019	-0.546698	0.454666	0.00610079	0.0899203	1	3	0	0	Promoter (2-3kb)	5663	ENSG00000080815	PSEN1	chr14	73600705	73600996
chr14|73700831|73701525	4.9683	3.13727	4.22998	3.04642	0.70564	0.0423946	0.473536	0.00706592	0.0939504	4	6	2	0	Promoter (2-3kb)	89932	ENSG00000100767	PAPLN	chr14	73700831	73701525
chr14|73708271|73708742	3.94375	1.73764	1.88759	2.0823	0.921391	-0.26105	-0.141632	0.00319334	0.0740797	4	7	0	0	Promoter (1-2kb)	89932	ENSG00000100767	PAPLN	chr14	73708271	73708742
chr14|73736934|73737829	2.61297	2.52058	2.10282	1.94749	0.424076	0.372141	0.110711	0.00574605	0.0881672	1	6	0	0	Intron (uc001xnw.4/89932, intron 25 of 25)	89932	ENSG00000100767	PAPLN	chr14	73736934	73737829
chr14|73747561|73748085	4.63452	2.75666	4.42892	3.40512	0.444714	-0.304783	0.379248	0.00328504	0.0746573	7	5	1	0	Intron (uc010ttz.1/8650, intron 2 of 2)	8650	ENSG00000133961	NUMB	chr14	73747561	73748085
chr14|74102994|74103478	3.46666	1.9473	2.93946	2.2332	0.634433	-0.197636	0.396436	0.00590469	0.0889394	3	7	1	0	Distal Intergenic	83544	ENSG00000119661	DNAL1	chr14	74102994	74103478
chr14|74834320|74835030	4.81527	3.41349	5.88408	4.76093	0.0163728	-0.479995	0.305573	0.0076727	0.0964425	4	4	3	0	Distal Intergenic	55237	ENSG00000133980	VRTN	chr14	74834320	74835030
chr14|75402725|75403144	4.39531	2.02993	3.51644	3.07135	0.517093	-0.597446	0.195242	0.00445457	0.0817784	1	4	1	0	Distal Intergenic	83694	ENSG00000198208	RPS6KL1	chr14	75402725	75403144
chr14|75829503|75829957	5.23942	2.27789	3.66075	3.2524	0.687902	-0.513806	0.170632	0.00142605	0.062351	1	5	1	0	Distal Intergenic	122953	ENSG00000140044	JDP2	chr14	75829503	75829957
chr14|75896837|75897343	1.93998	2.44939	3.33584	3.62893	-0.903499	-0.567122	-0.121492	0.00233124	0.0685602	2	1	1	1	Promoter (1-2kb)	122953	ENSG00000140044	JDP2	chr14	75896837	75897343
chr14|76102475|76102811	7.17188	7.5238	10.3473	8.24828	-0.201741	-0.132632	0.327084	0.00332731	0.0747782	0	3	1	1	Intron (uc001xrs.2/55640, intron 5 of 9)	11161	ENSG00000133935	ERG28	chr14	76102475	76102811
chr14|76334025|76335433	3.62874	4.29317	5.63898	5.82883	-0.683739	-0.441164	-0.0477732	0.0033046	0.0747097	9	8	2	3	Intron (uc010ask.2/23093, intron 30 of 31)	23093	ENSG00000119685	TTLL5	chr14	76334025	76335433
chr14|76461913|76462644	1.51354	1.92583	2.96514	2.7094	-0.840043	-0.492492	0.130126	4.52273e-05	0.0606188	5	2	1	0	Intron (uc001xse.3/112752, intron 2 of 3)	112752	ENSG00000119650	IFT43	chr14	76461913	76462644
chr14|76720425|76720790	5.76461	2.38745	5.30994	4.61857	0.319778	-0.951978	0.201251	0.00436424	0.081192	2	4	1	0	Distal Intergenic	100873740	#N/A	RNU6-31P	chr14	76720425	76720790
chr1|4768323|4768763	3.50763	2.64593	1.7598	2.17858	0.68711	0.28039	-0.307973	0.00265974	0.0707141	3	8	0	1	Intron (uc001alm.1/55966, intron 1 of 5)	55966	ENSG00000196581	AJAP1	chr1	4768323	4768763
chr14|77181182|77181978	4.14132	5.49267	5.72271	7.34125	-0.825936	-0.418519	-0.359327	0.00123367	0.0612161	1	3	3	0	Distal Intergenic	22846	ENSG00000071246	VASH1	chr14	77181182	77181978
chr1|47730823|47731311	3.85942	1.83937	2.94405	2.96282	0.381411	-0.687763	-0.00916749	0.00497304	0.0845013	2	4	2	0	Intron (uc001crb.1/6491, intron 1 of 1)	6491	ENSG00000123473	STIL	chr1	47730823	47731311
chr14|77454933|77455323	4.46701	2.55082	3.31197	2.56307	0.801437	-0.00691152	0.369815	0.00348906	0.075993	4	5	1	0	Distal Intergenic	64207	ENSG00000119669	IRF2BPL	chr14	77454933	77455323
chr14|77480830|77481491	2.88192	1.96516	2.10882	2.03307	0.503376	-0.049007	0.0527806	0.00565289	0.087777	8	7	2	0	Distal Intergenic	64207	ENSG00000119669	IRF2BPL	chr14	77480830	77481491
chr1|4778835|4779037	3.26973	2.53773	1.45056	2.16796	0.592835	0.227204	-0.57973	0.00458624	0.0824494	0	2	0	0	Intron (uc001alm.1/55966, intron 2 of 5)	55966	ENSG00000196581	AJAP1	chr1	4778835	4779037
chr14|78582223|78583030	2.4453	1.88795	1.47789	1.70594	0.519443	0.14625	-0.207033	0.00490343	0.0841829	1	10	1	0	Distal Intergenic	9369	ENSG00000021645	NRXN3	chr14	78582223	78583030
chr14|79814809|79815877	2.14412	1.83618	1.45187	2.01406	0.0902768	-0.133402	-0.472193	0.00675296	0.0927439	0	5	1	0	Intron (uc001xum.2/9369, intron 14 of 20)	9369	ENSG00000021645	NRXN3	chr14	79814809	79815877
chr14|80118767|80119171	2.01204	1.57988	0.967008	1.07466	0.904777	0.555939	-0.15228	0.00395346	0.0787331	0	4	0	0	Intron (uc001xum.2/9369, intron 15 of 20)	9369	ENSG00000021645	NRXN3	chr14	80118767	80119171
chr14|80866102|80866452	4.63365	2.6396	5.45046	5.35452	-0.208609	-1.02044	0.0256199	0.00532393	0.0861519	4	1	1	0	Intron (uc001xuw.1/100628307, intron 7 of 8)	1734	ENSG00000211448	DIO2	chr14	80866102	80866452
chr14|81366280|81368000	3.81169	2.48737	4.43984	3.74176	0.0267134	-0.589097	0.24679	0.00835729	0.0992504	9	8	2	0	3' UTR	145508	ENSG00000100629	CEP128	chr14	81366280	81368000
chr14|84720663|84721018	4.33132	5.0573	9.49969	11.3104	-1.38477	-1.16121	-0.251701	0.000153429	0.0606188	4	3	1	1	Distal Intergenic	100996280	ENSG00000259107	LINC00911	chr14	84720663	84721018
chr14|87241956|87242460	3.75117	2.08511	1.87835	2.05797	0.866119	0.0189019	-0.131756	0.00523041	0.0856265	3	10	2	1	Distal Intergenic	283585	ENSG00000258804	LINC01148	chr14	87241956	87242460
chr14|88157509|88158309	3.00979	3.16876	2.13284	2.36119	0.35015	0.424404	-0.146739	0.00851743	0.0997585	2	10	2	1	Distal Intergenic	2581	ENSG00000054983	GALC	chr14	88157509	88158309
chr7|157527504|157527863	4.0997	3.17883	1.77529	1.51795	1.43339	1.06637	0.225924	0.00593155	0.0891672	0	3	0	1	Intron (uc011kwa.2/5799, intron 12 of 22)	100506585	ENSG00000233038	LOC100506585	chr7	157527504	157527863
chr1|48953244|48953601	6.46816	3.35316	6.69645	7.21793	-0.158229	-1.10606	-0.108188	0.00600195	0.089505	6	3	1	0	Distal Intergenic	54558	ENSG00000132122	SPATA6	chr1	48953244	48953601
chr14|89628830|89629391	3.53135	2.65558	4.53972	2.60412	0.439424	0.0282329	0.801808	0.00508739	0.0850037	2	5	1	0	Exon (uc001xxn.4/1112, exon 6 of 6)	1112	ENSG00000053254	FOXN3	chr14	89628830	89629391
chr14|89763758|89764187	3.544	2.06403	3.57868	2.92733	0.275795	-0.504117	0.289844	0.00573562	0.0881672	9	6	2	0	Intron (uc001xxn.4/1112, intron 3 of 5)	1112	ENSG00000053254	FOXN3	chr14	89763758	89764187
chr14|89784796|89785131	6.03599	2.54885	4.62735	4.13981	0.544025	-0.699717	0.160622	0.00628619	0.0907839	1	4	1	0	Intron (uc001xxn.4/1112, intron 3 of 5)	1112	ENSG00000053254	FOXN3	chr14	89784796	89785131
chr14|90492334|90492979	4.56307	2.23526	4.12004	3.53006	0.370311	-0.659251	0.222967	0.00731993	0.0950455	4	4	2	0	Intron (uc010atm.3/55775, intron 16 of 17)	56659	ENSG00000152315	KCNK13	chr14	90492334	90492979
chr14|90988020|90988577	4.10184	2.80708	2.26259	2.62451	0.644225	0.0970232	-0.214075	0.0014379	0.0624307	0	9	0	1	Distal Intergenic	400238	ENSG00000233208	LINC00642	chr14	90988020	90988577
chr14|91081784|91082542	4.1285	4.24577	6.33125	7.56636	-0.873982	-0.833574	-0.25711	0.0018794	0.0651372	6	7	1	3	Intron (uc001xyo.3/145567, intron 2 of 6)	145567	ENSG00000165914	TTC7B	chr14	91081784	91082542
chr14|91118092|91118512	3.99265	1.8065	2.54336	2.82181	0.500724	-0.643422	-0.149885	0.00341346	0.075377	3	8	2	0	Intron (uc010ats.3/145567, intron 7 of 14)	145567	ENSG00000165914	TTC7B	chr14	91118092	91118512
chr14|91619391|91620343	3.83129	2.35732	2.62879	2.40365	0.672602	-0.0280816	0.129169	0.00597477	0.0893935	4	9	2	0	Intron (uc010atu.3/80017, intron 3 of 6)	100124539	ENSG00000221102	SNORA11B	chr14	91619391	91620343
chr14|91735307|91736112	3.48289	3.60407	5.01257	5.88475	-0.756699	-0.707354	-0.231432	0.00451171	0.0820256	3	8	2	3	Downstream (1-2kb)	440193	ENSG00000015133	CCDC88C	chr14	91735307	91736112
chr14|91764641|91765449	4.16871	4.19717	5.64859	5.63494	-0.434802	-0.424984	0.00349066	0.00245616	0.0693088	7	7	0	1	Intron (uc010aty.3/440193, intron 21 of 29)	440193	ENSG00000015133	CCDC88C	chr14	91764641	91765449
chr14|92420914|92421443	4.24504	2.14264	2.87502	2.44875	0.793732	-0.192661	0.231524	0.00162561	0.063485	2	4	2	0	Distal Intergenic	10516	ENSG00000140092	FBLN5	chr14	92420914	92421443
chr14|92656963|92657339	5.10033	2.69224	4.54584	4.90727	0.0556691	-0.866115	-0.110375	0.00554358	0.0873256	4	5	1	0	Distal Intergenic	53981	ENSG00000165934	CPSF2	chr14	92656963	92657339
chr14|93481563|93482182	4.1213	3.28233	2.65897	2.3034	0.839337	0.510957	0.207102	0.00402986	0.0792336	2	10	0	1	Intron (uc001ybe.2/3705, intron 4 of 10)	319085	ENSG00000258730	ITPK1-AS1	chr14	93481563	93482182
chr14|93498098|93498417	4.17932	1.95589	1.87923	2.03293	1.03971	-0.0557314	-0.113419	0.00280723	0.0716958	0	2	0	0	Intron (uc001ybe.2/3705, intron 3 of 10)	319085	ENSG00000258730	ITPK1-AS1	chr14	93498098	93498417
chr14|93708601|93709584	5.35549	5.19455	7.82871	7.24329	-0.435627	-0.479647	0.11213	0.00245616	0.0693088	6	8	3	0	3' UTR	55148	ENSG00000012963	UBR7	chr14	93708601	93709584
chr14|93925460|93926179	3.13981	1.93951	2.07021	2.4441	0.361377	-0.333613	-0.239524	0.0068021	0.0929266	5	10	1	0	Intron (uc001ybs.1/57578, intron 1 of 49)	57578	ENSG00000133958	UNC79	chr14	93925460	93926179
chr14|94179629|94179910	7.55054	11.4303	11.9418	11.7622	-0.639507	-0.0412917	0.0218634	0.00288794	0.0722026	1	1	0	1	Distal Intergenic	145270	ENSG00000175785	PRIMA1	chr14	94179629	94179910
chr14|94515409|94515759	4.65228	2.0482	3.58741	3.03927	0.614215	-0.56937	0.23922	0.00637807	0.0911102	3	2	1	0	Downstream (1-2kb)	78990	ENSG00000089723	OTUB2	chr14	94515409	94515759
chr14|95231988|95232267	4.59215	3.79165	3.16894	3.50965	0.387844	0.111497	-0.147325	0.00826713	0.098909	0	3	0	0	Downstream (2-3kb)	145258	ENSG00000133937	GSC	chr14	95231988	95232267
chr14|95669443|95669782	5.16288	3.51172	7.17539	5.08208	0.0227558	-0.533242	0.497638	0.000299451	0.0606188	2	1	1	0	Exon (uc001yef.2/79789, exon 9 of 13)	23405	ENSG00000100697	DICER1	chr14	95669443	95669782
chr14|95729867|95730668	4.07609	1.95123	3.11165	2.87013	0.506071	-0.556734	0.116565	0.00764498	0.0963775	4	6	2	0	Intron (uc001yef.2/79789, intron 1 of 12)	79789	ENSG00000165959	CLMN	chr14	95729867	95730668
chr14|95900233|95900587	4.97319	4.23632	6.92859	6.75599	-0.441995	-0.673355	0.0363949	0.00374128	0.0775448	5	4	1	0	Intron (uc001yei.4/161176, intron 14 of 16)	79686	#N/A	#N/A	chr14	95900233	95900587
chr14|95959796|95960162	6.89706	2.95737	4.57019	3.8946	0.824508	-0.39716	0.230781	0.00131819	0.0616985	4	4	1	0	Distal Intergenic	161176	ENSG00000176438	SYNE3	chr14	95959796	95960162
chr14|96308692|96309064	5.75042	2.25776	5.61731	4.06902	0.498985	-0.84979	0.465197	0.00474761	0.0832931	4	6	1	0	Distal Intergenic	100507043	ENSG00000250366	TUNAR	chr14	96308692	96309064
chr14|96564088|96565236	4.06889	5.07421	6.84726	6.24574	-0.618236	-0.29969	0.132655	0.00200221	0.0660475	13	9	4	5	Distal Intergenic	56967	ENSG00000227051	C14orf132	chr14	96564088	96565236
chr14|96971195|96972538	3.24103	2.44742	1.97447	2.07854	0.64088	0.235689	-0.0741053	0.00120894	0.0612045	6	10	1	2	Promoter (2-3kb)	10914	ENSG00000090060	PAPOLA	chr14	96971195	96972538
chr14|97617303|97617681	4.79311	2.07955	3.73228	3.55358	0.431688	-0.773001	0.070783	0.00360558	0.0766367	3	5	1	0	Distal Intergenic	7443	ENSG00000100749	VRK1	chr14	97617303	97617681
chr14|97924019|97925064	4.93884	5.4352	6.39166	7.54131	-0.610643	-0.472482	-0.238624	0.00557894	0.0874193	8	10	2	3	Distal Intergenic	100129345	ENSG00000197176	LINC02291	chr14	97924019	97925064
chr1|50376502|50376887	4.26985	1.9296	3.61625	4.33973	-0.0234198	-1.16931	-0.26311	0.00458833	0.0824733	4	5	1	0	Intron (uc001cru.2/84871, intron 1 of 13)	84871	ENSG00000186094	AGBL4	chr1	50376502	50376887
chr15|101320603|101321459	2.30094	2.21995	1.48609	1.47787	0.638707	0.587012	0.00800365	0.00368203	0.0771143	0	5	1	0	Distal Intergenic	220	ENSG00000184254	ALDH1A3	chr15	101320603	101321459
chr15|101534598|101535063	4.51069	2.42349	4.09574	3.08093	0.549985	-0.346281	0.41076	0.00423309	0.0804746	9	5	2	0	Intron (uc002bwr.3/79705, intron 6 of 33)	79705	ENSG00000154237	LRRK1	chr15	101534598	101535063
chr15|101611186|101611976	4.7785	2.10273	3.03063	2.41435	0.984926	-0.199366	0.327985	0.00565546	0.087777	4	3	1	0	Distal Intergenic	79705	ENSG00000154237	LRRK1	chr15	101611186	101611976
chr1|5148359|5149247	2.15114	3.01412	3.18116	2.92433	-0.443003	0.0436325	0.121445	0.0051878	0.0854599	1	2	0	0	Distal Intergenic	55966	ENSG00000196581	AJAP1	chr1	5148359	5149247
chr1|51717107|51717677	3.76367	2.39595	3.01893	3.35141	0.167371	-0.48417	-0.150731	0.00293049	0.0725899	7	5	1	0	Intron (uc001csi.4/26994, intron 1 of 2)	26994	ENSG00000123091	RNF11	chr1	51717107	51717677
chr1|51844563|51844886	6.961	4.61403	7.7587	6.03855	0.205093	-0.388174	0.361613	0.00630618	0.0908777	1	2	1	0	Intron (uc001csp.3/2060, intron 9 of 12)	22996	ENSG00000085831	TTC39A	chr1	51844563	51844886
chr15|22997617|22998255	4.79229	2.40376	4.13578	3.727	0.362702	-0.632719	0.150147	0.00483478	0.0838768	3	9	2	0	Exon (uc001yus.3/23191, exon 27 of 31)	23191	ENSG00000273749	CYFIP1	chr15	22997617	22998255
chr15|22999147|22999949	3.78994	4.11232	5.25977	3.92374	-0.0500537	0.0677255	0.422772	0.00416424	0.0800223	1	3	1	0	Exon (uc001yus.3/23191, exon 29 of 31)	23191	ENSG00000273749	CYFIP1	chr15	22999147	22999949
chr15|23003940|23004334	3.62394	1.90219	2.39726	2.39882	0.595233	-0.334669	-0.000941983	0.00613131	0.0900901	4	5	1	0	Downstream (<1kb)	81614	ENSG00000140157	NIPA2	chr15	23003940	23004334
chr15|23168500|23169830	1.82358	2.41401	2.19557	2.64234	-0.535047	-0.13039	-0.267224	0.00770749	0.0965715	7	8	2	0	Distal Intergenic	339005	#N/A	WHAMMP3	chr15	23168500	23169830
chr15|24975781|24976288	5.17216	6.44772	7.40444	6.87036	-0.40962	-0.0915976	0.108005	0.00751464	0.0958718	5	6	0	2	Distal Intergenic	23742	ENSG00000185823	NPAP1	chr15	24975781	24976288
chr15|25354508|25355258	4.52283	4.58399	5.94141	6.61241	-0.54795	-0.528572	-0.15437	0.0045946	0.0825225	4	6	4	1	Promoter (2-3kb)	100033821	ENSG00000207245	SNORD116-29	chr15	25354508	25355258
chr15|25427069|25427489	4.77003	2.70962	3.97375	2.91198	0.712001	-0.10391	0.448501	0.0011679	0.0610212	5	8	2	0	Promoter (<=1kb)	100033444	ENSG00000278089	SNORD115-7	chr15	25427069	25427489
chr15|26277517|26279628	3.3783	5.34605	4.37962	4.33297	-0.359058	0.303117	0.015449	0.00398421	0.0789225	6	9	4	5	Intron (uc021sgd.1/100128714, intron 2 of 4)	503519	ENSG00000259150	LINC00929	chr15	26277517	26279628
chr15|26373874|26374152	6.1337	9.91253	9.45501	10.518	-0.778028	-0.0855316	-0.153706	0.0029372	0.0726152	1	2	0	1	Intron (uc021sgf.1/503519, intron 3 of 5)	503519	ENSG00000259150	LINC00929	chr15	26373874	26374152
chr1|52642048|52642716	6.20792	5.75864	3.79067	3.25133	0.93308	0.8247	0.221423	0.000126393	0.0606188	2	9	2	1	Intron (uc001ctn.4/9372, intron 1 of 4)	9372	ENSG00000157077	ZFYVE9	chr1	52642048	52642716
chr15|27189652|27190055	5.44634	8.03044	7.92566	7.04588	-0.371495	0.188697	0.16975	0.00558147	0.0874193	2	3	1	2	Exon (uc001zbe.1/uc001zbe.1, exon 1 of 1)	2562	ENSG00000166206	GABRB3	chr15	27189652	27190055
chr15|27228190|27229036	3.02188	3.45451	4.0565	3.74541	-0.309675	-0.116643	0.115114	0.00550594	0.0871131	3	3	1	1	Intron (uc001zbf.4/2567, intron 2 of 5)	2567	ENSG00000182256	GABRG3	chr15	27228190	27229036
chr15|27564844|27566143	2.37367	3.50531	3.21258	3.47828	-0.551253	0.0111685	-0.114643	0.000284276	0.0606188	6	6	4	2	Intron (uc001zbf.4/2567, intron 3 of 5)	2567	ENSG00000182256	GABRG3	chr15	27564844	27566143
chr15|27637585|27638416	2.16464	2.73424	2.96256	3.12294	-0.528776	-0.191765	-0.0760608	0.000442507	0.0606188	3	3	1	0	Intron (uc001zbf.4/2567, intron 5 of 5)	2567	ENSG00000182256	GABRG3	chr15	27637585	27638416
chr15|27683796|27684071	4.87028	5.97461	7.86301	7.04984	-0.533585	-0.238746	0.157491	0.00813735	0.0983779	1	1	0	0	Intron (uc001zbf.4/2567, intron 5 of 5)	2567	ENSG00000182256	GABRG3	chr15	27683796	27684071
chr15|27837711|27839518	2.50698	3.95176	3.52609	4.40569	-0.813414	-0.156872	-0.321296	0.00404457	0.0793368	6	9	4	4	Distal Intergenic	4948	ENSG00000104044	OCA2	chr15	27837711	27839518
chr15|27947533|27947922	3.92822	4.86362	6.49361	9.82426	-1.32247	-1.01432	-0.597329	0.00453642	0.0820866	5	5	0	1	Distal Intergenic	4948	ENSG00000104044	OCA2	chr15	27947533	27947922
chr15|27984682|27985531	2.38359	3.99814	3.53435	4.08793	-0.778233	-0.032043	-0.209929	0.000368984	0.0606188	6	6	0	3	Distal Intergenic	4948	ENSG00000104044	OCA2	chr15	27984682	27985531
chr15|28071957|28072841	3.47767	4.28599	4.64631	5.96723	-0.778941	-0.477434	-0.360975	0.000853249	0.0606188	8	9	1	3	Intron (uc001zbh.4/4948, intron 23 of 23)	4948	ENSG00000104044	OCA2	chr15	28071957	28072841
chr15|29469949|29470544	4.02625	6.09324	6.08232	5.57367	-0.469189	0.128583	0.125996	0.000641673	0.0606188	9	7	0	3	Intron (uc001zcn.2/23359, intron 1 of 7)	23359	ENSG00000104059	FAM189A1	chr15	29469949	29470544
chr15|29701384|29701691	5.41524	6.39299	7.69505	7.94532	-0.55308	-0.313614	-0.0461743	0.00546359	0.086796	1	2	0	1	Intron (uc010azk.1/23359, intron 1 of 10)	56160	ENSG00000185115	NSMCE3	chr15	29701384	29701691
chr15|29721874|29723700	2.42917	3.30399	3.2467	3.18354	-0.390167	0.0535788	0.0283436	0.0020318	0.0662792	10	6	2	3	Intron (uc010azk.1/23359, intron 1 of 10)	23359	ENSG00000104059	FAM189A1	chr15	29721874	29723700
chr15|29846948|29849311	3.04684	4.24461	3.82386	4.09356	-0.426044	0.052275	-0.0983265	0.00638965	0.091184	10	12	0	4	Intron (uc010azk.1/23359, intron 1 of 10)	23359	ENSG00000104059	FAM189A1	chr15	29846948	29849311
chr15|29935840|29936932	2.63514	3.58134	3.47588	3.47145	-0.397656	0.0449609	0.00183972	0.00510824	0.0851276	2	6	0	1	Distal Intergenic	23359	ENSG00000104059	FAM189A1	chr15	29935840	29936932
chr15|31095190|31098075	2.07744	2.52417	2.73359	2.77238	-0.416315	-0.135315	-0.0203265	9.25972e-05	0.0606188	9	10	2	0	Distal Intergenic	390561	#N/A	HERC2P10	chr15	31095190	31098075
chr15|31161470|31161766	4.69607	5.28187	6.75006	7.56828	-0.688513	-0.518917	-0.165065	0.000670167	0.0606188	1	0	0	1	Distal Intergenic	22909	ENSG00000198690	FAN1	chr15	31161470	31161766
chr15|31216953|31218613	4.43652	4.21955	5.72849	5.29142	-0.254226	-0.326563	0.1145	0.00567347	0.0878579	6	5	4	1	Exon (uc001zfe.3/22909, exon 10 of 16)	22909	ENSG00000198690	FAN1	chr15	31216953	31218613
chr15|31492997|31493520	4.12928	6.77411	6.95554	6.70284	-0.698883	0.0152587	0.0533905	0.00305912	0.0732292	5	3	1	1	Distal Intergenic	283710	#N/A	LOC283710	chr15	31492997	31493520
chr15|31603425|31604748	3.82524	5.50094	4.61765	4.9259	-0.364839	0.15929	-0.0932299	0.00807139	0.0980484	8	8	4	4	Distal Intergenic	51621	ENSG00000169926	KLF13	chr15	31603425	31604748
chr15|31890120|31890672	3.01836	2.35753	1.94268	1.68482	0.841171	0.484685	0.205455	0.00543142	0.0867149	3	5	1	1	Intron (uc001zfq.3/161725, intron 1 of 10)	161725	ENSG00000169918	OTUD7A	chr15	31890120	31890672
chr15|31997353|31997748	8.51221	10.4646	15.6105	18.5727	-1.12558	-0.827674	-0.25067	0.000352425	0.0606188	8	6	0	3	Intron (uc001zfr.3/161725, intron 1 of 12)	161725	ENSG00000169918	OTUD7A	chr15	31997353	31997748
chr1|53312183|53312613	4.31552	1.9609	3.58012	3.18778	0.436984	-0.701032	0.167458	0.00494598	0.0843022	2	5	1	0	Intron (uc001cuk.2/440590, intron 1 of 13)	440590	ENSG00000203995	ZYG11A	chr1	53312183	53312613
chr15|33308705|33308976	6.41098	7.65067	9.4679	10.2888	-0.682456	-0.427414	-0.119956	0.00140522	0.0622804	1	1	0	1	Intron (uc001zhf.5/342184, intron 2 of 16)	342184	ENSG00000248905	FMN1	chr15	33308705	33308976
chr15|34428726|34429412	3.83764	4.03926	5.00991	5.69458	-0.56937	-0.495499	-0.184803	0.00349862	0.0760146	4	1	3	0	Distal Intergenic	161779	ENSG00000182405	PGBD4	chr15	34428726	34429412
chr15|35218117|35218625	4.30052	3.24029	5.7828	5.58272	-0.376458	-0.784846	0.0507997	0.00612297	0.0900523	4	5	1	0	Intron (uc001ziv.3/9716, intron 13 of 34)	9716	ENSG00000021776	AQR	chr15	35218117	35218625
chr15|35394984|35395309	5.1282	3.69057	6.4007	6.60143	-0.364328	-0.838935	-0.0445499	0.004791	0.0835921	0	5	1	0	Distal Intergenic	54989	ENSG00000198146	ZNF770	chr15	35394984	35395309
chr1|53588497|53589628	4.53547	7.50289	8.07953	9.21823	-1.02324	-0.297044	-0.190218	0.000134163	0.0606188	3	4	1	5	Intron (uc021onm.1/6512, intron 2 of 9)	6512	ENSG00000162383	SLC1A7	chr1	53588497	53589628
chr15|36922616|36923192	5.19321	4.81518	7.30801	6.96652	-0.423813	-0.532848	0.0690401	0.00289587	0.0722026	4	8	3	1	Intron (uc001zje.4/84529, intron 1 of 11)	84529	ENSG00000186073	C15orf41	chr15	36922616	36923192
chr15|37004109|37004561	3.65674	2.58458	5.05837	3.61337	0.0172148	-0.483415	0.48533	0.00562728	0.0877186	10	7	1	0	Intron (uc001zje.4/84529, intron 10 of 11)	84529	ENSG00000186073	C15orf41	chr15	37004109	37004561
chr15|37331001|37331324	5.74026	7.6223	8.71043	8.21271	-0.516743	-0.107632	0.0848851	0.00270514	0.0709494	1	3	1	1	Intron (uc001zjl.3/4212, intron 6 of 11)	4212	ENSG00000134138	MEIS2	chr15	37331001	37331324
chr15|37461337|37461674	5.19019	2.34139	4.92254	3.43598	0.595065	-0.553358	0.518683	0.00649186	0.0915769	2	5	1	0	Distal Intergenic	4212	ENSG00000134138	MEIS2	chr15	37461337	37461674
chr15|37561266|37561869	4.52295	3.46952	6.06651	5.43697	-0.265537	-0.648066	0.158066	0.00692649	0.0935231	4	5	2	1	Distal Intergenic	4212	ENSG00000134138	MEIS2	chr15	37561266	37561869
chr15|37783026|37783435	3.78328	4.48733	5.45246	5.887	-0.637897	-0.391675	-0.110626	0.00322411	0.0742513	3	3	0	0	Distal Intergenic	4212	ENSG00000134138	MEIS2	chr15	37783026	37783435
chr15|38422318|38422594	5.55157	7.7964	8.53052	10.6153	-0.935179	-0.445266	-0.31544	0.000473687	0.0606188	2	2	0	1	Distal Intergenic	161742	ENSG00000166068	SPRED1	chr15	38422318	38422594
chr15|39157114|39157464	6.27927	6.58367	9.83937	10.7637	-0.777504	-0.70921	-0.129535	0.000235187	0.0606188	3	2	1	1	Distal Intergenic	400359	ENSG00000175779	C15orf53	chr15	39157114	39157464
chr15|39244561|39244882	5.40106	5.84359	7.60408	8.99676	-0.736161	-0.622551	-0.24263	0.00320942	0.0741586	0	3	1	0	Distal Intergenic	400359	ENSG00000175779	C15orf53	chr15	39244561	39244882
chr15|39864411|39864761	3.88898	3.64411	5.85023	4.55822	-0.229079	-0.322903	0.360024	0.00208847	0.0667431	3	2	1	0	Distal Intergenic	7057	ENSG00000137801	THBS1	chr15	39864411	39864761
chr15|39932737|39933320	2.43556	3.1633	3.61554	3.13333	-0.363442	0.0137348	0.206515	0.00608972	0.0898586	1	1	0	1	Intron (uc001zki.3/161835, intron 10 of 11)	7057	ENSG00000137801	THBS1	chr15	39932737	39933320
chr15|40078432|40079515	2.7894	5.53586	4.66417	4.9029	-0.813682	0.17517	-0.0720172	0.0013402	0.0620006	5	4	0	5	Distal Intergenic	161835	ENSG00000150667	FSIP1	chr15	40078432	40079515
chr1|54037000|54037412	4.75582	1.96706	2.22394	2.61035	0.86545	-0.408205	-0.231129	0.00766576	0.0963923	3	7	1	0	Intron (uc001cvr.1/148979, intron 3 of 9)	63948	ENSG00000143006	DMRTB1	chr1	54037000	54037412
chr15|40376622|40378342	2.95556	3.92001	3.82118	3.41809	-0.209757	0.197668	0.160829	0.00677441	0.0928278	2	5	0	3	Downstream (1-2kb)	90427	ENSG00000104081	BMF	chr15	40376622	40378342
chr15|40594344|40595528	4.89134	5.46254	6.74939	5.29671	-0.114866	0.0444757	0.34966	0.00300921	0.0729686	7	4	1	1	Exon (uc001zld.3/5330, exon 3 of 32)	5330	ENSG00000137841	PLCB2	chr15	40594344	40595528
chr15|40834535|40835949	2.50264	3.43509	3.31183	3.2683	-0.385089	0.071807	0.0190857	0.00232911	0.0685406	3	4	1	1	Intron (uc001zly.3/90416, intron 3 of 3)	359821	#N/A	MRPL42P5	chr15	40834535	40835949
chr15|41473442|41474568	2.9402	3.95335	3.80372	4.34184	-0.562389	-0.135228	-0.190896	0.00167872	0.0639169	5	7	0	1	Downstream (<1kb)	161829	ENSG00000178997	EXD1	chr15	41473442	41474568
chr15|42196096|42196577	4.15656	5.13724	6.05808	5.56206	-0.420231	-0.114626	0.123241	0.00525185	0.0857669	1	3	0	1	Intron (uc001zot.3/30844, intron 5 of 5)	51332	ENSG00000137877	SPTBN5	chr15	42196096	42196577
chr15|42869443|42869922	3.71607	5.38019	5.31219	6.82279	-0.876586	-0.342705	-0.361057	0.00138596	0.0621556	0	5	1	1	Promoter (1-2kb)	57519	ENSG00000159433	STARD9	chr15	42869443	42869922
chr15|43502561|43503443	4.12513	4.14262	5.65356	4.81908	-0.224318	-0.218214	0.230404	0.00373105	0.0774695	4	5	1	0	Promoter (<=1kb)	2038	ENSG00000166947	EPB42	chr15	43502561	43503443
chr15|43695554|43695876	4.59955	3.5818	5.71522	5.88935	-0.356615	-0.717422	-0.0432999	0.00555618	0.0873703	0	5	1	0	Intron (uc001zrn.3/27229, intron 15 of 17)	7158	ENSG00000067369	TP53BP1	chr15	43695554	43695876
chr15|44903757|44904138	4.34469	2.11376	4.03872	2.81953	0.6238	-0.415644	0.518444	0.00673768	0.0926703	6	7	1	0	Intron (uc001ztx.3/80208, intron 17 of 39)	80208	ENSG00000104133	SPG11	chr15	44903757	44904138
chr15|44964152|44964538	4.61745	5.09957	7.68099	5.25868	-0.187604	-0.0443237	0.546593	0.00778106	0.096921	2	2	1	1	5' UTR	197135	ENSG00000229474	PATL2	chr15	44964152	44964538
chr15|45396782|45397113	4.74483	6.52289	7.72932	8.22621	-0.793872	-0.334717	-0.0898869	0.00121731	0.0612161	2	2	1	0	Intron (uc001zun.3/50506, intron 18 of 33)	50506	ENSG00000140279	DUOX2	chr15	45396782	45397113
chr15|45436290|45437347	3.03566	3.96517	4.52779	3.88998	-0.357751	0.0276192	0.219043	0.00680826	0.0929863	3	4	2	0	Promoter (2-3kb)	53905	ENSG00000137857	DUOX1	chr15	45436290	45437347
chr15|46006852|46007180	5.01525	7.69356	8.69326	9.10211	-0.859879	-0.24255	-0.0663035	0.000397767	0.0606188	0	2	1	1	Distal Intergenic	58472	ENSG00000137767	SQOR	chr15	46006852	46007180
chr1|54713400|54714315	4.84676	3.33398	4.75844	3.76289	0.365181	-0.174596	0.338649	0.0048502	0.0839553	4	9	0	0	Intron (uc001cxe.4/23648, intron 9 of 17)	51253	ENSG00000116221	MRPL37	chr1	54713400	54714315
chr15|47293949|47294293	7.05096	7.53187	10.3322	11.4579	-0.700448	-0.605258	-0.149189	0.00789094	0.0974134	4	4	1	1	Distal Intergenic	80031	ENSG00000137872	SEMA6D	chr15	47293949	47294293
chr1|54744615|54745744	3.71873	2.6299	2.80379	2.51808	0.562487	0.0626864	0.155055	0.00507814	0.0849683	1	4	0	0	Intron (uc001cxe.4/23648, intron 5 of 17)	51253	ENSG00000116221	MRPL37	chr1	54744615	54745744
chr15|48015235|48015604	7.68404	6.57373	11.6197	10.6918	-0.476563	-0.701717	0.120077	0.00687646	0.0932294	10	7	1	1	Intron (uc001zvw.3/80031, intron 4 of 19)	80031	ENSG00000137872	SEMA6D	chr15	48015235	48015604
chr15|48239031|48239555	5.21695	4.51772	6.73068	6.66443	-0.353274	-0.560888	0.0142713	0.00540435	0.0865745	8	8	0	0	Distal Intergenic	283652	ENSG00000188467	SLC24A5	chr15	48239031	48239555
chr15|48418868|48419946	2.43596	3.78478	3.50455	3.50367	-0.524376	0.111342	0.000360929	0.000140301	0.0606188	3	3	0	1	Intron (uc001zwe.3/283652, intron 2 of 8)	283652	ENSG00000188467	SLC24A5	chr15	48418868	48419946
chr15|48441131|48441513	5.2481	2.49065	5.9684	4.6247	0.182436	-0.892838	0.367985	0.00450556	0.0820102	5	5	1	0	Promoter (<=1kb)	50804	ENSG00000104177	MYEF2	chr15	48441131	48441513
chr15|49032912|49033237	4.10397	2.38362	5.11137	5.15884	-0.330026	-1.11389	-0.0133368	0.00820384	0.098678	0	4	1	0	Intron (uc001zwy.3/22995, intron 25 of 25)	22995	ENSG00000103995	CEP152	chr15	49032912	49033237
chr15|49787577|49788145	3.8947	2.92609	5.25892	4.29457	-0.141003	-0.553542	0.292252	0.00513618	0.0853475	6	3	1	0	Intron (uc001zxl.2/196951, intron 11 of 15)	2252	ENSG00000140285	FGF7	chr15	49787577	49788145
chr15|50038200|50038499	5.31199	5.45122	7.67951	8.40129	-0.661359	-0.624033	-0.129597	0.00430307	0.0808547	1	1	0	0	Distal Intergenic	56986	ENSG00000104047	DTWD1	chr15	50038200	50038499
chr15|51447681|51448134	3.7784	3.88539	5.41471	4.88896	-0.371751	-0.331469	0.147356	0.00175759	0.0643355	2	3	0	1	Distal Intergenic	388121	ENSG00000183578	TNFAIP8L3	chr15	51447681	51448134
chr15|51649884|51652816	2.40196	2.88592	3.27141	2.94587	-0.294479	-0.0296608	0.151219	0.00437419	0.081192	7	8	2	2	Intron (uc010bez.1/342035, intron 1 of 2)	342035	ENSG00000186417	GLDN	chr15	51649884	51652816
chr15|52060416|52061058	3.73631	3.09129	4.63465	4.45757	-0.254643	-0.528048	0.0562027	0.00755214	0.0959904	1	3	1	0	5' UTR	29767	ENSG00000128872	TMOD2	chr15	52060416	52061058
chr15|52279657|52280056	3.37327	4.34149	5.34141	4.45729	-0.402019	-0.0379745	0.261055	0.00424854	0.0805154	6	4	0	1	Distal Intergenic	123169	ENSG00000166477	LEO1	chr15	52279657	52280056
chr15|52314269|52315230	3.74783	4.72794	4.99718	5.7238	-0.610918	-0.275759	-0.195859	0.0070149	0.0937297	1	9	0	3	Promoter (2-3kb)	5597	ENSG00000069956	MAPK6	chr15	52314269	52315230
chr15|52828460|52829068	5.01727	5.24597	7.15225	6.10895	-0.284022	-0.219716	0.227473	0.00580109	0.0885296	9	8	3	1	Distal Intergenic	4644	ENSG00000197535	MYO5A	chr15	52828460	52829068
chr15|53064311|53064908	3.75936	5.3895	5.10196	4.24316	-0.174651	0.345012	0.265914	0.00434244	0.0810261	1	4	1	3	Intron (uc031qsb.1/3175, intron 1 of 1)	3175	ENSG00000169856	ONECUT1	chr15	53064311	53064908
chr1|55308744|55309598	4.2075	2.76834	3.9339	3.17693	0.405333	-0.198614	0.308329	0.00539454	0.0865404	8	11	1	0	Distal Intergenic	1718	ENSG00000116133	DHCR24	chr1	55308744	55309598
chr15|53261332|53261905	3.97767	5.89298	5.21775	6.37609	-0.680749	-0.113675	-0.289244	0.00529498	0.0859473	4	6	3	1	Distal Intergenic	3175	ENSG00000169856	ONECUT1	chr15	53261332	53261905
chr15|53832552|53833311	4.03327	5.32833	5.8598	5.90044	-0.548871	-0.147137	-0.00997067	0.00244719	0.0692467	5	6	1	1	Promoter (<=1kb)	256764	ENSG00000166415	WDR72	chr15	53832552	53833311
chr15|53991713|53992012	5.38827	5.08031	8.32287	7.82749	-0.538727	-0.623633	0.088532	0.0020524	0.0664751	1	3	0	1	Exon (uc002acj.2/256764, exon 13 of 20)	256764	ENSG00000166415	WDR72	chr15	53991713	53992012
chr1|5542127|5542439	2.48694	5.25241	4.05625	7.34486	-1.56237	-0.483757	-0.856588	0.00590469	0.0889394	0	2	0	1	Distal Intergenic	100616489	ENSG00000264341	MIR4417	chr1	5542127	5542439
chr15|54597748|54599179	2.44528	3.60887	4.01957	4.60533	-0.913305	-0.351757	-0.196265	0.00240278	0.068995	3	5	0	2	Intron (uc021smr.1/440279, intron 11 of 30)	440279	ENSG00000137766	UNC13C	chr15	54597748	54599179
chr15|54832999|54833279	5.33647	7.09312	7.51476	9.38956	-0.815172	-0.404636	-0.321331	0.0018537	0.0648937	1	2	0	1	Intron (uc021smr.1/440279, intron 24 of 30)	440279	ENSG00000137766	UNC13C	chr15	54832999	54833279
chr15|55400907|55401215	3.49305	3.343	5.37938	5.5111	-0.657851	-0.721196	-0.0349002	0.00181832	0.0646663	0	3	0	0	Distal Intergenic	51187	ENSG00000137876	RSL24D1	chr15	55400907	55401215
chr15|55417061|55417349	4.99672	5.1882	7.78474	8.65084	-0.791858	-0.737605	-0.152191	0.00215262	0.0670902	1	2	0	1	Distal Intergenic	51187	ENSG00000137876	RSL24D1	chr15	55417061	55417349
chr15|55750892|55751199	5.08739	5.91028	6.80738	8.31049	-0.708006	-0.491708	-0.287833	0.00337781	0.0751637	0	3	0	0	Intron (uc002acy.3/100533483, intron 4 of 15)	100533483	ENSG00000261771	DNAAF4-CCPG1	chr15	55750892	55751199
chr15|55786061|55786703	3.42248	4.12879	4.6344	4.97983	-0.541056	-0.270378	-0.103714	0.000757446	0.0606188	3	3	1	0	Intron (uc002acy.3/100533483, intron 2 of 15)	100533483	ENSG00000261771	DNAAF4-CCPG1	chr15	55786061	55786703
chr15|56608889|56609273	4.27467	4.47654	6.2986	6.49029	-0.60247	-0.535899	-0.0432518	0.00646542	0.0914902	1	3	0	0	Distal Intergenic	374618	ENSG00000151575	TEX9	chr15	56608889	56609273
chr15|57254254|57254558	5.52796	3.86521	7.20514	7.23596	-0.388437	-0.904638	-0.00615781	0.00201418	0.0661571	0	3	0	0	Intron (uc010ugm.1/6938, intron 3 of 18)	6938	ENSG00000140262	TCF12	chr15	57254254	57254558
chr15|57811111|57812040	1.96872	2.58491	2.46174	3.06644	-0.639306	-0.246448	-0.316887	0.000289605	0.0606188	3	6	2	2	Intron (uc002aeg.3/84952, intron 10 of 18)	100820829	ENSG00000263155	MYZAP	chr15	57811111	57812040
chr15|58690752|58691523	2.71461	2.35473	3.37282	2.78651	-0.0377157	-0.242898	0.275496	0.00574605	0.0881672	3	8	2	0	Distal Intergenic	3990	ENSG00000166035	LIPC	chr15	58690752	58691523
chr15|59165553|59166409	3.88877	2.90018	4.35304	4.15652	-0.0960598	-0.51923	0.0666488	0.00633771	0.0909591	3	9	3	1	Distal Intergenic	79811	ENSG00000137776	SLTM	chr15	59165553	59166409
chr15|60180956|60181337	5.23633	2.43671	5.02942	4.34742	0.268395	-0.835224	0.21023	0.00530943	0.0860965	5	6	1	0	Distal Intergenic	27023	ENSG00000171956	FOXB1	chr15	60180956	60181337
chr15|60195493|60196153	5.85825	6.13044	8.33892	7.67622	-0.389927	-0.324406	0.119465	0.00596935	0.0893451	6	8	4	1	Distal Intergenic	27023	ENSG00000171956	FOXB1	chr15	60195493	60196153
chr15|60563378|60564742	2.39322	2.94762	3.40093	3.14355	-0.393442	-0.0928431	0.113534	0.00592079	0.0890834	4	8	0	0	Distal Intergenic	302	ENSG00000182718	ANXA2	chr15	60563378	60564742
chr15|60938714|60939078	4.75154	2.23725	4.36675	3.60735	0.397453	-0.689215	0.275618	0.00650069	0.0915769	4	6	1	0	Intron (uc002agx.3/6095, intron 2 of 10)	6095	ENSG00000069667	RORA	chr15	60938714	60939078
chr1|56106675|56107023	5.91107	6.89987	8.95823	12.4109	-1.07012	-0.846969	-0.470323	0.00490566	0.0841902	5	1	0	1	Intron (uc001cyi.1/uc001cyi.1, intron 2 of 2)	100616272	ENSG00000265822	MIR4422	chr1	56106675	56107023
chr15|61087349|61087638	4.29012	4.31306	6.45448	6.91843	-0.689427	-0.681734	-0.100144	0.00282267	0.0716958	0	2	0	0	Intron (uc002agx.3/6095, intron 1 of 10)	6095	ENSG00000069667	RORA	chr15	61087349	61087638
chr15|61253816|61254224	3.80866	3.5476	6.01568	6.15909	-0.693431	-0.795873	-0.0339891	0.000555196	0.0606188	2	4	1	1	Intron (uc002agx.3/6095, intron 1 of 10)	6095	ENSG00000069667	RORA	chr15	61253816	61254224
chr15|61695684|61696479	2.83034	3.88685	3.82744	4.42849	-0.645837	-0.188212	-0.210434	0.00367029	0.0770802	7	7	0	3	Distal Intergenic	6095	ENSG00000069667	RORA	chr15	61695684	61696479
chr15|62051668|62052040	6.8096	9.7743	11.8456	11.7836	-0.79114	-0.269717	0.00756344	0.00837242	0.0993068	4	3	0	2	Distal Intergenic	54832	ENSG00000129003	VPS13C	chr15	62051668	62052040
chr15|62089502|62090163	4.40599	4.11526	5.99585	6.08767	-0.466424	-0.564906	-0.0219251	0.00209422	0.0667431	0	3	1	0	Distal Intergenic	54832	ENSG00000129003	VPS13C	chr15	62089502	62090163
chr15|62098944|62099570	4.02692	5.31022	5.97429	5.87175	-0.544114	-0.14502	0.0249755	0.00499344	0.0846124	8	6	0	4	Distal Intergenic	54832	ENSG00000129003	VPS13C	chr15	62098944	62099570
chr15|62131883|62132934	2.72612	3.83848	3.97003	4.00849	-0.556211	-0.0625216	-0.0139072	0.00640416	0.0912093	4	5	1	3	Distal Intergenic	54832	ENSG00000129003	VPS13C	chr15	62131883	62132934
chr15|62414896|62416575	1.95383	2.88442	2.60491	2.52996	-0.37281	0.189169	0.0421212	0.0028382	0.0717556	7	11	1	4	Distal Intergenic	388125	ENSG00000205502	C2CD4B	chr15	62414896	62416575
chr15|62950878|62951852	3.18869	4.29537	4.31813	4.64842	-0.54378	-0.113959	-0.106335	0.00646835	0.0915119	8	10	2	3	Intron (uc002alb.4/83660, intron 6 of 55)	83660	ENSG00000171914	TLN2	chr15	62950878	62951852
chr15|63089348|63090304	2.8715	3.14323	3.91516	3.11703	-0.118368	0.0120759	0.328899	0.00329405	0.0746573	1	4	1	0	Exon (uc002alb.4/83660, exon 45 of 56)	83660	ENSG00000171914	TLN2	chr15	63089348	63090304
chr15|63510941|63511356	4.26451	3.22279	5.32266	5.85185	-0.456513	-0.860582	-0.136747	0.00162561	0.063485	0	4	1	0	Intron (uc002alz.3/51762, intron 1 of 7)	51762	ENSG00000166128	RAB8B	chr15	63510941	63511356
chr15|63728244|63729526	2.76663	4.18365	4.2861	4.20188	-0.602905	-0.00627074	0.0286308	3.44704e-05	0.0606188	2	4	0	4	Distal Intergenic	771	ENSG00000074410	CA12	chr15	63728244	63729526
chr15|64763873|64764409	3.89091	1.81806	2.46747	2.33348	0.737625	-0.360088	0.0805463	0.00667084	0.0923847	4	5	2	0	Intron (uc010bgy.3/uc010bgy.3, intron 1 of 1)	23060	ENSG00000180357	ZNF609	chr15	64763873	64764409
chr15|64970325|64971514	4.20824	3.77399	5.93925	4.55967	-0.115713	-0.272841	0.381351	0.00131456	0.0616432	3	8	3	0	Exon (uc002ann.3/23060, exon 5 of 9)	4947	ENSG00000180304	OAZ2	chr15	64970325	64971514
chr15|65363804|65364121	5.68692	10.367	11.7643	12.4417	-1.12946	-0.263185	-0.0807661	9.83434e-05	0.0606188	1	2	1	1	Intron (uc010uir.1/51285, intron 1 of 4)	51285	ENSG00000103710	RASL12	chr15	65363804	65364121
chr15|66363883|66364215	4.64807	3.83062	7.1577	6.2529	-0.427894	-0.706948	0.194969	0.00116683	0.0610212	1	4	1	0	Intron (uc002apl.2/84465, intron 3 of 20)	100422905	ENSG00000263512	MIR4311	chr15	66363883	66364215
chr15|66413915|66414252	4.5401	3.27601	6.06565	4.91833	-0.115445	-0.586227	0.302494	0.00457582	0.0823526	2	3	1	0	Intron (uc002apl.2/84465, intron 2 of 20)	100422905	ENSG00000263512	MIR4311	chr15	66413915	66414252
chr15|66513673|66514915	2.99946	4.35628	4.43844	4.03482	-0.427804	0.110591	0.137549	0.00843699	0.0993934	9	6	0	4	Intron (uc002apl.2/84465, intron 1 of 20)	84465	ENSG00000157890	MEGF11	chr15	66513673	66514915
chr15|67065702|67067359	4.02818	6.72509	6.50606	7.74325	-0.942811	-0.203385	-0.251155	0.000979872	0.0606188	8	10	1	5	Intron (uc002aqf.3/4091, intron 3 of 3)	4091	ENSG00000137834	SMAD6	chr15	67065702	67067359
chr15|67093502|67093883	5.68386	5.33013	8.60963	7.56328	-0.412141	-0.504843	0.186939	0.00836107	0.0992504	8	5	1	1	Distal Intergenic	4091	ENSG00000137834	SMAD6	chr15	67093502	67093883
chr15|68088999|68089288	4.72814	4.43691	6.6132	6.80915	-0.526203	-0.617919	-0.042126	0.00498663	0.0845628	1	2	0	1	Intron (uc002aqu.3/5607, intron 21 of 21)	390598	ENSG00000188779	SKOR1	chr15	68088999	68089288
chr15|68188440|68189435	2.05943	2.62571	2.72221	2.50513	-0.282638	0.067826	0.119897	0.00460716	0.0825983	1	3	0	0	Distal Intergenic	390598	ENSG00000188779	SKOR1	chr15	68188440	68189435
chr15|68803035|68803728	3.49591	3.4559	4.9944	5.12536	-0.551985	-0.568592	-0.0373426	0.00222584	0.0676542	8	6	2	0	Distal Intergenic	10391	ENSG00000103647	CORO2B	chr15	68803035	68803728
chr15|69759605|69760865	3.22041	3.76589	2.03155	2.01266	0.67814	0.903884	0.0134766	0.00079691	0.0606188	1	9	3	3	Promoter (<=1kb)	145837	#N/A	DRAIC	chr15	69759605	69760865
chr1|56985637|56986092	3.79887	2.09581	2.10301	2.31319	0.715685	-0.14238	-0.137429	0.00426794	0.0806584	0	10	2	0	Intron (uc001cyj.2/8613, intron 4 of 5)	8613	ENSG00000162407	PLPP3	chr1	56985637	56986092
chr15|70037924|70038277	4.69576	3.67439	6.29472	5.09519	-0.117778	-0.471632	0.305006	0.0025712	0.0700681	1	1	1	0	Distal Intergenic	414926	ENSG00000259703	LINC00593	chr15	70037924	70038277
chr15|70073173|70074129	3.90938	3.84872	4.96274	5.5048	-0.493751	-0.516312	-0.149554	0.00662864	0.0921558	3	5	4	3	Distal Intergenic	414926	ENSG00000259703	LINC00593	chr15	70073173	70074129
chr15|70202079|70202488	3.7042	1.76209	3.54762	2.96358	0.321819	-0.750057	0.259511	0.00443838	0.0816278	4	4	1	0	Distal Intergenic	414926	ENSG00000259703	LINC00593	chr15	70202079	70202488
chr1|5704537|5705261	4.68878	2.63863	3.78015	2.98703	0.6505	-0.178925	0.339731	0.00787668	0.0973071	3	5	2	0	Intron (uc001alp.1/uc001alp.1, intron 1 of 2)	100616489	ENSG00000264341	MIR4417	chr1	5704537	5705261
chr15|70517706|70519929	1.87398	2.60331	2.60817	2.48719	-0.40841	0.0658317	0.0685243	0.00764498	0.0963775	8	6	4	2	Distal Intergenic	7090	ENSG00000140332	TLE3	chr15	70517706	70519929
chr15|70558188|70558473	4.81626	5.23822	3.46492	4.46154	0.110371	0.231536	-0.364718	0.00751464	0.0958718	0	3	0	0	Distal Intergenic	7090	ENSG00000140332	TLE3	chr15	70558188	70558473
chr15|70559259|70559588	6.32771	7.96924	9.22248	10.6693	-0.753716	-0.420959	-0.210246	0.00643909	0.091333	1	3	1	0	Distal Intergenic	7090	ENSG00000140332	TLE3	chr15	70559259	70559588
chr15|70618517|70619397	2.26807	2.83314	2.71482	3.04629	-0.425587	-0.104648	-0.166193	0.00124737	0.0613287	2	4	1	0	Distal Intergenic	7090	ENSG00000140332	TLE3	chr15	70618517	70619397
chr15|70897222|70898248	2.83391	3.39852	4.50735	4.33802	-0.614243	-0.352129	0.0552431	0.00764152	0.0963775	1	3	0	3	Distal Intergenic	55075	ENSG00000137831	UACA	chr15	70897222	70898248
chr15|71006674|71007080	5.35264	9.03901	9.84762	13.2826	-1.31121	-0.555296	-0.431687	0.000196177	0.0606188	6	7	0	3	Intron (uc002asr.3/55075, intron 1 of 18)	55075	ENSG00000137831	UACA	chr15	71006674	71007080
chr15|72111041|72111336	4.16273	1.81138	3.94378	3.41244	0.286726	-0.913716	0.208776	0.00360229	0.0766216	0	3	0	0	Distal Intergenic	10002	ENSG00000278570	NR2E3	chr15	72111041	72111336
chr15|73069941|73070620	5.20217	2.87839	5.88031	4.03567	0.366306	-0.487545	0.543084	0.00852898	0.0997758	8	7	3	0	Promoter (2-3kb)	83440	ENSG00000159322	ADPGK	chr15	73069941	73070620
chr15|73263812|73264969	3.79948	5.38328	6.27756	6.66979	-0.811839	-0.309158	-0.0874391	0.000100994	0.0606188	10	9	0	4	Distal Intergenic	4756	ENSG00000067141	NEO1	chr15	73263812	73264969
chr1|5742797|5743095	4.59885	5.68311	6.87554	9.2541	-1.00882	-0.703411	-0.42862	0.000532302	0.0606188	0	2	0	1	Distal Intergenic	100616489	ENSG00000264341	MIR4417	chr1	5742797	5743095
chr15|74523216|74524392	1.96415	1.72264	1.2043	1.28549	0.611587	0.4223	-0.0941205	0.00512452	0.0852555	1	5	0	0	Distal Intergenic	80125	ENSG00000140481	CCDC33	chr15	74523216	74524392
chr1|57452883|57453372	4.80574	1.94786	3.65633	3.47649	0.467128	-0.83574	0.0727644	0.000875583	0.0606188	1	3	1	0	Distal Intergenic	732	ENSG00000021852	C8B	chr1	57452883	57453372
chr15|74881028|74881462	3.50538	4.80616	6.16475	6.30692	-0.847365	-0.392052	-0.0328928	0.00070609	0.0606188	9	6	2	4	Promoter (2-3kb)	10620	ENSG00000179361	ARID3B	chr15	74881028	74881462
chr15|75482884|75483355	4.26225	1.9813	3.17243	2.78074	0.616145	-0.489021	0.190116	0.00590469	0.0889394	7	6	3	0	Distal Intergenic	56905	ENSG00000167173	C15orf39	chr15	75482884	75483355
chr15|78963520|78964486	3.06477	3.41214	3.19799	3.83549	-0.323633	-0.168731	-0.262245	0.00316575	0.0738935	0	3	1	1	Distal Intergenic	1143	ENSG00000117971	CHRNB4	chr15	78963520	78964486
chr15|79089801|79090543	3.92025	2.51499	3.16797	2.07837	0.915493	0.275098	0.608104	0.00824846	0.0988243	7	7	1	1	Exon (uc002bej.4/11173, exon 3 of 24)	11173	ENSG00000136378	ADAMTS7	chr15	79089801	79090543
chr15|80333881|80334290	4.18951	2.08947	3.34578	3.38506	0.307603	-0.696042	-0.0168387	0.00584072	0.0887407	6	6	2	0	Distal Intergenic	54469	ENSG00000086666	ZFAND6	chr15	80333881	80334290
chr15|81201373|81202717	3.7824	2.06553	3.9751	2.79176	0.438123	-0.434668	0.509815	0.00340102	0.0752956	9	6	2	0	Exon (uc002bfw.1/57214, exon 13 of 29)	693132	ENSG00000208003	MIR549A	chr15	81201373	81202717
chr15|81582312|81583140	3.45506	2.53893	4.59067	4.07512	-0.238133	-0.682622	0.171865	0.00146795	0.0626841	3	4	2	0	Promoter (1-2kb)	3603	ENSG00000172349	IL16	chr15	81582312	81583140
chr1|58165507|58165804	5.26933	2.56433	6.13605	5.44583	-0.0475311	-1.08657	0.172158	0.00415288	0.0799895	0	2	0	0	Intron (uc001cys.1/1600, intron 2 of 16)	1600	ENSG00000173406	DAB1	chr1	58165507	58165804
chr15|86775266|86775899	5.47275	6.35475	8.39759	8.8541	-0.69408	-0.47851	-0.0763711	0.000206669	0.0606188	2	4	3	1	Intron (uc002blz.1/123624, intron 5 of 23)	123624	ENSG00000273540	AGBL1	chr15	86775266	86775899
chr15|86847626|86847907	5.95257	6.57541	9.25477	9.20188	-0.628415	-0.484847	0.00826897	0.00304239	0.0731652	1	2	0	1	Intron (uc002blz.1/123624, intron 16 of 23)	727915	ENSG00000260125	AGBL1-AS1	chr15	86847626	86847907
chr15|87266723|87268013	3.19768	4.06573	4.38961	4.66805	-0.545795	-0.199305	-0.088727	0.00625774	0.0907198	12	7	1	1	Intron (uc002blz.1/123624, intron 22 of 23)	727915	ENSG00000260125	AGBL1-AS1	chr15	87266723	87268013
chr15|87952438|87952757	7.1202	3.944	9.5783	7.63188	-0.10012	-0.952376	0.327732	0.00576695	0.088318	1	1	1	0	Distal Intergenic	145978	ENSG00000259527	LINC00052	chr15	87952438	87952757
chr15|90156767|90157242	4.77256	2.23402	4.3247	3.55041	0.426777	-0.668345	0.284613	0.00343848	0.0755568	6	4	2	0	Intron (uc002boe.3/90381, intron 15 of 21)	374654	ENSG00000166813	KIF7	chr15	90156767	90157242
chr15|90513366|90513910	5.69211	2.93828	3.41297	4.06602	0.485346	-0.468645	-0.25259	0.0068578	0.0931696	2	4	3	0	Distal Intergenic	374655	ENSG00000140548	ZNF710	chr15	90513366	90513910
chr15|90557343|90557700	5.26119	2.44596	3.62992	3.197	0.71867	-0.386315	0.183219	0.00719507	0.0946282	2	5	1	0	Intron (uc002bov.2/374655, intron 1 of 4)	374655	ENSG00000140548	ZNF710	chr15	90557343	90557700
chr15|90747065|90747409	7.05948	2.59961	3.90059	3.40152	1.05338	-0.387882	0.197515	0.00225355	0.0678439	2	3	1	0	Promoter (2-3kb)	10509	ENSG00000185033	SEMA4B	chr15	90747065	90747409
chr15|91380540|91381130	2.28948	2.74589	1.54753	1.62523	0.494379	0.756633	-0.070676	0.00751804	0.0959002	1	6	0	2	Distal Intergenic	5045	ENSG00000140564	FURIN	chr15	91380540	91381130
chr1|59141613|59142014	4.43373	3.24845	5.68327	5.3887	-0.281416	-0.730187	0.0767838	0.0076519	0.0963775	7	5	1	0	Intron (uc001czc.3/114803, intron 6 of 16)	114803	ENSG00000162601	MYSM1	chr1	59141613	59142014
chr1|59168755|59169122	2.72294	2.74246	3.75046	3.98844	-0.550657	-0.54035	-0.0887558	0.00210577	0.0668634	1	3	1	0	Distal Intergenic	114803	ENSG00000162601	MYSM1	chr1	59168755	59169122
chr15|92468294|92468794	4.36807	1.85194	1.68835	2.59088	0.753555	-0.484399	-0.617828	0.00145452	0.0625518	2	6	1	0	Intron (uc002bqx.2/28232, intron 2 of 9)	28232	ENSG00000176463	SLCO3A1	chr15	92468294	92468794
chr15|92943918|92944655	5.6311	6.15276	3.99505	4.55564	0.305762	0.433578	-0.18944	0.00754873	0.0959843	6	4	2	1	Intron (uc002bra.3/8128, intron 1 of 5)	8128	ENSG00000140557	ST8SIA2	chr15	92943918	92944655
chr15|93159967|93161661	3.30508	4.27654	3.71227	3.89032	-0.235204	0.136553	-0.0675889	0.00848286	0.0996071	3	3	1	4	3' UTR	400451	ENSG00000185442	FAM174B	chr15	93159967	93161661
chr15|93372368|93372933	2.94109	2.27726	2.07436	1.95486	0.589281	0.220227	0.0855966	0.00207131	0.0665776	1	2	2	0	Distal Intergenic	728619	#N/A	ASB9P1	chr15	93372368	93372933
chr15|93832493|93833319	3.00797	3.2723	1.83545	2.1176	0.50636	0.627875	-0.206292	4.44299e-05	0.0606188	3	9	1	2	Distal Intergenic	56963	ENSG00000182175	RGMA	chr15	93832493	93833319
chr15|93958494|93959273	2.528	2.66515	1.42969	1.74699	0.533126	0.609344	-0.289168	0.000421689	0.0606188	1	5	2	1	Exon (uc002bsy.2/uc002bsy.2, exon 1 of 1)	56963	ENSG00000182175	RGMA	chr15	93958494	93959273
chr15|94098190|94098604	4.76377	2.30863	3.4619	3.11538	0.612693	-0.432376	0.152155	0.00427183	0.0806946	4	9	1	0	Distal Intergenic	56963	ENSG00000182175	RGMA	chr15	94098190	94098604
chr1|59507860|59508197	5.22797	3.99138	7.67171	7.68706	-0.556182	-0.945542	-0.00288264	0.000990774	0.0606188	3	3	1	0	Distal Intergenic	729467	ENSG00000224609	HSD52	chr1	59507860	59508197
chr15|96815134|96815489	4.72037	2.83424	5.95103	5.76547	-0.288537	-1.02447	0.0457011	0.00281752	0.0716958	2	0	1	0	Intron (uc031qud.1/644192, intron 5 of 7)	7026	ENSG00000185551	NR2F2	chr15	96815134	96815489
chr15|97552289|97552634	4.80255	2.3065	3.35064	3.63888	0.400308	-0.657788	-0.119058	0.00750105	0.0957881	2	1	1	1	Distal Intergenic	145946	ENSG00000185594	SPATA8	chr15	97552289	97552634
chr15|98237359|98238216	1.93404	1.64652	1.02204	1.29345	0.580395	0.348198	-0.339771	0.0068578	0.0931696	2	8	2	1	Distal Intergenic	91948	ENSG00000251209	LINC00923	chr15	98237359	98238216
chr15|99642935|99643273	5.26116	5.25255	5.2301	7.80637	-0.569271	-0.571633	-0.577812	0.00589398	0.0889174	1	2	1	1	Promoter (2-3kb)	23336	ENSG00000182253	SYNM	chr15	99642935	99643273
chr1|60829047|60830048	2.39586	2.45233	3.41563	3.36252	-0.489	-0.455388	0.0226113	0.000648232	0.0606188	2	3	0	0	Distal Intergenic	127795	ENSG00000162598	C1orf87	chr1	60829047	60830048
chr16|10026534|10026830	4.42026	2.16711	2.28391	2.69899	0.711712	-0.316647	-0.24091	0.00108994	0.0608256	0	2	0	0	Intron (uc002czo.4/2903, intron 3 of 12)	2903	ENSG00000183454	GRIN2A	chr16	10026534	10026830
chr1|61013554|61013902	5.20783	5.22113	7.59444	6.7452	-0.373179	-0.369498	0.171083	0.00592617	0.0891068	1	1	1	0	Distal Intergenic	127795	ENSG00000162598	C1orf87	chr1	61013554	61013902
chr16|10775659|10776017	4.93641	2.86202	6.5616	3.46581	0.510271	-0.276159	0.920856	0.0076519	0.0963775	2	2	1	0	Exon (uc002czz.1/146279, exon 4 of 7)	146279	ENSG00000153060	TEKT5	chr16	10775659	10776017
chr16|11241740|11242082	6.54151	2.64819	6.89883	5.80214	0.173039	-1.13158	0.249767	0.00497757	0.0845013	3	6	1	0	Intron (uc002dao.3/23274, intron 21 of 22)	23274	ENSG00000038532	CLEC16A	chr16	11241740	11242082
chr16|11644239|11644651	3.89582	1.61765	1.81415	1.81259	1.10387	-0.164152	0.00124302	0.00222584	0.0676542	4	5	1	0	Intron (uc002daz.3/9516, intron 3 of 3)	9516	ENSG00000189067	LITAF	chr16	11644239	11644651
chr16|1249674|1250067	6.33218	10.057	9.81168	9.6826	-0.612693	0.0547372	0.0191058	0.00607317	0.0897764	0	3	1	2	Intron (uc002cks.3/8912, intron 6 of 34)	8912	ENSG00000196557	CACNA1H	chr16	1249674	1250067
chr16|12686092|12686441	7.0403	11.3118	10.4548	10.5493	-0.583433	0.10068	-0.0129804	0.00372765	0.0774088	0	5	0	1	Distal Intergenic	100616195	ENSG00000264733	MIR4718	chr16	12686092	12686441
chr16|13199297|13199676	4.57016	6.22329	2.93268	3.79621	0.267687	0.713119	-0.372338	0.00145988	0.0626422	0	3	0	2	Intron (uc010uyy.2/729993, intron 2 of 4)	729993	ENSG00000237515	SHISA9	chr16	13199297	13199676
chr16|1344939|1346925	2.61017	3.43995	3.17709	2.9941	-0.197979	0.200263	0.0855797	0.00825592	0.0988243	4	5	1	1	Distal Intergenic	7329	ENSG00000103275	UBE2I	chr16	1344939	1346925
chr16|13449756|13450077	3.23067	3.65168	1.69049	2.00477	0.688395	0.865123	-0.245996	0.00144585	0.0624457	0	2	0	0	Distal Intergenic	729993	ENSG00000237515	SHISA9	chr16	13449756	13450077
chr1|61398151|61398476	4.29377	4.46669	6.00562	5.52389	-0.363441	-0.306479	0.120628	0.00164816	0.0637323	0	2	1	0	Distal Intergenic	4774	ENSG00000162599	NFIA	chr1	61398151	61398476
chr16|14215816|14216249	4.13119	1.72311	1.96387	2.2678	0.865266	-0.396281	-0.207592	0.00394805	0.078724	5	7	0	0	Intron (uc002dcg.3/57496, intron 2 of 16)	57496	ENSG00000186260	MKL2	chr16	14215816	14216249
chr16|14351081|14351426	5.91504	2.99732	6.85549	5.31911	0.153202	-0.827513	0.366074	0.00515724	0.0853475	4	1	1	0	Intron (uc002dcg.3/57496, intron 15 of 16)	57496	ENSG00000186260	MKL2	chr16	14351081	14351426
chr16|14483823|14484473	3.5258	2.04286	2.37379	2.27695	0.630846	-0.156514	0.060089	0.00256649	0.0700626	1	6	2	0	Distal Intergenic	100126355	ENSG00000199130	MIR365A	chr16	14483823	14484473
chr16|14591700|14592053	4.51831	5.45027	3.1104	3.04769	0.568067	0.838612	0.0293842	0.00278676	0.0716515	0	1	1	1	Intron (uc010uzc.2/5073, intron 21 of 23)	5073	ENSG00000140694	PARN	chr16	14591700	14592053
chr16|16065322|16065698	4.59145	2.31869	3.72364	3.74424	0.294278	-0.691361	-0.00795923	0.00251533	0.0697685	2	3	1	0	Intron (uc010bvi.3/4363, intron 1 of 30)	4363	ENSG00000103222	ABCC1	chr16	16065322	16065698
chr16|16117998|16118301	3.57699	1.96279	3.0384	3.16656	0.175833	-0.690006	-0.0596025	0.0068268	0.0930462	0	2	0	0	Intron (uc010bvi.3/4363, intron 5 of 30)	4363	ENSG00000103222	ABCC1	chr16	16117998	16118301
chr16|16233589|16233973	4.48026	2.12167	3.65372	2.91402	0.620571	-0.45781	0.326356	0.00688582	0.0932904	3	5	1	0	Intron (uc010bvi.3/4363, intron 30 of 30)	4363	ENSG00000103222	ABCC1	chr16	16233589	16233973
chr16|1682448|1683262	4.34959	3.00355	4.48819	3.11265	0.482736	-0.0514775	0.52799	0.00402252	0.0791321	4	3	2	0	Promoter (<=1kb)	57585	ENSG00000007545	CRAMP1	chr16	1682448	1683262
chr16|17322559|17323219	3.72591	2.15717	2.64658	2.2807	0.708117	-0.080336	0.214653	0.00174393	0.0642481	2	8	2	0	Intron (uc002dfa.3/64131, intron 3 of 11)	64131	ENSG00000103489	XYLT1	chr16	17322559	17323219
chr16|18075314|18075777	5.03545	4.42108	3.54277	3.44069	0.549423	0.361701	0.0421775	0.00571224	0.0880162	2	3	1	1	Distal Intergenic	100422836	ENSG00000266291	MIR3180-3	chr16	18075314	18075777
chr16|18930666|18932317	3.21019	2.64518	2.30844	2.10234	0.610667	0.331373	0.134925	0.0068578	0.0931696	4	9	0	0	Intron (uc002dfm.3/23049, intron 1 of 62)	23049	ENSG00000157106	SMG1	chr16	18930666	18932317
chr16|19186305|19186699	5.20904	2.14987	3.38966	3.53313	0.560071	-0.7167	-0.0598087	0.00282267	0.0716958	4	8	1	0	Promoter (2-3kb)	51760	ENSG00000103528	SYT17	chr16	19186305	19186699
chr16|19335948|19336567	2.59419	2.24429	1.82404	1.6615	0.642804	0.433777	0.134654	0.000417992	0.0606188	6	2	1	0	Distal Intergenic	728276	ENSG00000261210	CLEC19A	chr16	19335948	19336567
chr1|61956852|61959921	2.53692	2.85542	3.15517	2.85056	-0.168163	0.00246148	0.146475	0.00766576	0.0963923	7	7	3	2	Distal Intergenic	4774	ENSG00000162599	NFIA	chr1	61956852	61959921
chr16|19580774|19582243	3.3508	2.67957	3.9985	3.3358	0.00647384	-0.316027	0.261427	0.0048701	0.0839901	5	7	2	0	Exon (uc010vas.2/57020, exon 3 of 13)	57020	ENSG00000103544	C16orf62	chr16	19580774	19582243
chr16|20279814|20280188	5.78634	4.70318	6.71999	8.16347	-0.49653	-0.795545	-0.280723	0.00763115	0.0963725	1	3	0	0	Distal Intergenic	2813	ENSG00000169347	GP2	chr16	20279814	20280188
chr16|20923347|20923686	6.21373	3.24534	4.82652	4.78892	0.375761	-0.561331	0.0112833	0.00190544	0.0652836	2	3	1	0	Intron (uc010bwi.1/57149, intron 2 of 4)	57149	ENSG00000102897	LYRM1	chr16	20923347	20923686
chr16|22231217|22232165	2.4333	2.27415	1.68924	1.7362	0.486982	0.389393	-0.0395605	0.00693905	0.0935231	3	7	0	1	Intron (uc002dkh.3/29904, intron 1 of 18)	29904	ENSG00000103319	EEF2K	chr16	22231217	22232165
chr16|22881954|22882603	4.05194	3.93176	2.67786	2.96044	0.452802	0.409365	-0.144733	0.00374298	0.0775448	11	13	2	3	Intron (uc002dli.3/9956, intron 1 of 1)	9956	ENSG00000122254	HS3ST2	chr16	22881954	22882603
chr16|22948936|22949432	4.15462	3.14545	2.56066	2.69037	0.626909	0.225457	-0.0712904	0.00523755	0.0856361	3	9	2	2	Distal Intergenic	9956	ENSG00000122254	HS3ST2	chr16	22948936	22949432
chr16|23147904|23148285	5.00913	1.87901	2.74188	2.62379	0.932908	-0.481678	0.0635136	0.00746042	0.0956505	2	5	1	0	Intron (uc002dll.3/57478, intron 1 of 15)	57478	ENSG00000103404	USP31	chr16	23147904	23148285
chr16|23494280|23495665	3.30247	2.65627	2.80248	2.28657	0.530361	0.216213	0.29352	0.00291713	0.0724397	5	7	0	0	Exon (uc002dlq.3/23062, exon 9 of 17)	23062	ENSG00000103365	GGA2	chr16	23494280	23495665
chr16|23510575|23511626	3.97121	2.00791	1.97692	2.20931	0.84598	-0.137906	-0.160345	0.00426794	0.0806584	1	9	2	0	Intron (uc002dlq.3/23062, intron 1 of 16)	23062	ENSG00000103365	GGA2	chr16	23510575	23511626
chr16|23566732|23567163	5.2149	3.3039	4.65012	5.14897	0.0183554	-0.640115	-0.147017	0.00427962	0.0807344	0	3	1	0	Promoter (1-2kb)	124454	ENSG00000103356	EARS2	chr16	23566732	23567163
chr16|23581562|23581964	4.39849	2.09097	3.66624	2.21478	0.989844	-0.0829938	0.727137	7.08565e-05	0.0606188	2	6	1	0	3' UTR	56061	ENSG00000103353	UBFD1	chr16	23581562	23581964
chr19|29383780|29384226	3.78332	2.28866	1.50045	1.40566	1.4284	0.703249	0.0941405	0.000145087	0.0606188	0	7	0	0	Distal Intergenic	148145	ENSG00000267339	LINC00906	chr19	29383780	29384226
chr16|24991123|24991416	5.41932	4.18082	5.55791	7.22056	-0.413999	-0.788324	-0.377568	0.00644786	0.0913722	1	2	0	0	Intron (uc002dnb.3/55114, intron 1 of 19)	55114	ENSG00000140750	ARHGAP17	chr16	24991123	24991416
chr16|25051493|25052041	2.19024	2.83045	1.50707	1.75149	0.3225	0.692444	-0.216841	0.00259483	0.0702553	9	7	0	2	Distal Intergenic	554206	ENSG00000262587	LOC554206	chr16	25051493	25052041
chr8|94277762|94278084	5.78713	1.8425	2.42849	2.17009	1.41509	-0.236094	0.162304	0.00189411	0.0651909	0	5	1	0	Distal Intergenic	389676	#N/A	C8orf87	chr8	94277762	94278084
chr16|26182829|26183278	4.12094	2.23681	2.29032	2.3754	0.794802	-0.0867283	-0.0526213	0.000629043	0.0606188	2	5	3	1	Distal Intergenic	9951	ENSG00000182601	HS3ST4	chr16	26182829	26183278
chr16|26209679|26210057	3.82304	2.21476	2.67916	3.06847	0.317203	-0.47037	-0.195739	0.00229312	0.0682	5	3	1	0	Distal Intergenic	9951	ENSG00000182601	HS3ST4	chr16	26209679	26210057
chr16|26211863|26212236	3.47659	2.3586	1.90197	2.03463	0.772909	0.213165	-0.0972718	0.00210577	0.0668634	6	2	1	1	Distal Intergenic	9951	ENSG00000182601	HS3ST4	chr16	26211863	26212236
chr16|26683919|26684243	5.05405	4.75444	2.5013	2.89009	0.806328	0.718161	-0.208437	0.00132549	0.0617746	0	4	1	1	Distal Intergenic	162083	ENSG00000234186	C16orf82	chr16	26683919	26684243
chr16|26754842|26755158	3.46546	2.33705	1.9579	2.29694	0.593333	0.0249738	-0.230404	0.0011918	0.0610486	0	4	1	0	Distal Intergenic	162083	ENSG00000234186	C16orf82	chr16	26754842	26755158
chr16|26764046|26764414	2.92919	1.85292	1.295	1.28307	1.1909	0.530195	0.0133504	2.26473e-05	0.0606188	0	1	1	0	Distal Intergenic	162083	ENSG00000234186	C16orf82	chr16	26764046	26764414
chr16|26871111|26871572	4.34735	2.93439	2.03065	1.86304	1.22247	0.6554	0.124277	0.00481503	0.0837833	1	9	2	3	Distal Intergenic	162083	ENSG00000234186	C16orf82	chr16	26871111	26871572
chr16|26990821|26991345	3.4675	2.65335	2.22069	2.35819	0.556218	0.170135	-0.0866729	0.00836107	0.0992504	4	6	2	1	Distal Intergenic	162083	ENSG00000234186	C16orf82	chr16	26990821	26991345
chr16|27044177|27044734	2.42436	3.4982	1.55275	2.01027	0.270217	0.799224	-0.372559	0.00508739	0.0850037	3	6	2	2	Distal Intergenic	162083	ENSG00000234186	C16orf82	chr16	27044177	27044734
chr8|102381052|102381425	6.48196	2.60885	2.96222	2.47839	1.38702	0.0740084	0.257274	0.00541172	0.0865949	2	2	1	0	Promoter (<=1kb)	83955	ENSG00000228224	NACAP1	chr8	102381052	102381425
chr16|27208467|27209288	3.14177	3.41678	4.22811	3.71593	-0.242146	-0.121087	0.18629	0.00216945	0.0671615	2	4	1	1	Distal Intergenic	79831	ENSG00000155666	KDM8	chr16	27208467	27209288
chr1|62813418|62814043	3.06099	1.9227	1.68481	1.71131	0.838898	0.168031	-0.0225101	0.00240718	0.069005	4	8	2	0	Distal Intergenic	163782	ENSG00000132854	KANK4	chr1	62813418	62814043
chr16|28583392|28584803	3.08278	3.78124	4.02293	4.13424	-0.423389	-0.128761	-0.0393759	0.00832337	0.0991269	8	10	3	4	Intron (uc002dqf.3/112869, intron 1 of 9)	112869	ENSG00000176476	SGF29	chr16	28583392	28584803
chr16|29267272|29270390	3.08171	2.88798	2.43941	2.23148	0.465728	0.372057	0.128531	0.00462396	0.0826682	6	9	2	2	Intron (uc010vct.2/uc010vct.2, intron 2 of 7)	440352	#N/A	SNX29P2	chr16	29267272	29270390
chr16|29685828|29686160	5.02581	2.47748	3.05688	3.49001	0.526125	-0.494356	-0.191173	0.000154792	0.0606188	3	3	1	0	Intron (uc010bzb.2/552900, intron 2 of 4)	23475	ENSG00000103485	QPRT	chr16	29685828	29686160
chr16|29943118|29943478	5.90773	2.59266	3.84713	3.11358	0.924029	-0.264143	0.305205	0.00503218	0.0847897	4	4	1	0	Intron (uc010bzb.2/552900, intron 2 of 4)	253980	ENSG00000174943	KCTD13	chr16	29943118	29943478
chr16|30186702|30188142	3.05916	2.0921	2.61441	2.20273	0.473847	-0.0743396	0.247197	0.00816683	0.0984975	8	6	2	0	Intron (uc010bzb.2/552900, intron 2 of 4)	11151	ENSG00000102879	CORO1A	chr16	30186702	30188142
chr16|30469800|30470461	3.62618	3.90865	2.36804	2.9042	0.320308	0.428529	-0.294449	0.0021203	0.0669652	4	9	0	3	Distal Intergenic	22928	ENSG00000179918	SEPHS2	chr16	30469800	30470461
chr16|30715906|30716554	3.72855	2.22621	2.91625	3.16974	0.234252	-0.509775	-0.120247	0.00429133	0.0807912	6	5	2	0	Promoter (<=1kb)	10847	ENSG00000080603	SRCAP	chr16	30715906	30716554
chr16|30879081|30879610	2.39154	1.88404	1.62145	1.40473	0.767652	0.423539	0.206999	0.00774594	0.0967707	1	8	1	0	Intron (uc021tgq.1/9274, intron 5 of 5)	100616231	ENSG00000265991	MIR4519	chr16	30879081	30879610
chr16|31237918|31238205	5.79618	3.41453	3.95876	2.91257	0.992809	0.229395	0.442753	0.0029493	0.0726152	0	3	0	0	Distal Intergenic	260434	ENSG00000169900	PYDC1	chr16	31237918	31238205
chr16|31282464|31283426	4.72636	4.15461	5.72657	4.96506	-0.0710829	-0.257099	0.20586	0.00366528	0.0770684	7	4	2	0	Exon (uc002ebq.3/3684, exon 7 of 30)	3684	ENSG00000169896	ITGAM	chr16	31282464	31283426
chr16|31491684|31492283	6.46332	7.87057	9.52344	10.0959	-0.643422	-0.359229	-0.084215	0.000568189	0.0606188	5	7	3	3	Promoter (2-3kb)	6524	ENSG00000140675	SLC5A2	chr16	31491684	31492283
chr16|31832376|31832993	4.6941	2.51291	3.39005	2.67374	0.811988	-0.0895053	0.342446	0.00381884	0.0779466	5	9	2	0	Distal Intergenic	10308	ENSG00000185947	ZNF267	chr16	31832376	31832993
chr16|4148393|4149230	2.1263	2.03301	1.29024	1.40336	0.59946	0.534731	-0.121252	0.00371238	0.0773275	2	8	0	1	Intron (uc002cvx.3/115, intron 2 of 10)	115	ENSG00000162104	ADCY9	chr16	4148393	4149230
chr1|64352166|64352514	3.53149	3.86633	5.2502	5.07225	-0.52235	-0.391662	0.0497465	0.00509664	0.0850037	6	4	1	0	Intron (uc001dbi.4/4919, intron 1 of 6)	4919	ENSG00000185483	ROR1	chr1	64352166	64352514
chr16|46991101|46991819	3.82892	3.15456	4.3796	3.70128	0.0489126	-0.230587	0.242776	0.00840654	0.0993068	4	10	2	0	Exon (uc002eeo.2/10294, exon 9 of 9)	10294	ENSG00000069345	DNAJA2	chr16	46991101	46991819
chr16|48431409|48431696	4.20807	2.49222	3.19697	3.17131	0.408079	-0.347646	0.0116283	0.00592617	0.0891068	0	3	0	0	Intron (uc002efl.3/6477, intron 2 of 6)	6477	ENSG00000196470	SIAH1	chr16	48431409	48431696
chr16|49486236|49487146	3.46166	5.21557	4.68693	5.12145	-0.565087	0.0262729	-0.127908	0.00704036	0.093878	2	3	2	1	Distal Intergenic	123970	ENSG00000166152	C16orf78	chr16	49486236	49487146
chr16|49582725|49583592	3.06926	2.66686	2.19406	1.99926	0.618426	0.415676	0.134137	0.00675908	0.0927523	3	7	1	2	Intron (uc010vgn.3/23090, intron 3 of 5)	23090	ENSG00000102935	ZNF423	chr16	49582725	49583592
chr16|49594055|49594526	2.95208	3.27959	4.40682	5.75632	-0.963414	-0.811633	-0.38541	0.0017951	0.0645693	4	6	2	3	Intron (uc010vgn.3/23090, intron 3 of 5)	23090	ENSG00000102935	ZNF423	chr16	49594055	49594526
chr1|65011859|65012179	5.58879	6.22514	7.56589	8.81524	-0.657464	-0.501893	-0.220489	0.00173276	0.0642481	0	4	1	0	Intron (uc001dbo.1/57685, intron 1 of 26)	57685	ENSG00000158966	CACHD1	chr1	65011859	65012179
chr16|50293281|50293628	6.90951	11.2468	10.9402	13.634	-0.980552	-0.277686	-0.31757	0.00523755	0.0856361	3	3	0	1	Distal Intergenic	113	ENSG00000121281	ADCY7	chr16	50293281	50293628
chr1|65063495|65063950	4.09636	2.15402	3.67349	3.50468	0.225063	-0.702247	0.0678709	0.00306752	0.0732733	0	3	1	0	Intron (uc001dbo.1/57685, intron 3 of 26)	100616338	ENSG00000264470	MIR4794	chr1	65063495	65063950
chr1|65068560|65068882	3.92137	2.75212	4.90766	4.41791	-0.172007	-0.682818	0.151673	0.00693905	0.0935231	0	4	1	0	5' UTR	100616338	ENSG00000264470	MIR4794	chr1	65068560	65068882
chr16|51206799|51207673	3.24418	2.84856	1.97124	2.16573	0.583	0.395379	-0.135747	0.000826125	0.0606188	5	12	2	0	Distal Intergenic	6299	ENSG00000103449	SALL1	chr16	51206799	51207673
chr16|51502296|51502648	5.11599	2.855	3.1505	3.72445	0.457986	-0.383536	-0.24145	0.00683918	0.093083	2	3	1	0	Distal Intergenic	6299	ENSG00000103449	SALL1	chr16	51502296	51502648
chr16|51686695|51686989	5.99676	9.73083	9.39067	10.0834	-0.749727	-0.0513483	-0.102682	0.00250958	0.0697463	1	2	0	1	Distal Intergenic	388276	#N/A	C16orf97	chr16	51686695	51686989
chr16|53584034|53586344	3.08364	4.25265	3.91029	3.87664	-0.330174	0.133555	0.0124699	0.00160336	0.0634516	7	10	4	3	Distal Intergenic	64400	ENSG00000166971	AKTIP	chr16	53584034	53586344
chr16|53658011|53658323	4.02092	2.07148	3.86743	3.86979	0.0552693	-0.901597	-0.000881724	0.00475626	0.083391	0	3	0	0	Intron (uc002eho.4/23322, intron 21 of 24)	23322	ENSG00000103494	RPGRIP1L	chr16	53658011	53658323
chr16|5389529|5389854	5.69116	6.53737	3.95811	4.21595	0.432864	0.632852	-0.0910472	0.00141234	0.0622946	0	3	1	1	Intron (uc002cyq.1/uc002cyq.1, intron 1 of 2)	196483	ENSG00000118894	EEF2KMT	chr16	5389529	5389854
chr16|54029413|54029771	6.55704	9.00824	10.3519	10.5544	-0.686734	-0.228534	-0.027957	0.00660166	0.0920116	5	3	1	0	Intron (uc002ehr.3/79068, intron 8 of 8)	79068	ENSG00000140718	FTO	chr16	54029413	54029771
chr16|54242133|54242610	2.95536	3.84238	4.63878	5.68779	-0.944533	-0.565869	-0.294124	0.00156407	0.0632277	9	4	0	3	Distal Intergenic	79191	ENSG00000177508	IRX3	chr16	54242133	54242610
chr16|54441826|54442239	4.04975	4.07329	5.35347	5.48546	-0.43778	-0.429417	-0.0351379	0.00263552	0.0705373	4	5	1	0	Distal Intergenic	79191	ENSG00000177508	IRX3	chr16	54441826	54442239
chr16|54580201|54580551	4.36809	6.76786	8.07358	9.12607	-1.06299	-0.431294	-0.176784	0.000188483	0.0606188	5	1	1	0	Distal Intergenic	79191	ENSG00000177508	IRX3	chr16	54580201	54580551
chr1|65485320|65485834	3.47939	2.8107	3.96941	3.33565	0.0608684	-0.247038	0.250958	0.00474761	0.0832931	0	2	1	0	Distal Intergenic	100500854	ENSG00000265996	MIR3671	chr1	65485320	65485834
chr16|55116200|55116843	2.2817	3.1174	3.46646	3.97115	-0.799447	-0.349215	-0.196097	0.00182836	0.0647413	6	2	0	0	Distal Intergenic	10265	ENSG00000176842	IRX5	chr16	55116200	55116843
chr16|55185677|55186206	4.62615	4.71887	6.28867	6.44211	-0.47772	-0.449091	-0.0347779	0.00209518	0.0667607	8	8	2	1	Distal Intergenic	79190	ENSG00000159387	IRX6	chr16	55185677	55186206
chr16|55222882|55225727	3.58675	5.22794	5.06408	5.45235	-0.604201	-0.0606355	-0.106577	0.00365193	0.0770554	12	14	4	4	Distal Intergenic	79190	ENSG00000159387	IRX6	chr16	55222882	55225727
chr16|5713967|5714474	3.58524	2.13741	2.31391	2.28402	0.650492	-0.0957134	0.0187546	0.00394446	0.0787074	1	7	1	2	Distal Intergenic	54715	ENSG00000078328	RBFOX1	chr16	5713967	5714474
chr16|57490265|57491154	4.41039	4.10089	6.06767	5.09938	-0.209415	-0.314384	0.250821	0.00118197	0.0610486	7	4	4	1	Promoter (<=1kb)	57017	ENSG00000088682	COQ9	chr16	57490265	57491154
chr16|57493395|57494062	2.17	2.69656	3.78573	3.35379	-0.628099	-0.314671	0.17478	0.00506892	0.0849445	8	4	0	3	Promoter (1-2kb)	57017	ENSG00000088682	COQ9	chr16	57493395	57494062
chr1|6606696|6606992	3.12576	2.7109	4.17293	4.92136	-0.654849	-0.860286	-0.237996	0.00367197	0.0770802	0	2	0	0	Intron (uc001ans.3/79707, intron 3 of 11)	79707	ENSG00000162408	NOL9	chr1	6606696	6606992
chr16|62054835|62055366	5.44255	6.54657	7.58477	7.86838	-0.531783	-0.265327	-0.0529619	0.00467048	0.0829058	8	9	1	3	5' UTR	1006	ENSG00000150394	CDH8	chr16	62054835	62055366
chr16|62485580|62486171	5.18571	7.86616	7.47259	7.57924	-0.54751	0.053606	-0.0204444	0.00667991	0.0924081	1	3	1	1	Distal Intergenic	1006	ENSG00000150394	CDH8	chr16	62485580	62486171
chr1|66301715|66302229	5.03669	4.19625	6.23558	6.53476	-0.375657	-0.639034	-0.0676103	0.00740659	0.0953269	5	5	1	0	Intron (uc001dcn.3/5142, intron 1 of 16)	5142	ENSG00000184588	PDE4B	chr1	66301715	66302229
chr16|64331174|64332417	3.26019	4.31354	4.41953	4.71313	-0.531731	-0.127813	-0.0927919	0.00770749	0.0965715	4	5	4	2	Distal Intergenic	1009	ENSG00000140937	CDH11	chr16	64331174	64332417
chr16|64606876|64607606	2.36242	2.20322	1.4256	1.73789	0.442926	0.342275	-0.28577	0.00222177	0.0676526	3	10	1	2	Distal Intergenic	1009	ENSG00000140937	CDH11	chr16	64606876	64607606
chr16|65809956|65810277	4.71022	2.28212	3.49571	2.39142	0.977929	-0.0674895	0.547718	0.00468965	0.083034	0	3	0	0	Distal Intergenic	283867	ENSG00000261742	LINC00922	chr16	65809956	65810277
chr16|66280918|66282674	3.06925	3.48028	4.06421	4.64493	-0.59777	-0.416456	-0.192683	0.000533288	0.0606188	5	12	4	3	Distal Intergenic	1003	ENSG00000179776	CDH5	chr16	66280918	66282674
chr16|66299933|66301378	3.11686	4.52944	4.42344	5.48943	-0.816562	-0.277323	-0.311487	0.00300509	0.0729686	5	3	0	3	Distal Intergenic	1003	ENSG00000179776	CDH5	chr16	66299933	66301378
chr16|66859067|66859543	3.66293	2.08333	4.02973	3.46806	0.0788695	-0.735238	0.216554	0.00376352	0.0776896	3	4	1	0	Intron (uc002eqe.3/8883, intron 4 of 20)	8883	ENSG00000159593	NAE1	chr16	66859067	66859543
chr16|67167277|67167609	3.26576	2.42674	4.1156	3.37538	-0.0476347	-0.476034	0.286052	0.00789808	0.0974389	2	1	1	0	Intron (uc002erc.3/80262, intron 7 of 16)	80262	ENSG00000125149	C16orf70	chr16	67167277	67167609
chr16|6737713|6738115	4.29805	3.68238	2.65449	2.8542	0.590596	0.367552	-0.104653	0.00697687	0.0936351	3	7	1	3	Intron (uc002cyr.1/54715, intron 3 of 11)	54715	ENSG00000078328	RBFOX1	chr16	6737713	6738115
chr16|6744855|6745664	2.66999	2.24038	1.6502	1.69293	0.65731	0.40422	-0.0368807	0.00518073	0.0854381	1	3	1	1	Intron (uc002cyr.1/54715, intron 3 of 11)	54715	ENSG00000078328	RBFOX1	chr16	6744855	6745664
chr16|67654859|67655205	5.21246	2.35282	5.07702	4.22771	0.302089	-0.845486	0.264106	0.00334864	0.0749895	4	3	1	0	Intron (uc002etl.3/10664, intron 6 of 11)	10664	ENSG00000102974	CTCF	chr16	67654859	67655205
chr16|67848080|67848839	4.53604	5.05974	6.74379	5.55923	-0.293452	-0.135822	0.278676	0.00474761	0.0832931	7	6	3	0	5' UTR	55815	ENSG00000102904	TSNAXIP1	chr16	67848080	67848839
chr16|6799136|6799463	5.24182	3.46944	3.03812	2.44627	1.09948	0.504116	0.312593	0.00212127	0.0669652	0	5	1	1	Intron (uc002cyr.1/54715, intron 3 of 11)	54715	ENSG00000078328	RBFOX1	chr16	6799136	6799463
chr16|68387123|68387806	4.42665	3.70974	6.04816	5.49562	-0.312065	-0.566962	0.138214	0.00716257	0.0944134	3	5	3	0	Promoter (1-2kb)	54496	ENSG00000132600	PRMT7	chr16	68387123	68387806
chr16|69489091|69489405	4.33965	2.41738	4.91555	5.07068	-0.224601	-1.06874	-0.0448264	0.0033046	0.0747097	0	3	0	0	Intron (uc002exg.1/80777, intron 3 of 4)	80777	ENSG00000103018	CYB5B	chr16	69489091	69489405
chr16|70119875|70120220	4.81429	3.52135	5.85321	5.81751	-0.273077	-0.724271	0.00882628	0.00514319	0.0853475	0	2	1	0	Intron (uc002exy.4/283971, intron 4 of 12)	283970	ENSG00000196696	PDXDC2P-NPIPB14P	chr16	70119875	70120220
chr1|67021882|67022254	5.21478	5.29064	7.15724	6.19042	-0.247431	-0.226594	0.209366	0.00724739	0.0948239	1	2	1	1	Intron (uc001dcr.3/84251, intron 1 of 24)	84251	ENSG00000118473	SGIP1	chr1	67021882	67022254
chr16|70383139|70383472	6.03105	5.0605	7.39408	7.26614	-0.268779	-0.52191	0.025182	0.007767	0.0968566	2	4	1	0	Promoter (2-3kb)	55308	ENSG00000168872	DDX19A	chr16	70383139	70383472
chr16|70852296|70852911	3.41784	4.06658	5.61292	4.69784	-0.458912	-0.208181	0.256756	0.000595088	0.0606188	3	4	2	1	Exon (uc010cfy.4/54768, exon 19 of 22)	55697	ENSG00000103043	VAC14	chr16	70852296	70852911
chr16|71378304|71379455	3.85112	4.83309	5.12964	5.65404	-0.554001	-0.226336	-0.140423	0.00212907	0.0670364	1	3	0	4	Distal Intergenic	794	ENSG00000172137	CALB2	chr16	71378304	71379455
chr16|71799097|71799443	3.66922	1.75718	3.41461	2.52847	0.537208	-0.525004	0.433454	0.00308297	0.0733986	3	2	1	0	Exon (uc021tky.1/164, exon 7 of 23)	692111	ENSG00000223224	SNORD71	chr16	71799097	71799443
chr16|72806438|72806898	4.15375	2.47089	4.8689	4.08178	0.025218	-0.724166	0.254399	0.00480409	0.0837133	4	8	2	0	Intron (uc002fcj.1/uc002fcj.1, intron 4 of 6)	463	ENSG00000140836	ZFHX3	chr16	72806438	72806898
chr16|72841647|72841985	4.8079	2.36352	5.14287	4.38638	0.132379	-0.89209	0.229546	0.00700854	0.0937297	2	2	1	0	Intron (uc002fck.3/463, intron 7 of 9)	463	ENSG00000140836	ZFHX3	chr16	72841647	72841985
chr16|73177331|73177664	6.88375	7.69871	11.1727	12.3558	-0.843923	-0.6825	-0.145205	0.00802046	0.0978443	3	4	1	1	Distal Intergenic	283902	ENSG00000260880	HCCAT5	chr16	73177331	73177664
chr16|73805207|73806178	2.72339	2.74197	1.57683	1.8349	0.5697	0.579514	-0.218675	0.00317298	0.0739441	3	7	0	3	Distal Intergenic	100506172	ENSG00000258779	LINC01568	chr16	73805207	73806178
chr16|74465506|74466247	3.79623	4.25683	5.45826	4.6904	-0.305145	-0.139933	0.218729	0.00491459	0.0842064	6	6	1	0	Distal Intergenic	497190	ENSG00000140839	CLEC18B	chr16	74465506	74466247
chr16|74638867|74639181	3.3664	3.61842	5.09192	6.14374	-0.867908	-0.763758	-0.270908	0.0029238	0.0725448	1	4	0	1	Promoter (1-2kb)	2734	ENSG00000090863	GLG1	chr16	74638867	74639181
chr16|75333094|75334279	4.43213	4.29495	6.12936	5.24983	-0.244271	-0.289629	0.223465	0.00461976	0.0826337	4	7	2	0	Intron (uc002fdy.3/10428, intron 6 of 6)	9564	ENSG00000050820	BCAR1	chr16	75333094	75334279
chr16|75879749|75880315	5.3827	2.57985	4.49367	4.25399	0.339513	-0.72153	0.0790768	0.00700854	0.0937297	3	9	1	0	Distal Intergenic	3735	ENSG00000065427	KARS	chr16	75879749	75880315
chr1|67647907|67648365	4.66954	4.5213	6.10478	4.90727	-0.0716393	-0.118184	0.315017	0.0054413	0.0867582	4	2	1	0	Promoter (<=1kb)	149233	ENSG00000162594	IL23R	chr1	67647907	67648365
chr16|7659910|7660585	4.36116	7.90629	6.56226	6.77731	-0.636	0.222287	-0.0465202	0.00305912	0.0732292	3	6	3	4	Intron (uc002cyr.1/54715, intron 10 of 11)	54715	ENSG00000078328	RBFOX1	chr16	7659910	7660585
chr16|77427830|77428316	2.26163	1.90448	1.453	1.39063	0.701631	0.453663	0.0632965	0.00807139	0.0980484	5	6	0	1	Intron (uc002ffc.4/170692, intron 3 of 22)	170692	ENSG00000140873	ADAMTS18	chr16	77427830	77428316
chr16|77793827|77794164	5.27436	3.54136	6.19361	7.41879	-0.492187	-1.06688	-0.260403	0.00296688	0.0727415	1	2	1	0	Distal Intergenic	57687	ENSG00000171724	VAT1L	chr16	77793827	77794164
chr16|78023388|78024211	2.93955	4.48228	3.82854	4.84243	-0.720136	-0.111497	-0.338937	0.00730338	0.0950277	8	5	2	1	Distal Intergenic	10143	ENSG00000166509	CLEC3A	chr16	78023388	78024211
chr16|78310971|78311669	5.50865	6.16191	8.51016	9.02588	-0.712368	-0.55069	-0.0848814	0.00487896	0.0840277	4	6	4	3	Intron (uc002ffj.2/51741, intron 5 of 5)	51741	ENSG00000186153	WWOX	chr16	78310971	78311669
chr16|78703988|78704266	4.16144	5.26739	6.83464	7.60216	-0.869326	-0.529321	-0.153545	0.000971326	0.0606188	1	2	0	1	Intron (uc002ffk.3/51741, intron 8 of 8)	51741	ENSG00000186153	WWOX	chr16	78703988	78704266
chr16|79079676|79080476	3.43571	2.65668	2.37391	2.12193	0.695234	0.324252	0.161893	0.00379454	0.0778392	9	11	2	1	Intron (uc002ffk.3/51741, intron 8 of 8)	4094	ENSG00000178573	MAF	chr16	79079676	79080476
chr16|79290178|79290805	4.2808	2.36299	3.04428	2.58419	0.728165	-0.129101	0.236387	0.00648303	0.0915769	3	9	2	0	Distal Intergenic	4094	ENSG00000178573	MAF	chr16	79290178	79290805
chr16|79577217|79577677	4.20249	2.15752	3.39197	3.35601	0.324498	-0.637376	0.0153751	0.00300372	0.0729686	4	8	2	0	Distal Intergenic	4094	ENSG00000178573	MAF	chr16	79577217	79577677
chr16|80039840|80040477	3.60474	4.09216	5.6644	6.36256	-0.819713	-0.636747	-0.167684	0.000432374	0.0606188	11	4	2	2	Distal Intergenic	4094	ENSG00000178573	MAF	chr16	80039840	80040477
chr16|81197740|81198100	3.21957	2.15721	2.01092	2.42364	0.409695	-0.168005	-0.269316	0.00364527	0.0769697	0	1	1	0	Intron (uc002fgg.1/114780, intron 9 of 31)	114780	ENSG00000166473	PKD1L2	chr16	81197740	81198100
chr16|81402885|81403291	4.86581	1.99844	3.9555	3.3902	0.521308	-0.762496	0.222487	0.00341346	0.075377	5	6	1	0	Intron (uc002fgo.3/8139, intron 9 of 10)	100616150	ENSG00000284473	MIR4720	chr16	81402885	81403291
chr16|81509514|81510156	4.52032	2.14381	4.20096	3.22478	0.487225	-0.589023	0.381519	0.000988037	0.0606188	4	5	1	0	Intron (uc002fgp.3/80790, intron 1 of 20)	80790	ENSG00000153815	CMIP	chr16	81509514	81510156
chr16|8159212|8159766	4.24356	2.1818	2.55055	2.57879	0.718579	-0.241178	-0.0158884	0.00190282	0.0652776	2	6	1	1	Distal Intergenic	283953	ENSG00000232258	TMEM114	chr16	8159212	8159766
chr1|222379785|222380158	3.22732	3.13158	2.50427	1.23435	1.38659	1.34314	1.02065	0.00382581	0.0779609	2	2	0	1	Distal Intergenic	79802	ENSG00000143512	HHIPL2	chr1	222379785	222380158
chr16|81597822|81598530	4.85424	4.58166	7.37448	6.41354	-0.401873	-0.48525	0.201421	0.00632049	0.0909556	6	2	3	1	Intron (uc002fgp.3/80790, intron 1 of 20)	80790	ENSG00000153815	CMIP	chr16	81597822	81598530
chr16|81643344|81644664	3.29156	4.85047	5.36054	5.55469	-0.754935	-0.195584	-0.0513306	0.0068021	0.0929266	9	9	2	3	Promoter (<=1kb)	80790	ENSG00000153815	CMIP	chr16	81643344	81644664
chr16|81645948|81646735	2.78872	3.15414	4.765	4.39622	-0.656663	-0.479018	0.116211	0.000208989	0.0606188	4	3	2	1	Promoter (2-3kb)	80790	ENSG00000153815	CMIP	chr16	81645948	81646735
chr16|81725465|81728745	3.11848	3.55385	4.1243	4.08736	-0.390323	-0.201785	0.0129796	0.00854441	0.0998241	9	10	4	1	Exon (uc002fgp.3/80790, exon 12 of 21)	100129617	#N/A	LOC100129617	chr16	81725465	81728745
chr16|81909448|81909755	5.46264	4.33727	6.80636	8.15989	-0.578952	-0.911762	-0.261666	0.00151805	0.0629717	1	3	0	0	Intron (uc002fgt.3/5336, intron 7 of 32)	5336	ENSG00000197943	PLCG2	chr16	81909448	81909755
chr16|81968793|81969189	4.56136	2.97872	5.90147	5.90211	-0.371766	-0.986539	-0.000156153	0.00165575	0.0637323	5	5	1	0	Intron (uc002fgt.3/5336, intron 26 of 32)	93517	ENSG00000184860	SDR42E1	chr16	81968793	81969189
chr16|83115698|83116172	3.68401	2.94817	1.97653	2.13914	0.784246	0.462788	-0.114058	0.00595312	0.0892726	7	10	2	1	Intron (uc010chh.3/1012, intron 3 of 4)	100422853	ENSG00000263785	MIR3182	chr16	83115698	83116172
chr16|83719378|83719760	3.92303	1.79198	2.47372	2.64624	0.568024	-0.562394	-0.097263	0.0032197	0.0742124	6	6	1	0	Intron (uc002fgx.3/1012, intron 10 of 13)	3281	ENSG00000230989	HSBP1	chr16	83719378	83719760
chr16|83765786|83766147	5.1976	5.19699	8.14961	6.83028	-0.3941	-0.394269	0.254786	0.000471717	0.0606188	3	0	1	0	Intron (uc002fgx.3/1012, intron 10 of 13)	3281	ENSG00000230989	HSBP1	chr16	83765786	83766147
chr1|68411429|68411872	3.2338	2.1099	1.96279	2.08662	0.632062	0.016002	-0.0882646	0.00278676	0.0716515	4	7	0	0	Intron (uc001deb.2/100289178, intron 1 of 9)	9077	ENSG00000162595	DIRAS3	chr1	68411429	68411872
chr16|84695114|84695819	4.23548	2.31099	4.61563	2.86265	0.565172	-0.30884	0.689177	0.00451377	0.0820446	7	8	3	0	3' UTR	79786	ENSG00000135686	KLHL36	chr16	84695114	84695819
chr16|85029087|85029374	4.39783	2.99973	2.27126	2.39392	0.877417	0.325459	-0.075886	0.00116629	0.0610212	1	3	0	0	Intron (uc002fiq.2/55625, intron 2 of 7)	55625	ENSG00000153786	ZDHHC7	chr16	85029087	85029374
chr16|8545625|8546194	3.16061	3.17777	2.0881	2.01612	0.648622	0.656433	0.0506104	0.00312266	0.0736272	5	7	1	1	Distal Intergenic	283953	ENSG00000232258	TMEM114	chr16	8545625	8546194
chr16|86097636|86098280	4.37995	3.86305	2.88255	2.55697	0.776479	0.595302	0.17291	0.00752826	0.0959331	5	6	1	3	Distal Intergenic	3394	ENSG00000140968	IRF8	chr16	86097636	86098280
chr16|86256234|86256672	5.26112	7.62985	8.34034	10.0979	-0.940607	-0.404322	-0.275871	0.0063119	0.0909	8	9	2	4	Distal Intergenic	146513	ENSG00000268532	LINC02135	chr16	86256234	86256672
chr16|86577383|86577814	3.80642	2.4036	4.91231	3.67378	0.0511689	-0.612072	0.419135	0.00833843	0.099237	8	7	2	0	Intron (uc002fjm.3/64779, intron 5 of 7)	64779	ENSG00000103248	MTHFSD	chr16	86577383	86577814
chr16|86604537|86606901	4.14993	6.07426	5.78719	6.23036	-0.586227	-0.0366057	-0.106451	0.00838378	0.0993068	8	10	3	5	Distal Intergenic	2303	ENSG00000176692	FOXC2	chr16	86604537	86606901
chr16|86691662|86692136	3.0672	3.93546	2.33628	2.36815	0.373165	0.732774	-0.0195467	0.00460716	0.0825983	1	10	1	5	Distal Intergenic	2300	ENSG00000176678	FOXL1	chr16	86691662	86692136
chr16|86887828|86888138	4.28688	5.89261	7.55009	7.94682	-0.89045	-0.43147	-0.0738848	0.000437208	0.0606188	1	1	0	1	Distal Intergenic	2300	ENSG00000176678	FOXL1	chr16	86887828	86888138
chr16|87039784|87041079	2.20165	2.46958	1.68816	1.6341	0.430088	0.595769	0.0469575	0.00344633	0.075648	4	11	2	2	Distal Intergenic	100506581	ENSG00000260456	C16orf95	chr16	87039784	87041079
chr16|87169230|87169583	5.11466	3.38694	5.58376	2.92604	0.80569	0.211037	0.932289	0.00663766	0.0922263	4	3	1	0	Intron (uc002fjt.1/uc002fjt.1, intron 4 of 4)	100506581	ENSG00000260456	C16orf95	chr16	87169230	87169583
chr16|87536832|87537312	2.99976	2.4591	4.06876	3.03309	-0.0159401	-0.302659	0.423802	0.00481284	0.0837833	7	4	0	1	Intron (uc002fkc.2/uc002fkc.2, intron 1 of 3)	23174	ENSG00000140948	ZCCHC14	chr16	87536832	87537312
chr16|8787058|8787420	5.99513	2.33934	5.56175	4.5796	0.388569	-0.969124	0.280316	0.00636075	0.0910874	5	5	1	0	Intron (uc002czc.4/18, intron 1 of 15)	18	ENSG00000183044	ABAT	chr16	8787058	8787420
chr16|87973453|87975179	3.11542	2.07115	3.13968	2.8316	0.137811	-0.451185	0.149001	0.0075624	0.0959913	6	10	2	0	Distal Intergenic	763	ENSG00000174990	CA5A	chr16	87973453	87975179
chr16|88096021|88097638	3.37423	3.8144	5.06185	5.67169	-0.74922	-0.572324	-0.164114	0.00057773	0.0606188	3	5	2	1	Intron (uc002fkp.3/54971, intron 10 of 12)	54971	ENSG00000172530	BANP	chr16	88096021	88097638
chr16|89565073|89565439	6.94907	7.20305	10.6426	10.2661	-0.562997	-0.511208	0.0519654	0.0018017	0.0646027	7	5	1	0	Distal Intergenic	29123	ENSG00000167522	ANKRD11	chr16	89565073	89565439
chr16|9051537|9052764	2.44443	2.44432	1.49301	1.91536	0.351881	0.35182	-0.359395	0.00224736	0.0678268	0	10	0	2	Promoter (1-2kb)	7874	ENSG00000187555	USP7	chr16	9051537	9052764
chr16|9096764|9097358	4.96171	2.95614	2.67326	2.51518	0.980174	0.233052	0.0879393	0.00187423	0.0651239	3	12	1	0	Distal Intergenic	7874	ENSG00000187555	USP7	chr16	9096764	9097358
chr1|6911928|6912776	3.32202	2.05481	3.23017	2.57411	0.367989	-0.325065	0.327539	0.00455297	0.0822585	5	8	2	0	Intron (uc001aoh.3/23261, intron 3 of 3)	23261	ENSG00000171735	CAMTA1	chr1	6911928	6912776
chr1|6993882|6994711	5.20085	7.50589	7.26894	7.49038	-0.52629	0.00298509	-0.043294	0.00660166	0.0920116	2	6	2	3	Intron (uc001aoi.3/23261, intron 3 of 22)	23261	ENSG00000171735	CAMTA1	chr1	6993882	6994711
chr1|70702173|70702766	3.12749	2.22791	3.5114	3.36796	-0.10687	-0.596182	0.0601713	0.00807139	0.0980484	2	4	1	0	Intron (uc001des.3/9295, intron 6 of 12)	9295	ENSG00000116754	SRSF11	chr1	70702173	70702766
chr1|70982633|70982926	4.31793	2.45737	5.42111	5.19231	-0.266037	-1.07926	0.0622127	0.00270143	0.0709375	1	2	0	0	Distal Intergenic	1491	ENSG00000116761	CTH	chr1	70982633	70982926
chr17|10009440|10009779	5.08497	7.39343	7.70551	7.73372	-0.604922	-0.0649192	-0.00527232	0.00359736	0.0766115	2	2	1	1	Intron (uc010coh.1/8522, intron 1 of 14)	8522	ENSG00000007237	GAS7	chr17	10009440	10009779
chr17|10044486|10045458	2.51938	2.88999	1.97477	2.15957	0.222322	0.420318	-0.129062	0.00672547	0.092634	8	10	2	1	Intron (uc002gmg.1/8522, intron 1 of 13)	8522	ENSG00000007237	GAS7	chr17	10044486	10045458
chr17|10280|15892	2.67174	3.74057	3.40599	3.25606	-0.285347	0.200131	0.064947	0.00471961	0.083165	8	9	4	4	Exon (uc010vpx.1/8447, exon 3 of 6)	8447	ENSG00000272636	DOC2B	chr17	10280	15892
chr17|10552151|10553376	3.01435	3.48838	4.20903	3.96389	-0.395068	-0.18436	0.086571	0.00370562	0.0773275	4	7	3	0	Exon (uc002gmq.2/4621, exon 7 of 41)	4621	ENSG00000109063	MYH3	chr17	10552151	10553376
chr17|10778974|10779544	3.84402	8.34278	7.11337	7.9588	-1.04994	0.0679765	-0.162019	0.00272003	0.0710759	6	3	3	5	Distal Intergenic	644139	ENSG00000233670	PIRT	chr17	10778974	10779544
chr17|11806208|11806951	3.59573	2.46774	4.94672	3.55884	0.0148797	-0.528217	0.475064	0.000783051	0.0606188	6	5	3	0	Exon (uc002gne.3/1770, exon 60 of 69)	1770	ENSG00000007174	DNAH9	chr17	11806208	11806951
chr17|12659161|12659834	4.39523	3.3086	5.76591	5.43463	-0.306243	-0.715961	0.0853677	0.00250384	0.0696973	4	2	2	0	Exon (uc002gno.2/93649, exon 11 of 14)	93649	ENSG00000141052	MYOCD	chr17	12659161	12659834
chr17|12681103|12681845	3.23511	3.57619	4.80995	4.71044	-0.542046	-0.397437	0.03016	0.000687419	0.0606188	3	7	3	0	Distal Intergenic	9912	ENSG00000006740	ARHGAP44	chr17	12681103	12681845
chr17|12754465|12754876	5.82122	2.73043	6.60385	4.38483	0.408802	-0.683392	0.590787	0.00722118	0.094682	6	5	1	0	Intron (uc002gnr.4/9912, intron 1 of 20)	9912	ENSG00000006740	ARHGAP44	chr17	12754465	12754876
chr17|13059763|13060424	4.99809	4.66855	7.37957	7.77892	-0.638193	-0.736596	-0.0760338	0.000806905	0.0606188	11	6	4	0	Distal Intergenic	60528	ENSG00000006744	ELAC2	chr17	13059763	13060424
chr17|14413489|14414064	2.80075	2.24898	3.76491	4.08866	-0.545818	-0.862358	-0.119016	0.000481873	0.0606188	6	3	1	0	Distal Intergenic	84815	ENSG00000266709	MGC12916	chr17	14413489	14414064
chr17|14525523|14525912	4.20413	3.72375	6.28151	5.42626	-0.368152	-0.543203	0.211153	0.00615918	0.0902437	6	6	1	2	Distal Intergenic	84815	ENSG00000266709	MGC12916	chr17	14525523	14525912
chr17|14590480|14590821	3.70932	4.10987	4.87765	6.70613	-0.854325	-0.706389	-0.459294	0.00595853	0.0892726	2	3	1	0	Distal Intergenic	94150	ENSG00000259944	CDRT7	chr17	14590480	14590821
chr17|14707309|14707670	4.91011	4.96011	9.66512	11.1496	-1.18317	-1.16855	-0.206137	0.000110923	0.0606188	3	4	0	0	Distal Intergenic	94150	ENSG00000259944	CDRT7	chr17	14707309	14707670
chr17|14929242|14929566	4.75078	2.61741	5.04958	6.35892	-0.420617	-1.28064	-0.332618	0.00664669	0.0922524	0	1	1	0	Distal Intergenic	94150	ENSG00000259944	CDRT7	chr17	14929242	14929566
chr17|14962731|14963168	4.09771	4.14981	5.79147	6.7138	-0.712311	-0.694086	-0.213202	0.00565803	0.087777	8	7	0	1	Distal Intergenic	94150	ENSG00000259944	CDRT7	chr17	14962731	14963168
chr17|15324451|15325789	2.37623	3.30044	3.35588	2.9284	-0.30144	0.172546	0.196579	0.000408796	0.0606188	2	3	2	0	Distal Intergenic	284040	ENSG00000239704	CDRT4	chr17	15324451	15325789
chr17|15346862|15347890	4.05732	2.82198	5.29783	3.94898	0.0390475	-0.484774	0.42392	0.00204676	0.0664291	6	8	3	0	Intron (uc002gop.2/284040, intron 2 of 3)	284040	ENSG00000239704	CDRT4	chr17	15346862	15347890
chr17|15366572|15367282	3.73551	3.80268	5.27015	4.97666	-0.41387	-0.388161	0.0826664	0.0084752	0.0995851	0	2	1	1	Intron (uc002gop.2/284040, intron 1 of 3)	284040	ENSG00000239704	CDRT4	chr17	15366572	15367282
chr17|15508487|15509040	3.45025	3.08732	4.8302	4.04997	-0.23121	-0.391557	0.254171	0.00531185	0.0861185	3	2	1	0	Promoter (1-2kb)	374286	ENSG00000241322	CDRT1	chr17	15508487	15509040
chr17|15563045|15563936	3.2813	3.87537	4.5251	4.63772	-0.499149	-0.259082	-0.0354658	0.00663465	0.0922263	3	5	3	3	Intron (uc002gox.3/10626, intron 3 of 8)	10626	ENSG00000221926	TRIM16	chr17	15563045	15563936
chr17|16373304|16373943	4.11024	4.90051	6.36362	6.82043	-0.730641	-0.476933	-0.100015	0.00737982	0.0953051	2	4	0	2	Exon (uc010cpe.2/125144, exon 7 of 7)	388341	ENSG00000181350	LRRC75A	chr17	16373304	16373943
chr17|16387113|16389985	2.70509	3.66686	3.56402	3.98941	-0.560501	-0.121633	-0.162671	0.00436027	0.081178	8	9	1	5	Intron (uc002gqh.3/388341, intron 1 of 2)	388341	ENSG00000181350	LRRC75A	chr17	16387113	16389985
chr17|16757023|16759993	2.70728	3.65902	3.93997	3.53965	-0.38676	0.0478495	0.154579	0.00770749	0.0965715	12	9	4	4	Distal Intergenic	400578	#N/A	KRT16P2	chr17	16757023	16759993
chr17|16923456|16925710	3.51957	4.98304	5.28866	5.02423	-0.513502	-0.0118779	0.0739982	0.000586888	0.0606188	8	11	3	3	Distal Intergenic	23164	ENSG00000133030	MPRIP	chr17	16923456	16925710
chr17|16958704|16959778	3.41447	5.15366	5.3044	5.2823	-0.629504	-0.0355689	0.00602184	0.00764498	0.0963775	11	6	1	4	Intron (uc002gqu.2/23164, intron 1 of 23)	23164	ENSG00000133030	MPRIP	chr17	16958704	16959778
chr17|16978831|16979732	3.09783	4.10947	4.52955	4.33305	-0.484125	-0.0764296	0.0639831	0.00192389	0.0653825	5	8	1	4	Exon (uc002gqu.2/23164, exon 2 of 24)	23164	ENSG00000133030	MPRIP	chr17	16978831	16979732
chr17|17009501|17009883	4.44561	2.25326	3.26406	2.72405	0.70663	-0.273737	0.260915	0.00742001	0.0954395	3	5	0	0	Intron (uc002gqu.2/23164, intron 3 of 23)	23164	ENSG00000133030	MPRIP	chr17	17009501	17009883
chr17|17080333|17080721	6.27646	5.05433	8.37343	5.79469	0.115222	-0.19721	0.531089	0.00687024	0.0932294	3	5	1	1	Exon (uc002gqu.2/23164, exon 21 of 24)	23164	ENSG00000133030	MPRIP	chr17	17080333	17080721
chr17|17087674|17087983	5.4662	4.77364	7.18698	5.41934	0.012423	-0.183025	0.40727	0.00709156	0.0940771	0	4	0	0	Intron (uc002gqu.2/23164, intron 23 of 23)	23164	ENSG00000133030	MPRIP	chr17	17087674	17087983
chr17|17477409|17478191	3.47189	2.70929	4.6703	4.44971	-0.357989	-0.715795	0.0698031	0.00244943	0.0692879	6	5	1	0	Promoter (2-3kb)	10400	ENSG00000133027	PEMT	chr17	17477409	17478191
chr17|17568153|17569671	3.81757	4.85241	5.6447	5.97434	-0.646126	-0.30008	-0.0818824	0.00632623	0.0909591	6	5	3	3	Distal Intergenic	10743	ENSG00000108557	RAI1	chr17	17568153	17569671
chr17|17793640|17794036	4.41379	2.31293	4.4874	2.96896	0.572059	-0.360238	0.59592	0.00842936	0.0993934	8	7	1	0	Intron (uc002gry.4/146691, intron 3 of 13)	6720	ENSG00000072310	SREBF1	chr17	17793640	17794036
chr17|1787343|1788343	1.77282	2.14258	2.44257	2.24008	-0.337502	-0.064205	0.124848	0.00620123	0.0904543	6	2	2	0	Intron (uc002fto.2/6117, intron 13 of 16)	6117	ENSG00000132383	RPA1	chr17	1787343	1788343
chr17|17891390|17891816	5.079	3.86331	6.89515	4.64069	0.130204	-0.264501	0.571242	0.00266705	0.0707141	7	8	4	0	Exon (uc010vxe.2/83450, exon 6 of 14)	83450	ENSG00000171962	DRC3	chr17	17891390	17891816
chr17|17990603|17991111	3.97968	5.70409	5.30676	5.19055	-0.383234	0.13611	0.0319443	0.00812265	0.0983238	4	4	0	3	Promoter (<=1kb)	1819	ENSG00000108591	DRG2	chr17	17990603	17991111
chr17|18042610|18043746	3.77125	4.9579	5.72469	5.04901	-0.420955	-0.0262694	0.181199	0.00421002	0.0803491	5	7	2	3	Exon (uc021trl.1/51168, exon 18 of 65)	51168	ENSG00000091536	MYO15A	chr17	18042610	18043746
chr17|1821779|1822871	3.54241	4.17505	4.94917	4.49503	-0.343601	-0.106537	0.138855	0.00834974	0.0992421	8	4	1	3	Distal Intergenic	6117	ENSG00000132383	RPA1	chr17	1821779	1822871
chr17|1834219|1835690	3.28447	4.76919	4.42674	4.14414	-0.335412	0.202672	0.0951701	0.00675908	0.0927523	4	6	1	4	Downstream (2-3kb)	146760	ENSG00000185924	RTN4RL1	chr17	1834219	1835690
chr17|18705390|18705704	2.72792	2.54479	4.08536	3.79595	-0.476661	-0.576913	0.106002	0.00242044	0.0690791	0	4	0	0	Intron (uc002gum.2/51030, intron 5 of 6)	51030	ENSG00000171928	TVP23B	chr17	18705390	18705704
chr17|18808428|18808987	4.18822	2.74311	4.13987	3.56176	0.233749	-0.376776	0.216996	0.0072671	0.0948603	7	3	2	0	Intron (uc002guo.2/5636, intron 7 of 10)	5636	ENSG00000141127	PRPSAP2	chr17	18808428	18808987
chr17|18846758|18847281	3.57044	2.19725	3.17533	2.66628	0.421277	-0.279129	0.252079	0.00257355	0.0700738	2	6	2	0	Distal Intergenic	125206	ENSG00000154025	SLC5A10	chr17	18846758	18847281
chr17|18854516|18856123	3.98151	5.83273	6.06589	5.44748	-0.452275	0.0985813	0.155129	0.00407417	0.0794689	3	3	4	3	Promoter (<=1kb)	125206	ENSG00000154025	SLC5A10	chr17	18854516	18856123
chr17|18897005|18898421	3.18494	3.63612	4.46049	4.21739	-0.405085	-0.213949	0.0808533	0.00514085	0.0853475	4	11	3	1	Intron (uc002gur.2/125206, intron 8 of 14)	644815	ENSG00000188522	FAM83G	chr17	18897005	18898421
chr17|1964720|1965988	2.99632	3.37669	4.45006	4.42742	-0.563276	-0.390858	0.00735851	0.000739472	0.0606188	5	4	2	0	3' UTR	3090	ENSG00000177374	HIC1	chr17	1964720	1965988
chr17|2080369|2081379	2.72555	4.09681	4.53751	5.45195	-1.00022	-0.412269	-0.26487	0.0073598	0.0952423	12	6	1	4	Intron (uc010vqv.1/23293, intron 4 of 10)	23293	ENSG00000070366	SMG6	chr17	2080369	2081379
chr17|21183472|21183859	7.315	13.9206	11.616	12.1353	-0.730277	0.198017	-0.0630925	0.00284991	0.0719124	4	5	0	3	Distal Intergenic	5606	ENSG00000034152	MAP2K3	chr17	21183472	21183859
chr17|2134913|2135588	2.88412	3.84004	3.96643	4.63822	-0.685438	-0.272449	-0.225728	0.000217012	0.0606188	8	7	1	1	Intron (uc010vqv.1/23293, intron 2 of 10)	23293	ENSG00000070366	SMG6	chr17	2134913	2135588
chr17|21354871|21357013	3.67984	6.29263	5.11121	5.41301	-0.556788	0.217233	-0.0827657	0.00337011	0.0751345	11	14	1	4	Distal Intergenic	3768	ENSG00000184185	KCNJ12	chr17	21354871	21357013
chr17|2136581|2136966	2.8768	4.32475	5.28809	6.51951	-1.1803	-0.592149	-0.302019	5.15588e-05	0.0606188	4	4	0	1	Intron (uc010vqv.1/23293, intron 2 of 10)	23293	ENSG00000070366	SMG6	chr17	2136581	2136966
chr17|2164008|2164534	3.01967	2.52943	3.79941	3.41272	-0.176532	-0.432109	0.154852	0.00681443	0.0929863	0	2	1	0	Intron (uc031qxx.1/23293, intron 1 of 11)	23293	ENSG00000070366	SMG6	chr17	2164008	2164534
chr17|2180166|2180555	2.90783	2.76723	3.84416	3.12419	-0.10354	-0.175042	0.299187	0.001688	0.0639341	4	4	1	0	Intron (uc002fub.1/23293, intron 8 of 18)	23293	ENSG00000070366	SMG6	chr17	2180166	2180555
chr17|21827390|21829836	3.27078	5.26715	4.38666	4.09225	-0.323259	0.364129	0.100228	0.00763806	0.0963775	8	7	3	5	Promoter (2-3kb)	284123	ENSG00000178130	FAM27E5	chr17	21827390	21829836
chr17|2269767|2272265	2.80908	3.02523	3.9029	3.38724	-0.270014	-0.163066	0.204435	0.0013777	0.0621205	3	2	3	0	Exon (uc002fum.4/9905, exon 12 of 24)	9905	ENSG00000141258	SGSM2	chr17	2269767	2272265
chr17|2294101|2294377	4.17633	3.34497	6.17974	5.52882	-0.404735	-0.724979	0.160573	0.00139684	0.0622804	1	2	0	0	Intron (uc002fur.3/4335, intron 4 of 5)	4335	ENSG00000070444	MNT	chr17	2294101	2294377
chr17|2310609|2311689	2.32658	3.05713	3.0456	2.93131	-0.333338	0.0606307	0.0551801	0.00714313	0.0942599	1	8	0	1	Intron (uc002fus.3/284009, intron 2 of 2)	4335	ENSG00000070444	MNT	chr17	2310609	2311689
chr17|2315818|2317206	2.73652	3.38058	4.07119	4.2464	-0.633895	-0.328969	-0.0607871	0.0039051	0.0784246	8	4	1	2	Promoter (1-2kb)	284009	#N/A	LOC284009	chr17	2315818	2317206
chr17|2321806|2322612	4.33744	3.35772	5.77044	4.87519	-0.168613	-0.537974	0.243223	0.00359244	0.0765517	11	6	4	0	3' UTR	284009	#N/A	LOC284009	chr17	2321806	2322612
chr17|2466465|2467073	4.74203	5.58201	7.17598	6.22932	-0.393572	-0.158292	0.2041	0.0024833	0.0694567	7	4	3	3	Distal Intergenic	5048	ENSG00000007168	PAFAH1B1	chr17	2466465	2467073
chr17|2551220|2551830	3.94833	3.60567	5.27416	5.11939	-0.374728	-0.505702	0.0429695	0.00618999	0.0904357	7	7	4	0	Intron (uc010ckb.2/5048, intron 2 of 7)	5048	ENSG00000007168	PAFAH1B1	chr17	2551220	2551830
chr17|26579770|26580122	5.00183	6.96475	8.59703	9.09016	-0.86185	-0.384235	-0.080468	0.000242852	0.0606188	5	1	1	0	Distal Intergenic	23614	ENSG00000265060	PPY2P	chr17	26579770	26580122
chr17|2688744|2690339	3.90016	5.12806	5.61296	5.41569	-0.47361	-0.0787298	0.0516166	0.00265974	0.0707141	9	11	4	4	Distal Intergenic	23108	ENSG00000132359	RAP1GAP2	chr17	2688744	2690339
chr17|28799349|28799722	6.27862	7.64165	10.238	8.97017	-0.514688	-0.231252	0.190723	0.00261749	0.0704416	6	6	0	2	Distal Intergenic	9527	ENSG00000108587	GOSR1	chr17	28799349	28799722
chr17|28976778|28977955	2.9879	3.3563	4.14113	3.86343	-0.370751	-0.203011	0.100141	0.00633771	0.0909591	7	6	2	2	Intron (uc010csj.3/147172, intron 3 of 3)	6459	#N/A	SH3GL1P2	chr17	28976778	28977955
chr17|29745328|29745950	3.4073	2.70381	4.25738	3.8964	-0.193515	-0.52715	0.127825	0.00392115	0.0784605	9	5	2	0	Intron (uc002hgn.1/84440, intron 1 of 14)	84440	ENSG00000131242	RAB11FIP4	chr17	29745328	29745950
chr17|30023022|30023372	6.78944	8.38891	9.81131	11.1857	-0.720295	-0.415105	-0.189143	0.00825592	0.0988243	4	4	1	1	Distal Intergenic	100126356	ENSG00000283978	MIR365B	chr17	30023022	30023372
chr17|30103968|30104899	4.46203	3.33019	5.44634	4.47659	-0.00470135	-0.426798	0.282886	0.00827086	0.098909	10	8	3	0	Distal Intergenic	55352	ENSG00000172301	COPRS	chr17	30103968	30104899
chr17|30887635|30888285	3.19351	2.04553	2.93616	1.9416	0.717897	0.0752245	0.596682	0.00258063	0.0701729	3	7	3	0	Intron (uc002hho.1/4642, intron 21 of 21)	8851	ENSG00000176749	CDK5R1	chr17	30887635	30888285
chr17|31702317|31702632	6.01127	10.2467	8.23215	11.5626	-0.943724	-0.174312	-0.490125	0.00268173	0.0707214	1	2	0	1	Intron (uc002hhu.3/40, intron 1 of 9)	40	ENSG00000108684	ASIC2	chr17	31702317	31702632
chr17|3283698|3284434	3.50512	4.43192	5.03492	4.79093	-0.450843	-0.112373	0.0716651	0.00617877	0.0903808	10	9	4	4	Distal Intergenic	8387	ENSG00000180016	OR1E1	chr17	3283698	3284434
chr17|34130943|34131358	4.51792	3.982	5.69121	4.81824	-0.0928473	-0.275013	0.240229	0.00698952	0.0936779	0	4	0	0	Distal Intergenic	8148	ENSG00000270647	TAF15	chr17	34130943	34131358
chr17|3416347|3417228	3.96779	5.4427	5.51559	5.85568	-0.561503	-0.105517	-0.0863236	0.00147879	0.0627392	10	5	2	4	Promoter (<=1kb)	84690	ENSG00000141255	SPATA22	chr17	3416347	3417228
chr17|3417667|3420838	2.74373	4.00976	3.69431	3.46115	-0.335112	0.212264	0.094054	0.00282267	0.0716958	7	6	4	3	Promoter (<=1kb)	84690	ENSG00000141255	SPATA22	chr17	3417667	3420838
chr17|34258876|34260251	2.81245	3.18648	3.89314	4.03132	-0.519426	-0.339287	-0.0503172	0.00217343	0.0672001	4	8	2	0	Promoter (1-2kb)	201299	ENSG00000278023	RDM1	chr17	34258876	34260251
chr17|3455647|3459328	3.36943	4.32063	4.18186	3.60179	-0.0962106	0.262525	0.21543	0.00594233	0.0892348	6	7	3	3	Promoter (1-2kb)	162514	ENSG00000167723	TRPV3	chr17	3455647	3459328
chr17|34883294|34884623	3.27066	3.21518	4.51667	3.38812	-0.0509024	-0.0755839	0.414776	0.000990317	0.0606188	11	5	1	0	Exon (uc010cuu.3/80179, exon 4 of 27)	284098	ENSG00000277161	PIGW	chr17	34883294	34884623
chr17|35010463|35010787	4.76694	3.24022	6.52088	4.96457	-0.0586049	-0.615577	0.393398	0.00203273	0.0662832	0	3	1	0	Distal Intergenic	79922	ENSG00000278619	MRM1	chr17	35010463	35010787
chr17|35880641|35881953	1.84136	2.49583	2.58436	2.39074	-0.376688	0.0620592	0.112346	0.00229102	0.0681624	3	4	2	0	Exon (uc002hoa.3/11276, exon 20 of 22)	11072	ENSG00000276023	DUSP14	chr17	35880641	35881953
chr17|36703522|36707601	3.58885	4.35221	3.88498	3.65099	-0.0247663	0.253459	0.0896191	0.00796264	0.0976126	8	5	2	0	Exon (uc002hqd.3/80725, exon 15 of 19)	80725	ENSG00000277363	SRCIN1	chr17	36703522	36707601
chr17|3838411|3841654	2.40078	2.69798	3.36835	2.96133	-0.30274	-0.134364	0.185795	0.00094613	0.0606188	6	5	2	1	Exon (uc002fwx.2/489, exon 15 of 23)	489	ENSG00000074370	ATP2A3	chr17	3838411	3841654
chr17|38607908|38608252	5.19887	6.21537	11.0465	8.38956	-0.690397	-0.432754	0.396927	0.000829564	0.0606188	3	3	1	1	Intron (uc002hus.3/3487, intron 1 of 3)	3487	ENSG00000141753	IGFBP4	chr17	38607908	38608252
chr17|38619429|38619861	2.69241	3.30587	4.76722	5.25152	-0.963835	-0.667706	-0.139587	0.0020318	0.0662792	8	3	2	3	Distal Intergenic	84951	ENSG00000131746	TNS4	chr17	38619429	38619861
chr17|38778238|38778585	7.01364	8.6397	11.4948	11.0218	-0.652129	-0.35131	0.0606159	0.00521143	0.0855732	6	5	1	1	Distal Intergenic	6605	ENSG00000073584	SMARCE1	chr17	38778238	38778585
chr17|38927981|38928381	3.8227	3.47592	5.51045	3.56366	0.101232	-0.0359638	0.628809	0.00429524	0.0807912	0	3	1	1	Promoter (<=1kb)	353288	ENSG00000186393	KRT26	chr17	38927981	38928381
chr17|38990796|38991253	3.12933	2.10246	4.22839	3.08138	0.0222792	-0.551495	0.456533	0.00476492	0.0834713	2	4	2	0	Exon (uc021txc.1/147184, exon 3 of 3)	3858	ENSG00000186395	KRT10	chr17	38990796	38991253
chr17|39136444|39136781	4.67284	4.92271	7.18744	6.53147	-0.483108	-0.407955	0.138071	0.00600195	0.089505	2	2	1	0	Intron (uc002hvq.1/125115, intron 7 of 8)	125115	ENSG00000204889	KRT40	chr17	39136444	39136781
chr17|39139938|39140641	4.5357	6.01538	6.66951	6.91756	-0.608939	-0.201609	-0.0526839	0.00247649	0.0694567	2	4	2	2	Promoter (2-3kb)	125115	ENSG00000204889	KRT40	chr17	39139938	39140641
chr17|39388035|39388411	4.68505	4.35433	6.24889	7.16386	-0.612671	-0.718286	-0.197135	0.00365859	0.0770626	2	6	1	0	Promoter (<=1kb)	83900	ENSG00000204873	KRTAP9-3	chr17	39388035	39388411
chr17|39581965|39582359	4.05922	3.57861	5.79398	4.89975	-0.271506	-0.453308	0.241848	0.00390332	0.0784246	0	3	0	0	Promoter (1-2kb)	8688	ENSG00000108417	KRT37	chr17	39581965	39582359
chr17|39696828|39697911	4.24532	6.78727	5.6163	4.41322	-0.0559598	0.620999	0.347787	0.00280594	0.0716958	6	6	2	5	Intron (uc010wfs.2/3728, intron 4 of 8)	3880	ENSG00000171345	KRT19	chr17	39696828	39697911
chr17|40058255|40060228	2.37162	2.84383	3.12147	2.84801	-0.264081	-0.00211852	0.132274	0.00503218	0.0847897	3	4	4	0	Intron (uc002hyg.3/47, intron 10 of 28)	47	ENSG00000131473	ACLY	chr17	40058255	40060228
chr17|4033602|4034308	4.24141	5.05489	6.86662	7.68105	-0.856758	-0.603623	-0.161703	6.62451e-05	0.0606188	5	4	1	1	Intron (uc002fxe.3/23140, intron 1 of 54)	23140	ENSG00000074755	ZZEF1	chr17	4033602	4034308
chr17|40443657|40445385	3.64769	3.30996	4.36562	3.56813	0.0318177	-0.10835	0.29102	0.00249469	0.0696188	5	9	3	0	Exon (uc002hzj.2/6776, exon 5 of 20)	6776	ENSG00000126561	STAT5A	chr17	40443657	40445385
chr17|4072602|4076699	3.0703	2.94402	3.72631	3.12564	-0.0257712	-0.0863668	0.253594	0.0082224	0.0986881	12	8	4	0	Exon (uc002fxn.3/51479, exon 21 of 25)	124936	ENSG00000167740	CYB5D2	chr17	4072602	4076699
chr17|40804083|40806295	3.52593	5.13326	4.89368	5.30395	-0.589064	-0.0471927	-0.116148	0.00809332	0.0981324	9	9	1	5	Distal Intergenic	27175	ENSG00000037042	TUBG2	chr17	40804083	40806295
chr17|4088138|4089150	2.90602	2.64984	3.98705	3.47142	-0.256478	-0.389621	0.199797	0.00690143	0.093378	7	7	2	0	Exon (uc002fxn.3/51479, exon 12 of 25)	124936	ENSG00000167740	CYB5D2	chr17	4088138	4089150
chr17|41389940|41390595	3.82445	2.59936	4.63064	3.92112	-0.0360147	-0.593109	0.239943	0.00368539	0.0771143	7	3	1	0	Distal Intergenic	100874261	ENSG00000236383	LINC00854	chr17	41389940	41390595
chr17|41436444|41438495	3.31915	5.83228	4.71352	4.78067	-0.526401	0.286847	-0.020409	0.00513151	0.085298	13	10	2	5	Distal Intergenic	100130581	ENSG00000188825	LINC00910	chr17	41436444	41438495
chr17|41709752|41710057	6.1299	6.51876	7.84626	8.06854	-0.396442	-0.30771	-0.0403024	0.00371577	0.0773636	1	1	0	1	Distal Intergenic	4222	ENSG00000005102	MEOX1	chr17	41709752	41710057
chr17|41811822|41812119	4.77515	4.98093	7.62616	7.78597	-0.705331	-0.644461	-0.02992	0.00133221	0.0619395	1	2	0	1	Distal Intergenic	50964	ENSG00000167941	SOST	chr17	41811822	41812119
chr17|41880509|41881322	4.04978	4.74068	6.38409	6.06153	-0.581836	-0.354588	0.0747997	0.000149478	0.0606188	8	6	2	3	Intron (uc002ieh.3/4356, intron 17 of 17)	284067	ENSG00000231256	C17orf105	chr17	41880509	41881322
chr17|41956051|41956394	7.94126	12.6281	12.8731	12.4787	-0.652027	0.0171726	0.0448978	0.00686401	0.0932114	3	3	1	1	Intron (uc002ien.1/4355, intron 11 of 11)	4355	ENSG00000108852	MPP2	chr17	41956051	41956394
chr17|42406695|42407361	2.58271	3.98808	3.80109	3.96129	-0.617089	0.00972188	-0.0595604	0.000736064	0.0606188	0	4	0	0	Distal Intergenic	51629	ENSG00000013306	SLC25A39	chr17	42406695	42407361
chr17|42804389|42805227	2.59334	2.46515	3.64452	3.22634	-0.315091	-0.388226	0.175827	0.000179494	0.0606188	2	2	2	0	Intron (uc010wjb.1/80174, intron 3 of 8)	80174	ENSG00000161692	DBF4B	chr17	42804389	42805227
chr17|42882087|42883498	3.90405	4.62605	5.44768	4.44886	-0.188462	0.0563462	0.292208	0.00822612	0.0986881	8	11	2	2	Promoter (1-2kb)	10052	ENSG00000182963	GJC1	chr17	42882087	42883498
chr17|43180552|43183132	2.83184	3.82552	4.61955	3.75623	-0.407547	0.0263697	0.298465	0.000238158	0.0606188	7	5	3	3	Promoter (<=1kb)	4836	ENSG00000136448	NMT1	chr17	43180552	43183132
chr17|43329452|43329776	4.97587	2.58084	3.30921	2.1409	1.21673	0.269625	0.62827	0.0040612	0.0794457	0	4	0	0	Intron (uc010dah.3/100133991, intron 1 of 2)	100133991	ENSG00000267278	MAP3K14-AS1	chr17	43329452	43329776
chr17|435346|436609	3.06883	2.78756	3.90408	3.28852	-0.0997506	-0.238438	0.247544	0.00610632	0.0899816	7	8	2	0	3' UTR	55275	ENSG00000141252	VPS53	chr17	435346	436609
chr1|74357645|74357973	6.87154	4.16575	9.00333	9.28143	-0.433714	-1.15577	-0.0438878	0.0065718	0.091803	1	4	1	0	Distal Intergenic	127255	ENSG00000162620	LRRIQ3	chr1	74357645	74357973
chr17|44185923|44186359	7.53751	13.3782	12.9124	13.3922	-0.829227	-0.00150022	-0.0526254	0.00610079	0.0899203	12	12	1	4	Intron (uc002ikc.3/284058, intron 2 of 14)	284058	ENSG00000120071	KANSL1	chr17	44185923	44186359
chr17|44855885|44857170	2.93984	4.30434	4.18466	4.2639	-0.536437	0.0136179	-0.0270654	0.0020402	0.066315	2	3	3	0	Intron (uc002ikv.3/7473, intron 1 of 4)	7473	ENSG00000108379	WNT3	chr17	44855885	44857170
chr17|45016357|45018461	2.9005	3.78703	4.85867	4.01188	-0.467974	-0.0832105	0.276282	7.03944e-05	0.0606188	6	5	1	3	3' UTR	9570	ENSG00000108433	GOSR2	chr17	45016357	45018461
chr17|4566006|4567153	2.35303	3.12044	3.31507	3.12899	-0.411177	-0.00394961	0.0833413	0.00298183	0.0728072	0	4	2	0	Distal Intergenic	246	ENSG00000161905	ALOX15	chr17	4566006	4567153
chr17|45770412|45771110	5.57562	9.04595	9.11637	8.29592	-0.573271	0.124869	0.136058	0.00532393	0.0861519	9	5	3	5	Promoter (1-2kb)	9755	ENSG00000198933	TBKBP1	chr17	45770412	45771110
chr17|46092242|46092950	4.36468	5.31992	6.2725	6.01436	-0.462535	-0.177006	0.0606295	0.0061536	0.090223	2	4	4	1	Distal Intergenic	406943	ENSG00000207947	MIR152	chr17	46092242	46092950
chr17|46221186|46221814	4.6714	7.07777	6.92849	9.40224	-1.00915	-0.409709	-0.440464	0.0044749	0.0819097	4	5	0	3	Intron (uc002ini.1/8631, intron 11 of 12)	100302211	ENSG00000221739	MIR1203	chr17	46221186	46221814
chr17|46820741|46821043	2.97117	6.23466	5.61836	7.45052	-1.32631	-0.25703	-0.407191	2.13472e-05	0.0606188	0	1	0	1	Distal Intergenic	10481	ENSG00000159184	HOXB13	chr17	46820741	46821043
chr17|47274235|47274813	3.92171	3.57053	5.16238	4.89344	-0.319368	-0.454711	0.0771865	0.0054413	0.0867582	0	3	1	0	Distal Intergenic	2793	ENSG00000167083	GNGT2	chr17	47274235	47274813
chr17|47484072|47484473	4.83155	3.36024	6.07992	4.57694	0.0781055	-0.44582	0.40967	0.00218241	0.06722	5	4	0	0	Exon (uc002iox.1/5245, exon 6 of 7)	5245	ENSG00000167085	PHB	chr17	47484072	47484473
chr17|47684873|47685283	4.05492	1.91935	4.06082	3.61139	0.167121	-0.911932	0.169217	0.00659568	0.091991	6	4	1	0	Exon (uc010dbk.3/8405, exon 8 of 11)	11248	ENSG00000182575	NXPH3	chr17	47684873	47685283
chr17|48268823|48272676	4.14366	5.80206	6.50914	6.51283	-0.652382	-0.16672	-0.000818622	0.000873566	0.0606188	10	7	3	4	Exon (uc002iqm.3/1277, exon 19 of 51)	1277	ENSG00000108821	COL1A1	chr17	48268823	48272676
chr17|48347659|48348088	4.77047	7.68095	8.05805	9.23088	-0.952336	-0.265183	-0.196037	0.00217642	0.0672001	6	3	1	3	Promoter (<=1kb)	162461	ENSG00000167105	TMEM92	chr17	48347659	48348088
chr17|4875278|4877038	2.68552	3.14377	4.25839	3.97845	-0.567007	-0.33971	0.0981003	0.000271123	0.0606188	7	3	1	1	Exon (uc002gag.2/23125, exon 12 of 22)	9552	ENSG00000091640	SPAG7	chr17	4875278	4877038
chr17|48802213|48802697	3.03219	2.59542	2.01737	2.39213	0.342064	0.117673	-0.245821	0.00417374	0.0801293	4	3	1	0	Intron (uc002isp.2/51747, intron 1 of 8)	51747	ENSG00000108848	LUC7L3	chr17	48802213	48802697
chr17|4905426|4906969	3.31805	3.84742	4.66728	3.88383	-0.227146	-0.0135873	0.265101	0.00072997	0.0606188	7	10	2	1	Exon (uc002gan.2/10749, exon 7 of 23)	10749	ENSG00000129250	KIF1C	chr17	4905426	4906969
chr17|4975009|4976142	2.16383	3.11709	3.00627	2.94271	-0.443561	0.0830552	0.0308308	0.00464294	0.0827781	3	4	2	0	Distal Intergenic	124961	ENSG00000180787	ZFP3	chr17	4975009	4976142
chr17|51706211|51706541	6.46788	6.0267	9.31722	8.75592	-0.436967	-0.538892	0.0896398	0.00730338	0.0950277	2	1	1	1	Distal Intergenic	84643	ENSG00000141200	KIF2B	chr17	51706211	51706541
chr17|5414674|5414929	3.12755	4.21608	5.35182	5.98397	-0.936072	-0.505201	-0.161073	0.00622378	0.0905648	0	2	0	1	Intron (uc002gcg.1/22861, intron 15 of 15)	728392	#N/A	LOC728392	chr17	5414674	5414929
chr17|54831355|54832369	4.60742	6.12878	6.25062	5.863	-0.347681	0.0639615	0.0923592	0.00148288	0.0627392	5	6	3	4	Distal Intergenic	339210	ENSG00000214226	C17orf67	chr17	54831355	54832369
chr17|55516120|55517013	1.90949	2.09489	1.41606	1.69664	0.17051	0.304193	-0.260794	0.00266461	0.0707141	1	4	0	0	Intron (uc010wnm.1/124540, intron 6 of 13)	124540	ENSG00000153944	MSI2	chr17	55516120	55517013
chr17|55530990|55531631	3.21751	2.06783	2.68788	1.73619	0.890016	0.252189	0.630542	0.000699918	0.0606188	3	6	1	0	Intron (uc010wnm.1/124540, intron 6 of 13)	124540	ENSG00000153944	MSI2	chr17	55530990	55531631
chr17|55646028|55646586	4.30783	4.57508	5.97141	5.74628	-0.415668	-0.328829	0.0554437	0.00243378	0.0691608	6	2	2	1	Intron (uc010wnm.1/124540, intron 7 of 13)	51649	ENSG00000181610	MRPS23	chr17	55646028	55646586
[truncated: 2,844 more rows]

## Sheet: 1b.DMR
					Landscape of 5-hydromethylcytosine in breast cancer
					Differentially methylated breast cancer loci
DMR-LOCI	baseMean	stat	pvalue	padj	TAN_l2fc	DAN_l2fc	PAN_l2fc	PN_peaks	T_peaks	AN_peaks	D_peaks	seqnames	start	end	Annoatation	geneId	distanceToTSS	Gene symbol
chr1|169396262|169397095	46.9285	65.9523	3.13782e-14	7.25623e-11	3.86411	3.45105	0.360287	0	11	0	3	chr1	169396262	169397095	Promoter (<=1kb)	57821	0	CCDC181
chr15|30395122|30396574	13.165	35.6343	8.9474e-08	1.98594e-05	3.7082	1.04014	0.548494	10	9	3	5	chr15	30395122	30396574	Promoter (<=1kb)	89837	0	ULK4P3
chr21|38068016|38070413	102.476	145.362	2.63692e-31	6.18937e-26	3.04989	2.02635	-0.122886	0	12	0	2	chr21	38068016	38070413	Promoter (1-2kb)	6493	-1578	SIM2
chr1|448497|453579	3.34985	20.3449	0.000143975	0.00631008	3.00066	0.559552	1.50604	12	12	5	5	chr1	448497	453579	Distal Intergenic	729759	80838	OR4F29
chr7|8481146|8484146	121.622	166.534	7.12822e-36	3.34626e-30	2.80964	2.3108	-0.305642	0	13	0	4	chr7	8481146	8484146	Intron (uc003srv.3/30010, intron 2 of 2)	30010	7561	NXPH1
chr11|32454452|32460061	131.556	119.427	1.02516e-25	6.9151e-21	2.79176	1.66559	0.126345	0	12	0	2	chr11	32454452	32460061	Promoter (<=1kb)	51352	0	WT1-AS
chr6|19836482|19837958	45.19	56.6206	3.09675e-12	3.75456e-09	2.78861	1.93718	0.109466	0	11	0	2	chr6	19836482	19837958	Promoter (<=1kb)	3400	0	ID4
chr10|102982138|102983846	42.0968	91.6356	9.75465e-20	1.63543e-15	2.77154	1.98174	0.427015	0	11	0	2	chr10	102982138	102983846	Downstream (2-3kb)	10660	4871	LBX1
chr7|1269090|1271261	60.4229	75.998	2.21409e-16	9.80549e-13	2.77099	2.3001	0.497711	1	11	0	3	chr7	1269090	1271261	Promoter (1-2kb)	340260	-1393	UNCX
chr21|38064346|38067417	104.001	119.415	1.03114e-25	6.9151e-21	2.76642	2.1108	0.0484087	0	12	0	3	chr21	38064346	38067417	Distal Intergenic	6493	-4574	SIM2
chr8|23562291|23565274	101.635	102.673	4.137e-22	1.61839e-17	2.76559	2.2155	0.170548	0	12	0	2	chr8	23562291	23565274	Promoter (<=1kb)	137814	0	NKX2-6
chr1|147774436|147776243	26.6546	66.277	2.67396e-14	6.43725e-11	2.75287	2.03349	0.382831	2	12	2	4	chr1	147774436	147776243	Exon (uc021ovt.1/uc021ovt.1, exon 1 of 1)	100847044	30435	MIR5087
chr1|224803102|224805943	117.305	72.6676	1.14527e-15	4.10407e-12	2.74292	1.45097	0.0977	5	12	1	1	chr1	224803102	224805943	Promoter (<=1kb)	149111	0	CNIH3
chr20|37351983|37358250	215.067	81.6098	1.38575e-17	9.56655e-14	2.61976	1.73146	-0.199208	1	12	1	4	chr20	37351983	37358250	Promoter (<=1kb)	140679	0	SLC32A1
chr18|44787089|44790873	91.7651	86.4287	1.28076e-18	1.22701e-14	2.59282	1.79642	-0.409764	0	11	0	2	chr18	44787089	44790873	Distal Intergenic	652991	-11535	SKOR2
chr9|70917260|70919525	55.7635	40.8699	6.9681e-09	2.43748e-06	2.56276	1.99302	0.40883	7	13	0	3	chr9	70917260	70919525	Promoter (<=1kb)	286380	0	FOXD4L3
chr1|147532310|147534370	27.2794	35.6443	8.90393e-08	1.97722e-05	2.53762	1.57479	-0.663675	10	13	4	5	chr1	147532310	147534370	Distal Intergenic	728939	-47979	#N/A
chr12|131783161|131784695	12.3304	21.1608	9.74811e-05	0.00471865	2.51423	1.45261	-0.261882	8	12	4	4	chr12	131783161	131784695	Distal Intergenic	116437	133605	LINC01257
chr9|100613423|100618271	138.629	60.6292	4.31329e-13	6.84063e-10	2.49684	2.32464	0.343165	0	11	0	4	chr9	100613423	100618271	Promoter (<=1kb)	2304	0	FOXE1
chr8|99951051|99953122	84.568	70.6005	3.17438e-15	9.61404e-12	2.45877	1.46723	0.371993	4	11	2	1	chr8	99951051	99953122	Promoter (1-2kb)	6788	1677	STK3
chr2|74741823|74744084	103.37	58.4212	1.27782e-12	1.7287e-09	2.44845	1.96226	0.0907359	1	11	0	4	chr2	74741823	74744084	Promoter (<=1kb)	3196	227	TLX2
chr13|58206274|58209014	134.326	106.91	5.07305e-23	2.6461e-18	2.41789	2.16097	0.0285725	0	11	0	4	chr13	58206274	58209014	Promoter (<=1kb)	27253	485	PCDH17
chr5|63256556|63257951	48.0932	86.9687	9.80647e-19	1.00077e-14	2.40177	2.0882	0.0691542	0	12	0	2	chr5	63256556	63257951	Promoter (<=1kb)	3350	168	HTR1A
chr3|127794117|127796359	133.42	30.293	1.19744e-06	0.000158621	2.36737	1.86626	0.0420308	4	11	1	2	chr3	127794117	127796359	Intron (uc003ekf.3/8607, intron 9 of 9)	29927	10375	SEC61A1
chr2|121625261|121625923	29.3115	99.2783	2.22158e-21	6.95263e-17	2.30166	1.87262	-0.599429	0	11	0	3	chr2	121625261	121625923	Intron (uc010yyu.1/2736, intron 2 of 3)	2736	70394	GLI2
chr10|7448814|7451618	122.989	35.8057	8.23132e-08	1.85418e-05	2.29538	1.30698	-0.108113	7	11	2	3	chr10	7448814	7451618	Promoter (<=1kb)	57713	0	SFMBT2
chr6|26613362|26615071	77.5581	61.7376	2.49993e-13	4.37897e-10	2.28456	1.16223	0.459027	8	11	1	0	chr6	26613362	26615071	Distal Intergenic	29777	16191	ABT1
chr20|44685497|44688045	180.7	46.7837	3.86392e-10	2.18802e-07	2.26081	1.96745	0.203461	4	11	2	4	chr20	44685497	44688045	3' UTR	57727	11130	NCOA5
chr3|107148147|107148630	25.4897	58.3814	1.30308e-12	1.75277e-09	2.25215	1.80973	-0.807427	0	11	0	3	chr3	107148147	107148630	Distal Intergenic	84692	51959	CCDC54
chr1|234040154|234042207	97.694	41.1257	6.14971e-09	2.19704e-06	2.24962	1.49058	0.146947	2	12	1	2	chr1	234040154	234042207	Promoter (<=1kb)	148641	0	SLC35F3
[truncated: 4,779 more rows]
